# Supplementary material for: Chlorophyll-a Estimation in 149 Tropical Semi-Arid Reservoirs Using Remote Sensing and Machine Learning
Source: Preprints.org preprint supplement (doi:10.20944/preprints202312.1854.v1), 2023-12-25
Supplement: Supplementary file 1 [file supplementary]

## Sheet: Sheet1
B02	B03	B04	B05	B06	B07	B8A	B09	B10	B12	NDVI	GNDVI	SAVI	MSI	GCI	NBRI	NDSI	ARVI	AWEI	X1	X2	X3	X4	X5	X6	X7	X8	X9	X10	C_temp	SubModel1	SubModel2	SubModel3	SubModel4	SubModel5	SubModel6	SubModel7	SubModel8	SubModel9	SubModel10	SubModel11	SubModel12	SubModel13	SubModel14	SubModel15	SubModel16	SubModel17	SubModel18	SubModel19	SubModel20
873	846	512	1127	1245	1356	911	115	14	165	0.348186	0.111811	0.497074	0.238905	-0.864066	0.730392	0.539581	0.307172	1653.5	0.792149	10.4066	9.69407	11.0684	9.4578	0.814115	0.900573	0.6205	418.006	772.226	1001.78	4.86294	0.70351	123.675	9.17448	745.001	9.4578	84.9758	885.217	997.803	8	11.825	49.4284	10.4066	10.7578	29.736	273.556	744.17	753.716	919.478	993.922
815	732	466	903	925	1016	655	72	10	155	0.2544	0.0343008	0.363159	0.341837	-0.901639	0.669862	0.464	0.263532	1233.75	0.713453	9.66561	8.68455	10.0531	9.01233	0.774175	0.874974	0.699208	378.958	636.726	706.07	4.16017	0.633635	140.874	8.60302	627.794	9.01233	72.9944	790.618	730.755	7.75286	10.7253	44.4003	9.66561	9.74348	32.9335	230.875	639.83	641.624	692.821	700.289
827	798	503	881	702	781	538	162	9	147	0.0993733	-0.130312	0.141851	0.47557	-0.796992	0.613666	0.46422	0.177769	1466.25	0.521527	9.58647	8.13319	9.2091	9.27544	0.774298	0.849788	0.780557	276.692	345.447	310.1	5.45136	0.463187	89.6517	7.0166	373.963	9.27544	87.9464	300.558	271.082	7.95285	11.3606	47.7809	9.58647	8.88749	56.6934	197.968	370.612	364.026	335.885	294.721
1228	1398	958	1621	1338	1452	1133	137	8	450	0.0635386	-0.124698	0.0907142	0.516544	-0.902003	0.414824	0.426531	0.094518	1834.5	0.449323	11.747	10.425	11.3237	11.1816	0.752749	0.745798	0.80236	288.853	375.264	281.56	5.15514	0.399036	92.7785	7.21294	406.495	11.1816	92.1477	312.742	277.929	9.85799	12.2416	63.6831	11.747	11.0193	65.7572	176.252	376.198	374.602	418.29	396.512
927	981	628	1011	715	767	557	96	26	192	-0.0228013	-0.240987	-0.0325489	0.465	-0.902141	0.515152	0.557143	0.0973769	2130	-0.319285	10.0365	8.22783	9.15374	9.93626	0.822853	0.801638	0.774731	226.732	236.612	272.98	4.57886	-0.283565	52.8674	6.18508	271.838	9.93626	99.4925	149.33	155.171	8.56354	12.8665	56.7653	10.0365	8.94201	74.5279	169.741	255.07	246.802	218.383	197.922
816	751	476	816	534	572	417	98	11	162	-0.0280778	-0.250624	-0.0400765	0.555556	-0.869507	0.470588	0.5005	0.141569	1446	-0.342213	9.34466	7.471	8.30103	9.08964	0.793965	0.777822	0.822071	220.541	224.653	271.06	4.61044	-0.30394	50.7035	6.07907	253.623	9.08964	78.3764	213.965	233.394	7.80793	11.3081	46.4191	9.34466	8.11298	77.2397	191.335	250.142	241.019	201.26	173.568
864	814	546	904	676	723	497	104	15	226	0.0135501	-0.184	0.0193421	0.629234	-0.872236	0.425667	0.39503	0.1323	1082.25	0.268432	9.66918	7.9211	8.97524	9.33702	0.733742	0.75224	0.856914	267.207	323.096	269.98	4.70267	0.238405	92.0777	6.86189	347.542	9.33702	79.519	314.718	281.727	8.1733	10.267	46.6999	9.66918	8.77638	64.5163	179.751	348.769	340.963	298.056	267.702
1382	1468	1304	1558	1395	1530	1404	187	12	855	-0.051189	-0.110019	-0.0730853	0.920986	-0.872616	0.158465	0.15047	-0.00948326	-1109.5	-0.418097	11.5928	11.1975	11.523	11.3652	0.531884	0.541141	0.972936	131.076	89.5152	231.94	5.71848	-0.371301	31.0809	4.47334	64.7778	11.3652	70.775	56.4363	59.7966	10.9251	-10.3524	28.6867	11.5928	11.1736	54.4925	72.037	78.7382	81.953	99.2823	103.037
858	760	465	713	449	450	290	67	11	120	-0.148148	-0.375566	-0.211444	0.469565	-0.911842	0.483871	0.64859	0.127989	1975.75	-0.595751	8.93367	6.61911	7.66309	9.12581	0.865612	0.785073	0.777258	202.304	191.392	204.25	4.06155	-0.529134	40.0089	5.7629	222.583	9.12581	66.315	220.502	254.066	7.74731	12.5481	49.2905	8.93367	7.65741	77.0517	156.809	217.145	204.907	125.055	124.109
1148	1015	724	894	717	766	628	89	8	475	-0.0623624	-0.227328	-0.0890256	0.910798	-0.912315	0.147217	0.271133	0.104791	266	-0.446517	9.63339	8.56354	9.14976	10.0498	0.647234	0.528023	0.969335	144.839	105.72	192.06	4.46475	-0.396559	45.4202	4.72846	112.623	10.0498	47.0622	129.992	138.457	8.97938	6.43123	43.4491	9.63339	8.95034	56.3333	89.9076	108.438	105.077	124.597	127.43
870	834	567	839	564	582	415	101	11	214	-0.113949	-0.298054	-0.162651	0.627494	-0.878897	0.356391	0.493286	0.0761711	1502.75	-0.545865	9.43164	7.45904	8.34913	9.41287	0.790132	0.708993	0.856124	196.15	180.827	188.39	4.65701	-0.484808	35.5287	5.65485	207.627	9.41287	82.8453	154.774	173.955	8.27677	11.4541	50.662	9.43164	8.26215	74.925	144.977	199.565	191.319	171.792	164.916
826	696	475	641	486	503	437	98	13	202	-0.0638298	-0.249551	-0.0911053	0.755981	-0.859195	0.348387	0.375494	0.134002	860	-0.449968	8.62222	7.58858	7.95285	8.8621	0.721441	0.703646	0.910969	117.187	74.8525	186.12	4.61044	-0.399645	42.9963	4.2144	83.3918	8.8621	57.6824	84.2246	88.8747	7.80245	9.50969	41.69	8.62222	7.86222	53.8234	118.679	79.1708	76.3464	92.5851	103.384
842	746	446	668	444	469	327	62	8	54	-0.10396	-0.34657	-0.148377	0.259669	-0.91689	0.740385	0.77619	0.148855	2369	-0.529406	8.74162	6.88942	7.76946	9.06942	0.919015	0.904661	0.637979	167.306	135.755	183.49	3.95789	-0.470207	46.9317	5.13947	162.508	9.06942	67.6634	150.588	161.084	7.64032	13.3308	50.571	8.74162	7.62888	68.7387	149.804	152.832	143.907	121.638	122.95
1007	870	562	786	598	637	430	174	8	136	-0.0923226	-0.301421	-0.131782	0.372591	-0.8	0.548922	0.666667	0.134719	2293.25	-0.508884	9.22871	7.54784	8.60425	9.5464	0.87358	0.818786	0.719577	181.404	156.871	177.53	5.58277	-0.451963	27.3536	5.39321	186.31	9.5464	50.2219	220.128	266.952	8.25237	13.1871	55.265	9.22871	8.42494	58.8404	128.213	170.894	164.245	164.329	161.318
820	630	445	550	497	515	473	89	7	153	0.00112233	-0.171004	0.00160192	0.621076	-0.85873	0.489149	0.389195	0.174397	879.75	0.117008	8.19321	7.79149	8.01559	8.57262	0.730111	0.787917	0.853195	98.1177	57.4851	169.46	4.46475	0.103922	86.9292	3.85939	63.0587	8.57262	37.1718	75.5345	61.4161	7.63461	9.58193	40.4234	8.19321	7.9211	34.6338	93.7207	58.7899	58.2033	72.6742	86.1122
1034	920	708	865	665	689	616	182	66	402	-0.0670686	-0.195582	-0.095743	0.877221	-0.802174	0.212537	0.25769	0.0772239	247.75	-0.457477	9.52808	8.50864	8.83228	9.72589	0.636354	0.596776	0.957274	106.865	65.0547	167.21	5.66705	-0.406293	29.4232	4.02185	67.7554	9.72589	54.9002	70.145	75.2194	8.91274	6.28065	42.6406	9.52808	8.72852	60.1927	87.1607	63.4646	62.1078	77.473	88.746
877	830	547	793	486	513	375	78	9	133	-0.139583	-0.335479	-0.199236	0.535109	-0.906024	0.512821	0.579448	0.0822148	1967	-0.584058	9.25602	7.21125	8.0052	9.3978	0.833691	0.800427	0.811859	173.011	144.09	163.28	4.27266	-0.518734	37.8986	5.24257	169.992	9.3978	79.4581	130.791	143.495	8.17829	12.5295	52.8229	9.25602	7.86222	84.238	139.091	160.72	151.119	120.203	123.6
1133	971	752	1018	795	889	758	102	11	452	0.0640946	-0.0635268	0.0915027	0.722807	-0.894954	0.30834	0.222152	0.138603	-44.75	0.450621	10.0596	9.11779	9.6154	9.90238	0.605643	0.67558	0.897444	189.28	169.427	158.76	4.67233	0.400197	105.694	5.53343	150.144	9.90238	41.2873	189.752	132.903	9.09367	-3.55029	25.9263	10.0596	9.2638	62.5065	115.613	178.271	175.573	207.492	200.957
808	716	491	629	585	545	490	260	8	227	0.0238569	-0.163282	0.0340531	0.815534	-0.636872	0.38814	0.260563	0.147939	431	0.32413	8.56808	7.88374	8.16831	8.94618	0.638711	0.729451	0.934288	115.168	72.8622	154.68	6.3825	0.287875	58.7277	4.17671	78.2095	8.94618	70.5686	67.5274	67.6127	7.88909	7.55369	37.6457	8.56808	8.36345	34.884	103.469	74.1195	73.7499	92.9609	103.072
782	708	415	631	387	384	279	60	8	87	-0.13388	-0.381463	-0.191069	0.444795	-0.915254	0.569307	0.667845	0.13945	1949.5	-0.575965	8.57715	6.53434	7.26848	8.91274	0.874095	0.828798	0.763343	160.462	126.136	151.66	3.91487	-0.51157	43.8198	5.0151	149.26	8.91274	77.7188	116.778	124.381	7.45904	12.4923	46.6026	8.57715	7.28736	75.616	154.441	144.142	134.071	99.7002	105.189
827	676	412	519	360	367	279	64	6	79	-0.165488	-0.392379	-0.236174	0.416949	-0.905325	0.57754	0.692115	0.153135	1921	-0.618126	8.03629	6.53434	7.1596	8.77638	0.884558	0.832774	0.74707	102.837	61.4853	151.15	4	-0.549021	39.117	3.94691	71.187	8.77638	50.7223	76.8203	81.6856	7.44102	12.4311	46.2707	8.03629	7.11379	56.5319	99.3998	67.5583	61.8171	64.451	80.6241
909	850	514	794	477	498	343	73	9	115	-0.127193	-0.362179	-0.181546	0.449749	-0.914118	0.551657	0.652089	0.119486	2268.25	-0.566234	9.25991	7	7.92641	9.47268	0.867166	0.820143	0.766167	195.392	179.549	145.96	4.17934	-0.502907	40.6084	5.6415	211.511	9.47268	74.3031	183.884	206.367	8.0104	13.139	53.1693	9.25991	7.81339	86.7682	158.67	202.149	189.505	107.351	110.048
1052	964	690	876	657	680	533	75	9	165	-0.0969793	-0.258486	-0.138439	0.454225	-0.922199	0.549795	0.577741	0.08	2228.25	-0.517313	9.5683	8.10791	8.79366	9.87853	0.832871	0.81922	0.7687	139.77	99.5589	145.55	4.21716	-0.459437	43.8414	4.63475	119.042	9.87853	60.0758	118.883	126.74	8.83656	13.0613	59.3235	9.5683	8.69338	63.3226	98.2602	102.97	99.1354	115.685	120.924
972	796	590	662	544	621	554	167	11	292	-0.0845588	-0.230294	-0.120703	0.803213	-0.790201	0.260759	0.331104	0.109434	656.5	-0.494203	8.71537	8.21303	8.5316	9.26768	0.691812	0.638871	0.929559	73.7669	39.96	145.35	5.50688	-0.438921	28.9652	3.41881	41.9451	9.26768	40.684	47.3347	49.5349	8.38721	8.69117	44.4129	8.71537	8.16331	46.8484	65.0695	38.7774	37.6929	45.9106	58.656
3278	2659	2011	1740	1239	996	816	570	12	537	0.210908	0.0743255	0.301152	0.461439	-0.785634	0.703561	0.302474	0.225496	2691.75	0.670289	12.0277	9.34466	9.98665	13.8539	0.671268	0.889407	0.772748	111.064	68.9274	144.62	8.29134	0.595248	36.2932	4.10013	82.4788	13.8539	9.31473	123.877	136.074	12.6223	13.9106	79.5921	12.0277	10.7405	89.7742	1.12831	59.0878	54.75	62.2603	40.0005
2216	2064	2159	2346	2412	2545	2632	821	22	2150	0.0872966	0.109577	0.124648	1.26361	-0.602229	0.0893689	-0.223184	0.0516143	-11299.5	0.49953	13.2875	13.8069	13.653	12.7322	-0.606579	0.447091	1.08111	80.7801	44.4723	142.43	9.3637	0.443608	21.0087	3.54294	24.1691	12.7322	24.7589	24.7924	22.5191	12.9246	-22.4398	31.3001	13.2875	13.4109	41.8314	41.4932	30.8796	35.1334	26.0832	34.0444
861	862	545	860	542	552	373	73	7	114	-0.117949	-0.334365	-0.168357	0.351163	-0.915313	0.580882	0.701876	0.0844183	2423	-0.552175	9.50969	7.1984	8.20313	9.51705	0.888696	0.834378	0.705509	210.224	205.477	141.03	4.17934	-0.490416	41.7034	5.90093	240.784	9.51705	93.1019	149.421	163.378	8.16831	13.4313	55.2894	9.50969	8.15329	83.7776	164.848	228.359	217.14	150.584	142.208
1243	1131	825	997	807	858	708	118	20	320	-0.0742188	-0.228013	-0.105955	0.623066	-0.895668	0.379243	0.437103	0.0843507	1694.25	-0.473195	9.98999	8.91274	9.50231	10.4189	0.758918	0.723835	0.854105	128.596	86.7728	140.34	4.90487	-0.420247	37.3183	4.42719	101.48	10.4189	48.2056	114.72	124.888	9.37889	11.9214	59.8527	9.98999	9.31018	57.852	82.4102	84.857	82.7774	102.248	107.717
872	805	519	708	445	447	335	71	6	139	-0.179545	-0.380789	-0.256266	0.493075	-0.911801	0.444	0.637843	0.0858653	2035.5	-0.63518	8.91274	6.94515	7.64603	9.30248	0.860805	0.762888	0.790019	144.042	104.737	140.23	4.14082	-0.564146	35.7678	4.71375	124.476	9.30248	74.3792	101.692	110.35	8.03629	12.6733	52.0702	8.91274	7.63461	77.0201	121.398	116.019	107.793	94.8396	105.104
1280	1208	1083	1216	1069	1155	1089	236	62	692	-0.0443587	-0.0986812	-0.0633312	0.90111	-0.804636	0.177659	0.149929	0.0236646	-890.75	-0.398602	10.6736	10.2883	10.4921	10.6501	0.531245	0.562163	0.965886	92.2547	52.7886	139.12	6.17975	-0.353992	27.5791	3.75128	38.8249	10.6501	53.6996	40.813	42.106	10.2693	-9.6217	26.1093	10.6736	10.2249	52.5386	59.3628	44.6018	46.5916	52.7536	61.9691
888	769	535	605	473	481	452	79	11	258	-0.146838	-0.317909	-0.209589	1.06281	-0.897269	0.213415	0.290268	0.0916808	575	-0.594004	8.45769	7.67443	7.83517	9.16169	0.662115	0.597597	1.02051	62.9086	33.8275	136.17	4.29084	-0.527569	36.8868	3.23412	34.9359	9.16169	58.9429	35.9381	38.2643	8.11804	8.31552	41.3594	8.45769	7.79149	49.3806	67.8865	33.9679	32.2319	38.9045	54.2651
1194	1088	903	1025	821	856	763	130	14	449	-0.0524476	-0.144661	-0.0748764	0.769988	-0.880515	0.288431	0.269545	0.0527144	410	-0.421485	10.0826	9.1378	9.49492	10.2851	0.645967	0.660715	0.916561	101.989	60.752	135.21	5.0658	-0.374319	38.6228	3.93116	64.3768	10.2851	50.9198	69.095	73.3754	9.66561	7.42896	50.2402	10.0826	9.3637	59.7002	64.3846	55.9592	55.6824	69.2571	76.6102
784	650	399	532	382	387	317	67	11	142	-0.116084	-0.345756	-0.165669	0.550633	-0.896923	0.379913	0.57767	0.159115	1434.5	-0.549221	8.10284	6.81846	7.28736	8.66239	0.832837	0.72426	0.819635	109.614	67.5717	134.77	4.06155	-0.487817	43.7109	4.07307	77.223	8.66239	57.5767	77.945	81.9926	7.36192	11.278	42.4099	8.10284	7.25584	53.978	115.724	74.0053	69.0483	76.3248	90.8921
1078	973	1034	784	728	846	821	104	13	757	0.0105263	0.0409069	0.0150285	0.90625	-0.893114	0.16492	0.00829016	0.0157068	-2281.75	0.246777	9.22087	9.3637	9.4578	9.90918	0.202389	0.548392	0.967719	36.0168	23.1065	134.37	4.70267	0.219159	90.5572	2.84825	24.9536	9.90918	55.3008	26.898	24.5227	10.1121	-13.1651	22.6562	9.22087	8.99588	39.079	-35.2786	22.1586	22.7617	23.1888	-20.8793
782	701	447	635	382	351	231	146	10	191	-0.173228	-0.379921	-0.247231	0.901587	-0.791726	0.245059	0.42335	0.101959	1064	-0.627626	8.59524	6.13579	7.054	8.88327	0.750873	0.625783	0.966057	178.904	152.999	128.38	5.26564	-0.557451	23.3088	5.34847	173.602	8.88327	75.4757	143.53	166.388	7.64603	10.2089	42.1282	8.59524	7.25584	78.0033	133.992	176.277	164.38	100.308	108.643
818	744	446	699	406	397	281	65	7	79	-0.161458	-0.395872	-0.230434	0.403727	-0.912634	0.605985	0.702517	0.122047	2158.25	-0.613078	8.87481	6.54991	7.3496	9.06131	0.888967	0.846228	0.739087	174.541	146.373	127.28	4.02073	-0.544528	39.2212	5.27011	173.651	9.06131	75.5588	143.376	157.748	7.64032	12.9231	49.4146	8.87481	7.40472	85.806	163.58	167.19	155.813	101.03	104.111
3034	2832	2894	3076	3455	3800	4059	938	13	2075	0.080394	0.0911425	0.114795	0.994118	-0.668785	0.242009	-0.0882164	0.0528555	-8748.25	0.486005	14.5433	15.9517	15.6049	14.1481	-0.44516	0.623176	0.998035	47.8843	27.0532	126.71	9.78891	0.431593	17.4804	3.00197	24.2649	14.1481	18.353	24.2421	20.6034	14.2506	-20.6051	32.361	14.5433	15.1176	32.3219	33.2219	22.5132	23.6332	22.952	27.5253
1007	843	642	716	565	582	515	140	45	260	-0.104991	-0.236977	-0.149873	0.753846	-0.833926	0.333333	0.365182	0.0864461	959	-0.531179	8.94618	8.01559	8.34913	9.44661	0.714776	0.693361	0.910111	75.657	41.1335	122.01	5.19249	-0.471757	30.0783	3.45196	44.0157	9.44661	43.3376	49.1508	51.6661	8.62671	9.86142	49.1682	8.94618	8.26703	52.6609	62.785	39.5987	38.3604	46.8331	58.593
752	670	417	598	347	338	244	67	7	113	-0.213974	-0.425532	-0.305364	0.566667	-0.9	0.409922	0.62819	0.101293	1689.75	-0.673399	8.42494	6.2488	6.96582	8.75034	0.85644	0.742849	0.827515	148.315	110.077	119.82	4.06155	-0.598118	33.8277	4.79254	129.184	8.75034	76.8774	101.473	110.661	7.471	11.9108	45.1065	8.42494	7.02711	79.7109	136.935	126.84	116.844	85.331	96.9887
850	705	509	586	396	408	340	96	7	193	-0.207592	-0.357074	-0.296291	0.826347	-0.86383	0.267552	0.437309	0.075386	1101.75	-0.666663	8.36821	6.97953	7.41686	8.90013	0.759037	0.644371	0.938399	86.7789	48.6754	118.82	4.57886	-0.592111	27.8591	3.65121	53.3135	8.90013	52.1846	56.3998	59.5712	7.98434	10.3283	45.316	8.36821	7.34342	62.8002	73.1472	51.5227	47.5621	54.9	68.0011
1103	1090	711	900	676	754	588	98	7	239	-0.0651685	-0.271879	-0.0930308	0.491987	-0.910092	0.446118	0.560487	0.0968561	2318.75	-0.453116	9.65489	8.37772	9.10173	10.2914	0.824496	0.7641	0.789438	144.004	104.689	117.39	4.61044	-0.40242	42.7729	4.71304	125.582	10.2914	72.6357	105.518	112.248	8.92531	13.2358	60.4507	9.65489	8.77638	63.8817	97.1012	108.354	102.776	110.214	116.335
792	613	425	493	399	406	368	81	10	181	-0.0883483	-0.265222	-0.126092	0.831461	-0.867863	0.325885	0.348735	0.149149	681.25	-0.501452	7.89979	7.1661	7.40472	8.49481	0.70388	0.688158	0.940331	67.8017	36.4626	112.51	4.32675	-0.445382	43.3991	3.31601	38.0605	8.49481	41.1736	42.5139	45.412	7.51847	8.79904	37.4426	7.89979	7.36192	41.3435	76.2013	38.1456	36.3756	44.2569	60.7575
3268	2958	2864	2895	3025	3072	3058	474	16	2536	0.143541	0.127691	0.204963	0.964435	-0.839757	0.202516	-0.109841	0.106396	-10850	0.589601	14.2522	14.5148	14.537	14.3549	-0.47891	0.587245	0.988002	84.4713	47.0211	112.47	7.79697	0.52359	42.7721	3.60937	24.9799	14.3549	16.5124	25.137	28.1043	14.2012	-22.1382	32.5394	14.2522	14.4624	40.0738	27.3957	31.9394	35.7238	29.5234	29.4564
835	736	480	597	400	425	334	74	11	164	-0.165049	-0.362963	-0.235567	0.747093	-0.899457	0.354331	0.482377	0.102384	1379	-0.617596	8.42025	6.93823	7.51847	9.02871	0.784264	0.707625	0.907385	114.829	72.5311	112.14	4.19834	-0.548534	36.3462	4.17037	83.0253	9.02871	67.0865	74.9201	80.0185	7.82974	11.1307	46.1303	8.42025	7.36806	64.2637	95.1481	79.2682	73.0264	74.0364	87.3739
1321	1223	1204	1398	1398	1606	1794	562	16	1696	0.0379545	0.0301348	0.0541897	1.77752	-0.540474	-0.132554	-0.307475	0.0421639	-9332.75	0.378418	11.1816	12.1509	11.7107	10.694	-0.674947	-0.509876	1.21136	92.2889	52.8151	109.04	8.25237	0.336063	31.6556	3.75191	27.706	10.694	48.0567	29.9283	31.0948	10.6384	-21.0541	23.4522	11.1816	11.1816	40.8345	66.3558	41.8113	46.503	40.8218	55.2135
1154	1096	849	974	798	834	763	140	11	455	-0.108355	-0.232153	-0.154688	0.806735	-0.872263	0.200351	0.330905	0.0393211	758	-0.536808	9.91257	9.1378	9.41287	10.3103	0.691673	0.585146	0.930916	89.3341	50.5619	108.72	5.19249	-0.476742	29.7248	3.69778	54.4695	10.3103	61.5107	53.1039	56.0152	9.46897	9.11779	53.104	9.91257	9.27544	55.959	67.9132	45.6088	45.2998	55.4876	66.9205
735	498	337	342	370	403	365	89	5	113	-0.00898204	-0.201448	-0.0128181	0.522659	-0.821285	0.490991	0.484352	0.225287	906.5	-0.234032	6.99319	7.14657	7.38644	7.92641	0.785333	0.788905	0.805513	35.8742	23.0666	108.4	4.46475	-0.20787	61.0697	2.84661	23.6461	7.92641	15.5119	22.9138	26.9966	6.95894	9.67808	34.4619	6.99319	7.17905	14.1068	41.5367	26.2267	25.8789	29.4362	36.6188
853	669	492	580	424	415	333	98	11	129	-0.174224	-0.318227	-0.248665	0.549133	-0.853513	0.456842	0.557625	0.0984883	1474.75	-0.628837	8.33955	6.9313	7.45904	8.74598	0.82309	0.770174	0.818891	92.2269	52.767	108.4	4.61044	-0.558517	30.2023	3.75077	59.2438	8.74598	39.2843	69.4753	74.4302	7.89445	11.3825	47.3511	8.33955	7.51257	54.6856	79.9307	55.3747	52.4299	63.1945	76.1296
777	519	323	347	282	279	222	49	7	40	-0.196296	-0.410326	-0.280089	0.331797	-0.905588	0.688716	0.756345	0.212195	1623.75	-0.654283	7.02711	6.05505	6.53434	8.03629	0.911115	0.883107	0.692295	41.5435	24.7903	107.16	3.65931	-0.581171	41.2263	2.91582	25.5	8.03629	8.49341	24.9905	27.742	6.86121	11.7537	38.9739	7.02711	6.55767	32.8998	56.6966	29.5647	26.9914	31.8923	45.0122
844	801	580	756	500	540	425	86	10	184	-0.137255	-0.290894	-0.195918	0.575	-0.892634	0.410256	0.519924	0.0507365	1576	-0.580797	9.10977	7.51847	8.14325	9.28704	0.804106	0.743051	0.831552	136.635	95.8599	107.1	4.414	-0.515833	36.2055	4.57663	111.837	9.28704	82.8058	78.7545	84.2878	8.33955	11.6373	51.6506	9.10977	7.93701	73.3932	107.393	103.455	97.9246	105.279	113.113
914	707	438	462	416	454	365	64	8	78	-0.106061	-0.332705	-0.151373	0.412429	-0.909477	0.638889	0.657679	0.182836	1941	-0.532945	7.73061	7.14657	7.68573	8.90854	0.869637	0.861275	0.74436	59.4466	32.0904	106.89	4	-0.473353	45.974	3.17779	34.3821	8.90854	31.75	39.0465	41.9948	7.59436	12.4741	47.7544	7.73061	7.46502	31.4363	50.1734	33.385	31.2562	37.5657	46.6893
2815	2667	2765	2826	3119	3387	3690	1253	143	2529	0.0853457	0.103228	0.121865	1.04724	-0.530184	0.129432	-0.126004	0.048684	-10851	0.495785	14.1381	15.4529	15.0178	13.8678	-0.501335	0.505841	1.01551	22.2073	20.0741	104.49	10.7808	0.440278	11.9609	2.71777	27.1199	13.8678	20.398	28.7792	23.7092	14.0356	-22.1389	32.4908	14.1381	14.6107	34.3689	28.951	21.3913	21.6108	22.5225	24.9096
829	586	389	386	339	343	292	58	10	145	-0.144118	-0.336374	-0.205671	0.810997	-0.901024	0.334862	0.425791	0.18019	928.5	-0.590279	7.28108	6.63429	7	8.36821	0.752313	0.69442	0.932552	42.9284	25.2544	102.99	3.87088	-0.524291	43.3278	2.9339	25.9527	8.36821	17.3612	26.7438	29.7497	7.29989	9.75575	37.8653	7.28108	6.97268	29.6117	34.758	28.6527	26.6653	31.6869	35.0238
944	770	479	574	583	586	532	80	10	203	-0.00104493	-0.233974	-0.0014915	0.709205	-0.896104	0.403818	0.388638	0.194958	1046.25	-0.114255	8.31069	8.10284	8.36821	9.16566	0.729763	0.739143	0.891779	87.6899	49.3414	102.29	4.30887	-0.101476	73.0766	3.66778	53.9563	9.16566	41.6284	61.7607	57.4168	7.82429	10.1518	43.516	8.31069	8.3539	26.5274	84.6604	47.873	47.4043	58.4059	73.5172
6724	6781	7441	7455	7716	8000	8193	2975	25	4476	0.0143718	0.0607383	0.0205224	0.80726	-0.561274	0.262238	0.0462084	-0.0170858	-11827.5	0.273785	19.5351	20.1596	20	18.9277	0.358845	0.640077	0.931118	78.9147	43.2299	101.59	14.3823	0.243129	41.4981	3.50963	23.6904	18.9277	31.7141	24.7516	27.5459	19.5229	-22.7841	15.2153	19.5351	19.7605	24.3673	28.171	36.1292	36.4853	42.6792	40.1941
870	599	405	391	330	331	289	73	7	102	-0.182482	-0.362912	-0.260421	0.564286	-0.87813	0.465969	0.582563	0.173469	1413.5	-0.638595	7.31238	6.61149	6.9174	8.42964	0.835182	0.775269	0.826354	20.3219	19.7903	100.66	4.17934	-0.567205	34.9724	2.7049	20.0119	8.42964	8.28072	15.69	17.0909	7.39864	11.2227	42.5951	7.31238	6.91042	32.7847	27.3459	24.51	22.7545	26.5801	27.1493
811	679	499	614	458	458	360	75	9	126	-0.135381	-0.282342	-0.19323	0.468421	-0.889543	0.501976	0.584597	0.0881681	1562.5	-0.578129	8.49942	7.11379	7.70824	8.78935	0.836153	0.794745	0.776626	111.102	68.9625	99.28	4.21716	-0.513475	39.1385	4.10082	79.3598	8.78935	57.4811	80.2299	85.4058	7.93171	11.604	48.2605	8.49942	7.70824	54.2799	91.8946	73.1273	70.0656	84.3715	94.9579
758	516	316	297	242	258	206	70	10	73	-0.192453	-0.413699	-0.274601	0.607477	-0.864341	0.491289	0.597523	0.21197	1289.75	-0.649981	6.67194	5.90594	6.3661	8.02078	0.842271	0.789064	0.846922	23.7897	20.3365	99.21	4.12129	-0.577353	34.8671	2.72955	20.6538	8.02078	14.5227	18.0139	19.4318	6.81128	10.8852	36.1563	6.67194	6.23168	29.2155	22.3351	26.8149	23.7678	27.4277	24.9723
825	767	463	622	425	449	349	81	15	105	-0.138991	-0.373321	-0.198375	0.46	-0.894394	0.538462	0.653017	0.118515	2047.75	-0.583216	8.53618	7.04058	7.65741	9.15374	0.867577	0.813551	0.771944	122.504	80.2653	98.89	4.32675	-0.517999	37.2107	4.31363	94.8597	9.15374	79.8547	70.6436	75.217	7.73619	12.6987	49.6156	8.53618	7.51847	63.5213	117.473	87.5897	81.1025	81.1967	94.6292
766	673	451	528	348	367	295	114	8	145	-0.188406	-0.372069	-0.268892	0.626623	-0.830609	0.359823	0.554273	0.0870445	1444.25	-0.645445	8.08248	6.65693	7.1596	8.76338	0.821437	0.711262	0.855728	84.6814	47.1698	97.95	4.84881	-0.573277	26.3359	3.61317	52.3069	8.76338	72.3909	45.8092	47.4664	7.66877	11.3035	45.2089	8.08248	7.03385	62.0004	78.4665	51.2511	46.4303	50.8483	66.3275
1067	940	718	820	659	689	596	109	22	307	-0.102919	-0.233596	-0.146919	0.739726	-0.884043	0.310887	0.370262	0.0696469	1041.75	-0.527667	9.3599	8.41554	8.83228	9.79586	0.718075	0.677435	0.904393	95.8237	55.6115	97.82	4.77686	-0.468631	35.2593	3.81699	61.4298	9.79586	50.7912	65.9152	70.2104	8.9545	10.1373	52.2491	9.3599	8.70219	54.065	68.3496	53.1935	51.9127	64.4319	74.0149
3831	3659	4073	4375	4641	4984	5147	1323	47	2955	-0.0138146	0.0397586	-0.0197261	1.05225	-0.638426	0.145583	-0.0651507	-0.0221469	-11156.8	-0.270197	16.3553	17.2657	17.0815	15.4095	-0.402383	0.526062	1.01712	62.6131	33.6751	97.35	10.9779	-0.239945	28.1604	3.22926	23.1601	15.4095	19.1705	22.6563	22.4561	15.97	-22.3449	30.8706	16.3553	16.6803	34.8137	27.3651	26.5051	27.406	28.8821	28.9419
4142	4200	4262	4561	4974	5238	5491	1314	17	4273	0.06994	0.0772273	0.0998696	1.01999	-0.687143	0.0686574	-0.0870558	0.0296545	-16180.5	0.463957	16.5839	17.6421	17.3669	16.1343	-0.443199	0.409477	1.00662	74.3284	40.3053	97.19	10.953	0.412011	12.1027	3.42863	21.7489	16.1343	17.6512	20.2726	13.7176	16.2133	-25.2928	31.2926	16.5839	17.0701	30.8544	26.2842	29.4579	31.4177	31.2311	30.1716
928	911	646	803	514	517	374	87	10	93	-0.198516	-0.356664	-0.283368	0.375	-0.904501	0.645714	0.698043	0.025641	2632.25	-0.656826	9.29477	7.20483	8.02596	9.69407	0.887076	0.864331	0.721125	134.941	93.8982	95.8	4.43105	-0.583353	30.3391	4.54519	113.579	9.69407	83.3952	79.099	85.4246	8.64459	13.8073	60.0574	9.29477	8.0104	79.363	92.9093	100.671	93.7656	91.6177	100.845
853	609	388	431	334	317	276	83	21	104	-0.188361	-0.393593	-0.268804	0.550943	-0.863711	0.436314	0.613245	0.18057	1499.75	-0.645375	7.55369	6.51083	6.81846	8.47629	0.849594	0.758461	0.819789	45.6795	26.2263	95.29	4.36207	-0.573232	32.052	2.97106	27.1426	8.47629	17.8353	28.6311	29.8043	7.29363	11.4465	42.2379	7.55369	6.93823	41.7076	64.7765	29.6231	27.2163	32.2746	48.2603
1097	984	905	958	874	934	924	264	11	648	-0.074184	-0.115646	-0.105908	1.10897	-0.731707	0.092437	0.0643591	0.018172	-1501	-0.473125	9.85799	9.73996	9.77497	9.94638	0.400747	0.452149	1.03508	52.4052	28.8827	95.25	6.41507	-0.420181	22.2187	3.06817	25.7759	9.94638	52.8824	27.7627	26.2524	9.67274	-11.4497	21.2325	9.85799	9.56101	44.3419	45.9984	25.0321	26.6342	25.6473	35.8053
2734	2699	2970	2960	3124	3357	3541	862	21	3117	0.0479243	0.0955094	0.0684313	1.39431	-0.680622	0.0238021	-0.256166	0.00527506	-16825	0.409027	14.3581	15.242	14.9733	13.923	-0.635098	0.287655	1.11717	51.1018	28.3368	94.7	9.51705	0.363233	19.6759	3.04872	23.1898	13.923	24.2575	23.3301	20.394	14.3743	-25.6243	33.7251	14.3581	14.6185	38.8792	25.69	22.2451	24.0531	21.222	22.0969
2101	2081	2035	2243	1955	2053	1954	343	12	1302	-0.0380005	-0.0491555	-0.0542588	0.900318	-0.835175	0.183187	0.10135	-0.0103016	-2520	-0.378579	13.0901	12.5019	12.7095	12.7671	0.466238	0.567934	0.965603	107.445	65.5804	93.91	7	-0.336199	22.2926	4.03266	42.5988	12.7671	34.7775	49.5178	51.0241	12.6723	-13.6082	32.2556	13.0901	12.504	63.0849	45.1827	50.2058	53.8115	57.1813	59.89
754	526	287	285	273	282	225	44	7	31	-0.121094	-0.400799	-0.172777	0.382222	-0.91635	0.757812	0.718954	0.260786	1618.5	-0.556966	6.58084	6.0822	6.55767	8.07226	0.895847	0.911704	0.725725	26.9195	20.9203	93.49	3.53035	-0.494736	51.7537	2.75543	21.1298	8.07226	20.5422	19.7946	24.0013	6.5962	11.741	36.3094	6.58084	6.48715	18.0575	36.9704	26.5122	24.061	28.223	33.4721
1605	1488	1537	1548	1517	1634	1677	268	10	1435	0.0417706	0.0579297	0.0596404	1.16996	-0.819892	0.075982	-0.135638	0.031811	-6232	0.390703	11.568	11.8808	11.7783	11.4165	-0.513799	0.423549	1.05372	65.8248	35.3726	90.96	6.44731	0.346969	60.4836	3.28263	24.8866	11.4165	37.6596	26.6481	30.2413	11.5405	-18.4025	27.3306	11.568	11.4902	44.0656	29.9286	26.5335	29.5217	24.24	26.7584
822	704	586	682	481	515	378	69	7	134	-0.181452	-0.268468	-0.259001	0.482759	-0.901989	0.503704	0.564444	0.0233333	1562	-0.637432	8.80227	7.23043	8.01559	8.89592	0.826432	0.795655	0.784471	125.015	82.9084	90.89	4.10157	-0.566135	36.1343	4.36047	96.2794	8.89592	61.6928	93.1718	100.504	8.36821	11.6027	51.7807	8.80227	7.83517	62.9863	75.2195	88.8044	85.2593	100.841	105.073
927	813	603	780	568	584	458	109	9	174	-0.106422	-0.250769	-0.151911	0.558522	-0.865929	0.473525	0.498618	0.0793893	1563.75	-0.533576	9.20516	7.70824	8.35868	9.33319	0.792968	0.779437	0.823531	137.957	97.4096	90.49	4.77686	-0.47389	34.8503	4.60116	113.618	9.33319	58.8836	114.795	125.937	8.44836	11.6071	52.4125	9.20516	8.28164	63.4226	104.88	103.061	99.4291	116.919	122.402
1095	1026	784	879	795	847	780	148	38	376	-0.0377234	-0.170565	-0.0538537	0.700138	-0.85575	0.318223	0.336808	0.0749263	852.25	-0.377635	9.57921	9.20516	9.46152	10.0859	0.695762	0.682722	0.887962	78.1718	42.7436	89.71	5.28957	-0.33538	38.4772	3.49642	45.6473	10.0859	62.1443	44.8034	47.611	9.22087	9.48103	52.3989	9.57921	9.2638	43.6167	62.5217	37.8348	38.3138	44.9536	57.0634
865	669	444	530	384	393	292	68	7	83	-0.182423	-0.370902	-0.260352	0.403909	-0.898356	0.574359	0.687264	0.137864	1875	-0.638539	8.09267	6.63429	7.32483	8.74598	0.882486	0.831243	0.739199	100.831	59.7607	89.05	4.08166	-0.567144	36.3216	3.90966	68.9161	8.74598	35.2068	84.5411	90.7261	7.62888	12.3311	47.6604	8.09267	7.26848	53.029	83.953	64.6937	60.0373	67.2623	80.1668
5786	5222	4910	4461	4857	5225	5338	822	13	2141	0.0827573	0.0520966	0.118173	0.63354	-0.842589	0.460501	0.174275	0.0823288	-1136.75	0.490726	16.4618	17.4767	17.3525	17.3492	0.558571	0.772225	0.858865	46.7999	26.6411	88.33	9.36751	0.435782	20.9585	2.98665	25.3854	17.3492	42.7157	27.3906	25.4269	16.9965	-10.4365	31.6503	16.4618	16.9352	31.4203	30.8539	25.8977	28.0273	25.7228	28.3944
842	667	425	458	348	348	297	56	12	160	-0.185495	-0.391032	-0.264729	0.65411	-0.916042	0.292035	0.554779	0.143145	1391	-0.642097	7.70824	6.67194	7.03385	8.73726	0.821687	0.663456	0.868061	56.9301	30.8939	87.81	3.82586	-0.57031	39.7277	3.13779	32.5474	8.73726	42.4026	35.7721	38.395	7.51847	11.1629	43.5105	7.70824	7.03385	44.8828	56.108	33.7136	30.5882	35.8734	47.7939
868	680	472	521	391	391	320	77	6	124	-0.177057	-0.346535	-0.252703	0.575758	-0.886765	0.453744	0.563218	0.118581	1536.5	-0.632223	8.0466	6.8399	7.31238	8.79366	0.825833	0.768429	0.831917	71.0525	38.3297	87.74	4.25432	-0.561528	34.4576	3.37167	41.6449	8.79366	37.8995	47.5938	50.3346	7.78599	11.5392	46.854	8.0466	7.31238	49.3219	62.0181	40.2924	37.3754	44.6128	56.6281
1827	1655	1495	1548	1470	1493	1473	1078	1008	1302	-0.0303239	-0.0809928	-0.0432962	0.988628	-0.34864	0.0387597	0.086671	0.0392031	-2876.25	-0.351142	11.568	11.378	11.4293	11.8286	0.442546	0.338423	0.996195	44.5513	25.8196	87.58	10.2535	-0.311838	23.9615	2.95563	24.956	11.8286	27.7983	26.1666	25.0201	11.4344	-14.2214	28.2425	11.568	11.3703	47.5044	36.2575	20.7919	22.8231	18.593	25.7882
949	911	613	801	495	517	381	94	10	131	-0.193768	-0.375094	-0.276586	0.47343	-0.896817	0.519266	0.64589	0.0529162	2396.25	-0.651543	9.28704	7.2495	8.02596	9.69407	0.864409	0.803767	0.779385	144.184	104.911	87.15	4.54684	-0.578665	29.3274	4.71636	126.152	9.69407	76.991	98.7811	108.617	8.49481	13.3817	57.7058	9.28704	7.91046	83.5896	107.655	114.318	105.964	91.8858	102.52
902	647	465	486	423	439	383	120	11	255	-0.0751445	-0.235912	-0.107253	0.9425	-0.814529	0.221374	0.263672	0.166667	278.75	-0.47512	7.86222	7.26217	7.60014	8.64904	0.641241	0.604935	0.980454	61.405	33.0601	86.15	4.93242	-0.421987	36.8293	3.20948	33.4658	8.64904	15.4424	38.5109	40.933	7.74731	6.53238	34.0754	7.86222	7.50666	35.0923	47.3525	34.188	32.7475	39.5456	47.0105
1005	900	651	795	578	605	501	104	10	243	-0.143108	-0.29683	-0.204281	0.706967	-0.884444	0.335157	0.445783	0.0683363	1429.75	-0.588947	9.2638	7.94229	8.45769	9.65489	0.763908	0.694624	0.89084	115.229	72.9218	85.66	4.70267	-0.523064	31.9175	4.17785	83.6937	9.65489	58.13	84.1157	90.9966	8.66683	11.2656	53.1407	9.2638	8.32995	64.1439	87.8357	74.3652	70.8738	84.0748	94.0645
1435	1427	1333	1470	1349	1456	1478	343	121	1006	-0.0414062	-0.075358	-0.0591182	1.15648	-0.759636	0.09897	0.00281096	-0.000750751	-3041.25	-0.38956	11.3703	11.3909	11.3341	11.2583	0.14113	0.46256	1.04965	55.0867	30.0528	83.93	7	-0.345957	21.8922	3.10906	25.3575	11.2583	56.4835	27.2518	25.5755	11.0055	-14.4883	26.368	11.3703	11.0494	50.7065	52.1447	23.4858	25.8066	21.7409	35.5631
784	554	396	379	332	328	294	60	6	128	-0.185629	-0.341404	-0.264908	0.643382	-0.891697	0.36	0.51989	0.142857	1096	-0.642242	7.2368	6.6494	6.89643	8.21303	0.804089	0.711379	0.863289	19.0672	19.6188	83.5	3.91487	-0.570447	38.4015	2.69706	20.0396	8.21303	20.9101	18.2298	20.4936	7.34342	10.3103	39.6896	7.2368	6.92436	29.4166	25.2564	24.3564	22.9927	26.7037	26.0788
1390	1307	1189	1240	1108	1178	1137	218	45	758	-0.0625559	-0.109508	-0.0893127	0.956149	-0.833206	0.16104	0.131602	0.0126635	-1130.75	-0.446997	10.7434	10.4373	10.5612	10.9335	0.508652	0.544058	0.985164	65.5179	35.2065	83.05	6.01846	-0.396968	26.6215	3.27749	28.3226	10.9335	48.0676	30.5945	30.6456	10.594	-10.4181	27.0861	10.7434	10.3478	51.0478	39.9011	28.3386	30.0629	30.1179	36.3599
959	811	568	608	455	473	398	91	17	187	-0.177202	-0.342715	-0.252932	0.662469	-0.887793	0.359589	0.510242	0.0882825	1578.5	-0.632414	8.47165	7.35576	7.79149	9.32553	0.799083	0.711108	0.871743	68.0151	36.5823	82.49	4.49794	-0.561681	31.3127	3.31963	39.5648	9.32553	48.6386	42.7487	44.8003	8.28164	11.6434	51.2118	8.47165	7.69137	53.6985	52.5013	37.0491	34.3608	41.1132	50.3688
6862	6800	7429	7513	7655	7917	8136	3308	40	5198	0.0212766	0.0654206	0.0303821	0.89306	-0.513529	0.19722	-0.00896305	-0.00827904	-16724.5	0.312037	19.5856	20.1127	19.9306	18.9454	-0.207723	0.582081	0.963001	55.7142	30.3358	82.04	14.9001	0.277098	46.407	3.11878	22.6036	18.9454	37.9198	23.8493	27.2917	19.5124	-25.5732	16.2957	19.5856	19.7083	26.6285	25.7988	34.2373	32.4316	39.158	36.1238
757	537	364	363	350	368	334	122	50	172	-0.0769231	-0.265018	-0.109777	0.814103	-0.772812	0.289256	0.357775	0.189761	581	-0.478817	7.13349	6.93823	7.1661	8.12814	0.70991	0.661344	0.933741	28.8015	21.3128	81.3	4.95968	-0.42529	36.2319	2.77255	22.0441	8.12814	24.1417	21.6639	23.4796	7.14004	8.34434	32.8707	7.13349	7.0473	22.0641	36.4978	25.242	24.2249	28.0548	33.1069
994	965	718	805	611	644	584	117	12	329	-0.170334	-0.309362	-0.243152	0.854617	-0.878756	0.214797	0.378571	0.0227969	1088	-0.624156	9.30248	8.35868	8.63566	9.88195	0.723407	0.598884	0.94898	75.9985	41.3488	80.18	4.89097	-0.554329	27.3242	3.45797	44.5392	9.88195	76.1556	38.5666	39.5751	8.9545	10.2851	52.6316	9.30248	8.48556	59.7286	63.313	39.0414	37.485	45.7207	57.9214
1044	981	777	853	677	711	668	223	17	388	-0.106838	-0.220149	-0.152518	0.907496	-0.772681	0.235468	0.265806	0.0362791	424.25	-0.534285	9.48381	8.74162	8.92531	9.93626	0.642967	0.61751	0.968162	61.8694	33.295	79.66	6.06413	-0.474506	21.8366	3.21706	34.0637	9.93626	65.8949	33.8252	32.9682	9.19335	7.51405	47.4155	9.48381	8.78071	56.3445	56.9375	30.4572	30.1718	35.1499	47.5659
898	692	442	484	425	439	354	73	10	88	-0.0846626	-0.299531	-0.120835	0.474531	-0.894509	0.618221	0.592635	0.179582	1724.75	-0.494383	7.85142	7.07404	7.60014	8.84509	0.839968	0.851886	0.779988	71.1922	38.412	78.72	4.17934	-0.4391	46.2014	3.37408	41.9919	8.84509	32.0007	49.3016	52.1478	7.61741	11.9925	46.6274	7.85142	7.51847	34.311	60.2155	39.5762	37.3157	45.2274	56.4624
2397	2431	2181	2249	2040	2082	2051	1233	1030	1696	-0.0361045	-0.0901345	-0.051552	0.950222	-0.492801	0.089396	0.115393	0.00728266	-3159.25	-0.372176	13.1018	12.7054	12.7691	13.4461	0.486848	0.447136	0.983124	49.4513	27.667	78.16	10.7231	-0.330512	27.9764	3.0245	25.02	13.4461	31.4947	26.5045	26.5483	12.9684	-14.6733	32.3124	13.1018	12.6827	57.3741	32.1653	21.1541	23.5954	18.0102	23.2092
1020	1023	952	1054	1834	2295	2433	426	7	949	0.407038	0.3766	0.581173	0.856574	-0.583578	0.408354	-0.308316	0.26529	-6822.5	0.834517	10.1769	13.4497	13.1905	10.0761	-0.675563	0.7419	0.949704	45.3897	26.1207	78.13	7.52437	0.741103	54.5855	2.96707	24.5893	10.0761	81.1786	24.9685	28.8433	9.83737	-18.9662	19.1563	10.1769	12.2405	14.3429	57.2227	20.5587	24.4758	11.8788	30.3986
6285	6603	7490	7755	8094	8418	8655	2832	19	3613	-0.0588817	0.0040724	-0.0840806	0.825447	-0.571104	0.296397	0.0915854	-0.072989	-7168	-0.438092	19.7937	20.5316	20.3424	18.7606	0.450757	0.666742	0.938058	69.6591	37.518	77.72	14.1481	-0.389039	87.0088	3.3477	24.8253	18.7606	17.7428	25.0355	24.3912	19.5656	-19.2811	14.6025	19.7937	20.078	21.4739	19.7405	35.8459	33.8371	40.9215	34.0985
983	879	655	790	575	588	488	127	24	289	-0.0916667	-0.234551	-0.130853	0.759633	-0.855518	0.306954	0.359629	0.0768147	929	-0.507686	9.24434	7.87299	8.37772	9.57921	0.711134	0.674566	0.912434	116.38	74.0525	77.3	5.02653	-0.45089	33.5032	4.19933	82.8231	9.57921	59.2582	82.1656	88.5328	8.68455	9.7575	49.3317	9.24434	8.31552	63.8402	84.2888	75.7418	72.4118	86.4071	95.2711
811	782	493	639	411	410	321	82	7	150	-0.199513	-0.407741	-0.284757	0.708207	-0.895141	0.373695	0.540887	0.0724365	1701.25	-0.657897	8.61325	6.84702	7.42896	9.21303	0.814771	0.720287	0.89136	121.108	78.82	76.18	4.34448	-0.584329	31.334	4.28758	91.8743	9.21303	89.2079	57.6282	61.1277	7.89979	11.9378	48.9012	8.61325	7.43499	70.8374	106.814	86.3736	79.2265	74.7736	89.2323
1589	1675	1383	1294	1091	1142	1131	262	7	752	-0.062212	-0.156768	-0.0888241	0.798526	-0.843582	0.237709	0.264151	0.00789096	426.75	-0.44618	10.8971	10.4189	10.4525	11.876	0.641629	0.619463	0.927747	15.7135	19.2283	75.97	6.39883	-0.39624	23.5524	2.67905	20.3411	11.876	59.8627	22.6708	21.0259	11.1414	7.52878	58.0539	10.8971	10.2946	58.6248	13.8749	18.8523	20.2197	17.3128	11.9978
1234	1185	920	996	822	865	827	113	10	435	-0.135802	-0.257294	-0.193875	0.788571	-0.904641	0.23348	0.364421	0.0249073	1160.75	-0.578771	9.98665	9.38646	9.52808	10.5821	0.714279	0.615767	0.923876	60.2755	32.4967	75.83	4.83459	-0.514007	31.0426	3.19115	34.2258	10.5821	59.4125	35.1973	36.6039	9.72589	10.5094	58.2457	9.98665	9.36751	55.6431	51.7055	28.2762	28.443	32.0275	43.1078
1100	903	793	800	762	803	760	111	8	402	-0.0803815	-0.144487	-0.114751	0.844444	-0.877076	0.253482	0.226069	0.0562333	57.75	-0.485944	9.28318	9.12581	9.29477	9.66561	0.609182	0.632872	0.9452	49.6644	27.7521	75.36	4.8059	-0.431571	37.7548	3.0276	27.7878	9.66561	33.8023	30.2331	32.5044	9.25602	3.86531	39.8098	9.28318	9.1338	37.1913	34.4468	25.0609	26.2267	26.4701	30.851
758	547	364	398	337	355	276	57	8	96	-0.116564	-0.31018	-0.166345	0.590278	-0.895795	0.5	0.525802	0.179256	1172	-0.549967	7.35576	6.51083	7.0807	8.17829	0.807125	0.793701	0.838852	76.1653	41.4544	75.27	3.8485	-0.48849	47.01	3.46091	44.8304	8.17829	28.0094	54.129	56.909	7.14004	10.5433	38.4141	7.35576	6.95894	32.9296	60.8201	45.152	42.3547	50.9841	61.1106
735	560	370	407	349	380	296	62	7	87	-0.116139	-0.313013	-0.165739	0.423208	-0.889286	0.542105	0.637427	0.162896	1431.5	-0.549298	7.4108	6.66444	7.24316	8.24257	0.860617	0.815382	0.750789	72.4327	39.1506	74.89	3.95789	-0.487894	45.3166	3.39557	42.4953	8.24257	42.64	47.5257	50.4157	7.17905	11.2702	40.7031	7.4108	7.04058	32.4707	62.3579	42.2749	39.7842	48.1457	59.4543
799	617	408	431	349	355	298	53	14	117	-0.170732	-0.362031	-0.243655	0.536332	-0.9141	0.423645	0.598446	0.142857	1454	-0.624586	7.55369	6.67942	7.0807	8.51324	0.842704	0.751048	0.812477	51.3757	28.4503	74.54	3.75629	-0.554759	42.2486	3.05278	29.714	8.51324	40.0585	32.5506	35.3785	7.41686	11.3289	43.0442	7.55369	7.04058	38.1608	50.9886	31.3366	28.9759	34.5442	44.7216
2014	1932	1698	1806	1637	1647	1575	1160	1008	1365	-0.0325327	-0.0967925	-0.0464506	0.937146	-0.399586	0.0764547	0.128834	0.0298529	-2387.5	-0.359471	12.1779	11.6348	11.8095	12.4548	0.505061	0.424425	0.978594	65.2979	35.0879	74.38	10.5072	-0.319232	25.9378	3.2738	27.0055	12.4548	32.392	29.1803	28.9146	11.9301	-13.3654	30.4146	12.1779	11.7855	55.0136	40.8009	25.9558	28.2519	25.3895	33.1864
1877	1934	1949	2035	1876	2061	2024	724	18	1488	-0.0312169	-0.0273572	-0.0445727	1.19388	-0.625646	0.103344	-0.061165	-0.0249803	-5557.75	-0.35456	12.6723	12.6494	12.726	12.4591	-0.394004	0.469277	1.06085	33.186	22.3482	72.78	8.97938	-0.314869	18.5745	2.81674	25.4073	12.4591	45.9892	27.4482	24.6772	12.4912	-17.7133	30.3275	12.6723	12.3333	54.201	35.5161	19.2948	21.2303	16.6707	23.9578
1970	1710	1534	1499	1445	1490	1463	1083	1009	1249	-0.0368368	-0.0909091	-0.0525953	0.970526	-0.366667	0.065819	0.105723	0.0505957	-2483	-0.37467	11.4446	11.3522	11.4216	11.9582	0.472849	0.403754	0.990077	25.6234	20.668	72.47	10.2693	-0.332731	24.3412	2.74431	25.2481	11.9582	18.275	25.745	24.6716	11.533	-13.5413	28.9643	11.4446	11.3055	45.4576	23.3548	18.8503	20.6174	16.4389	17.0936
997	797	619	652	555	595	599	161	12	321	-0.0709343	-0.194903	-0.101257	0.996276	-0.797992	0.251748	0.196697	0.106782	31	-0.466095	8.67127	8.42964	8.41083	9.27156	0.581566	0.631426	0.998757	30.5704	21.7101	72.09	5.44012	-0.413954	31.3307	2.78968	23.0545	9.27156	33.7832	24.0883	24.8395	8.52243	3.14138	33.1386	8.67127	8.21797	43.2524	47.5706	22.7607	22.7012	24.6072	35.7262
4538	4298	4518	4427	4448	4456	4491	1628	22	3037	0.0233463	0.0482728	0.033337	0.900718	-0.621219	0.218376	0.00397103	0.0128905	-9399.25	0.321842	16.4199	16.4986	16.4557	16.2588	0.158356	0.602192	0.965746	74.1684	40.2066	72	11.7639	0.285807	16.285	3.42583	24.2698	16.2588	23.0112	24.7637	20.7381	16.5316	-21.104	29.287	16.4199	16.4458	41.9797	26.4108	28.6278	31.453	27.817	27.5881
925	866	518	576	383	378	291	66	8	103	-0.263415	-0.482877	-0.37596	0.523179	-0.923788	0.491358	0.691406	0.0844012	2473.25	-0.72174	8.32034	6.62671	7.23043	9.53175	0.884255	0.789101	0.80578	79.0797	43.3385	71.56	4.04124	-0.641032	30.2435	3.51257	49.176	9.53175	73.3524	43.0294	44.9634	8.03113	13.5235	54.4375	8.32034	7.26217	63.9025	63.4691	45.9205	40.2785	40.5953	54.0715
1579	1481	1328	1456	1826	2082	2209	398	17	1193	0.184025	0.130869	0.262753	0.909704	-0.731263	0.235256	-0.0841064	0.137942	-4850.5	0.640495	11.3341	13.0236	12.7691	11.3986	-0.438137	0.617325	0.968947	60.6086	32.6617	70.4	7.35576	0.568799	52.2374	3.19654	25.0516	11.3986	40.5437	26.9496	30.5954	10.9917	-16.9276	25.4192	11.3341	12.2227	23.5541	50.8044	23.9592	27.5044	18.4823	32.5685
781	579	398	404	284	276	223	71	8	100	-0.26149	-0.426108	-0.373154	0.545064	-0.877375	0.399399	0.640227	0.120442	1474.75	-0.71994	7.39254	6.06413	6.51083	8.33476	0.861876	0.736437	0.816863	42.7087	25.1796	69.94	4.14082	-0.639467	29.1175	2.931	25.9359	8.33476	32.2183	27.7589	28.195	7.35576	11.3825	42.6342	7.39254	6.57314	48.1056	40.561	29.8656	26.6746	30.9078	37.2813
728	497	319	308	292	305	248	111	8	103	-0.14955	-0.356071	-0.213392	0.792373	-0.77666	0.39233	0.453216	0.203496	897.75	-0.597576	6.75331	6.28276	6.73132	7.9211	0.768131	0.732067	0.925358	32.9862	22.2973	68.89	4.8059	-0.530797	30.0847	2.8146	22.8567	7.9211	17.9149	22.0194	22.3238	6.83277	9.64684	33.1579	6.75331	6.63429	20.1093	29.0833	27.1789	25.3156	29.9364	30.6962
1247	1143	1111	1167	1146	1242	1310	412	183	909	-0.0301344	-0.0443125	-0.0430235	1.16061	-0.639545	0.0700767	-0.030123	0.0157254	-3045.25	-0.350403	10.5283	10.9418	10.7491	10.4556	-0.311147	0.412279	1.0509	2.25793	18.6568	68.57	7.44102	-0.311187	20.8967	2.65224	26.0026	10.4556	49.4898	28.069	26.1723	10.3571	-14.4946	23.2699	10.5283	10.4647	40.3069	42.2593	18.6144	20.2365	16.4335	27.1429
792	631	426	519	335	333	240	53	16	113	-0.229437	-0.405345	-0.327434	0.524345	-0.916006	0.405263	0.636835	0.10832	1586.5	-0.689247	8.03629	6.21447	6.9313	8.57715	0.860351	0.740024	0.806378	114.196	71.9165	68.47	3.75629	-0.612192	36.8126	4.15856	83.0484	8.57715	47.7963	92.9195	100.047	7.52437	11.6631	44.9084	8.03629	6.94515	63.4984	89.8504	81.0424	74.308	72.3693	85.2481
803	680	477	656	683	771	659	173	9	254	-0.0755355	-0.247706	-0.107813	1.10732	-0.745588	0.23494	0.199295	0.11952	103	-0.475945	8.68896	8.70219	9.16962	8.79366	0.584115	0.617048	1.03456	128.78	86.9751	68.11	5.57205	-0.422718	29.349	4.43062	89.0843	8.79366	60.7423	87.0085	94.7234	7.81339	4.68755	30.5963	8.68896	8.80657	26.8858	124.201	87.8554	90.353	112.827	119.13
764	551	360	356	315	360	287	66	6	116	-0.130298	-0.330918	-0.185941	0.610108	-0.880218	0.409669	0.530556	0.182283	1139.75	-0.570766	7.08734	6.5962	7.11379	8.19818	0.80955	0.742696	0.848143	49.8116	27.8112	68.08	4.04124	-0.506967	42.3012	3.02975	28.8343	8.19818	27.3408	31.566	34.4029	7.11379	10.4457	37.9124	7.08734	6.80409	27.4275	34.3838	31.5325	29.141	34.7383	37.1978
883	698	496	499	408	422	382	134	10	175	-0.168433	-0.328259	-0.240402	0.790368	-0.808023	0.337121	0.428864	0.109515	1106.5	-0.621793	7.93171	7.25584	7.50074	8.87058	0.754119	0.695978	0.924577	30.9747	21.8048	68.04	5.11723	-0.552259	25.1122	2.79373	22.2738	8.87058	38.8328	23.5168	22.4637	7.91578	10.3431	44.7832	7.93171	7.41686	40.7672	36.7856	24.6464	23.3192	27.1099	32.5275
902	776	509	559	409	422	328	70	9	107	-0.190643	-0.383244	-0.272102	0.5	-0.909794	0.527594	0.635406	0.1015	2031.25	-0.648004	8.23766	6.89643	7.50074	9.1894	0.859707	0.808041	0.793701	80.1386	44.0416	67.28	4.12129	-0.575538	35.0279	3.53146	49.4621	9.1894	56.4342	50.6138	53.6058	7.98434	12.6645	51.6167	8.23766	7.42291	53.5824	60.181	46.0041	41.922	47.8172	58.4406
975	802	553	632	502	522	480	119	17	242	-0.0961348	-0.27504	-0.137222	0.802632	-0.851621	0.30659	0.373288	0.128104	964.5	-0.515792	8.58168	7.82974	8.05175	9.29091	0.720026	0.674299	0.929335	66.0956	35.5198	67.28	4.91868	-0.4581	34.2829	3.28718	37.4858	9.29091	41.4726	41.77	44.0983	8.20808	9.88024	45.9829	8.58168	7.94757	48.9605	70.5854	35.093	33.4669	40.5067	56.3166
1953	1674	1439	1413	1341	1345	1272	1080	1008	1129	-0.0565345	-0.131463	-0.0807186	0.91284	-0.354839	0.064623	0.175975	0.058862	-1422	-0.432173	11.2214	10.835	11.0384	11.8737	0.560381	0.401294	0.970059	37.1527	23.4306	66.83	10.2599	-0.3838	24.9293	2.86151	24.8682	11.8737	16.5205	24.9631	23.9921	11.2898	-11.2452	29.524	11.2214	11.0275	46.3938	24.6139	19.922	21.6534	18.0618	19.0624
882	797	510	553	424	427	350	72	11	106	-0.169725	-0.375324	-0.242248	0.472376	-0.909661	0.547009	0.646694	0.0989399	2122	-0.623381	8.20808	7.0473	7.53025	9.27156	0.864768	0.817833	0.778806	63.7113	34.2453	66.43	4.16017	-0.553667	36.424	3.24738	37.2029	9.27156	68.8552	35.6429	37.9009	7.98957	12.8504	52.1814	8.20808	7.51257	48.9175	56.6977	35.3395	32.3587	38.2686	49.842
4123	4104	4143	4789	5622	6258	6749	2424	1016	5162	0.0733617	0.0780636	0.104755	1.17004	-0.409357	-0.0364421	-0.155469	0.0369596	-21439.2	0.471403	16.8558	18.8979	18.428	16.0104	-0.537709	-0.331539	1.05374	98.4261	57.7405	66.29	13.4331	0.418623	18.2781	3.86509	22.1476	16.0104	18.5767	21.0285	17.2509	16.061	-27.7803	33.0519	16.8558	17.7813	22.8135	28.048	39.3572	43.1444	40.5751	38.4641
763	571	422	442	391	412	356	68	7	183	-0.12234	-0.267481	-0.174603	0.706061	-0.880911	0.28655	0.420398	0.128549	766.25	-0.558921	7.61741	7.08734	7.44102	8.29619	0.749124	0.659275	0.890459	57.1801	31.0103	65.93	4.08166	-0.496428	42.6344	3.14173	32.1234	8.29619	35.9512	35.766	38.6176	7.50074	9.15075	38.1571	7.61741	7.31238	31.8707	48.5116	32.8595	31.7438	38.0949	46.3922
859	752	469	631	390	389	277	64	11	109	-0.213454	-0.424242	-0.304644	0.467105	-0.914894	0.472155	0.682327	0.107092	2064.25	-0.672869	8.57715	6.51868	7.29989	9.09367	0.880368	0.778684	0.775899	141.176	101.245	65.39	4	-0.597633	34.7117	4.66077	120.417	9.09367	63.6102	114.954	126.176	7.76946	12.7327	49.9967	8.57715	7.30614	74.7624	117.855	114.144	104.966	83.0611	96.0558
1111	1122	1115	1353	1779	2199	2521	284	8	1270	0.0132743	0.0101456	0.0189522	1.4917	-0.746881	-0.0517598	-0.207067	0.00579581	-6122.75	0.266616	11.0603	13.61	13.0039	10.3912	-0.591612	-0.372676	1.1426	75.244	40.8744	64.61	6.57314	0.236776	52.7631	3.44469	26.1401	10.3912	76.5416	26.406	30.1101	10.3695	-18.2943	22.1736	11.0603	12.1169	20.7115	78.9858	29.7238	35.9028	14.5755	39.8104
938	685	503	483	430	440	396	70	17	195	-0.164352	-0.309751	-0.234578	0.836565	-0.89781	0.298561	0.388045	0.127115	905.5	-0.616731	7.84601	7.34342	7.6059	8.81516	0.729391	0.668361	0.942251	31.1783	21.8531	64.38	4.12129	-0.547762	37.4893	2.79579	22.4013	8.81516	17.1604	21.2049	23.2842	7.95285	9.67452	43.375	7.84601	7.54784	33.1981	24.4477	24.3573	23.4337	26.9044	25.777
835	669	458	511	394	401	329	89	10	155	-0.133663	-0.313052	-0.19077	0.554286	-0.866966	0.386139	0.550406	0.128034	1386.25	-0.575666	7.99479	6.90344	7.3742	8.74598	0.819523	0.728195	0.821444	75.0261	40.7383	64.29	4.46475	-0.511294	35.9043	3.44086	44.351	8.74598	45.5311	48.9234	51.8354	7.70824	11.1501	45.1412	7.99479	7.33104	46.3998	65.1198	42.7921	39.8905	47.7665	60.0918
1575	1302	1146	1113	1287	1434	1504	396	14	738	0.0962145	0.0326895	0.137371	0.798561	-0.695853	0.306391	0.079602	0.12802	-1609	0.515979	10.3633	11.4573	11.2767	10.9195	0.430171	0.674153	0.927761	57.8774	31.3378	63.94	7.34342	0.458226	48.5688	3.15275	26.402	10.9195	17.5637	27.4603	30.9072	10.4647	-11.718	25.4527	10.3633	10.8774	26.3026	22.8788	24.5598	27.1008	22.6949	21.6193
832	677	499	556	452	473	429	95	7	209	-0.105205	-0.252544	-0.150161	0.792079	-0.859675	0.318108	0.358074	0.106535	752.25	-0.53152	8.2229	7.54199	7.79149	8.78071	0.710108	0.682639	0.925244	63.0137	33.8819	63.57	4.5629	-0.472076	37.8044	3.23586	35.2961	8.78071	49.2865	37.9907	40.4903	7.93171	9.09468	41.7398	8.2229	7.67443	43.7782	64.2557	34.4171	33.1809	40.0467	53.9251
1807	1626	1449	1428	1318	1350	1283	1097	1011	1216	-0.0488599	-0.106122	-0.0697612	0.996195	-0.325338	0.0387352	0.108007	0.0370493	-2404.5	-0.411659	11.261	10.8661	11.0521	11.7591	0.47623	0.338352	0.99873	40.1055	24.3263	63.15	10.3134	-0.365582	25.1132	2.89751	24.9479	11.7591	27.1553	26.1064	25.3037	11.3159	-13.397	28.2185	11.261	10.9641	49.6302	25.4008	20.3655	22.0943	18.7041	20.0039
1026	957	684	724	541	586	470	116	7	151	-0.209549	-0.363248	-0.299123	0.565996	-0.878788	0.494983	0.581818	0.0369588	2289	-0.66878	8.97938	7.77498	8.36821	9.85456	0.834826	0.791037	0.827188	76.9585	41.9598	62.88	4.877	-0.593966	24.4595	3.47492	47.1704	9.85456	65.494	44.8423	46.0573	8.81087	13.179	59.4724	8.97938	8.14828	58.5628	48.1723	40.8826	38.128	45.7648	52.1796
2248	2167	1963	2158	2605	2856	2956	1231	1011	1839	0.0368008	-0.0126168	0.052546	1.06673	-0.431934	0.069332	-0.0196788	0.0524919	-5933.5	0.374553	12.9226	14.3516	14.1879	12.9406	-0.269981	0.410813	1.02177	33.9529	22.5466	62.74	10.7173	0.332623	14.3894	2.82506	25.3834	12.9406	28.5449	26.8109	22.3674	12.521	-18.1038	30.3303	12.9226	13.7595	27.4703	45.3495	20.2079	21.4362	19.5044	30.8929
2513	2598	2707	3003	3884	4396	4647	792	43	2523	0.156041	0.176023	0.222811	0.921251	-0.69515	0.190178	-0.136016	0.0693597	-11137.2	0.606241	14.4273	16.6875	16.3815	13.7472	-0.514276	0.575069	0.97303	72.4054	39.1341	62.66	9.25213	0.538368	22.4324	3.39509	23.4032	13.7472	31.1304	24.3202	22.4774	13.9368	-22.3319	32.4824	14.4273	15.7191	23.0666	40.0134	27.4579	30.321	25.9881	33.2614
702	457	278	272	334	346	322	72	8	95	0.0124334	-0.231806	0.0177414	0.512281	-0.842451	0.5	0.515755	0.279326	911.5	0.260813	6.47922	6.85412	7.02035	7.70262	0.801951	0.793701	0.800146	39.766	24.2194	61.37	4.16017	0.231666	105.512	2.89326	24.8512	7.70262	9.39385	24.0217	16.6535	6.52652	9.69584	30.2234	6.47922	6.93823	4.31776	33.4322	27.8671	27.2688	31.6617	34.3265
1024	758	536	516	460	519	463	142	8	202	-0.102881	-0.269682	-0.146849	0.768349	-0.812665	0.366771	0.387008	0.153239	1027.5	-0.527582	8.02078	7.73619	8.03629	9.11779	0.728741	0.715811	0.91591	30.0832	21.5979	61.2	5.2171	-0.468574	30.0323	2.78486	22.0898	9.11779	15.1238	20.3958	20.5908	8.1231	10.0908	45.8393	8.02078	7.71944	34.4346	24.6912	23.7724	22.8383	26.1205	25.3076
1279	1239	1038	1142	990	1017	966	202	14	615	-0.108974	-0.195369	-0.15558	0.908873	-0.836965	0.151139	0.240861	0.00883266	24.25	-0.537838	10.4525	9.88536	10.0563	10.7405	0.622189	0.53267	0.968652	75.3682	40.9521	60.94	5.86746	-0.477648	23.196	3.44687	39.4377	10.7405	58.8423	40.1495	40.4794	10.1251	2.89448	43.1378	10.4525	9.96655	52.9513	54.6492	34.1282	35.2641	39.2417	49.7894
1014	807	629	570	529	557	521	217	12	266	-0.176801	-0.294306	-0.25237	0.863636	-0.731103	0.246459	0.35973	0.0722714	866.5	-0.631945	8.29134	8.0466	8.22783	9.31018	0.711201	0.626972	0.952307	4.85572	18.643	60	6.00925	-0.561256	17.2724	2.65158	19.292	9.31018	31.79	18.9449	14.4699	8.56808	9.53358	47.8955	8.29134	8.08758	33.201	8.09082	21.2546	21.0511	22.6266	12.3946
907	725	545	578	546	567	531	114	7	230	-0.0654936	-0.20532	-0.0934858	0.648536	-0.842759	0.350282	0.400966	0.119192	908	-0.453853	8.32995	8.09776	8.27677	8.98351	0.737399	0.704919	0.865588	45.354	26.1078	59.56	4.84881	-0.403088	39.3707	2.96658	26.8658	8.98351	39.6294	29.114	31.6001	8.16831	9.68342	45.162	8.32995	8.1733	32.071	50.2736	26.0074	26.1462	28.9344	40.1648
3071	3014	3137	3231	3652	4083	4539	1872	82	3709	0.0777598	0.0976048	0.111034	1.12793	-0.378898	-0.00583051	-0.156805	0.0355853	-15600.2	0.480639	14.7836	16.5572	15.9831	14.4449	-0.539246	-0.179985	1.04094	31.0476	21.8221	59.39	12.3245	0.426827	11.9858	2.79446	26.415	14.4449	21.0085	27.7625	22.5114	14.6388	-24.9868	33.3767	14.7836	15.3996	31.4226	28.8266	22.6774	22.4696	24.5693	26.4127
1441	1367	1164	1200	1001	1040	980	204	9	617	-0.088359	-0.167378	-0.126151	0.797949	-0.850768	0.224874	0.274592	0.0185497	415.5	-0.501531	10.6266	9.93288	10.1316	11.0983	0.649974	0.608107	0.927524	60.3652	32.541	59.37	5.88677	-0.4454	24.9549	3.1926	33.2507	11.0983	47.6372	36.0021	36.2183	10.5192	7.46203	55.0477	10.6266	10.0033	58.3929	37.2573	26.9278	27.7695	29.548	34.631
2417	2722	3037	3201	3486	3806	4136	2027	590	3339	0.0128393	0.0674889	0.0183332	1.32542	-0.255327	-0.0345469	-0.205487	-0.0466098	-15593.2	0.263681	14.7377	16.0519	15.6131	13.9625	-0.590104	-0.325689	1.09846	52.0317	28.7247	59.05	12.6557	0.23416	23.2899	3.06257	23.1818	13.9625	40.06	24.6952	23.1776	14.4815	-24.9831	33.4194	14.7377	15.1627	35.1158	31.5438	22.9459	24.2439	23.2578	26.8725
1140	1041	851	843	721	729	694	117	10	437	-0.0896287	-0.188356	-0.127955	0.862166	-0.887608	0.238676	0.258767	0.0419364	332.5	-0.503909	9.44661	8.8536	9	10.1348	0.63724	0.620302	0.951766	42.159	24.9945	59.01	4.89097	-0.447523	35.43	2.9238	25.588	10.1348	54.213	27.5411	29.3456	9.4764	6.92783	47.8972	9.44661	8.96696	48.2844	29.2954	23.4323	23.6661	25.3248	27.2491
5411	5382	5840	5754	5884	6156	6345	2226	41	4722	0.0259361	0.0666782	0.0370355	1.00325	-0.586399	0.131426	-0.0682939	-0.00507702	-17679.2	0.333329	17.9194	18.513	18.3273	17.5246	-0.408753	0.508426	1.00108	41.2997	24.7104	58.87	13.0569	0.296007	22.961	2.91268	24.728	17.5246	23.9561	25.5228	23.9897	18.0082	-26.0508	25.1923	17.9194	18.0533	34.4055	28.811	29.2163	28.2824	33.3762	33.2244
3538	3541	4050	4525	5066	5370	5768	2692	117	4643	0.0809032	0.147158	0.115524	1.12261	-0.239763	0.0127578	-0.203195	0.0122554	-21183	0.487032	16.5402	17.9339	17.5116	15.242	-0.587901	0.233664	1.03931	66.0461	35.4929	58.58	13.911	0.432502	21.3412	3.28635	20.7941	15.242	19.215	19.0708	16.2452	15.9399	-27.6692	33.2393	16.5402	17.1747	28.1871	28.3797	27.9075	28.2183	31.4271	31.4731
6020	5943	6323	6343	6472	6669	6914	3032	1025	5630	0.0208285	0.051775	0.0297421	1.06644	-0.48982	0.0787105	-0.0837894	-0.00134611	-21478.5	0.30983	18.5111	19.0506	18.8229	18.1135	-0.437586	0.428559	1.02167	40.446	24.4346	58.48	14.4736	0.275139	40.1803	2.9018	24.869	18.1135	30.2344	26.2207	28.8099	18.4916	-27.7972	23.7751	18.5111	18.6357	32.1098	26.9114	31.2612	29.8056	35.7036	34.0144
1160	1151	914	1007	688	711	601	94	8	263	-0.211398	-0.318442	-0.301791	0.621849	-0.918332	0.386946	0.513478	-0.020374	2252	-0.670763	10.0233	8.43901	8.92531	10.4799	0.800769	0.728703	0.853549	93.5668	53.8134	58.05	4.54684	-0.595709	27.937	3.7754	62.2549	10.4799	70.0061	54.9298	57.9182	9.7047	13.1076	65.1946	10.0233	8.82801	78.8589	56.3638	50.7357	48.0617	58.2674	65.197
2104	2031	1882	2045	2051	2157	2212	1463	1175	1720	0.00475939	-0.0333249	0.00679563	1.02579	-0.279665	0.0497238	0.020603	0.030896	-4877	0.189413	12.693	13.0295	12.9206	12.664	0.274143	0.367723	1.00852	52.2453	28.8149	57.67	11.3522	0.168209	19.0211	3.06577	24.6989	12.664	31.3709	26.0683	23.2615	12.3464	-16.9584	30.1338	12.693	12.7054	43.9816	43.772	21.6659	24.1769	18.5551	29.4481
867	783	685	836	592	623	491	125	30	186	-0.134106	-0.199081	-0.191435	0.581262	-0.840358	0.475317	0.440662	0.00724638	1273.75	-0.576334	9.42039	7.88909	8.54075	9.21695	0.760972	0.780419	0.834559	131.173	89.6242	57.67	5	-0.511858	29.3072	4.47516	102.969	9.21695	69.9123	89.4629	97.6071	8.81516	10.84	53.0922	9.42039	8.39667	68.6308	87.1867	93.2895	91.2808	112.812	117.222
848	710	451	503	343	354	267	57	7	68	-0.24758	-0.446029	-0.353334	0.334559	-0.919718	0.6	0.772784	0.107814	2221	-0.706961	7.95285	6.43928	7.07404	8.92112	0.917669	0.843433	0.69421	73.5072	39.8012	57.57	3.8485	-0.627921	34.0255	3.41428	44.3331	8.92112	54.4683	46.1847	48.7914	7.66877	13.0472	50.0129	7.95285	7	57.2101	65.1016	43.154	38.4662	41.9519	55.654
1338	1209	1147	1150	1102	1164	1133	191	8	762	-0.0669767	-0.0931284	-0.0956238	0.987039	-0.842018	0.136544	0.0995907	0.0101402	-1470.25	-0.457287	10.4769	10.425	10.5192	10.6531	0.463525	0.514941	0.995661	53.1993	29.2226	56.96	5.75897	-0.406108	28.5139	3.08016	25.8803	10.6531	42.5726	27.9632	28.2637	10.4678	-11.371	25.7184	10.4769	10.3291	42.4798	30.571	23.9301	25.902	23.2646	26.3571
6669	6488	6662	6494	6877	7246	7450	1302	15	3169	0.0389498	0.0521549	0.0556186	0.718828	-0.799322	0.388873	0.112387	0.020114	-5271.25	0.381716	18.6568	19.5307	19.3508	18.6511	0.482584	0.72991	0.895794	74.9302	40.6785	56.77	10.9195	0.338976	13.9184	3.43918	26.6376	18.6511	40.5214	28.8431	24.5663	18.8163	-17.4036	19.5955	18.6568	19.0166	25.8572	32.6106	33.4283	34.8486	37.8653	38.73
1106	1126	1042	906	534	554	398	76	17	135	-0.396783	-0.428934	-0.566443	0.391111	-0.932504	0.538462	0.729647	-0.145055	3316.25	-0.827406	9.6763	7.35576	8.21303	10.4035	0.900266	0.813551	0.731308	62.2338	33.4806	56.14	4.23582	-0.734826	19.6765	3.22303	37.0091	10.4035	78.4896	32.8615	31.2368	10.1381	14.9125	72.9491	9.6763	8.11298	94.5733	-3.46634	32.5932	29.506	34.5723	13.9881
3485	3281	3600	3654	3865	4274	4611	860	21	4150	0.0406396	0.0868355	0.05803	1.34699	-0.737885	-0.0304159	-0.231706	0.0130226	-20304.8	0.387154	15.4024	16.6443	16.2285	14.8594	-0.614204	-0.312153	1.10439	71.4968	38.5921	55.99	9.50969	0.343808	19.7389	3.37935	20.6279	14.8594	18.4194	18.6807	15.1841	15.3262	-27.2814	34.0201	15.4024	15.6934	37.3423	26.7502	27.1789	29.8533	26.1374	26.477
905	751	576	612	494	535	468	204	13	283	-0.141724	-0.268581	-0.202297	0.923788	-0.728362	0.209497	0.304952	0.0746988	517.5	-0.587034	8.49018	7.76394	8.11804	9.08964	0.673096	0.593917	0.973922	62.6185	33.6779	55.94	5.88677	-0.521373	20.4395	3.22935	34.6641	9.08964	48.1692	37.4778	36.7497	8.32034	8.02854	42.282	8.49018	7.90513	46.6812	50.4008	33.4472	32.2617	38.8152	47.7426
918	819	548	601	385	396	312	72	10	127	-0.251142	-0.428073	-0.358455	0.527439	-0.912088	0.441758	0.65121	0.0640478	2152.75	-0.71036	8.43901	6.78242	7.34342	9.3561	0.866776	0.761602	0.807962	77.8694	42.547	55.75	4.16017	-0.630918	29.6281	3.49105	47.741	9.3561	63.3087	46.2164	48.3802	8.18327	12.9121	53.935	8.43901	7.27479	69.1801	59.3305	44.9956	39.9747	42.615	54.1423
1708	1494	1309	1288	1342	1264	1368	1093	1008	1084	0.000381825	-0.0656205	0.000545157	0.89771	-0.268407	0.0944027	0.119101	0.0709723	-2036.5	0.0816909	10.8802	11.101	10.8122	11.4319	0.492008	0.455332	0.96467	4.22115	18.6409	55.62	10.3009	0.0725473	19.0877	2.65148	25.4997	11.4319	24.6269	26.6947	23.9985	10.9391	-12.6754	27.067	10.8802	11.0302	36.0411	25.4399	18.4529	20.0328	16.2957	18.1884
1348	1265	1240	1276	1164	1244	1211	237	16	741	-0.067585	-0.0775128	-0.0964936	0.894737	-0.812648	0.1875	0.132498	-0.0099776	-1124.5	-0.458669	10.8463	10.659	10.7549	10.8151	0.509804	0.572357	0.963604	60.0497	32.3854	55.27	6.18846	-0.407334	24.5965	3.1875	27.1741	10.8151	49.4867	29.3064	28.6831	10.7434	-10.3989	27.8173	10.8463	10.5192	49.2236	36.3248	25.8577	28.0231	25.577	31.1243
805	646	406	444	323	346	284	44	6	89	-0.201183	-0.41048	-0.287108	0.522222	-0.931889	0.504178	0.641677	0.139375	1707.75	-0.659703	7.62888	6.57314	7.02035	8.64459	0.862526	0.795905	0.805289	58.5928	31.6782	55.21	3.53035	-0.585955	42.7793	3.16413	33.7147	8.64459	48.343	36.4185	39.2788	7.40472	11.9529	44.6252	7.62888	6.86121	47.7924	60.3205	35.1227	31.5011	36.2181	49.6417
809	683	455	497	320	335	256	73	14	124	-0.24487	-0.4244	-0.34947	0.630435	-0.893119	0.38	0.593932	0.0877193	1626	-0.704374	7.9211	6.3496	6.94515	8.80657	0.84058	0.724316	0.857459	79.5885	43.6751	54.55	4.17934	-0.625622	29.8518	3.52164	48.3544	8.80657	59.5414	48.2898	50.6924	7.69137	11.7591	46.6352	7.9211	6.8399	62.3214	59.3779	48.175	42.6811	43.9503	55.1814
1765	1521	1350	1354	1300	1319	1259	1057	1010	1105	-0.0277884	-0.0872051	-0.0396753	0.929522	-0.305062	0.0722082	0.123338	0.0595611	-2022	-0.341067	11.063	10.798	10.9668	11.5003	0.497774	0.416417	0.975933	41.2954	24.709	54.24	10.1865	-0.302892	23.4118	2.91263	24.969	11.5003	20.7616	25.5731	24.1901	11.0521	-12.6452	27.5792	11.063	10.9139	44.5877	29.7186	20.5872	22.3879	18.8573	22.5307
2711	2584	2516	2610	3030	3463	3572	582	12	1775	0.0875793	0.0743328	0.125054	0.830944	-0.774768	0.256389	0.0181245	0.0631167	-5263	0.500071	13.7683	15.2864	15.1293	13.7224	0.262677	0.635282	0.940136	90.5547	51.4834	54.11	8.34913	0.444086	32.5354	3.72011	30.6783	13.7224	21.6575	34.1749	35.7756	13.601	-17.3945	32.2704	13.7683	14.4704	30.1691	31.7962	35.0969	39.7436	30.8099	32.817
1982	2084	2044	2206	2005	2108	2122	464	14	1474	-0.0593418	-0.068992	-0.0847307	1.03802	-0.777351	0.103679	0.0504032	-0.0369055	-3707.25	-0.439218	13.0177	12.8504	12.822	12.7732	0.369391	0.469783	1.01251	69.9099	37.6629	54.03	7.74175	-0.39005	17.427	3.352	26.8234	12.7732	45.5006	29.028	26.0862	12.6909	-15.4769	31.4285	13.0177	12.6097	56.9108	41.1595	26.8499	29.8465	24.6794	32.8197
6973	7614	8384	8157	8483	8769	8770	2397	25	5828	-0.011461	0.0366903	-0.0163658	0.927874	-0.685185	0.168735	0.000722876	-0.0501331	-18031.5	-0.25389	20.13	20.6221	20.6213	19.673	0.0897473	0.552588	0.975356	68.3577	36.7753	53.8	13.3831	-0.225462	59.4302	3.32546	21.312	19.673	8.7806	17.9806	22.7694	20.315	-26.2227	10.8006	20.13	20.3947	19.8747	38.7515	36.8498	35.7649	43.3762	46.0831
1168	1204	1566	1611	1812	1933	2048	508	14	1617	-0.317073	-0.194444	-0.452699	2.48276	-0.578073	-0.331412	-0.252174	-0.225352	-7897.75	-0.767838	11.7228	12.6992	12.4569	10.6384	-0.631781	-0.692027	1.35408	30.3424	21.6574	53.6	7.97911	-0.681899	9.79488	2.78742	25.8938	10.6384	77.09	26.1886	19.6884	11.6126	-19.9144	27.4872	11.7228	12.1914	31.5127	34.4365	19.1019	21.3561	15.55	22.5523
1114	988	838	926	795	839	774	168	10	488	-0.0954248	-0.17619	-0.136229	0.99422	-0.82996	0.172881	0.178998	0.0373349	-315	-0.514544	9.74699	9.1815	9.43164	9.95984	0.563572	0.557078	0.998069	83.3539	46.2369	53.4	5.51785	-0.456969	27.6696	3.58919	36.8826	9.95984	49.5418	39.6529	40.8402	9.42789	-6.80409	24.0169	9.74699	9.2638	49.844	57.9969	41.2704	41.9807	49.5392	58.9827
912	827	615	712	566	609	576	96	10	330	-0.103139	-0.24642	-0.147226	0.984	-0.883918	0.204819	0.25398	0.0688872	307.5	-0.528034	8.92949	8.32034	8.47629	9.38646	0.633286	0.589464	0.994638	73.8517	40.0119	53.35	4.57886	-0.468966	37.8404	3.42029	40.8463	9.38646	67.3367	38.9573	41.4946	8.50403	6.74966	40.7034	8.92949	8.2719	51.7852	73.3989	38.4441	37.4374	45.5403	60.9431
767	517	318	306	296	296	247	48	6	40	-0.15009	-0.375	-0.214163	0.331915	-0.907157	0.709091	0.737815	0.223443	1587.25	-0.598295	6.73866	6.27431	6.66444	8.02596	0.903613	0.891731	0.692376	13.7227	19.0433	53.29	3.63424	-0.531436	46.422	2.67043	19.1183	8.02596	11.4531	14.9098	18.8192	6.82562	11.6649	38.3851	6.73866	6.66444	18.7597	28.2476	24.6374	22.955	26.818	27.8289
880	746	477	527	326	329	248	67	10	90	-0.294437	-0.483101	-0.420212	0.511538	-0.910188	0.485714	0.697383	0.0888252	2139.5	-0.749013	8.07737	6.28276	6.90344	9.06942	0.886796	0.786068	0.79976	77.4493	42.2753	53.27	4.06155	-0.665269	27.8108	3.4836	47.3779	9.06942	54.7852	49.1617	51.4286	7.81339	12.8856	50.8013	8.07737	6.88239	68.2655	62.2057	46.4054	40.4992	39.7222	52.9698
874	782	545	589	432	427	372	98	9	199	-0.173305	-0.341338	-0.247365	0.716146	-0.87468	0.317324	0.479659	0.0715503	1384.75	-0.627739	8.38247	7.19197	7.53025	9.21303	0.782788	0.682079	0.894679	61.3885	33.0518	53.12	4.61044	-0.557532	30.2816	3.20921	35.0989	9.21303	67.2876	34.3661	35.5664	8.16831	11.1461	48.9712	8.38247	7.55953	54.7922	55.3735	33.9982	31.4272	37.5196	48.7593
1085	861	756	798	725	782	750	133	16	528	-0.110948	-0.174625	-0.158384	1.38182	-0.845528	0.0679612	0.0147319	0.0555903	-1503.25	-0.541049	9.27544	9.0856	9.21303	9.51337	0.245143	0.408088	1.11383	57.2302	31.0337	53.05	5.10447	-0.480514	30.432	3.14252	26.383	9.51337	27.2302	28.122	28.9009	9.10977	-11.4554	17.5946	9.27544	8.98351	41.3845	46.6873	27.9886	29.0847	30.6937	39.9385
2094	2086	2156	2196	2135	2311	2368	665	330	1638	-0.012682	0.00382044	-0.0181081	1.05709	-0.681208	0.124064	-0.0315692	-0.0136342	-5574	-0.262598	12.998	13.3289	13.2211	12.7773	-0.316049	0.498749	1.01868	37.6601	23.5791	53.04	8.72852	-0.2332	19.2976	2.86754	25.0963	12.7773	35.6667	26.8247	24.2203	12.9186	-17.7306	31.2372	12.998	12.8765	48.0854	30.1116	19.7715	21.7339	17.292	21.5561
1578	1535	1485	1491	1406	1470	1457	245	15	1030	-0.0344828	-0.0510099	-0.049234	0.979798	-0.840391	0.147351	0.0611822	-0.00101112	-2471	-0.366512	11.4242	11.3367	11.3703	11.5355	0.394041	0.528183	0.99322	53.5675	29.3821	52.64	6.25732	-0.325487	28.413	3.08575	25.4609	11.5355	46.9182	27.5092	27.7479	11.4089	-13.5194	28.5115	11.4242	11.2028	47.8093	29.4366	22.8934	25.1079	21.1636	24.1353
991	902	757	864	697	732	689	120	10	351	-0.110785	-0.196286	-0.158151	1.06931	-0.866962	0.266458	0.163871	0.0266795	-100.75	-0.540785	9.52441	8.83228	9.01233	9.66204	0.547227	0.643491	1.02259	79.9569	43.9203	52.51	4.93242	-0.480279	32.4452	3.52821	36.853	9.66204	62.56	36.9002	38.6649	9.11378	-4.65316	24.5643	9.52441	8.86634	54.8963	67.6888	40.3059	40.5015	48.4237	61.4208
1287	1266	1294	1319	1357	1566	1550	457	53	1533	0.076374	0.0872386	0.109045	1.35411	-0.639021	-0.00822098	-0.234583	0.0384544	-7696.75	0.477752	10.9668	11.5729	11.6126	10.8179	-0.616735	-0.201825	1.10633	102.608	61.2862	52.38	7.70262	0.424276	41.4685	3.94264	32.6047	10.8179	61.3987	33.3996	36.157	10.8971	-19.744	24.6085	10.9668	11.0712	37.4569	33.7584	50.2526	54.603	54.8505	52.7658
738	528	337	352	280	287	228	60	8	68	-0.178322	-0.38401	-0.254453	0.476596	-0.886364	0.551155	0.65	0.181542	1418.25	-0.633679	7.0607	6.10911	6.5962	8.08248	0.866239	0.819894	0.781118	46.6121	26.5708	52.06	3.91487	-0.562861	39.0996	2.98402	27.5205	8.08248	27.8323	29.7395	32.195	6.95894	11.2353	38.5228	7.0607	6.54213	34.7992	49.07	31.2597	28.3511	33.3285	42.984
1903	1745	1578	1609	1654	1757	1881	602	47	1515	0.148638	0.0991224	0.21223	0.992015	-0.655014	0.168496	-0.0951517	0.12187	-6166.5	0.596489	11.718	12.3442	12.0668	12.0392	-0.456533	0.552328	0.997331	38.4937	23.8279	51.87	8.44369	0.529716	32.7555	2.87759	25.0562	12.0392	28.0878	26.3269	27.5315	11.6422	-18.3378	27.7043	11.718	11.8262	39.5465	32.4476	19.7451	21.8002	17.0179	22.6086
6501	6336	6528	6460	6605	6818	7092	2799	38	3633	0.0380195	0.0529148	0.0542901	0.73197	-0.558239	0.319472	0.10268	0.0183828	-7031.75	0.378652	18.6242	19.2128	18.9621	18.5043	0.468269	0.683614	0.901221	60.672	32.6932	51.09	14.0929	0.336255	30.4297	3.19756	24.2921	18.5043	38.0921	25.9347	26.5701	18.6893	-19.1582	20.073	18.6242	18.7625	31.2377	29.5091	31.1464	31.7982	35.6167	35.3483
2113	2380	2505	2549	3333	3891	4090	765	12	2505	0.139766	0.164766	0.199572	0.975595	-0.678571	0.139766	-0.152723	0.0404137	-11150.5	0.584386	13.6602	15.9922	15.7285	13.3514	-0.534526	0.518961	0.991798	44.5757	25.8283	51.06	9.14577	0.518961	23.551	2.95596	24.41	13.3514	49.2971	26.3896	25.1396	13.5811	-22.3408	32.213	13.6602	14.9375	23.1992	28.9944	22.0526	22.7689	22.8998	25.2226
810	656	499	544	378	409	309	58	7	57	-0.205314	-0.33198	-0.293037	0.303951	-0.911585	0.704663	0.73545	0.0659803	1985	-0.664213	8.16331	6.76061	7.42291	8.68896	0.902646	0.889871	0.672359	79.3002	43.4841	51.04	3.87088	-0.589938	37.2388	3.5165	48.6891	8.68896	50.0147	52.3068	55.4686	7.93171	12.5676	50.9082	8.16331	7.23043	57.762	58.2998	46.2189	42.8451	50.5938	59.9103
732	491	339	370	426	492	491	148	12	179	0.0712329	-0.113379	0.101661	0.882353	-0.698574	0.37193	0.174641	0.247085	-6	0.466715	7.17905	7.88909	7.89445	7.88909	0.558962	0.719151	0.959137	58.3166	31.5462	50.76	5.28957	0.414534	90.4497	3.15972	29.4313	7.88909	13.4572	31.9732	27.9885	6.97268	-1.81712	11.0493	7.17905	7.52437	11.9304	60.6725	32.6617	33.3056	37.7196	50.9053
3892	3587	3105	3066	3868	4121	4296	1447	1011	2828	0.224138	0.154608	0.320052	0.786079	-0.596599	0.268021	-0.0354934	0.172055	-10057.8	0.684027	14.5275	16.2563	16.0325	15.3077	-0.328637	0.644748	0.922902	27.395	21.0165	50.55	11.3107	0.607442	5.61475	2.75965	26.4471	15.3077	19.5791	27.6994	19.5899	14.5888	-21.5857	32.4234	14.5275	15.6974	24.0574	24.7486	23.4243	23.6421	25.3268	24.7258
886	669	495	483	415	443	414	97	25	239	-0.151163	-0.294004	-0.215753	0.956164	-0.855007	0.208609	0.314342	0.116466	531.5	-0.599771	7.84601	7.45304	7.62315	8.74598	0.679935	0.593077	0.985169	27.6871	21.0766	50.49	4.5947	-0.532699	32.4769	2.76227	21.8604	8.74598	28.2326	21.925	22.8597	7.91046	8.1003	39.1273	7.84601	7.45904	35.9842	28.7459	24.0297	23.0512	26.4521	27.8186
2606	2482	2395	2577	3521	4133	4449	544	92	2443	0.190878	0.173631	0.272555	0.891915	-0.780822	0.1813	-0.117668	0.122791	-10247.5	0.648362	13.71	16.447	16.048	13.5394	-0.490026	0.565978	0.96259	51.2658	28.4047	50.35	8.16331	0.575774	37.9687	3.05115	23.8528	13.5394	22.5363	24.1016	26.3059	13.3794	-21.7206	31.8756	13.71	15.2133	21.8453	38.0577	22.9313	23.9626	23.6827	30.5495
865	706	472	536	391	394	302	81	11	128	-0.196451	-0.380254	-0.28038	0.561514	-0.885269	0.424719	0.597285	0.111947	1680.75	-0.654509	8.1231	6.70917	7.33104	8.90434	0.842159	0.751682	0.824999	90.5739	51.498	50.35	4.32675	-0.581324	31.8143	3.72046	58.1612	8.90434	47.3969	64.071	68.3019	7.78599	11.8896	47.8054	8.1231	7.31238	52.7045	69.7971	54.8799	50.5251	57.2337	68.8378
2772	2710	2529	2798	3617	4053	4233	708	11	2659	0.192529	0.159038	0.274912	0.974297	-0.738745	0.168283	-0.146322	0.125292	-11962	0.650227	14.0912	16.1764	15.9438	13.9419	-0.526951	0.552094	0.991358	77.6416	42.3995	49.95	8.91274	0.577429	26.8745	3.48701	23.4968	13.9419	23.1381	23.6476	23.1461	13.6244	-22.8701	32.375	14.0912	15.3503	23.4081	41.2655	28.9746	32.5357	25.913	33.8065
853	675	436	480	341	358	293	68	10	106	-0.197802	-0.39607	-0.282296	0.613014	-0.899259	0.467337	0.580796	0.13535	1619.5	-0.655996	7.82974	6.64185	7.10059	8.77205	0.834337	0.776027	0.849487	64.7965	34.8192	49.53	4.08166	-0.582654	34.9371	3.26543	37.4597	8.77205	41.3116	41.7656	44.1611	7.58279	11.7434	45.6434	7.82974	6.98637	52.0516	61.7489	37.8774	34.0739	39.0038	52.2638
1254	1122	1043	1017	962	1024	1000	184	9	650	-0.123922	-0.15969	-0.17692	1.02829	-0.836007	0.111415	0.146067	-0.00457501	-846.75	-0.561383	10.0563	10	10.0794	10.3912	0.526645	0.481188	1.00934	39.5321	24.1464	49.13	5.68773	-0.498559	23.4258	2.89035	24.9171	10.3912	44.3007	26.8803	25.6455	10.1413	-9.46059	25.5627	10.0563	9.87169	41.8372	24.2424	21.4167	22.8752	20.7824	20.9338
7053	6975	7558	7596	7790	8145	8309	3461	38	4218	0.00204661	0.0421587	0.00292248	0.79378	-0.503799	0.285509	0.0731595	-0.0159285	-9692.75	0.142972	19.6575	20.2543	20.1201	19.1065	0.418238	0.658476	0.925906	74.8455	40.6258	49	15.1263	0.126963	64.1006	3.43769	24.2082	19.1065	40.6528	25.9492	29.4096	19.6247	-21.3214	14.2587	19.6575	19.8234	25.1211	27.4714	35.6259	35.7368	42.0838	39.3476
3990	3954	4004	4207	4733	5177	5448	1284	14	2928	0.0579932	0.0642528	0.0828101	0.89682	-0.675266	0.211313	-0.00989107	0.0290391	-9492.25	0.435874	16.1432	17.5959	17.2992	15.8129	-0.214658	0.595629	0.964351	58.6916	31.7256	48.91	10.869	0.387072	12.886	3.1657	23.6275	15.8129	18.6636	23.3034	17.6289	15.8793	-21.1734	30.8764	16.1432	16.7898	28.9164	27.1829	26.2079	26.909	28.7117	28.7094
1900	1644	1449	1437	1408	1420	1389	1165	1013	1203	-0.0320513	-0.0949051	-0.0457623	0.970567	-0.291363	0.0608899	0.109686	0.0586325	-2348	-0.357686	11.2846	11.1575	11.2399	11.8023	0.478686	0.393413	0.990091	27.7081	21.0809	48.79	10.5223	-0.31765	26.0307	2.76246	25.1408	11.8023	18.8954	25.6445	25.0688	11.3159	-13.2913	28.2785	11.2846	11.2082	43.2236	26.8042	18.9883	20.7442	16.6637	19.2435
1162	899	677	721	919	1028	1069	177	8	459	0.23546	0.0978424	0.336156	0.633455	-0.803115	0.408886	0.129397	0.249861	-711.75	0.695313	8.96696	10.2249	10.0925	9.65132	0.505795	0.742222	0.858826	93.8447	54.0323	48.75	5.61467	0.617503	95.4155	3.78052	40.3502	9.65132	18.0013	49.2413	37.4206	8.78071	-8.92844	17.3952	8.96696	9.72236	15.7673	49.892	47.5526	50.7336	54.4677	59.7061
800	644	449	485	333	343	277	72	9	122	-0.208614	-0.373134	-0.297729	0.629252	-0.888199	0.413462	0.553679	0.0983936	1427	-0.667739	7.85683	6.51868	7	8.63566	0.821144	0.744981	0.856922	67.2365	36.1474	48.43	4.16017	-0.593081	32.9566	3.30643	38.8547	8.63566	49.4776	41.7911	43.9711	7.65741	11.2583	44.989	7.85683	6.9313	55.4746	56.4288	39.4942	35.6883	40.9624	51.795
860	725	520	594	436	438	356	95	9	172	-0.171171	-0.326624	-0.244315	0.741848	-0.868966	0.362963	0.452906	0.0828924	1243	-0.625148	8.40612	7.08734	7.59436	8.98351	0.767955	0.713325	0.905256	90.3496	51.3277	48.41	4.5629	-0.555235	31.0423	3.71635	56.8876	8.98351	55.0703	58.7441	62.3592	8.04145	10.752	46.8953	8.40612	7.58279	54.9514	70.8513	53.4137	50.0776	59.4977	70.8982
2007	1798	1612	1609	1508	1525	1490	1097	1008	1239	-0.0505051	-0.104762	-0.0721112	0.927248	-0.389878	0.0808605	0.14195	0.0358852	-1983.5	-0.416231	11.718	11.4216	11.5104	12.1599	0.521649	0.432426	0.975136	33.6506	22.4678	48	10.3134	-0.369639	25.169	2.82176	24.9326	12.1599	22.5649	25.6927	24.8661	11.7252	-12.5645	30.2227	11.718	11.4675	49.4832	27.7413	19.3549	21.2405	16.8812	19.9351
2034	1937	1672	1747	1607	1632	1545	1090	1007	1233	-0.042394	-0.115462	-0.0605306	0.89388	-0.437274	0.109426	0.170393	0.0326873	-1518.75	-0.392637	12.0438	11.5605	11.7735	12.4655	0.554392	0.478307	0.963296	60.4392	32.5777	47.62	10.2914	-0.348686	24.7143	3.19379	26.8772	12.4655	30.9495	28.9653	28.3389	11.8689	-11.4946	31.4269	12.0438	11.7131	52.7475	37.2039	24.3617	26.5387	23.3857	29.8975
854	561	351	363	366	364	311	94	5	127	0.0181818	-0.212973	0.0259481	0.535714	-0.832442	0.482688	0.484127	0.26875	1023.75	0.296052	7.13349	6.77517	7.14004	8.24747	0.785211	0.784433	0.812165	74.4175	40.3603	47.53	4.54684	0.262954	97.9878	3.43019	43.2415	8.24747	-1.38438	56.534	40.8513	7.054	10.0785	36.3954	7.13349	7.15309	19.2412	46.2306	43.1201	41.0053	50.0238	54.6826
756	591	423	517	418	439	387	144	11	134	-0.0736041	-0.236402	-0.10505	0.720548	-0.756345	0.462926	0.384075	0.139807	852.25	-0.471844	8.02596	7.28736	7.60014	8.39194	0.726896	0.773577	0.896508	77.9942	42.6281	47.44	5.24148	-0.419084	33.2347	3.49327	45.5128	8.39194	46.6195	49.9271	52.7713	7.50666	9.48103	39.0389	8.02596	7.47697	42.5472	90.7791	44.234	42.891	52.7443	70.4593
1282	1067	858	849	727	778	701	130	10	373	-0.118644	-0.224326	-0.169376	0.766272	-0.878163	0.288847	0.346372	0.0658683	1001.25	-0.553288	9.46897	8.88327	9.19729	10.2185	0.702287	0.661032	0.915084	52.2339	28.8101	47.25	5.0658	-0.491378	30.0771	3.0656	29.8808	10.2185	28.3449	33.0354	34.0913	9.50231	10.0042	55.5585	9.46897	8.99176	48.3128	28.9655	26.1772	26.1782	29.246	30.0975
789	631	368	422	330	364	280	61	7	54	-0.106767	-0.359914	-0.152365	0.329966	-0.903328	0.692308	0.731139	0.192097	1909.25	-0.534107	7.50074	6.54213	7.14004	8.57715	0.900879	0.88464	0.691019	74.1609	40.202	46.95	3.9365	-0.474401	46.8917	3.4257	44.4571	8.57715	48.9209	48.041	50.8535	7.1661	12.4057	43.6777	7.50074	6.91042	40.4528	73.6575	43.9767	39.8454	45.1978	60.7582
1725	1498	1323	1332	1329	1336	1297	1068	1007	1141	-0.0165194	-0.0784737	-0.0235858	0.935156	-0.287049	0.0574143	0.111688	0.0635286	-2253.75	-0.286781	11.0028	10.9055	11.0138	11.4421	0.481581	0.38578	0.977901	37.4815	23.5266	46.83	10.2217	-0.254682	23.0494	2.86541	24.9422	11.4421	22.9679	25.7443	24.2643	10.9779	-13.111	26.9746	11.0028	10.9945	40.4852	30.7209	19.9842	21.8255	17.8945	22.3445
1979	1754	1579	1604	1694	1759	1784	1142	1007	1301	0.0140493	-0.0384843	0.0200598	0.883621	-0.348917	0.110427	0.100031	0.0658187	-2707.75	0.271712	11.7058	12.1283	12.0713	12.0599	0.464207	0.479762	0.959596	39.0317	23.9917	45.54	10.4525	0.241297	16.5229	2.88417	24.9543	12.0599	21.3905	25.6128	21.8109	11.6447	-13.9381	29.1537	11.7058	11.9208	36.9307	31.6314	19.7864	21.8696	17.0049	22.1618
935	922	727	836	552	582	461	101	11	220	-0.237447	-0.345985	-0.338951	0.676339	-0.890456	0.341317	0.505306	-0.0250264	1759	-0.697234	9.42039	7.72503	8.34913	9.73293	0.796498	0.698853	0.877785	112.796	70.5699	45.39	4.65701	-0.619235	24.8068	4.13244	81.9798	9.73293	83.8209	57.6156	60.7023	8.99176	12.0713	57.661	9.42039	8.20313	76.9809	70.1162	72.3334	68.0161	77.8203	85.1163
980	758	598	601	511	559	493	68	10	229	-0.118803	-0.233523	-0.169582	0.721868	-0.91029	0.345714	0.380692	0.0963355	924.5	-0.553512	8.43901	7.89979	8.23766	9.11779	0.724755	0.701842	0.897056	54.3268	29.7148	45.37	4.08166	-0.491596	43.0658	3.09735	30.8364	9.11779	27.4793	34.3805	37.2653	8.42494	9.74172	47.3329	8.43901	7.99479	41.5863	35.2934	29.5097	28.7652	33.8353	36.9566
1464	1381	1261	1308	1166	1218	1200	332	79	856	-0.0842648	-0.129191	-0.120308	1.00563	-0.759594	0.108798	0.126427	0.00138586	-1380.25	-0.493664	10.9363	10.6266	10.6795	11.1361	0.501896	0.47739	1.00187	54.1434	29.634	45	6.92436	-0.438412	18.4339	3.09454	26.0456	11.1361	45.6953	28.1577	25.44	10.8037	-11.134	27.5186	10.9363	10.5253	52.2225	38.0997	23.9122	25.6438	23.7803	30.6445
776	558	368	348	269	266	215	49	9	54	-0.236975	-0.421656	-0.338157	0.400881	-0.912186	0.615658	0.719569	0.153537	1662.75	-0.69669	7.03385	5.99073	6.43123	8.23275	0.896102	0.850707	0.737347	19.6463	19.6963	44.96	3.65931	-0.618824	37.6021	2.70061	19.7735	8.23275	25.6156	18.6397	20.7255	7.1661	11.847	42.1408	7.03385	6.45531	36.6598	22.7128	25.6726	23.0075	26.7703	24.6794
1122	778	518	553	701	718	731	124	9	307	0.317972	0.125351	0.453937	0.531469	-0.840617	0.530581	0.187786	0.344096	-110.5	0.768538	8.20808	9.00822	8.9545	9.19729	0.572648	0.809563	0.810014	102.33	61.0459	44.86	4.98663	0.682543	118.215	3.93748	50.2117	9.19729	-4.26091	70.2852	34.0625	8.03113	-4.79867	16.2309	8.20808	8.88327	12.671	52.3828	58.3312	59.7309	72.6215	75.1659
785	647	401	536	410	434	340	68	6	92	-0.0823212	-0.311044	-0.117487	0.420588	-0.8949	0.574074	0.637975	0.167618	1678	-0.489775	8.1231	6.97953	7.57117	8.64904	0.860864	0.831105	0.749237	117.749	75.4123	44.79	4.08166	-0.435015	48.1169	4.22488	87.6375	8.64904	56.1441	90.191	93.682	7.3742	11.8831	44.1578	8.1231	7.42896	48.3306	116.433	82.3439	77.9362	88.8878	100.51
704	470	285	276	230	240	187	44	7	51	-0.212766	-0.435115	-0.303553	0.545946	-0.906383	0.567797	0.646235	0.218643	1289.5	-0.672066	6.51083	5.71848	6.21447	7.77498	0.864563	0.828065	0.817303	28.6045	21.2702	44.75	3.53035	-0.59699	41.6936	2.77071	21.639	7.77498	15.0431	19.6691	22.5755	6.58084	10.8845	33.8577	6.51083	6.12693	26.1179	30.6657	27.8976	24.8646	28.82	30.6807
3851	4233	5232	5425	5863	6242	6596	2044	46	5220	-0.0610424	0.044793	-0.0871647	1.35918	-0.517127	-0.0598985	-0.195706	-0.104671	-23752.5	-0.443384	17.5711	18.754	18.4123	16.1764	-0.580588	-0.391266	1.10771	67.3777	36.2259	44.72	12.6909	-0.393741	56.8553	3.30882	20.1757	16.1764	14.6448	17.2785	22.076	17.3602	-28.7455	29.7322	17.5711	18.0318	28.284	23.772	29.8669	29.3018	34.3505	31.2071
854	778	567	627	447	485	430	140	12	200	-0.170279	-0.318644	-0.243051	0.813433	-0.820051	0.335548	0.408145	0.051046	1153.5	-0.624068	8.55899	7.54784	7.85683	9.19729	0.741774	0.694894	0.933485	63.0197	33.885	44.64	5.19249	-0.554268	24.2275	3.23596	35.8376	9.19729	72.8963	33.5953	33.3524	8.27677	10.4875	48.0986	8.55899	7.64603	59.3895	61.3591	34.5175	32.2029	38.6855	51.8838
1127	1008	852	910	1048	1135	1160	284	12	714	0.0223752	-0.0616114	0.031944	1.21324	-0.718254	0.11028	-0.0349449	0.0843632	-2478.25	0.317295	9.69052	10.5072	10.4311	10.0266	-0.326935	0.479549	1.06655	27.737	21.0869	44.57	6.57314	0.281788	54.9277	2.76273	25.1768	10.0266	50.6011	27.1911	30.8565	9.48011	-13.5326	18.7022	9.69052	10.1575	24.3452	48.8463	19.6022	21.5406	17.1073	30.6902
777	698	436	702	1046	1200	1193	191	7	321	0.480952	0.281153	0.686625	0.516077	-0.726361	0.589776	0.041791	0.397166	-969.75	0.882213	8.88749	10.6059	10.6266	8.87058	0.347025	0.838615	0.802118	186.787	165.394	44.46	5.75897	0.783491	101.729	5.48917	127.729	8.87058	76.4117	101.059	68.8726	7.58279	-9.89813	6.89817	8.88749	10.151	9.60638	171.89	166.962	178.243	204.364	184.787
910	708	493	463	410	419	363	63	6	120	-0.165485	-0.33459	-0.236193	0.509915	-0.911017	0.4926	0.594595	0.123166	1693.75	-0.618143	7.73619	7.13349	7.48292	8.91274	0.840892	0.789766	0.798913	23.2734	20.2485	44.43	3.97906	-0.549017	39.4237	2.72561	20.3599	8.91274	33.3327	20.5527	23.0227	7.89979	11.9202	48.8531	7.73619	7.42896	32.7447	18.8154	23.5445	22.3269	25.7131	21.5635
1779	1579	1404	1416	1431	1470	1412	1072	1008	1117	-0.0122567	-0.0708715	-0.0174998	0.878102	-0.321089	0.101729	0.135155	0.0572436	-1910.25	-0.259624	11.2293	11.2188	11.3703	11.6447	0.513188	0.466819	0.957595	42.1542	24.9929	44.29	10.2345	-0.230564	22.8228	2.92374	24.9953	11.6447	25.4987	26.0413	24.5221	11.1975	-12.4079	28.3406	11.2293	11.2689	39.9421	30.7654	20.4651	22.469	18.1895	22.5925
1170	1092	886	919	788	800	761	125	7	480	-0.154397	-0.254451	-0.220418	0.964561	-0.885531	0.14969	0.271246	0.0130883	381.75	-0.604063	9.72236	9.12981	9.28318	10.2977	0.647323	0.530963	0.988045	54.7724	29.9124	43.41	5	-0.536472	27.4835	3.10421	30.4696	10.2977	57.0751	32.0422	32.4415	9.60457	7.25426	49.4566	9.72236	9.23653	49.8186	40.8879	26.4916	26.8819	29.4133	36.2934
3881	3980	4345	4276	4633	4966	5266	1262	18	4261	0.0274203	0.0711785	0.0391543	1.1159	-0.682915	0.0371709	-0.125467	-0.0127615	-17433.2	0.339568	16.231	17.3978	17.0609	15.8475	-0.500622	0.333735	1.03723	34.5272	22.6987	43.36	10.8065	0.301549	14.9079	2.83139	25.9234	15.8475	17.6466	26.7255	22.4729	16.3179	-25.9294	31.3394	16.231	16.6707	32.6465	26.0439	25.5168	24.6502	28.4678	27.8885
3369	3343	3871	3957	4204	4553	5003	1514	19	4211	0.0446693	0.117476	0.0637844	1.23246	-0.547113	0.0026054	-0.218925	-0.00912409	-20134.5	0.39955	15.8169	17.1032	16.5742	14.9524	-0.602696	0.137602	1.07215	36.649	23.2855	43.09	11.4826	0.354816	13.3156	2.85559	25.6095	14.9524	19.7963	26.4462	21.505	15.7015	-27.2049	33.4002	15.8169	16.1394	35.9837	26.6908	24.135	23.333	26.631	26.8256
1060	807	621	585	572	559	521	153	10	267	0.00877893	-0.121612	0.012532	0.822785	-0.810409	0.406007	0.216277	0.153374	255.75	0.232278	8.36345	8.0466	8.23766	9.31018	0.600257	0.740476	0.937049	46.0628	26.3669	42.9	5.34848	0.206291	74.7371	2.97637	26.8437	9.31018	19.4328	28.2918	29.8235	8.5316	6.34754	39.9988	8.36345	8.30103	29.6411	18.1261	25.8952	25.7749	28.917	23.6539
831	583	388	374	375	415	372	86	7	118	-0.0615595	-0.259179	-0.0878555	0.559767	-0.852487	0.488069	0.504516	0.204103	1153.75	-0.444552	7.20483	7.19197	7.45904	8.3539	0.796083	0.787337	0.824143	21.7445	20.0016	42.61	4.414	-0.39485	46.3412	2.71449	20.3872	8.3539	15.4729	17.7716	21.506	7.29363	10.4883	39.697	7.20483	7.21125	20.1037	27.2436	23.9	22.9983	26.2986	26.8752
707	481	301	314	229	228	167	63	9	43	-0.243802	-0.448795	-0.347841	0.502732	-0.869023	0.619469	0.678883	0.193029	1392	-0.703278	6.79688	5.50688	6.10911	7.83517	0.878884	0.852458	0.795144	49.4812	27.6789	42.58	3.97906	-0.624711	32.5381	3.02494	28.7901	7.83517	19.1272	31.2481	32.6714	6.70176	11.1655	35.8181	6.79688	6.11803	38.422	49.3532	33.8777	29.8942	33.538	43.2648
852	643	369	359	327	350	298	67	9	77	-0.123288	-0.38131	-0.17594	0.486111	-0.895801	0.578082	0.642401	0.214058	1728.25	-0.560344	7.10719	6.67942	7.0473	8.63118	0.86285	0.833035	0.786282	21.6227	19.9828	42.17	4.06155	-0.497706	42.8248	2.71364	20.0524	8.63118	30.6029	19.782	22.8818	7.17258	12.0006	42.6212	7.10719	6.88942	25.6149	29.9955	24.6986	22.5671	26.3809	28.4405
929	859	573	657	420	425	325	88	8	145	-0.238919	-0.418662	-0.341018	0.548295	-0.897555	0.416499	0.63308	0.0556242	2177.25	-0.698649	8.69338	6.87534	7.51847	9.506	0.858657	0.746801	0.818474	98.4526	57.7624	42.16	4.44796	-0.620512	27.0399	3.86558	67.1151	9.506	70.3443	58.6235	62.0369	8.30587	12.9609	55.0471	8.69338	7.48887	72.4647	71.2449	61.2282	55.1182	55.1347	67.6411
1405	1089	889	871	919	975	863	220	8	467	0.20054	0.101485	0.286315	0.629213	-0.79798	0.481687	0.129082	0.212926	-622	0.659095	9.55006	9.52073	9.91596	10.2883	0.505385	0.78389	0.856905	131.599	90.1005	42.02	6.03681	0.585329	82.4035	4.48307	68.5164	10.2883	9.47956	99.0044	83.4643	9.6154	-8.53618	23.3705	9.55006	9.72236	30.068	26.2382	86.3805	86.9238	110.237	95.6478
804	625	434	434	320	317	268	62	7	94	-0.202216	-0.369113	-0.288593	0.5	-0.9008	0.507853	0.625488	0.114286	1593.5	-0.660839	7.57117	6.44731	6.81846	8.54988	0.85521	0.797834	0.793701	34.7956	22.7707	42	3.95789	-0.586956	36.2707	2.83439	23.1976	8.54988	41.1626	24.7772	26.6662	7.57117	11.6802	45.3695	7.57117	6.8399	46.0313	36.0649	26.9556	24.4796	28.7468	33.4202
866	580	380	354	362	395	352	81	9	110	-0.0872675	-0.290323	-0.124542	0.548589	-0.860345	0.487179	0.536424	0.218509	1237.75	-0.499388	7.07404	7.0607	7.33723	8.33955	0.812524	0.786858	0.81862	12.7386	18.9648	42	4.32675	-0.443558	43.5545	2.66675	19.2785	8.33955	2.21511	12.9876	16.4662	7.24316	10.7369	39.8832	7.07404	7.12694	17.9503	18.6369	23.4296	22.4173	25.6417	21.4007
1175	964	766	726	638	652	614	101	9	306	-0.132299	-0.243069	-0.188863	0.752981	-0.895228	0.31467	0.371266	0.0698239	1099.75	-0.57374	8.98764	8.49942	8.67127	9.87853	0.718723	0.680171	0.909763	25.0745	20.5657	41.99	4.65701	-0.509548	33.5555	2.73977	20.9949	9.87853	29.9736	20.9629	22.1318	9.14976	10.322	54.0739	8.98764	8.60875	42.5981	18.541	21.3538	21.4142	22.5992	18.9778
858	592	419	428	297	329	283	85	9	156	-0.173669	-0.334837	-0.247851	1.0339	-0.856419	0.308204	0.319955	0.158212	645.25	-0.628151	7.53612	6.56541	6.90344	8.39667	0.683959	0.67548	1.01117	48.7322	27.3826	41.88	4.39683	-0.557923	32.8992	3.01411	28.1107	8.39667	9.6304	29.5168	30.9145	7.48292	8.64124	36.7375	7.53612	6.67194	50.8565	41.8981	31.58	28.332	32.8994	39.4408
721	503	329	325	324	359	299	66	7	74	-0.0734095	-0.278272	-0.104756	0.394366	-0.868787	0.586592	0.635772	0.208659	1289.5	-0.471403	6.87534	6.68688	7.10719	7.95285	0.859872	0.837103	0.733331	33.719	22.4856	41.86	4.04124	-0.418714	50.2385	2.8225	22.9445	7.95285	23.5949	22.8971	26.7413	6.90344	10.8845	37.0536	6.87534	6.86829	18.0108	34.7171	26.643	25.3906	29.7946	33.5434
726	519	345	333	306	297	256	75	20	104	-0.134868	-0.327366	-0.192457	0.593156	-0.855491	0.433243	0.537778	0.178082	1100.25	-0.577357	6.9313	6.3496	6.67194	8.03629	0.813207	0.756677	0.840213	23.2598	20.2462	41.75	4.21716	-0.512826	39.195	2.72551	20.6691	8.03629	28.7696	20.3599	22.7855	7.01358	10.3236	36.6439	6.9313	6.73866	23.5668	28.4347	25.2895	23.6819	27.741	28.6442
702	483	298	311	269	299	229	46	8	46	-0.120301	-0.34728	-0.171651	0.367521	-0.904762	0.671429	0.697715	0.221932	1403	-0.555754	6.77517	6.11803	6.68688	7.84601	0.886937	0.875655	0.716299	51.1393	28.3523	41.65	3.58305	-0.493654	50.9488	3.04927	29.5762	7.84601	22.227	32.5397	35.7777	6.67942	11.1949	35.6736	6.77517	6.45531	26.1882	49.5148	33.2912	30.4669	36.0749	45.2704
3594	3395	3500	3662	4106	4490	4693	1073	12	3132	0.107029	0.122058	0.152829	0.943996	-0.683947	0.161558	-0.093579	0.0624791	-12501.8	0.534649	15.4137	16.7424	16.4974	15.0296	-0.454004	0.54464	0.980972	61.7123	33.2153	41.59	10.2376	0.474789	14.0357	3.2145	22.8628	15.0296	18.6332	22.1299	16.7556	15.1829	-23.209	32.3436	15.4137	16.013	31.0507	28.9218	25.3497	26.9227	26.1571	27.6869
773	513	310	296	275	278	228	49	6	50	-0.161049	-0.39213	-0.229793	0.352679	-0.904483	0.635036	0.733108	0.233148	1542.5	-0.612509	6.66444	6.10911	6.52652	8.0052	0.901687	0.85954	0.706523	15.4688	19.2037	41.21	3.65931	-0.544067	44.7976	2.6779	19.316	8.0052	7.33662	14.2988	17.9582	6.7679	11.5542	37.5178	6.66444	6.50296	20.6167	26.4735	25.1835	23.0851	27.0522	27.0306
1646	1457	1358	1319	1385	1604	2006	383	11	1612	0.0704997	0.0354187	0.100659	1.2078	-0.737131	-0.0151134	-0.129109	0.0833615	-6552	0.465176	10.9668	12.6118	11.7058	11.3367	-0.50542	-0.247241	1.06496	12.2547	18.9293	41.2	7.26217	0.413107	48.3655	2.66509	27.0204	11.3367	28.2908	29.0614	32.4152	11.0739	-18.7122	25.4467	10.9668	11.1468	35.6085	22.3314	18.4902	20.1058	16.2702	16.3652
1358	1550	1174	1401	1052	1126	921	99	10	377	-0.110165	-0.24448	-0.157284	0.572795	-0.936129	0.427921	0.483964	-0.0105444	2772	-0.539795	11.1896	9.72941	10.4035	11.5729	0.785123	0.753566	0.830487	143.638	104.24	41.07	4.62607	-0.479382	36.3682	4.70629	126.715	11.5729	84.5887	86.3841	92.7842	10.5493	14.0475	72.5387	11.1896	10.1704	75.7079	73.74	99.5713	96.574	116.134	117.491
967	851	716	723	536	592	506	96	24	271	-0.171849	-0.254237	-0.245315	0.800395	-0.887192	0.302445	0.355096	0.0141136	912.25	-0.626001	8.97524	7.96863	8.39667	9.4764	0.708133	0.671247	0.928471	67.7151	36.4141	40.67	4.57886	-0.555967	30.7887	3.31454	38.4342	9.4764	56.8553	39.6882	41.4073	8.94618	9.6985	51.0667	8.97524	8.1231	59.3595	35.362	35.3777	33.856	41.0051	42.5778
879	767	519	498	436	476	437	71	8	159	-0.175538	-0.356322	-0.250547	0.626374	-0.907432	0.391969	0.541709	0.0898729	1627.75	-0.630419	7.92641	7.58858	7.80793	9.15374	0.815183	0.731842	0.855614	16.9092	19.3562	40.61	4.14082	-0.559917	36.1411	2.68497	19.4268	9.15374	61.3184	21.9314	23.7323	8.03629	11.7633	49.5596	7.92641	7.58279	35.1377	24.0486	22.6403	21.5545	24.5663	23.7388
1066	910	754	711	682	707	671	113	9	412	-0.108009	-0.199736	-0.154188	0.85173	-0.875824	0.191364	0.275403	0.0518705	287.25	-0.536229	8.92531	8.75469	8.90854	9.69052	0.650613	0.576262	0.94791	28.7916	21.3106	40.61	4.83459	-0.476233	33.9446	2.77246	22.2897	9.69052	44.0929	23.896	25.2634	9.10173	6.59812	44.6735	8.92531	8.80227	34.5544	17.3188	21.4379	21.9818	22.2556	17.9692
2472	2395	2495	2538	3462	3946	4252	589	16	2651	0.152801	0.172712	0.218184	1.00324	-0.754071	0.123057	-0.17428	0.0807774	-12183	0.602016	13.6405	16.2006	15.8023	13.3794	-0.558577	0.497395	1.00108	35.3688	22.9267	40.15	8.38247	0.534617	33.7365	2.84084	25.589	13.3794	25.7459	26.9063	28.3495	13.563	-23.0101	32.3508	13.6405	15.1278	21.8936	28.9711	22.113	21.7649	23.8565	25.9439
2414	2341	2298	2268	2204	2264	2252	1322	1014	1876	-0.0372376	-0.0464908	-0.0531702	0.982654	-0.435284	0.0641058	0.0552175	-0.00535929	-4712.25	-0.37603	13.1386	13.1076	13.1308	13.278	0.380796	0.40022	0.994184	33.0224	22.3065	39.92	10.9752	-0.333934	30.4557	2.81499	25.3308	13.278	26.6419	26.6057	27.2905	13.1962	-16.7652	31.927	13.1386	13.0138	48.338	24.567	19.5694	21.5333	16.9965	18.2217
8129	8493	9140	9191	9254	9441	9643	4583	140	3710	-0.0236309	0.013073	-0.0337441	0.660358	-0.460379	0.402961	0.192	-0.0407948	-1438	-0.323146	20.947	21.2849	21.1352	20.4027	0.5769	0.73862	0.870816	54.086	29.6088	39.67	16.6105	-0.286963	145.877	3.09367	26.0041	20.4027	32.3682	27.8555	-9.08914	20.9081	-11.2872	7.49549	20.947	20.9947	19.852	28.6868	39.5644	36.8434	44.1959	41.6709
770	583	427	532	438	428	382	114	8	301	-0.109091	-0.259179	-0.155695	1.11953	-0.80446	0.0652174	0.205791	0.131673	-117.5	-0.537971	8.10284	7.25584	7.53612	8.3539	0.590394	0.40252	1.03835	101.308	60.1676	39.57	4.84881	-0.477818	33.6471	3.91851	49.371	8.3539	38.0185	57.3876	60.9107	7.53025	-4.89793	11.818	8.10284	7.59436	41.6549	96.1538	63.4788	62.0445	77.3298	90.0616
723	493	348	343	278	294	234	56	6	88	-0.204152	-0.363762	-0.291314	0.647826	-0.88641	0.446541	0.535826	0.155852	1076.5	-0.662909	7	6.16224	6.6494	7.89979	0.812221	0.764341	0.865272	43.7943	25.5531	39.37	3.82586	-0.588823	37.9967	2.94542	26.3006	7.89979	18.1107	27.3514	29.6048	7.03385	10.2488	36.6433	7	6.52652	32.831	33.7593	30.3632	27.9159	33.1455	35.6436
700	507	327	304	242	239	207	61	9	94	-0.243346	-0.436261	-0.347216	0.763819	-0.879684	0.358362	0.538695	0.157759	1111.75	-0.702856	6.72395	5.91548	6.20582	7.97387	0.813669	0.710298	0.914107	10.6665	18.8272	38.86	3.9365	-0.624321	33.1486	2.66029	19.2419	7.97387	34.3237	19.2469	20.2512	6.88942	10.3594	35.5409	6.72395	6.23168	31.3445	19.3071	25.6735	22.9138	26.5906	22.5415
1912	1780	1552	1548	1559	1614	1555	1102	1007	1189	-0.00096743	-0.0693902	-0.0013813	0.830859	-0.380899	0.131483	0.160743	0.0543793	-1685	-0.111369	11.568	11.5854	11.7301	12.1192	0.543723	0.508499	0.940104	42.5817	25.1366	38.85	10.3291	-0.0989023	21.506	2.92933	25.0265	12.1192	30.2241	26.433	24.5304	11.5779	-11.8996	30.1462	11.568	11.5953	41.2287	27.7614	20.3499	22.389	17.9341	20.7474
795	613	354	300	249	247	198	64	9	65	-0.277978	-0.507995	-0.396647	0.585	-0.895595	0.509434	0.679452	0.168526	1755.25	-0.734742	6.69433	5.82848	6.27431	8.49481	0.87913	0.798661	0.836345	1.65795	18.6684	38.71	4	-0.652635	29.7275	2.65279	18.6123	8.49481	40.0539	19.2482	19.2882	7.07404	12.0628	41.8645	6.69433	6.29119	28.1866	-4.45558	25.3915	22.0332	24.9093	5.50328
756	489	306	273	244	241	175	51	13	105	-0.243902	-0.448889	-0.34799	0.564516	-0.895706	0.278351	0.646465	0.212355	1200.75	-0.703378	6.48715	5.59344	6.22308	7.87837	0.864666	0.652926	0.826467	35.4048	22.9366	38.67	3.70843	-0.624797	36.3095	2.84125	23.4512	7.87837	2.86253	20.5404	22.3539	6.73866	10.6288	34.7648	6.48715	6.2488	21.4494	9.60866	28.931	25.8796	30.075	19.261
1115	930	830	764	668	709	663	129	12	425	-0.118598	-0.174242	-0.16931	0.948012	-0.86129	0.212234	0.2	0.0317877	-92.25	-0.553215	9.14179	8.71976	8.91693	9.761	0.584804	0.596492	0.982361	31.9259	22.0333	38.54	5.05277	-0.491315	30.2283	2.80345	24.0956	9.761	36.4431	25.6025	26.1664	9.3978	-4.51844	26.6252	9.14179	8.74162	44.1068	10.7816	21.9589	22.3047	23.1902	14.5929
2297	2185	2080	2073	2051	2108	2109	1273	1009	1727	-0.0402601	-0.0648148	-0.0574852	1.05315	-0.417391	0.0526604	0.0389919	0.00668577	-4573	-0.385939	12.7507	12.8241	12.822	12.9763	0.339098	0.374825	1.01741	28.8267	21.3182	38.41	10.8378	-0.342735	29.3085	2.77279	25.5761	12.9763	26.175	26.9186	27.3406	12.765	-16.5984	31.2076	12.7507	12.7054	45.623	26.4423	19.2308	21.1118	16.7134	19.0768
1106	889	646	596	614	664	592	110	11	253	-0.0884583	-0.243357	-0.126273	0.628466	-0.876265	0.36272	0.446705	0.120789	1365	-0.501691	8.41554	8.39667	8.72414	9.6154	0.764434	0.713166	0.856565	27.3212	21.0014	38.22	4.79142	-0.445567	36.8621	2.75899	21.321	9.6154	28.9393	21.273	23.2195	8.64459	11.0929	52.5147	8.41554	8.49942	26.1286	12.5319	21.7896	21.8957	23.1641	15.6936
1880	1741	1552	1571	1527	1567	1489	1709	1009	1311	-0.0284957	-0.0857499	-0.0406861	0.959072	-0.0183802	0.0558156	0.106451	0.0375194	-2631.75	-0.343939	11.625	11.4191	11.6151	12.03	0.473932	0.382166	0.986167	25.6405	20.6713	38.21	11.9559	-0.30544	41.1097	2.74445	25.2936	12.03	30.1213	26.7881	29.5103	11.5779	-13.8064	28.9847	11.625	11.5154	45.1092	30.9715	18.8245	20.6264	16.3192	21.2867
1026	797	668	639	609	671	646	220	81	431	-0.0544594	-0.141834	-0.0777417	1.12521	-0.723965	0.163107	0.0836166	0.0976022	-843	-0.426794	8.61325	8.64459	8.75469	9.27156	0.437285	0.546375	1.04011	26.5723	20.8512	37.96	6.03681	-0.379045	27.479	2.75239	24.5421	9.27156	25.7387	25.4166	25.2357	8.74162	-9.44661	16.6324	8.61325	8.47629	33.1923	21.6681	21.7453	22.2066	22.7757	20.9755
841	627	460	431	368	392	344	91	19	161	-0.181001	-0.325581	-0.258328	0.818182	-0.854864	0.329167	0.412162	0.115385	941.5	-0.636879	7.55369	7.0068	7.31861	8.55899	0.744199	0.69046	0.935298	25.538	20.6519	37.93	4.49794	-0.565667	30.9843	2.7436	21.1741	8.55899	28.6514	21.035	21.5326	7.71944	9.80107	41.7176	7.55369	7.1661	34.0247	18.6955	24.4573	23.0741	26.8239	22.358
762	568	376	388	332	329	284	64	8	77	-0.164087	-0.355609	-0.234161	0.451852	-0.887324	0.556196	0.646377	0.156951	1504.75	-0.616365	7.29363	6.57314	6.90344	8.28164	0.864627	0.822386	0.767359	31.0888	21.8318	37.89	4	-0.547467	39.2578	2.79488	22.1723	8.28164	35.1287	23.0753	25.51	7.21765	11.4592	41.5702	7.29363	6.92436	31.6053	45.2463	25.9697	24.3033	28.5757	37.6821
1975	1908	1633	1630	1476	1478	1428	1093	1008	1212	-0.0729304	-0.149744	-0.10413	0.91708	-0.427149	0.0758673	0.191755	0.0180397	-1229.75	-0.470463	11.7687	11.261	11.3909	12.403	0.576654	0.423336	0.971559	36.1708	23.1498	37.84	10.3009	-0.417801	25.7206	2.85003	24.8214	12.403	34.2598	26.4032	25.808	11.7759	-10.7137	31.7141	11.7687	11.3858	53.7668	27.6875	19.6268	21.5123	17.273	20.203
831	606	469	431	398	403	375	79	7	209	-0.163772	-0.28526	-0.233742	0.818991	-0.869637	0.234432	0.37415	0.109212	661	-0.615997	7.55369	7.21125	7.38644	8.46235	0.720579	0.616603	0.935606	14.357	19.0985	37.74	4.29084	-0.547116	35.2095	2.673	19.9302	8.46235	24.3597	18.6569	20.1749	7.76946	8.71098	39.4173	7.55369	7.35576	28.2209	13.5713	22.9844	22.3113	25.0934	17.8599
785	553	358	335	314	319	266	80	10	89	-0.154839	-0.357055	-0.220957	0.503817	-0.855335	0.492877	0.614599	0.187748	1373.75	-0.604555	6.94515	6.43123	6.83277	8.20808	0.850218	0.789914	0.795715	19.3788	19.6601	37.74	4.30887	-0.536982	35.8344	2.69895	19.8991	8.20808	20.1151	17.8786	19.5382	7.10059	11.1165	39.556	6.94515	6.79688	22.3973	20.2396	24.7151	23.0256	26.913	23.346
1449	1381	1187	1144	1036	1066	1039	261	97	667	-0.0825353	-0.157101	-0.117837	0.860835	-0.811007	0.20263	0.229194	0.0167737	-25.75	-0.490262	10.4586	10.1283	10.2153	11.1361	0.611976	0.587356	0.951276	30.8063	21.7652	37.71	6.39068	-0.435392	21.6121	2.79204	23.8208	11.1361	48.1742	25.7468	23.7958	10.5881	-2.95297	35.5521	10.4586	10.1186	48.2058	20.9204	19.9258	21.1477	19.1163	17.7127
745	571	346	315	253	254	210	56	9	84	-0.21831	-0.440101	-0.311512	0.666667	-0.901926	0.45098	0.588317	0.165763	1405.5	-0.677888	6.80409	5.94392	6.33303	8.29619	0.837922	0.766866	0.87358	14.6172	19.1221	37.68	3.82586	-0.602131	36.7524	2.67411	19.3194	8.29619	43.0779	20.4338	22.3451	7.02035	11.2015	39.0211	6.80409	6.3247	31.536	13.5698	25.6224	22.5714	25.9196	18.5064
768	562	362	365	318	318	271	63	7	67	-0.1584	-0.362424	-0.22604	0.441065	-0.8879	0.593939	0.657817	0.174929	1534	-0.609156	7.14657	6.47127	6.82562	8.25237	0.869698	0.840583	0.761203	26.7819	20.8928	37.38	3.97906	-0.541068	40.1468	2.75422	21.1334	8.25237	30.345	21.1965	23.7999	7.12694	11.533	40.9213	7.14657	6.82562	29.0213	39.4014	25.5292	23.7261	27.8595	34.3909
2111	1926	1871	1902	1898	1866	1891	521	12	1653	0.0320745	0.0175976	0.0457973	1.04712	-0.729491	0.09375	-0.0405978	0.0463812	-5696.5	0.357778	12.39	12.366	12.3113	12.4419	-0.34369	0.45428	1.01547	64.4832	34.6525	37.33	8.0466	0.317726	33.7788	3.2602	25.0036	12.4419	23.5592	25.8874	27.2963	12.3223	-17.8595	29.8738	12.39	12.3813	44.0389	30.6754	25.0717	27.957	22.4135	25.762
750	559	390	397	386	411	345	64	6	121	-0.0729023	-0.247768	-0.104043	0.590504	-0.88551	0.471616	0.474934	0.164435	1023	-0.470332	7.3496	7.01358	7.43499	8.23766	0.780209	0.778388	0.83896	52.6244	28.976	37.29	4	-0.417747	51.013	3.07147	30.0808	8.23766	36.1838	33.153	36.3544	7.30614	10.0761	38.7431	7.3496	7.28108	23.1408	41.4325	31.036	30.0621	35.7732	41.435
1164	1003	733	755	748	831	786	210	103	304	-0.0382436	-0.192628	-0.0545953	0.665685	-0.790628	0.381485	0.378694	0.113932	1198.25	-0.37936	9.10575	9.22871	9.40157	10.01	0.723485	0.725258	0.873151	37.5535	23.5477	37.26	5.94392	-0.336914	30.8113	2.86626	24.1137	10.01	40.8554	25.8455	26.5693	9.01643	10.6214	53.9409	9.10575	9.07752	32.915	40.4285	22.288	22.913	23.343	31.4551
2385	2308	2051	2006	2257	2320	2422	814	13	1442	0.116329	0.0577669	0.166103	0.778464	-0.647314	0.2849	0.0672832	0.0962767	-3449.25	0.5497	12.6118	13.4294	13.2382	13.2153	0.406726	0.658007	0.919912	60.5989	32.6569	37.18	9.33702	0.488161	21.3655	3.19638	25.6713	13.2153	26.8349	27.0985	25.2319	12.7054	-15.1092	31.6066	12.6118	13.1173	32.5851	23.0911	23.5104	26.2796	20.4807	20.0369
806	559	362	334	288	291	242	64	7	87	-0.227119	-0.420584	-0.32409	0.561404	-0.88551	0.447619	0.627365	0.176337	1427.75	-0.686892	6.93823	6.23168	6.62671	8.23766	0.856065	0.764956	0.824945	15.6354	19.2204	37.17	4	-0.610123	33.5799	2.67868	19.4067	8.23766	14.7892	16.0896	17.1146	7.12694	11.2603	40.1883	6.93823	6.60385	27.886	16.571	24.9211	22.7184	26.5692	20.8737
823	617	446	425	456	500	467	165	9	209	-0.039627	-0.199223	-0.0565592	0.815534	-0.732577	0.326892	0.294858	0.16126	446.25	-0.383855	7.51847	7.7584	7.93701	8.51324	0.665586	0.688866	0.934288	18.4783	19.5431	36.93	5.48481	-0.340929	35.6688	2.69359	20.582	8.51324	31.3264	20.5858	22.2535	7.64032	7.64175	35.7207	7.51847	7.697	18.0502	23.2825	22.5084	22.4865	24.2392	23.0459
2074	2013	1708	1717	1656	1726	1707	1127	1027	1295	-0.0338983	-0.115544	-0.0484005	0.87782	-0.440139	0.104116	0.179262	0.0358453	-1512.25	-0.364432	11.9745	11.9512	11.9954	12.6264	0.563849	0.470442	0.957492	29.7811	21.5294	36.82	10.4066	-0.323638	25.2276	2.78192	24.8448	12.6264	32.7121	26.3457	25.6005	11.9535	-11.4782	31.707	11.9745	11.831	46.937	28.9538	19.0293	21.0167	16.1568	20.0591
903	723	574	554	422	448	380	84	10	188	-0.199582	-0.307414	-0.284876	0.631854	-0.883817	0.341506	0.498446	0.0566968	1311.25	-0.657989	8.21303	7.24316	7.65172	8.97524	0.792877	0.698982	0.858102	45.0502	25.9981	36.81	4.37952	-0.584396	30.889	2.96242	26.8417	8.97524	40.2839	29.0868	30.0339	8.31069	10.9453	49.5701	8.21303	7.50074	49.5659	24.918	27.7186	26.0778	30.8866	29.1406
1187	1123	927	1058	864	908	813	149	13	520	-0.107527	-0.20107	-0.153509	0.892905	-0.86732	0.179163	0.254749	0.0211193	207.25	-0.535441	10.1897	9.33319	9.68342	10.3943	0.633924	0.563745	0.962946	102.131	60.8744	36.7	5.30146	-0.475524	28.639	3.93379	62.7296	10.3943	58.9126	62.4203	66.4275	9.75049	5.91786	47.3025	10.1897	9.52441	58.1807	65.5346	55.4322	55.4655	68.7603	76.5739
938	814	496	522	457	520	495	95	9	127	-0.142857	-0.372681	-0.203899	0.61828	-0.883292	0.490982	0.559387	0.138141	1893.75	-0.58858	8.05175	7.91046	8.04145	9.33702	0.823956	0.7889	0.851912	20.1549	19.7667	36.57	4.5629	-0.522758	33.6832	2.70382	19.7343	9.33702	55.7735	21.9271	23.1615	7.91578	12.372	50.231	8.05175	7.70262	36.1209	48.8063	22.6304	21.5561	24.557	36.2337
921	677	490	430	397	413	376	70	8	186	-0.132948	-0.287072	-0.189756	0.818667	-0.896603	0.336898	0.376016	0.13884	874.75	-0.574643	7.54784	7.21765	7.44703	8.78071	0.721776	0.695824	0.935483	8.9221	18.7407	36.5	4.12129	-0.51038	40.8019	2.65621	19.3751	8.78071	19.7438	17.0227	19.8101	7.88374	9.56374	42.5153	7.54784	7.3496	28.1898	1.50456	22.7832	21.6925	24.7549	9.6135
859	733	508	558	359	351	264	61	5	97	-0.292621	-0.450049	-0.417635	0.460432	-0.91678	0.482667	0.702671	0.0562007	2083.75	-0.747479	8.23275	6.41507	7.054	9.01643	0.889032	0.784421	0.772186	81.5525	44.9957	36.2	3.9365	-0.663899	29.5205	3.55678	50.7497	9.01643	57.8757	51.2749	53.9651	7.97911	12.7727	51.8765	8.23275	7.10719	66.2271	60.2413	48.4508	43.3944	46.4658	57.4224
1005	933	632	634	616	657	607	158	48	220	-0.0621849	-0.251509	-0.0887681	0.577061	-0.830654	0.434447	0.486853	0.105766	1699.5	-0.446086	8.59072	8.467	8.69338	9.77148	0.786682	0.757377	0.832544	29.9277	21.5626	36	5.40612	-0.396182	32.9043	2.78334	21.815	9.77148	65.8719	23.9798	25.1094	8.58168	11.9337	54.3137	8.59072	8.50864	31.5269	34.4457	22.1022	22.0332	23.7115	28.7413
2634	2762	3204	3379	3699	3960	4253	1219	22	3915	0.0561202	0.129668	0.0801346	1.34449	-0.558653	-0.044	-0.271432	-0.0149679	-19894.5	0.431128	15.0059	16.2019	15.8209	14.0305	-0.647471	-0.353035	1.1037	86.0892	48.1761	35.87	10.6824	0.38286	13.4651	3.63868	21.0879	14.0305	30.0657	21.1001	15.3047	14.7423	-27.0964	34.4306	15.0059	15.4654	34.1968	30.8135	32.4754	36.8157	28.1385	30.2331
5196	4780	4732	4895	4849	4863	4903	1625	18	3782	0.0836561	0.078643	0.119456	0.927806	-0.660042	0.193431	-0.0413157	0.0655608	-13447.5	0.492496	16.9792	16.9885	16.9421	16.8452	-0.345704	0.57833	0.975332	80.7384	44.4442	35.81	11.7567	0.437353	10.5666	3.54219	23.1781	16.8452	31.9914	24.0965	17.5358	16.7886	-23.7801	29.0815	16.9792	16.9259	42.6479	25.027	31.1611	34.3289	30.4884	28.8912
2124	2098	2170	2109	2317	2473	2471	327	10	1802	0.0404599	0.0572905	0.0577712	1.11092	-0.844137	0.132611	-0.109508	0.0155382	-7607.75	0.386578	12.8241	13.5194	13.5231	12.8017	-0.478426	0.509949	1.03569	63.6572	34.217	35.48	6.88942	0.343301	52.1014	3.24649	24.2159	12.8017	33.9264	25.6013	29.3483	12.9465	-19.6676	31.0796	12.8241	13.2325	34.8228	22.002	24.336	27.431	20.6471	19.5292
7317	7692	8303	8342	8805	9617	9876	1634	21	2956	-0.00997446	0.0282357	-0.0142432	0.65524	-0.787572	0.467147	0.181113	-0.035868	-727.75	-0.242402	20.281	21.4549	21.2657	19.74	0.565783	0.775922	0.868561	72.7487	39.3408	35.46	11.7783	-0.21526	35.3434	3.40106	31.0864	19.74	23.6041	34.781	36.8574	20.2494	-8.99485	14.7774	20.281	20.6495	16.5507	28.2123	38.0655	36.7247	44.7175	41.8333
963	828	478	537	410	421	360	65	8	97	-0.170135	-0.419023	-0.242825	0.457227	-0.921498	0.555046	0.684639	0.153233	2340.5	-0.623875	8.12814	7.11379	7.49481	9.39024	0.881361	0.821819	0.77039	55.6438	30.3038	35.05	4.02073	-0.554112	38.3559	3.11769	32.3843	9.39024	52.0252	34.5348	36.9884	7.81885	13.2771	51.9568	8.12814	7.42896	48.5479	66.7652	31.7969	28.7179	33.5975	49.9211
1287	947	613	648	732	680	586	135	9	292	0.337297	0.132784	0.481549	0.48747	-0.857445	0.618051	0.221935	0.346133	263.75	0.783815	8.6535	8.36821	8.79366	9.82012	0.605446	0.851807	0.787014	149.319	111.355	34.99	5.12993	0.696099	114.796	4.81101	118.692	9.82012	2.34241	199.009	125.576	8.49481	6.41304	39.8671	8.6535	9.01233	21.1888	48.6016	114.482	112.446	138.275	129.694
913	843	471	503	398	431	364	62	7	68	-0.147381	-0.413244	-0.210351	0.345714	-0.926453	0.674641	0.748963	0.145578	2613.5	-0.594723	7.95285	7.14004	7.55369	9.44661	0.908141	0.87705	0.701842	41.8113	24.8787	34.77	3.95789	-0.528219	41.6343	2.91928	25.6536	9.44661	71.2274	26.6145	29.4094	7.78049	13.7744	53.0576	7.95285	7.35576	43.748	53.0684	27.1967	24.4964	28.6391	41.112
1914	1823	1571	1585	1439	1457	1396	1084	1018	1162	-0.0665309	-0.140088	-0.0949923	0.901818	-0.405376	0.0839574	0.190336	0.022858	-1207.25	-0.456278	11.6594	11.1762	11.3367	12.216	0.575229	0.437878	0.966139	41.566	24.7977	34.74	10.2725	-0.405205	25.3103	2.91611	25.0183	12.216	33.619	26.6236	25.9301	11.625	-10.6479	31.2463	11.6594	11.2898	53.0545	30.1818	20.3623	22.2125	18.4176	22.449
866	732	557	658	669	780	1027	172	11	580	-0.27606	-0.396947	-0.39402	1.78165	-0.765027	-0.294643	0.130502	0.0296167	-998	-0.733116	8.69778	10.0892	9.20516	9.01233	0.507231	-0.665424	1.21229	9.63777	18.773	34.74	5.5613	-0.65113	14.6561	2.65773	24.7344	9.01233	55.2022	26.6887	22.3305	8.22783	-9.99333	12.2291	8.69778	8.74598	28.6782	79.7399	20.2583	21.4299	19.6776	43.6676
1792	1647	1454	1497	1349	1359	1291	1081	1011	1141	-0.0563022	-0.118126	-0.0803871	0.91455	-0.343655	0.0647541	0.161905	0.0305051	-1626.5	-0.431581	11.4395	10.8887	11.0766	11.8095	0.545029	0.401565	0.970664	51.4303	28.473	34.71	10.263	-0.383273	24.9478	3.05359	25.6188	11.8095	30.9772	27.2757	26.5412	11.3289	-11.7603	29.3052	11.4395	11.0494	53.1149	35.2058	22.5095	24.3407	21.5487	27.4868
842	577	383	349	322	314	262	60	6	67	-0.187597	-0.375447	-0.267711	0.419847	-0.896014	0.592705	0.679767	0.180749	1618.25	-0.644499	7.04058	6.39883	6.79688	8.32515	0.879266	0.840001	0.748796	11.3006	18.8653	34.68	3.91487	-0.572456	38.2167	2.66208	18.91	8.32515	9.23459	14.0598	16.2971	7.26217	11.7404	42.7431	7.04058	6.85412	24.207	12.9586	24.0305	22.3835	26.0562	18.2289
808	602	404	401	418	451	407	86	17	102	-0.0345711	-0.229826	-0.0493404	0.496021	-0.857143	0.574113	0.525982	0.189162	1285.25	-0.366776	7.3742	7.4108	7.66877	8.44369	0.807217	0.831124	0.79159	27.8475	21.1099	34.6	4.414	-0.325765	52.1289	2.76373	21.4705	8.44369	31.1066	21.7399	25.8064	7.39254	10.8725	41.6088	7.3742	7.47697	18.8697	34.5817	24.0096	23.5458	26.457	30.9102
1205	1084	863	845	812	882	844	110	8	429	-0.046695	-0.159358	-0.0666631	0.765903	-0.898524	0.293827	0.285884	0.0712941	551.75	-0.405473	9.45407	9.45034	9.59009	10.2725	0.658764	0.66481	0.914937	37.2667	23.4638	34.53	4.79142	-0.3601	43.489	2.86286	24.1163	10.2725	47.7395	26.0559	29.0952	9.52073	8.20189	51.1838	9.45407	9.32936	37.3441	26.2405	21.8181	22.5932	22.4939	23.3843
744	532	396	370	355	367	341	74	11	170	-0.121813	-0.263658	-0.173844	0.845161	-0.860902	0.291667	0.34005	0.141928	535	-0.55811	7.17905	6.98637	7.1596	8.10284	0.697988	0.663176	0.945467	15.3123	19.1882	34.48	4.19834	-0.495714	40.9596	2.67718	20.1598	8.10284	27.1541	19.4236	22.1997	7.34342	8.11804	34.2062	7.17905	7.0807	22.7325	19.0783	23.6824	22.9147	26.028	21.9663
841	784	589	644	522	548	592	164	6	108	-0.242616	-0.371829	-0.346299	0.649025	-0.790816	0.537473	0.54179	0.00925147	1817.25	-0.702237	8.63566	8.39667	8.18327	9.22087	0.815224	0.813053	0.865806	7.68537	18.6956	34.34	5.4737	-0.623696	17.066	2.65407	18.6026	9.22087	79.0932	21.6719	17.4969	8.38247	12.2031	53.5318	8.63566	8.05175	47.4974	58.0096	21.3456	21.1655	22.7389	38.685
1337	1177	1104	1117	1170	1318	1335	278	9	973	0.0173565	-0.0146552	0.0247803	1.18198	-0.763806	0.0803403	-0.0688291	0.0580205	-3657.5	0.291543	10.3757	11.011	10.9641	10.5583	-0.409818	0.431497	1.05731	29.3731	21.4382	33.67	6.52652	0.258913	54.6495	2.77798	25.38	10.5583	37.4723	27.2523	30.9112	10.3353	-15.4074	22.7646	10.3757	10.5373	33.9163	33.0326	19.4404	21.3047	17.056	22.9484
747	507	332	295	267	297	258	71	9	115	-0.144828	-0.343046	-0.206661	0.83871	-0.859961	0.366391	0.418182	0.199518	817.75	-0.591225	6.65693	6.3661	6.67194	7.97387	0.747805	0.715564	0.943055	10.1209	18.7973	33.64	4.14082	-0.52515	39.2108	2.65888	19.4859	7.97387	14.8142	16.22	18.6758	6.92436	9.35133	33.3026	6.65693	6.43928	22.1851	7.85797	25.072	22.8962	26.802	15.5294
1080	966	707	689	563	562	497	106	10	296	-0.164745	-0.311609	-0.235172	0.769231	-0.890269	0.262765	0.424779	0.0576475	1363.25	-0.617251	8.83228	7.9211	8.25237	9.88536	0.751717	0.640505	0.91626	45.1232	26.0243	33.64	4.73262	-0.548198	29.5814	2.96342	26.8823	9.88536	53.2614	28.8559	29.4864	8.90854	11.0881	54.4173	8.83228	8.25726	48.3088	26.161	25.7354	24.6613	28.6878	28.1246
748	525	336	333	295	301	255	57	5	69	-0.150685	-0.358344	-0.21502	0.479839	-0.891429	0.564669	0.630435	0.194245	1372.25	-0.599092	6.9313	6.34133	6.70176	8.06714	0.857459	0.826541	0.782886	25.2358	20.5955	33.64	3.8485	-0.532137	42.9454	2.7411	20.885	8.06714	22.4884	19.7401	22.8613	6.95205	11.1125	38.1287	6.9313	6.65693	25.9906	35.4166	25.7747	23.8548	28.045	32.554
3022	2725	3008	3064	3229	3511	3790	988	19	3322	0.0580867	0.107143	0.0829423	1.2921	-0.637431	0.00850619	-0.23142	0.0310059	-16544.2	0.436106	14.5243	15.5912	15.1988	13.9676	-0.613951	0.204132	1.08918	48.0441	27.1148	33.46	9.95984	0.387281	16.6273	3.00425	23.6571	13.9676	15.9977	22.9978	18.8401	14.4353	-25.481	33.6515	14.5243	14.7805	38.92	28.0065	22.1031	23.5543	21.774	23.8165
856	578	368	352	359	408	344	72	13	76	-0.0744526	-0.29162	-0.106252	0.466877	-0.875433	0.613232	0.592287	0.228916	1431.75	-0.473637	7.0607	7.0068	7.41686	8.32995	0.839803	0.849588	0.775772	27.7489	21.0894	33.43	4.16017	-0.420688	48.1225	2.76283	21.3879	8.32995	4.80873	17.2987	21.3099	7.1661	11.2708	40.5837	7.0607	7.10719	18.0144	25.6422	24.9205	23.7222	27.5468	26.9492
784	644	440	466	314	297	238	66	7	123	-0.251778	-0.420066	-0.35932	0.714829	-0.897516	0.362694	0.548077	0.0866632	1420	-0.710931	7.75286	6.19715	6.67194	8.63566	0.818365	0.713149	0.89413	63.2874	34.024	33.41	4.04124	-0.631451	31.1053	3.24037	36.2947	8.63566	55.4625	37.9085	39.5335	7.6059	11.2399	44.4891	7.75286	6.79688	56.0036	51.2365	37.7852	33.6748	37.8292	47.3333
1009	792	598	576	438	440	378	79	6	192	-0.251046	-0.377391	-0.358333	0.731844	-0.900253	0.301818	0.502846	0.0667187	1502.5	-0.710279	8.32034	7.23043	7.6059	9.25213	0.795204	0.670783	0.901169	41.3499	24.7268	33.37	4.29084	-0.630838	28.0251	2.91333	25.4211	9.25213	29.0238	26.8935	26.9817	8.42494	11.4535	51.8176	8.32034	7.59436	50.7392	24.1323	26.413	24.6866	29.0936	27.2994
1765	1695	1566	1573	1420	1491	1427	261	10	954	-0.0577508	-0.0970874	-0.0824562	0.918996	-0.846018	0.187739	0.13873	0.0044501	-1320.25	-0.435252	11.6299	11.2583	11.4242	11.9231	0.517675	0.572601	0.972235	62.7812	33.7617	33.26	6.39068	-0.386532	24.109	3.23203	27.5007	11.9231	38.7707	29.8867	29.1888	11.6126	-10.9703	30.9496	11.6299	11.2399	53.6358	29.2437	25.7348	27.7623	25.732	27.5344
962	787	569	569	472	468	411	100	10	196	-0.143719	-0.297609	-0.205142	0.631455	-0.872935	0.369775	0.49053	0.0989707	1426.5	-0.589773	8.28649	7.43499	7.76394	9.23262	0.788658	0.71776	0.857922	42.8319	25.2215	33.19	4.64159	-0.523807	32.6091	2.93263	25.9786	9.23262	41.0998	28.0632	29.3241	8.28649	11.257	50.2096	8.28649	7.78599	42.5357	34.2939	26.2982	25.0675	29.3523	32.9865
826	596	393	376	449	475	415	74	6	128	0.0125628	-0.193193	0.0179301	0.528536	-0.875839	0.517891	0.473424	0.219851	1079.25	0.261734	7.21765	7.45904	7.80245	8.41554	0.779381	0.803056	0.808521	56.7325	30.8023	32.91	4.19834	0.232468	104.56	3.13469	32.1941	8.41554	22.315	36.4345	24.3506	7.32483	10.2575	39.3828	7.21765	7.65741	10.2888	25.2229	31.5261	31.262	36.5924	33.7827
986	880	681	702	560	628	460	63	7	103	-0.181266	-0.301775	-0.258752	0.317797	-0.928409	0.641739	0.708738	0.0340426	2518.75	-0.637228	8.88749	7.71944	8.56354	9.58284	0.891583	0.862554	0.682417	94.7259	54.7312	32.76	3.97906	-0.565943	37.884	3.79675	63.9344	9.58284	58.6436	63.7737	67.7071	8.79797	13.6059	60.6001	8.88749	8.24257	51.0957	41.1505	54.2238	51.6788	62.9636	62.758
791	633	402	408	274	286	205	49	8	58	-0.270142	-0.465278	-0.385502	0.363636	-0.922591	0.598616	0.76569	0.119387	1978.75	-0.727795	7.41686	5.89637	6.58853	8.5862	0.914852	0.842784	0.713766	57.8909	31.3441	32.69	3.65931	-0.646444	34.9437	3.15296	33.4849	8.5862	48.8938	36.0966	38.1804	7.38032	12.5544	46.0654	7.41686	6.49507	52.2941	40.459	36.1717	31.3395	33.0912	38.9093
2795	2750	3018	3327	3781	4185	4565	1487	45	3223	0.0221934	0.0685859	0.03169	1.3645	-0.459273	-0.0106616	-0.220411	-0.00717504	-15872	0.316452	14.9285	16.5887	16.1151	14.0102	-0.604057	-0.220094	1.10915	71.7957	38.7696	32.47	11.414	0.281023	15.6305	3.38452	21.8106	14.0102	23.3797	21.2222	16.3856	14.4513	-25.131	33.4889	14.9285	15.5789	30.7058	36.493	27.18	29.9917	25.7353	31.3299
744	494	299	284	375	332	376	116	7	80	0.0743034	-0.174792	0.106035	0.587896	-0.765182	0.625293	0.415473	0.291889	853.25	0.473314	6.57314	7.21765	6.92436	7.90513	0.746187	0.855121	0.837723	8.27849	18.7156	32.13	4.877	0.420407	101.678	2.65502	19.3733	7.90513	10.0002	15.0049	13.1033	6.68688	9.48474	31.3056	6.57314	7.21125	1.84809	25.4242	23.0796	22.9627	25.0743	24.913
1917	1775	1617	1581	1495	1483	1487	1114	1008	1308	-0.0513654	-0.0977118	-0.0733396	0.999315	-0.372394	0.0545717	0.0980513	0.0214826	-2693.75	-0.418581	11.6496	11.414	11.4037	12.1078	0.461124	0.379306	0.999771	18.7035	19.5717	31.87	10.3664	-0.371727	25.6282	2.6949	25.5674	12.1078	29.2877	27.1103	26.5564	11.7373	-13.914	29.4866	11.6496	11.4344	48.2426	23.3494	18.5935	20.3517	16.0907	16.8247
1221	859	649	550	500	445	384	120	8	254	0.24359	0.107996	0.347759	0.47985	-0.860303	0.615443	0.2531	0.276074	422.75	0.703223	8.19321	7.26848	7.63461	9.506	0.632554	0.850608	0.782892	98.6748	57.947	31.81	4.93242	0.62453	115.536	3.8697	61.3022	9.506	-5.02625	92.1782	49.4712	8.65795	7.50518	43.614	8.19321	7.93701	34.1528	-8.97006	59.2375	55.3136	64.2506	34.7228
851	605	435	402	401	419	383	87	9	187	-0.104061	-0.263048	-0.148518	0.869688	-0.856198	0.307407	0.326754	0.161041	589.5	-0.529574	7.38032	7.26217	7.48292	8.45769	0.688769	0.674898	0.954526	18.1041	19.4965	31.71	4.43105	-0.470359	39.7736	2.69145	20.3681	8.45769	17.0105	18.0284	20.5879	7.57698	8.38484	36.9469	7.38032	7.3742	21.6885	15.5583	23.1886	22.5418	25.3677	19.3123
4314	4276	4461	4548	5083	5536	5744	1697	28	3926	0.0555732	0.0766573	0.0793549	0.90714	-0.603134	0.118941	-0.0280714	0.0207442	-13031	0.429726	16.5681	17.909	17.6902	16.231	-0.303917	0.491787	0.968036	54.0401	29.5886	31.4	11.9278	0.381612	12.961	3.09296	23.2632	16.231	19.112	22.8056	17.0775	16.4618	-23.532	29.9744	16.5681	17.1939	28.2702	25.8243	26.7017	26.6607	29.9825	28.9433
2187	2302	2320	2393	2264	2421	2563	362	24	1800	-0.055505	-0.0516217	-0.0792534	1.08719	-0.842745	0.0712074	0.00987059	-0.0423453	-5289	-0.429542	13.3756	13.6851	13.4276	13.2039	0.21451	0.414485	1.02826	34.8124	22.7752	31.24	7.12694	-0.381456	19.8052	2.83457	25.2693	13.2039	39.9454	27.1934	24.8154	13.2382	-17.4231	31.8271	13.3756	13.1308	52.1072	31.6738	19.7269	21.6251	17.3862	22.4732
2089	1932	1847	1823	1775	1805	1787	1161	1009	1516	-0.0533219	-0.0757238	-0.0761344	0.992169	-0.399068	0.0453401	0.0796312	0.00738949	-3444	-0.423832	12.216	12.135	12.1757	12.4548	0.430224	0.356583	0.997383	31.1765	21.8526	31.13	10.5102	-0.376388	26.9327	2.79577	25.2556	12.4548	25.8233	26.4377	26.1907	12.2694	-15.1015	30.5547	12.216	12.1078	46.4465	24.9584	19.1325	21.066	16.4419	18.0239
2468	2326	2130	2453	3312	3837	4148	1552	1011	2480	0.197287	0.154643	0.281703	1.02361	-0.33276	0.12321	-0.166009	0.139828	-11318.2	0.655537	13.4865	16.0674	15.6554	13.2496	-0.549597	0.497602	1.00781	48.7235	27.3792	30.97	11.5779	0.582147	5.53039	3.01398	23.9596	13.2496	22.9144	24.2996	15.3784	12.8665	-22.4522	31.193	13.4865	14.9061	22.1694	52.3077	22.3111	23.4233	22.6795	36.3313
1406	1376	1186	1135	1177	1243	1259	183	10	714	-0.0444738	-0.118245	-0.0634966	0.916129	-0.867006	0.206226	0.161181	0.0244705	-706.75	-0.398949	10.4311	10.798	10.752	11.1226	0.544216	0.59081	0.971223	21.0771	19.9003	30.97	5.67741	-0.354297	32.5879	2.7099	24.4164	11.1226	54.8436	26.3867	27.5568	10.5851	-8.90749	28.3759	10.4311	10.5583	34.9713	19.2481	18.9011	20.4301	17.0475	15.1206
1489	1322	1223	1194	1109	1151	1124	234	11	754	-0.104788	-0.143104	-0.149608	0.975782	-0.822995	0.135817	0.15509	0.00690215	-901.25	-0.530866	10.6088	10.3973	10.4799	10.9752	0.537272	0.514025	0.991861	40.6687	24.5059	30.88	6.16224	-0.471451	21.2909	2.90462	24.9836	10.9752	33.5414	26.5743	24.6177	10.694	-9.65936	28.2138	10.6088	10.3509	46.2328	23.8752	21.0248	22.5908	20.0038	20.1245
2538	2149	1769	1668	2246	2607	2721	224	15	1025	0.288272	0.196786	0.411617	0.593691	-0.895765	0.515022	0.0612346	0.237336	-2627.25	0.743871	11.8595	13.9608	13.763	12.9046	0.394154	0.801571	0.840466	59.1181	31.931	30.79	6.07318	0.660593	85.7348	3.17252	25.9354	12.9046	10.1746	25.936	25.3921	12.0942	-13.7986	30.6762	11.8595	13.0959	21.1531	15.9447	23.1321	25.9261	19.848	15.257
1173	976	835	1091	1524	2017	2390	965	12	1210	-0.0321384	-0.109721	-0.0458816	1.59259	-0.0112705	-0.21425	-0.121907	0.0788748	-4607.25	-0.357997	10.2946	13.37	12.6348	9.91935	-0.495842	-0.598375	1.1678	16.3031	19.2898	30.65	9.88195	-0.317937	21.76	2.6819	26.3131	9.91935	33.0486	28.2888	26.6977	9.41663	-16.6398	16.9995	10.2946	11.5079	16.5244	103.987	18.5485	20.7981	14.7576	45.3187
4244	4044	4089	4063	4578	4938	5050	988	24	3032	0.0801935	0.0856884	0.114511	0.891087	-0.755687	0.225938	-0.028235	0.0503948	-10478.5	0.485604	15.9569	17.1566	17.0288	15.932	-0.304506	0.609064	0.962292	56.8798	30.8706	30.63	9.95984	0.431234	16.2805	3.137	23.4804	15.932	20.8449	23.3529	19.1094	15.9909	-21.8826	30.7406	15.9569	16.6045	29.2834	25.8099	25.6756	26.7104	27.5349	27.034
2082	1916	2046	2194	2319	2479	2641	901	45	2263	0.0492565	0.0819358	0.0703313	1.43844	-0.529749	-0.00110595	-0.25794	0.0294118	-12115.8	0.412778	12.9941	13.8226	13.534	12.4203	-0.63656	-0.103414	1.12884	79.0332	43.3079	30.62	9.65847	0.366568	18.667	3.51174	23.5752	12.4203	25.2436	23.9913	20.7679	12.6951	-22.9677	30.9654	12.9941	13.2363	38.675	39.9465	30.2051	34.5685	24.5979	32.1726
725	499	317	321	271	278	222	53	9	48	-0.167587	-0.376552	-0.239126	0.384956	-0.893788	0.649635	0.703072	0.2	1459.5	-0.620692	6.84702	6.05505	6.52652	7.93171	0.889201	0.866077	0.727451	34.0784	22.5796	30.55	3.75629	-0.551333	42.5729	2.82643	23.0097	7.93171	20.0844	22.5498	25.541	6.81846	11.3432	37.447	6.84702	6.47127	28.4934	41.3461	27.912	25.5026	30.0842	37.0238
812	547	365	324	303	339	291	52	7	66	-0.168	-0.355638	-0.23974	0.519231	-0.904936	0.595092	0.604106	0.189789	1401.5	-0.621222	6.86829	6.62671	6.97268	8.17829	0.845352	0.841127	0.803748	4.40094	18.6411	30.5	3.73251	-0.551785	42.9004	2.6515	18.8269	8.17829	7.59293	13.5307	16.852	7.14657	11.1909	40.187	6.86829	6.71657	21.9129	6.76614	24.2319	22.4813	26.2218	14.349
1929	1912	2289	2239	2510	2837	3250	805	16	2607	-0.0698761	0.0199897	-0.0997731	1.56482	-0.578975	-0.134218	-0.239156	-0.0775568	-12474.8	-0.463808	13.0823	14.8125	14.1564	12.4116	-0.620718	-0.512	1.16097	4.84254	18.6429	30.48	9.30248	-0.411885	19.0403	2.65158	28.4385	12.4116	39.0393	31.0311	28.9381	13.179	-23.1923	31.9129	13.0823	13.5902	33.1513	23.1196	20.002	20.2963	20.5326	20.0934
2292	2050	1957	2229	3264	3803	3988	646	13	2291	0.236888	0.21486	0.338248	0.92024	-0.684878	0.161267	-0.174884	0.16528	-10569.2	0.696752	13.0628	15.8581	15.609	12.7033	-0.559221	0.544312	0.972673	78.5512	42.9913	30.24	8.64459	0.618749	31.1683	3.50316	24.2293	12.7033	18.5515	24.211	24.9281	12.5083	-21.9456	30.3222	13.0628	14.8337	20.8113	52.3331	29.2412	33.9756	21.4702	35.4411
1967	1812	1609	1597	1484	1476	1410	1088	1007	1213	-0.0543906	-0.113364	-0.0776588	0.891199	-0.399558	0.0865964	0.169787	0.028968	-1592.5	-0.426642	11.6888	11.2135	11.3858	12.1914	0.553734	0.442418	0.962332	40.2212	24.363	30.22	10.2851	-0.378885	25.0675	2.89897	24.9524	12.1914	27.4862	26.1381	25.3248	11.718	-11.6778	30.7936	11.6888	11.4063	50.3865	26.5517	20.1062	22.0181	17.8998	20.0425
1292	1241	1050	1042	800	819	734	133	8	421	-0.162791	-0.242864	-0.23241	0.806878	-0.892828	0.284622	0.340897	-0.0125362	1177.25	-0.614825	10.1381	9.02053	9.3561	10.7463	0.698566	0.657793	0.930971	59.8185	32.272	30.13	5.10447	-0.546022	25.6916	3.18377	33.9806	10.7463	56.5569	35.4613	35.7883	10.164	10.559	60.8868	10.1381	9.28318	65.1359	28.5539	28.29	28.0319	32.2131	32.1793
779	614	375	374	324	377	356	74	9	117	-0.18859	-0.411494	-0.269123	0.753906	-0.879479	0.372654	0.521685	0.159664	1298.25	-0.64563	7.20483	7.08734	7.22405	8.49942	0.805013	0.719618	0.910135	8.56359	18.7262	30.13	4.19834	-0.573464	34.1688	2.65552	18.9916	8.49942	46.4566	20.425	21.729	7.21125	10.909	40.0416	7.20483	6.86829	29.9326	36.3234	23.9047	22.0573	25.6951	31.2138
832	680	465	455	375	380	356	78	7	168	-0.181703	-0.357285	-0.25933	0.742236	-0.885294	0.314286	0.479869	0.107486	1221.5	-0.637702	7.69137	7.08734	7.24316	8.79366	0.782903	0.679895	0.905414	17.453	19.4185	30.07	4.27266	-0.566396	33.7942	2.68785	19.7493	8.79366	50.2893	21.5715	22.8204	7.74731	10.6897	44.2589	7.69137	7.21125	37.9957	29.8985	23.5182	22.0281	25.5112	27.7189
2340	1850	1648	1754	2001	1995	2183	503	17	2014	0.208833	0.15293	0.298183	1.14575	-0.728108	0.111209	-0.218585	0.191562	-10308	0.668079	12.0599	12.9723	12.5887	12.276	-0.602384	0.480891	1.0464	49.2733	27.5962	30.04	7.95285	0.59329	41.9401	3.02192	24.0043	12.276	1.17703	21.2194	24.1373	11.8119	-21.7633	28.3104	12.0599	12.6013	30.8952	41.3039	21.1315	23.6145	17.856	27.7461
1126	951	880	875	817	841	821	162	16	533	-0.0738255	-0.112281	-0.105395	0.930171	-0.829653	0.174923	0.147858	0.0342936	-675.5	-0.472361	9.56466	9.3637	9.43913	9.83392	0.528788	0.559262	0.97616	43.3543	25.4005	30.01	5.45136	-0.419503	30.8376	2.93955	25.2091	9.83392	38.5461	27.078	27.8843	9.58284	-8.77422	22.9385	9.56466	9.34847	40.5308	30.0567	22.9974	24.3066	23.3108	26.1151
775	541	342	331	315	324	264	56	16	100	-0.14958	-0.36272	-0.213446	0.525692	-0.896488	0.433428	0.605341	0.200935	1293.75	-0.597626	6.9174	6.41507	6.86829	8.14828	0.845928	0.756785	0.807068	34.3621	22.6547	29.93	3.82586	-0.530833	43.4187	2.82956	23.1271	8.14828	18.8577	22.5643	25.6801	6.99319	10.8964	37.9503	6.9174	6.80409	21.2047	29.1922	26.9663	25.1313	29.6937	30.5669
1170	1068	843	893	674	737	592	113	11	228	-0.15956	-0.272186	-0.227784	0.518822	-0.894195	0.456496	0.542238	0.0274012	2224.25	-0.610719	9.6298	8.39667	9.0328	10.2217	0.815449	0.769979	0.803537	92.8671	53.2649	29.9	4.83459	-0.542385	28.8625	3.76253	61.503	10.2217	52.5232	64.9969	69.3584	9.44661	13.0535	63.4376	9.6298	8.76772	63.1137	46.7691	50.3942	48.2361	59.147	62.1261
5033	4779	5031	4979	5242	5564	5796	1527	24	4537	0.0837734	0.109226	0.119624	1.01344	-0.680477	0.134821	-0.115819	0.0438088	-18972.5	0.492726	17.0758	17.9629	17.7199	16.844	-0.487446	0.512766	1.00446	43.8748	25.5812	29.9	11.5154	0.437558	10.5616	2.9465	24.245	16.844	26.9209	25.1019	18.7315	17.135	-26.6711	29.2057	17.0758	17.3713	33.5113	26.9622	27.0597	26.8281	30.5385	30.0068
721	533	368	373	303	305	268	91	8	123	-0.202614	-0.371943	-0.289131	0.819672	-0.829268	0.3297	0.454297	0.134627	932.75	-0.661249	7.1984	6.44731	6.73132	8.10791	0.768741	0.690833	0.935865	31.3829	21.9019	29.9	4.49794	-0.587341	29.1986	2.79787	22.4401	8.10791	37.0002	23.5747	23.7333	7.1661	9.77061	36.6632	7.1984	6.71657	34.5791	40.6682	26.6166	24.6697	29.1041	35.9522
2365	2399	2650	2598	2795	2998	3238	882	16	2933	0.0223206	0.0719536	0.0318713	1.40599	-0.632347	-0.0284011	-0.237808	-0.0157148	-14746.5	0.317054	13.7472	14.7942	14.4193	13.3868	-0.619549	-0.305102	1.12028	52.1696	28.7829	29.84	9.59009	0.281559	19.295	3.06463	23.2525	13.3868	32.1103	24.2052	21.244	13.8383	-24.5224	33.0756	13.7472	14.0862	37.0829	23.6272	21.9664	24.1208	19.9769	19.9606
2411	2280	2183	2117	1987	2050	1982	1143	1009	1643	-0.0507822	-0.0724365	-0.0725095	0.956897	-0.498684	0.0910097	0.0943125	0.00194308	-3439.25	-0.416996	12.8403	12.5613	12.7033	13.1617	0.455187	0.44981	0.985421	38.4861	23.8256	29.62	10.4556	-0.370314	26.3557	2.87749	24.985	13.1617	23.9513	25.895	25.4364	12.9723	-15.0946	32.1362	12.8403	12.5719	52.2397	21.6382	19.7443	21.9437	16.6346	16.2345
877	671	498	431	315	321	263	72	7	121	-0.263959	-0.396462	-0.376729	0.572414	-0.892697	0.411192	0.603345	0.0790569	1614.75	-0.722232	7.55369	6.40696	6.84702	8.75469	0.844997	0.743615	0.830303	16.1232	19.2707	29.37	4.16017	-0.641474	28.6994	2.68101	19.3431	8.75469	31.8748	19.0248	18.7385	7.92641	11.7319	48.5631	7.55369	6.80409	46.5931	-2.11307	24.4281	22.0005	25.5942	7.73584
714	506	350	319	260	260	228	62	7	79	-0.215278	-0.382514	-0.307188	0.584071	-0.87747	0.481967	0.586207	0.146341	1222.25	-0.674738	6.83277	6.10911	6.3825	7.96863	0.836919	0.784042	0.835902	3.17102	18.6452	29.36	3.95789	-0.599331	35.1406	2.65169	18.9704	7.96863	27.9042	17.8971	19.3825	7.0473	10.6919	37.9274	6.83277	6.3825	30.793	13.756	25.1216	22.8165	26.6763	19.2167
3425	3596	3893	3765	4261	4641	4833	796	13	3725	0.0301445	0.0697193	0.043044	1.08029	-0.778643	0.0521628	-0.108024	-0.014727	-14761.5	0.350459	15.5568	16.9072	16.6803	15.3205	-0.476256	0.37364	1.02608	41.8319	24.8855	29.13	9.26768	0.311221	21.4504	2.91955	24.6738	15.3205	19.938	25.0438	22.9531	15.7312	-24.5307	31.9918	15.5568	16.212	29.8552	24.7411	24.2291	24.1318	26.6343	25.7339
1326	1171	1087	1044	1014	1107	1101	252	57	759	-0.0880881	-0.12488	-0.125763	1.0483	-0.784799	0.091018	0.101599	0.0142825	-1451	-0.501015	10.1446	10.3259	10.3447	10.5403	0.46662	0.449824	1.01585	28.8856	21.331	29.11	6.31636	-0.444944	21.6283	2.77335	24.8295	10.5403	38.545	26.6135	24.7734	10.282	-11.3211	24.7941	10.1446	10.0465	39.7368	20.3777	19.8067	21.2664	18.4856	16.9045
953	929	635	767	580	616	502	76	8	110	-0.157703	-0.33573	-0.225112	0.409091	-0.918192	0.615385	0.661896	0.0540037	2542	-0.608321	9.15374	7.94757	8.50864	9.7575	0.871492	0.850581	0.742346	101.763	60.5576	29.07	4.23582	-0.540273	36.5485	3.92696	71.4556	9.7575	79.9936	54.3049	57.5944	8.59524	13.6477	59.2282	9.15374	8.33955	58.8476	84.9686	60.27	57.2151	68.8194	81.5814
734	537	382	330	313	337	291	51	8	125	-0.150602	-0.311355	-0.214922	0.762411	-0.905028	0.385749	0.428191	0.141573	873.75	-0.599	6.91042	6.62671	6.95894	8.12814	0.753725	0.72795	0.913545	11.8463	18.9009	29.05	3.70843	-0.53204	45.1622	2.66375	19.5268	8.12814	33.3671	19.479	22.957	7.25584	9.5601	36.9628	6.91042	6.78966	21.3601	-0.419915	24.2169	22.7065	26.4151	9.5892
840	599	383	378	419	469	390	51	10	113	-0.0065703	-0.226203	-0.00937712	0.52381	-0.914858	0.539715	0.503137	0.227823	1198.75	-0.210874	7.23043	7.30614	7.76946	8.42964	0.795357	0.814182	0.806104	57.2333	31.0351	28.87	3.70843	-0.187296	78.0643	3.14257	32.5628	8.42964	18.5328	37.0506	35.7832	7.26217	10.6229	39.7595	7.23043	7.48292	14.3182	33.4554	32.3117	31.4377	37.5182	38.8909
999	833	659	644	503	555	464	111	8	278	-0.178891	-0.289474	-0.255358	0.908497	-0.866747	0.24559	0.3328	0.0504323	784.75	-0.63443	8.63566	7.74175	8.21797	9.40911	0.692991	0.626235	0.968518	62.8063	33.7747	28.78	4.8059	-0.56346	27.5599	3.23244	35.2255	9.40911	42.9631	38.8567	39.9409	8.70219	9.22381	48.1141	8.63566	7.95285	51.0373	27.3058	33.3841	31.639	38.136	36.1407
1501	1299	1216	1266	1390	1496	1512	262	9	1033	0.0928758	0.0600579	0.132605	1.09898	-0.798306	0.172938	-0.10691	0.0989255	-4451	0.509942	10.8179	11.4776	11.437	10.9111	-0.474612	0.557139	1.03196	71.7274	38.729	28.52	6.39883	0.452864	66.831	3.38334	26.6216	10.9111	28.3264	28.5102	31.2727	10.6736	-16.4495	24.0974	10.8179	11.1602	31.4299	39.2958	29.5953	33.0163	27.3316	33.9366
817	591	398	370	291	306	256	75	9	103	-0.224615	-0.402135	-0.32054	0.68254	-0.873096	0.419718	0.549148	0.146381	1329.75	-0.684375	7.17905	6.3496	6.73866	8.39194	0.818898	0.74872	0.880459	22.0784	20.0537	28.5	4.21716	-0.607873	30.923	2.71685	20.3361	8.39194	23.6049	19.1185	19.502	7.35576	10.9966	41.6033	7.17905	6.62671	36.8289	17.751	25.4562	22.9699	26.8131	21.7813
912	745	569	554	435	466	398	97	14	186	-0.194124	-0.319752	-0.277084	0.742188	-0.869799	0.347368	0.446602	0.0649137	1232.5	-0.651935	8.21303	7.35576	7.75286	9.06537	0.764376	0.702959	0.905395	44.9554	25.964	28.48	4.5947	-0.579019	28.7347	2.96113	26.7868	9.06537	44.1516	29.005	29.4432	8.28649	10.7217	48.789	8.21303	7.57698	46.7937	27.2629	27.4735	25.8924	30.6252	30.2396
1033	828	652	599	759	726	678	178	7	269	0.191569	0.0743432	0.273487	0.55359	-0.785024	0.562602	0.217647	0.209218	204	0.649101	8.42964	8.78503	8.98764	9.39024	0.601521	0.825532	0.8211	89.8872	50.9778	28.34	5.62523	0.576467	92.5109	3.70789	51.9689	9.39024	32.2621	62.85	48.5419	8.67127	5.88677	40.0139	8.42964	9.1218	13.7312	11.399	46.603	48.3924	55.8826	41.2455
1309	1231	1178	1111	1077	1178	1196	190	9	837	-0.0882217	-0.110009	-0.125956	1.06586	-0.845654	0.0822368	0.0784056	-0.0128977	-1832.5	-0.501271	10.3571	10.6148	10.5612	10.7173	0.428005	0.434866	1.02149	21.8287	20.0146	28.27	5.7489	-0.445169	26.2025	2.71508	25.108	10.7173	51.6461	27.1103	26.7196	10.5612	-12.2372	25.5793	10.3571	10.2503	40.8447	15.8052	19.1284	20.6097	17.4732	13.3347
1394	1229	1053	1109	1660	1993	2214	278	22	833	0.202575	0.127441	0.28923	0.799748	-0.7738	0.311855	-0.0164066	0.17217	-2851.75	0.661324	10.3509	13.0334	12.5845	10.7115	-0.254101	0.678137	0.92822	28.085	21.1597	28.2	6.52652	0.587302	70.6943	2.7659	25.2625	10.7115	35.5518	27.0305	29.5361	10.1736	-14.1809	22.4459	10.3509	11.8405	14.996	43.3918	18.9396	21.086	15.6097	27.0697
1805	1651	1712	1634	1609	1709	1708	346	19	1261	-0.0736908	-0.0556266	-0.105216	1.04198	-0.79043	0.0788897	0.0351097	-0.0211751	-3389	-0.472093	11.7783	11.9535	11.9559	11.819	0.327448	0.428884	1.0138	33.233	22.3602	28.16	7.02035	-0.419248	18.7921	2.81725	25.1595	11.819	29.8815	26.5911	23.7755	11.9628	-15.0207	29.6986	11.7783	11.718	44.1288	18.3178	19.2691	21.2148	16.6084	14.2182
2247	2141	2311	2523	2675	2925	3170	1222	21	2935	0.0713281	0.109216	0.101848	1.46924	-0.429239	-0.0480271	-0.293166	0.0305191	-15841.8	0.467	13.6136	14.6899	14.3013	12.8886	-0.664311	-0.363493	1.13684	85.5621	47.7972	28.15	10.6911	0.414719	12.8029	3.62912	22.6949	12.8886	27.1467	22.9555	17.184	13.2211	-25.1151	32.6676	13.6136	13.8817	38.6054	41.0613	32.8729	37.6762	26.7135	34.3174
814	613	405	393	442	503	397	84	8	118	-0.0574413	-0.258727	-0.0819803	0.623269	-0.862969	0.507307	0.463007	0.183879	1137.25	-0.434413	7.32483	7.3496	7.95285	8.49481	0.773623	0.797548	0.854198	58.732	31.745	28.1	4.37952	-0.385841	47.6366	3.16635	33.3307	8.49481	33.0756	37.5364	40.5328	7.39864	10.438	40.5236	7.32483	7.61741	14.1059	28.6694	32.5438	31.9225	37.9252	36.7096
957	735	564	550	498	504	456	98	7	204	-0.128	-0.255337	-0.182706	0.694954	-0.866667	0.3625	0.416185	0.105117	1058	-0.567437	8.19321	7.697	7.95811	9.02462	0.746613	0.713022	0.885765	33.4871	22.4255	27.87	4.61044	-0.503968	34.5951	2.81999	22.9402	9.02462	27.3231	23.3171	24.8113	8.26215	10.1897	47.2092	8.19321	7.92641	34.4728	27.7337	23.8657	23.4858	26.2446	27.1041
995	857	586	577	589	659	599	90	9	191	-0.0335097	-0.219929	-0.0478338	0.589416	-0.894982	0.483085	0.452542	0.136648	1473.75	-0.363004	8.32515	8.42964	8.70219	9.49861	0.76775	0.784647	0.838444	36.5145	23.2471	27.86	4.4814	-0.322396	51.2976	2.85402	23.7504	9.49861	50.3135	25.7109	29.4152	8.36821	11.38	51.18	8.32515	8.38247	26.2548	30.0232	23.4287	23.3462	25.5333	27.8031
823	638	483	528	589	549	562	418	14	257	0.0482759	-0.0905983	0.0689089	0.93797	-0.344828	0.348542	0.122252	0.1676	-283.75	0.409976	8.08248	8.25237	8.18824	8.60875	0.496308	0.70375	0.97888	41.0429	24.6267	27.83	7.47697	0.364119	43.1198	2.90939	25.0505	8.60875	38.9794	26.8991	29.8776	7.84601	-6.57121	12.5164	8.08248	8.38247	19.0204	59.2421	24.395	25.7154	25.27	41.0371
772	639	396	422	290	296	207	50	4	35	-0.277419	-0.480881	-0.395882	0.254464	-0.921753	0.72973	0.836207	0.114094	2175.75	-0.734269	7.50074	5.91548	6.66444	8.61325	0.942116	0.9003	0.633688	64.4045	34.6108	27.77	3.68403	-0.652197	34.0387	3.25889	37.7066	8.61325	58.2665	38.6657	40.7717	7.34342	12.958	46.8615	7.50074	6.61911	51.2938	53.4963	39.1176	34.2832	36.5601	47.2845
719	509	331	316	301	333	278	79	8	62	-0.0816993	-0.288608	-0.116585	0.405694	-0.844794	0.638484	0.634029	0.203369	1339.25	-0.488519	6.81128	6.52652	6.9313	7.98434	0.859085	0.861093	0.740286	23.0899	20.2177	27.73	4.29084	-0.433917	44.9234	2.72423	20.5028	7.98434	27.1754	19.9039	23.3289	6.9174	11.0227	37.5552	6.81128	6.70176	20.2912	25.9371	25.3696	23.7554	27.8399	27.3417
756	537	354	336	279	274	233	58	7	102	-0.206133	-0.394805	-0.294143	0.746781	-0.891993	0.391045	0.510549	0.165586	1113.25	-0.665048	6.95205	6.15345	6.49507	8.12814	0.799243	0.731266	0.907259	23.4735	20.2823	27.6	3.87088	-0.590721	37.1661	2.72713	20.698	8.12814	24.5361	19.7855	21.7816	7.07404	10.3641	37.3244	6.95205	6.53434	30.6393	23.9499	25.8854	23.5454	27.603	26.0361
797	620	413	426	291	283	213	50	24	115	-0.294671	-0.467456	-0.420508	0.488889	-0.919355	0.323529	0.69863	0.106061	1667.5	-0.749189	7.52437	5.97209	6.56541	8.52702	0.887324	0.686496	0.787777	62.4743	33.6038	27.42	3.68403	-0.665445	32.7689	3.22698	36.0243	8.52702	41.9106	39.9517	41.9757	7.44703	11.8583	44.7481	7.52437	6.62671	52.0926	44.5674	38.0169	33.5585	36.7989	43.6646
1313	1134	1024	931	863	925	865	136	9	524	-0.0998926	-0.150101	-0.142614	0.854415	-0.880071	0.230543	0.225946	0.0245296	21.5	-0.522461	9.7645	9.52808	9.74348	10.4281	0.609071	0.613175	0.948906	30.7531	21.7527	27.41	5.14256	-0.463993	31.1915	2.7915	23.1274	10.4281	34.625	24.2506	24.9758	10.0794	2.78065	42.6625	9.7645	9.52073	42.294	7.21971	20.6019	21.5464	20.5407	10.1814
888	840	557	594	403	425	351	70	9	123	-0.229581	-0.412952	-0.327686	0.573066	-0.916667	0.478814	0.615385	0.0523182	2134.5	-0.689423	8.40612	7.054	7.51847	9.43539	0.850581	0.782328	0.830618	62.5126	33.6235	27.22	4.12129	-0.61232	31.7685	3.22761	36.4316	9.43539	78.4692	32.5063	33.8598	8.22783	12.8755	54.1883	8.40612	7.38644	62.8196	51.6214	35.1672	31.4502	35.9764	46.0759
1808	1734	1782	1604	1593	1798	1816	372	76	1312	-0.0264977	-0.0128505	-0.037834	1.04142	-0.785467	0.125916	-0.00744133	-0.00934579	-4134.5	-0.335707	11.7058	12.2003	12.1599	12.0139	-0.195232	0.501218	1.01362	9.55415	18.769	27.2	7.19197	-0.298128	22.6623	2.65754	26.3865	12.0139	37.3638	28.5	27.2158	12.1237	-16.05	29.7907	11.7058	11.679	43.0311	6.8757	18.5073	20.157	16.2178	6.57732
1966	1802	1609	1585	1497	1483	1423	1099	1008	1219	-0.0568144	-0.113033	-0.0811196	0.909471	-0.390122	0.0817326	0.159588	0.0277946	-1727.25	-0.432888	11.6594	11.2478	11.4037	12.1689	0.542417	0.433975	0.968864	35.9621	23.0912	27.15	10.3197	-0.384432	25.4238	2.84762	24.8886	12.1689	26.7505	25.9915	25.2698	11.718	-11.9983	30.5705	11.6594	11.4395	48.4094	24.9482	19.5847	21.481	17.186	18.5855
1870	1729	1546	1542	1405	1428	1378	1136	1054	1206	-0.0614487	-0.116925	-0.0877358	0.945867	-0.342973	0.0625729	0.144275	0.0229104	-1914.25	-0.44435	11.553	11.128	11.261	12.0023	0.524482	0.397004	0.98162	36.2793	23.1804	27.14	10.4342	-0.394613	26.5556	2.85128	24.9125	12.0023	30.0993	26.2704	25.9027	11.563	-12.4165	29.7465	11.553	11.2002	52.2318	27.7772	19.7218	21.5276	17.6012	20.5028
1164	1030	928	989	1352	1567	1616	308	17	731	0.243684	0.194053	0.34792	0.819135	-0.700971	0.352237	-0.0964912	0.183458	-3271.75	0.703331	9.9632	11.7349	11.6151	10.099	-0.458665	0.706228	0.935661	59.788	32.257	27.02	6.75331	0.62461	67.231	3.18328	25.6745	10.099	46.405	27.7441	30.59	9.754	-14.8455	19.7402	9.9632	11.0575	16.273	47.5361	24.9391	29.0263	17.7891	30.6104
4235	3927	3869	3790	4087	4385	4502	1444	1010	1637	0.00807589	0.000636213	0.0115317	0.612411	-0.632289	0.412103	0.239779	0.0269727	591.25	0.225925	15.5912	16.5121	16.3678	15.7769	0.621256	0.744164	0.849208	41.5715	24.7995	26.91	11.3029	0.20063	17.8879	2.91618	25.4368	15.7769	21.7602	26.365	23.1895	15.6988	8.39313	65.6108	15.5912	15.9883	34.7465	25.1367	23.7564	24.7849	24.8477	24.5754
803	620	433	427	407	434	397	83	8	154	-0.0811486	-0.255061	-0.115818	0.660326	-0.866129	0.409962	0.436848	0.14973	992.5	-0.487445	7.53025	7.3496	7.57117	8.52702	0.75877	0.742873	0.870802	27.1707	20.9708	26.91	4.36207	-0.432939	43.9257	2.75765	21.4656	8.52702	39.6925	22.6131	25.7989	7.56535	9.97494	40.8168	7.53025	7.4108	25.8148	32.4171	24.0734	23.3227	26.5543	29.8612
686	461	289	278	210	210	169	41	6	33	-0.273128	-0.472843	-0.389659	0.309091	-0.911063	0.666667	0.800781	0.191043	1508	-0.730401	6.52652	5.52877	5.94392	7.72503	0.92862	0.87358	0.676128	6.81517	18.6719	26.74	3.44822	-0.648817	37.8269	2.65295	18.7816	7.72503	18.3725	15.8537	17.9878	6.61149	11.4675	35.7234	6.52652	5.94392	32.8687	28.8708	26.402	23.2461	26.6601	28.0471
826	748	448	441	274	264	199	55	7	51	-0.337313	-0.542268	-0.481376	0.342342	-0.926471	0.626374	0.815534	0.0781893	2492.25	-0.783721	7.61166	5.83827	6.41507	9.07752	0.934288	0.855614	0.699552	35.3752	22.9284	26.73	3.80295	-0.69611	28.2612	2.84091	23.2556	9.07752	73.8948	24.754	24.7385	7.65172	13.558	51.3215	7.61166	6.49507	61.7365	31.7185	28.1334	23.7337	25.1529	28.4169
802	692	411	688	1866	2292	2472	494	8	392	0.637885	0.457468	0.910729	0.519096	-0.286127	0.65171	-0.164756	0.527993	-2634.75	0.969311	8.82801	13.5212	13.1847	8.84509	-0.54821	0.866998	0.803679	85.1082	47.473	26.61	7.90513	0.860824	49.754	3.62089	31.9624	8.84509	65.073	32.252	35.4925	7.43499	-13.8117	2.86286	8.82801	12.3113	29.464	183.937	34.6402	46.4831	-24.671	16.3337
783	586	413	416	348	361	324	76	7	182	-0.18	-0.342497	-0.256883	0.891986	-0.870307	0.223881	0.391924	0.128692	747.75	-0.63569	7.46502	6.86829	7.12037	8.36821	0.731814	0.60721	0.962615	37.184	23.4397	26.6	4.23582	-0.564622	34.4369	2.86188	24.058	8.36821	34.2232	25.4168	26.9482	7.44703	9.07651	37.4912	7.46502	7.03385	34.8157	38.2918	26.9365	25.2861	29.8551	35.3768
1065	843	707	661	594	635	625	139	45	389	-0.106416	-0.192362	-0.151912	0.971979	-0.835113	0.189583	0.206009	0.0727869	-60.5	-0.533577	8.71098	8.54988	8.59524	9.44661	0.590602	0.574469	0.990571	16.4792	19.3087	26.48	5.1801	-0.473881	30.0644	2.68278	23.2034	9.44661	27.7354	23.7264	24.1291	8.90854	-3.92571	24.1152	8.71098	8.40612	38.73	15.455	21.0377	21.2202	22.0669	16.6749
742	534	364	352	358	376	365	80	8	129	-0.0520231	-0.238979	-0.0742431	0.679878	-0.850187	0.435449	0.410832	0.190211	807.25	-0.420293	7.0607	7.14657	7.21765	8.11298	0.743398	0.757959	0.879313	7.20194	18.6816	26.46	4.30887	-0.373306	49.8311	2.65341	19.3898	8.11298	28.8267	18.6217	22.7432	7.14004	9.31114	35.2568	7.0607	7.10059	18.1831	28.532	23.3154	22.6055	25.5385	26.9976
5453	5569	5490	4974	4952	5069	5260	2764	1036	3838	0.0546707	0.0475457	0.0780669	0.79298	-0.503681	0.229549	0.0682908	0.0265094	-9237.75	0.427388	17.0701	17.3912	17.1781	17.7253	0.408747	0.612292	0.925594	21.1403	19.9097	26.39	14.0339	0.379535	26.4965	2.71033	26.9833	17.7253	19.8748	28.5362	28.3595	17.641	-20.9824	25.3109	17.0701	17.0449	41.5929	35.9708	27.3886	29.3737	28.2072	32.9587
948	856	724	676	481	508	392	70	16	123	-0.302158	-0.376206	-0.431316	0.425258	-0.918224	0.518591	0.676787	-0.0402299	2328.75	-0.755553	8.77638	7.31861	7.97911	9.49492	0.877979	0.803418	0.751999	56.1665	30.5419	26.37	4.12129	-0.671034	26.5655	3.12583	32.6782	9.49492	63.7863	33.0658	33.3459	8.97938	13.2548	60.8847	8.77638	7.83517	61.7881	14.9955	30.73	28.7145	34.329	26.0233
1134	1049	807	789	689	709	664	133	12	422	-0.106996	-0.234118	-0.152745	0.852535	-0.873213	0.21342	0.30798	0.0503089	652.75	-0.534551	9.24043	8.72414	8.91693	10.1607	0.675317	0.597602	0.948209	38.7628	23.9095	26.28	5.10447	-0.47474	30.8499	2.88087	24.5437	10.1607	57.2241	26.4681	27.2395	9.31018	8.67459	50.9822	9.24043	8.83228	44.8799	26.2332	22.9668	22.9673	24.8533	25.197
763	621	491	571	594	655	676	126	10	201	0.160684	0.0446154	0.229373	0.506627	-0.797101	0.543182	0.287047	0.189769	385.5	0.612135	8.29619	8.77638	8.68455	8.5316	0.659656	0.815922	0.797192	109.686	67.6392	26.17	5.0133	0.543656	107.131	4.07442	71.9388	8.5316	55.2267	74.3152	45.9753	7.88909	7.27793	36.9985	8.29619	8.40612	24.7605	76.1542	67.9393	69.6834	85.6852	92.9602
2137	2075	2160	2092	2090	2157	2175	469	14	1635	-0.0487983	-0.0287556	-0.0696767	1.03522	-0.773976	0.0901503	0.011455	-0.026616	-4798	-0.411493	12.7895	12.9565	12.9206	12.7548	0.225423	0.44839	1.01161	34.0223	22.5649	26.13	7.76946	-0.365428	18.0681	2.82582	25.2779	12.7548	31.4785	26.8473	23.8081	12.9266	-16.8663	31.449	12.7895	12.7854	44.562	21.4015	19.4974	21.3759	17.1037	16.4534
730	582	369	366	278	288	223	49	9	74	-0.23	-0.431734	-0.328206	0.528139	-0.915808	0.514754	0.653409	0.131254	1578.75	-0.689788	7.15309	6.06413	6.60385	8.34913	0.867751	0.801432	0.808319	44.2286	25.7054	26.13	3.65931	-0.612693	38.1923	2.95126	26.5542	8.34913	53.5605	28.5166	30.8206	7.17258	11.6441	41.6497	7.15309	6.52652	39.2353	34.9999	30.5039	27.0618	31.0452	34.6512
2899	3582	3912	3777	4437	4699	4670	786	11	2519	0.0170854	0.0610747	0.0243967	0.883893	-0.78057	0.232831	0.000558659	-0.0593731	-7923.25	0.29003	15.5734	16.715	16.7495	15.3006	0.0823599	0.615196	0.959695	79.5138	43.6255	26	9.22871	0.257558	21.5207	3.5203	25.7822	15.3006	29.7029	27.4276	25.6527	15.7567	-19.9358	31.0484	15.5734	16.4322	26.6294	24.7402	30.2709	33.1214	30.1484	28.4649
1427	1413	1302	1304	1166	1245	1283	281	11	908	-0.149669	-0.189394	-0.213687	1.22741	-0.801132	0.029396	0.0890173	-0.0428514	-1813.75	-0.59785	10.9251	10.8661	10.7578	11.2214	0.446504	0.308624	1.07069	32.5918	22.1979	25.95	6.54991	-0.530938	15.95	2.81042	24.9073	11.2214	56.062	26.8367	23.0068	10.9195	-12.1953	27.2897	10.9251	10.5253	51.8207	29.589	19.7549	21.3025	18.2284	21.9816
735	482	306	292	283	285	270	61	6	98	-0.104693	-0.320548	-0.149386	0.620968	-0.873444	0.433526	0.515723	0.232602	980.5	-0.530604	6.63429	6.4633	6.58084	7.84059	0.801935	0.756842	0.853145	0.545469	18.6983	25.89	3.9365	-0.471309	47.1751	2.6542	19.2329	7.84059	7.94321	14.2999	18.3698	6.73866	9.93457	32.9648	6.63429	6.56541	17.8001	26.4158	24.6641	23.0617	26.926	26.9008
1882	1874	1746	1625	1563	1622	1623	264	9	1106	-0.0636613	-0.098798	-0.0908965	0.952505	-0.859125	0.163072	0.122828	-0.0105629	-1785.75	-0.449623	11.7567	11.7518	11.7494	12.3289	0.497087	0.546336	0.983911	23.1317	20.2247	25.79	6.41507	-0.399293	23.2778	2.72455	25.0568	12.3289	40.9754	26.9679	25.6969	12.0415	-12.1322	31.519	11.7567	11.6052	46.6456	13.3094	18.7234	20.5712	16.0631	10.6729
982	786	571	566	491	580	533	101	10	330	0.0239316	-0.135018	0.0341619	1.07513	-0.871501	0.289559	0.0993007	0.161219	-489.25	0.324474	8.2719	8.10791	8.33955	9.22871	0.463074	0.661575	1.02444	71.0798	38.3458	25.69	4.65701	0.288176	97.1822	3.37214	31.1504	9.22871	34.9808	34.5709	26.8934	8.29619	-7.87971	14.7682	8.2719	7.88909	38.5743	31.9495	38.1244	36.2488	44.0652	43.2664
953	759	624	595	606	615	545	125	9	280	0.00873709	-0.0889527	0.0124723	0.943307	-0.83531	0.387978	0.11782	0.119887	-288.75	0.231908	8.41083	8.16831	8.50403	9.1218	0.490238	0.72935	0.980734	70.3244	37.9034	25.66	5	0.205963	82.4912	3.35912	31.5672	9.1218	35.7103	35.0694	32.9464	8.54532	-6.60958	18.0758	8.41083	8.46235	26.9193	21.2405	35.7076	36.0993	42.0843	35.8904
766	571	376	362	257	264	216	59	6	72	-0.27027	-0.45108	-0.385667	0.481481	-0.896673	0.5	0.691852	0.132641	1616	-0.727899	7.12694	6	6.41507	8.29619	0.884445	0.793701	0.783778	22.5608	20.1308	25.62	3.893	-0.646546	31.6906	2.72032	20.2683	8.29619	34.7822	20.6163	21.2858	7.21765	11.7349	42.3162	7.12694	6.35786	44.2589	27.1601	26.2797	23.1697	26.6128	27.0717
1750	1585	1395	1390	1268	1258	1199	1082	1009	1104	-0.0604333	-0.123715	-0.0862847	0.944175	-0.31735	0.0564103	0.15189	0.0339335	-1673	-0.441887	11.1602	10.6236	10.7951	11.6594	0.533551	0.383518	0.981034	38.6463	23.8741	25.59	10.2662	-0.392427	25.0917	2.87945	24.9167	11.6594	29.5844	26.241	25.4451	11.1736	-11.8713	28.6015	11.1602	10.8236	50.5602	28.0456	20.2625	21.9108	18.7363	21.5168
902	762	545	559	467	478	421	130	47	197	-0.126033	-0.286076	-0.179896	0.676123	-0.829396	0.364516	0.454198	0.0973085	1256.5	-0.564513	8.23766	7.49481	7.81885	9.1338	0.768685	0.714341	0.877691	46.2469	26.435	25.52	5.0658	-0.501374	29.3473	2.97893	27.3228	9.1338	52.377	29.3396	29.951	8.16831	10.7908	48.029	8.23766	7.7584	41.5193	41.3102	27.3607	26.1271	30.7548	37.52
2986	2765	2675	2552	3005	3226	3192	394	9	1746	0.111	0.09463	0.158497	0.853724	-0.857505	0.313814	-0.0158391	0.0838257	-5993.25	0.541178	13.6655	14.7238	14.7759	14.0356	-0.251137	0.679554	0.94865	64.4398	34.6295	25.4	7.33104	0.48059	49.5838	3.25948	24.874	14.0356	17.9422	25.1328	28.7801	13.8817	-18.1644	32.3472	13.6655	14.4305	29.1335	20.0603	24.5788	27.378	21.9571	19.3919
884	637	460	430	484	563	537	97	7	212	0.047619	-0.114611	0.0679699	0.650198	-0.847724	0.409471	0.318841	0.203463	522.5	0.408105	7.54784	8.12814	8.25726	8.60425	0.683163	0.742576	0.866327	41.6972	24.841	25.19	4.5947	0.36246	104.797	2.9178	25.4704	8.60425	17.7241	26.0315	18.1416	7.71944	8.05432	37.3914	7.54784	7.85142	15.4229	18.0963	25.8286	25.885	28.7393	23.4967
951	760	609	608	501	526	476	104	12	284	-0.13197	-0.238794	-0.188379	0.888651	-0.863158	0.243675	0.293617	0.0758725	482.25	-0.57325	8.47165	7.80793	8.07226	9.12581	0.664651	0.624602	0.961414	47.7618	27.0062	25.13	4.70267	-0.509126	33.0186	3.00023	27.6225	9.12581	36.6034	30.0386	31.4878	8.47629	7.84195	43.0442	8.47165	7.94229	44.6411	33.4186	27.3331	26.5775	30.922	33.7475
721	457	274	249	260	266	232	47	5	62	-0.0916335	-0.334307	-0.130741	0.425439	-0.897155	0.572414	0.649819	0.267869	1212.5	-0.507541	6.29119	6.14463	6.43123	7.70262	0.866159	0.830303	0.752106	1.2328	18.6786	25.12	3.60883	-0.450835	54.6642	2.65327	19.0116	7.70262	1.35936	12.2925	17.5291	6.49507	10.6634	32.4024	6.29119	6.3825	10.8893	15.1648	25.1449	23.2897	27.3015	20.5834
953	695	533	512	454	460	438	169	69	243	-0.11623	-0.244405	-0.165903	0.841232	-0.756835	0.269173	0.32381	0.126587	586.25	-0.549479	8	7.59436	7.71944	8.85785	0.686694	0.64567	0.944	15.6101	19.2178	25.09	5.52877	-0.488023	25.5315	2.67856	20.1231	8.85785	15.9087	17.44	15.9913	8.10791	8.3694	41.4079	8	7.68573	34.6999	24.1618	22.3414	21.8393	24.2075	23.5262
1191	1034	942	850	729	777	736	147	9	473	-0.100467	-0.146341	-0.143431	0.82987	-0.857834	0.238938	0.236103	0.020026	86.75	-0.523458	9.47268	9.02871	9.19335	10.1121	0.618064	0.620529	0.939731	22.5538	20.1297	24.99	5.27763	-0.464881	29.631	2.72027	21.7376	10.1121	41.0968	23.0526	23.2957	9.8028	4.4268	44.4011	9.47268	9	48.1796	5.49565	20.5172	21.0178	21.0252	9.40379
4796	4886	5403	5550	5971	6415	6726	1759	16	4643	0.013511	0.0637156	0.019293	1.05296	-0.639992	0.089072	-0.0893673	-0.021699	-17992	0.268205	17.7051	18.8764	18.5808	16.9688	-0.447088	0.446595	1.01735	51.5477	28.5219	24.83	12.0713	0.238175	19.441	3.05534	23.0229	16.9688	17.8785	22.2703	19.109	17.5474	-26.2035	27.3354	17.7051	18.1419	28.2777	24.2301	29.1325	27.5891	32.8322	30.2746
731	517	357	326	290	296	257	59	8	91	-0.204047	-0.373174	-0.291169	0.597458	-0.88588	0.443425	0.571429	0.150506	1194.75	-0.662799	6.88239	6.35786	6.66444	8.02596	0.829827	0.762559	0.84224	8.82563	18.7367	24.83	3.893	-0.588722	37.0329	2.65602	19.084	8.02596	25.8175	17.7	19.6486	7.09397	10.6111	38.1577	6.88239	6.61911	25.2848	14.071	24.5483	22.7759	26.6129	19.3639
1125	944	840	804	786	813	799	166	11	412	-0.100917	-0.158282	-0.14407	0.830904	-0.824153	0.249545	0.247028	0.0375251	191.5	-0.524233	9.29862	9.27931	9.33319	9.80974	0.627454	0.629578	0.940121	20.1111	19.7605	24.78	5.49586	-0.465574	27.3227	2.70354	21.1831	9.80974	37.2122	22.0361	21.5399	9.43539	5.76399	45.0111	9.29862	9.22871	35.0421	20.5947	20.0395	21.0936	19.5711	17.8691
822	697	447	427	371	384	340	77	12	138	-0.180978	-0.38431	-0.25829	0.6	-0.889527	0.383929	0.578709	0.117473	1587	-0.636848	7.53025	6.97953	7.26848	8.86634	0.833336	0.726803	0.843433	18.6978	19.5709	24.67	4.25432	-0.565642	34.1021	2.69487	19.6801	8.86634	59.4352	22.0682	23.4079	7.64603	11.6643	45.9834	7.53025	7.18552	32.5037	23.9035	23.678	22.015	25.5801	24.4404
1033	813	589	565	557	630	586	102	21	187	-0.0947955	-0.250769	-0.135314	0.599589	-0.874539	0.445104	0.471493	0.126761	1448	-0.51339	8.26703	8.36821	8.57262	9.33319	0.778321	0.76352	0.84324	19.1547	19.6303	24.54	4.67233	-0.455963	37.6237	2.69759	19.8233	9.33319	28.2349	19.1231	21.2162	8.38247	11.3133	51.112	8.26703	8.22783	28.4253	23.154	21.5169	21.4923	22.8821	21.9232
705	490	324	311	271	257	218	83	9	75	-0.208955	-0.396011	-0.29815	0.59434	-0.830612	0.477352	0.590909	0.171885	1196.75	-0.668054	6.77517	6.01846	6.35786	7.88374	0.839151	0.781531	0.840772	15.0634	19.1641	24.45	4.36207	-0.593405	30.3447	2.67606	19.5099	7.88374	24.2777	18.0404	18.1997	6.86829	10.617	36.0076	6.77517	6.47127	25.6965	27.4775	25.2425	23.2679	27.2879	27.769
1770	1551	1395	1359	1300	1320	1279	1068	1009	1143	-0.0504518	-0.103129	-0.0720336	0.95797	-0.311412	0.0490849	0.12432	0.0414018	-2086.5	-0.416081	11.0766	10.8548	10.9696	11.5754	0.499092	0.366142	0.985789	27.5377	21.0458	24.38	10.2217	-0.369509	24.4525	2.76093	25.0664	11.5754	23.5242	25.9757	24.9601	11.1736	-12.7783	28.008	11.0766	10.9139	45.0246	22.9342	19.0851	20.7482	17.0162	17.2891
2716	2453	2242	2382	2598	2816	3013	745	12	2168	0.141161	0.0968336	0.201561	1.0517	-0.69629	0.157568	-0.121733	0.11897	-9426.75	0.586321	13.3551	14.4433	14.1214	13.4865	-0.495605	0.540118	1.01694	50.5089	28.0934	24.36	9.06537	0.52068	24.4948	3.03996	24.0075	13.4865	16.7297	23.6433	22.406	13.0882	-21.1245	31.3793	13.3551	13.7472	35.7244	36.9849	21.5379	23.8034	19.0608	26.5115
1003	780	637	604	563	594	574	186	70	353	-0.0935622	-0.192661	-0.133558	0.954545	-0.761538	0.198638	0.214953	0.0916221	1.25	-0.511159	8.45303	8.31069	8.40612	9.20516	0.599029	0.583473	0.984613	18.7332	19.5755	24.33	5.70827	-0.453977	26.0314	2.69507	22.1193	9.20516	27.31	22.1719	21.2873	8.60425	1.07722	29.8494	8.45303	8.25726	33.9447	19.6636	21.4344	21.6062	22.6227	19.6703
744	549	360	379	381	413	361	62	6	120	-0.0603829	-0.264977	-0.0861725	0.589342	-0.887067	0.453303	0.489824	0.192372	1034.25	-0.441695	7.2368	7.12037	7.44703	8.18824	0.788279	0.76818	0.838409	47.3886	26.8636	24.24	3.95789	-0.392318	54.0442	2.99494	27.7322	8.18824	34.4201	30.1665	33.5685	7.11379	10.1129	37.0496	7.2368	7.2495	20.171	50.7852	29.2148	28.3584	33.4056	43.7699
976	964	886	1354	2018	2376	2744	451	11	1316	0.443467	0.408952	0.633186	1.02393	-0.532158	0.271721	-0.418752	0.297662	-9749.5	0.858705	11.063	14	13.3439	9.87853	-0.748145	0.647701	1.00792	99.3929	58.5466	24.22	7.66877	0.762583	52.1444	3.883	29.5464	9.87853	81.1009	27.7812	31.3606	9.60457	-21.3629	17.7963	11.063	12.6369	17.1351	148.042	43.4953	54.6997	-2.40841	35.5593
737	514	345	337	307	335	277	54	7	91	-0.118314	-0.307888	-0.168836	0.529412	-0.894942	0.498623	0.56231	0.187758	1161.75	-0.552698	6.95894	6.51868	6.94515	8.0104	0.825389	0.792971	0.808968	36.7405	23.3117	24.19	3.77976	-0.490922	47.9037	2.85666	23.8624	8.0104	22.0212	24.0585	27.6373	7.01358	10.5125	37.1359	6.95894	6.746	24.3683	31.5013	27.6827	25.8925	30.6773	32.5594
721	513	334	346	302	345	292	64	8	74	-0.10231	-0.307006	-0.145996	0.613971	-0.875244	0.572254	0.508824	0.195665	1112.5	-0.526559	7.02035	6.63429	7.01358	8.0052	0.798342	0.830226	0.849929	41.6667	24.8309	24.1	4	-0.467706	46.4857	2.91741	25.5144	8.0052	28.1532	26.9664	30.2842	6.93823	10.3618	36.0196	7.02035	6.70917	27.7843	46.957	29.1096	27.0912	32.2341	41.231
904	652	510	496	467	486	473	169	59	306	-0.0782241	-0.198529	-0.111654	0.997706	-0.740798	0.175202	0.199632	0.135593	-82.5	-0.481531	7.91578	7.79149	7.86222	8.67127	0.584445	0.55956	0.999235	21.7058	19.9956	24.08	5.52877	-0.427675	29.4753	2.71422	23.4701	8.67127	16.5572	22.7813	22.9639	7.98957	-4.35329	16.4752	7.91578	7.7584	29.4802	27.6846	22.6507	22.5168	24.4972	25.7299
929	726	552	512	463	460	425	88	7	216	-0.102897	-0.235745	-0.146874	0.668151	-0.878788	0.350376	0.415205	0.110395	997.75	-0.527613	8	7.51847	7.71944	8.98764	0.746026	0.704982	0.874229	19.0042	19.6106	24.06	4.44796	-0.468599	39.6815	2.69668	20.1038	8.98764	33.0441	20.1831	22.7056	8.20313	9.99249	46.2311	8	7.73619	33.1566	14.8482	22.4662	21.8823	24.3889	18.1074
1190	1008	840	839	867	946	966	206	9	601	-0.0250153	-0.115661	-0.0357125	1.02503	-0.795635	0.141429	0.103448	0.0842191	-1096.5	-0.329311	9.43164	9.88536	9.81666	10.0266	0.469434	0.52101	1.00828	27.0065	20.9377	24.05	5.90594	-0.292461	33.8307	2.75619	24.6842	10.0266	36.0066	26.3195	27.7575	9.43539	-10.3118	20.6364	9.43164	9.53542	31.1633	31.4959	20.1893	21.4665	19.3876	23.8962
970	825	680	635	505	528	480	110	10	291	-0.202476	-0.293103	-0.289026	0.853659	-0.866667	0.215633	0.363636	0.0219346	847	-0.661169	8.59524	7.82974	8.08248	9.37889	0.713766	0.59966	0.948625	30.2377	21.6333	24	4.79142	-0.587207	25.8795	2.78638	22.2055	9.37889	49.1693	24.063	23.2982	8.79366	9.46152	49.3784	8.59524	7.96337	48.9598	15.3552	23.2483	22.5202	25.4478	19.2493
1825	1672	1416	1384	1298	1313	1248	1063	1012	1065	-0.0630631	-0.145205	-0.0900396	0.892628	-0.364234	0.079118	0.200287	0.0408129	-1008.75	-0.448206	11.1441	10.7664	10.9502	11.8689	0.585083	0.429298	0.962846	31.4413	21.9159	23.88	10.2057	-0.398038	24.6725	2.79846	24.6749	11.8689	29.6744	25.9181	24.9638	11.2293	-10.0291	30.2528	11.1441	10.9083	47.4002	23.6299	19.3895	21.039	17.483	18.0514
1769	1563	1385	1377	1315	1322	1285	1072	1009	1128	-0.040571	-0.100704	-0.0579261	0.934221	-0.314139	0.0619543	0.134253	0.0474553	-1941.25	-0.386923	11.1253	10.8718	10.9752	11.6052	0.512044	0.395692	0.977574	31.6985	21.9779	23.88	10.2345	-0.343615	24.2279	2.8011	24.9456	11.6052	24.9538	25.9248	24.835	11.1468	-12.4746	28.0878	11.1253	10.9557	45.3797	27.5788	19.3871	21.0965	17.3444	20.1965
1724	1533	1349	1325	1334	1396	1310	1089	1007	1070	-0.0104869	-0.0742817	-0.0149729	0.872067	-0.289628	0.104977	0.141899	0.0604214	-1748.75	-0.246472	10.9834	10.9418	11.1762	11.5305	0.521587	0.471735	0.955396	40.8075	24.5505	23.87	10.2883	-0.218885	22.9618	2.90639	24.9662	11.5305	27.096	26.1275	24.6624	11.0494	-12.0478	27.9573	10.9834	11.0083	39.5471	24.911	20.4379	22.2928	18.515	19.5794
797	577	413	402	335	331	316	110	9	195	-0.198839	-0.352872	-0.283766	0.942029	-0.809359	0.171975	0.378734	0.130068	662.75	-0.657133	7.38032	6.81128	6.9174	8.32515	0.72351	0.556102	0.98029	14.3602	19.0988	23.84	4.79142	-0.58367	26.1538	2.67302	19.9285	8.32515	25.4106	18.826	17.7031	7.44703	8.71866	36.6058	7.38032	6.94515	34.348	29.3346	23.9562	22.5142	26.1227	27.8846
4367	4482	4738	4786	5655	6339	6699	1749	1013	4634	0.0716175	0.099186	0.102266	0.978058	-0.609772	0.0826487	-0.0881904	0.0186413	-17578.8	0.467638	16.8522	18.8511	18.5072	16.4876	-0.445117	0.435591	0.992632	36.6992	23.2999	23.76	12.0484	0.415279	11.8151	2.85617	25.5439	16.4876	16.7374	26.0439	20.4001	16.7957	-26.0014	29.9985	16.8522	17.816	22.3254	25.8378	28.7538	25.9111	30.3182	29.2123
822	572	404	354	314	330	264	63	1	172	-0.211394	-0.37006	-0.301677	0.8327	-0.88986	0.209195	0.446271	0.146329	873.25	-0.670678	7.07404	6.41507	6.91042	8.30103	0.764187	0.593632	0.940797	34.0351	22.5682	23.75	3.97906	-0.595705	35.1767	2.82596	23.1413	8.30103	14.2911	21.9363	23.5221	7.39254	9.55828	38.2088	7.07404	6.79688	27.1441	2.64397	26.9173	24.7821	29.2395	13.9668
969	743	600	610	613	620	616	288	67	446	-0.0899183	-0.194534	-0.128353	1.21357	-0.612382	0.0580781	0.099926	0.101124	-811.75	-0.504432	8.48093	8.50864	8.52702	9.05725	0.464044	0.387261	1.06665	28.4618	21.2396	23.74	6.60385	-0.448005	19.6553	2.76938	24.5431	9.05725	26.2075	25.459	22.7956	8.43433	-9.32841	14.4343	8.48093	8.49481	28.3083	38.3262	21.9364	22.7062	22.6666	29.9118
2589	1975	1942	1804	2083	2234	2531	1389	54	1180	0.132067	0.12378	0.188574	0.696013	-0.296709	0.364395	0.0567148	0.137464	-3030.25	0.573448	12.1734	13.628	13.0726	12.5465	0.384207	0.714262	0.886215	8.09461	18.709	23.69	11.1575	0.509251	9.01418	2.65471	25.9772	12.5465	-3.22332	24.0758	16.7956	12.4762	-14.4708	31.3657	12.1734	12.7711	30.1056	13.5184	19.1012	20.3774	17.8448	12.1831
883	628	404	358	352	376	315	89	18	92	-0.138028	-0.344754	-0.196985	0.447712	-0.85828	0.537688	0.64183	0.190786	1634.5	-0.58185	7.10059	6.80409	7.21765	8.56354	0.862595	0.813162	0.765009	9.17695	18.7517	23.59	4.46475	-0.5168	35.4476	2.65673	18.7791	8.56354	14.8013	15.0999	16.6205	7.39254	11.7795	44.0418	7.10059	7.0607	20.5663	5.46842	23.4531	21.9825	25.4397	12.8636
1369	1238	1164	1154	1179	1306	1416	333	64	1094	-0.0383586	-0.0690846	-0.0547656	1.31633	-0.731018	-0.00736648	-0.0681219	0.0249215	-4002	-0.379754	10.489	11.2293	10.9307	10.7376	-0.408409	-0.194575	1.09594	1.67446	18.6681	23.51	6.9313	-0.337252	22.6679	2.65277	26.3829	10.7376	41.456	28.5445	27.2673	10.5192	-15.8767	23.5298	10.489	10.5642	36.4911	27.7686	18.5758	20.135	16.5173	19.6738
818	576	435	399	384	399	389	86	9	192	-0.132812	-0.267327	-0.189551	0.798799	-0.850694	0.268571	0.368171	0.13904	628.75	-0.574436	7.36192	7.29989	7.36192	8.32034	0.716721	0.645188	0.927853	0.159577	18.7113	23.5	4.414	-0.510207	36.6769	2.65482	19.6224	8.32034	17.332	16.9364	18.7933	7.57698	8.56695	37.3908	7.36192	7.26848	23.9115	13.6406	22.947	22.3059	25.0419	17.8631
1158	994	840	889	818	866	925	134	8	613	-0.111111	-0.193277	-0.158622	1.12649	-0.865191	0.0459144	0.135351	0.042735	-905.75	-0.54132	9.6154	9.74348	9.53175	9.97996	0.513437	0.358082	1.0405	32.8109	22.253	23.46	5.11723	-0.48075	30.2718	2.81274	24.6641	9.97996	40.3476	26.4809	27.1126	9.43539	-9.67541	21.1801	9.6154	9.35229	42.1815	46.5553	21.0962	22.1985	20.9815	32.5494
743	580	395	401	307	332	269	64	6	62	-0.207951	-0.382598	-0.29676	0.521236	-0.889655	0.613707	0.622378	0.118304	1544.75	-0.667014	7.3742	6.45531	6.92436	8.33955	0.853791	0.849807	0.804782	41.9208	24.9151	23.33	4	-0.592453	35.1812	2.9207	25.6389	8.33955	47.4819	27.7018	29.4647	7.33723	11.5599	42.9431	7.3742	6.746	40.8964	40.6384	29.0664	26.4578	31.191	37.5353
937	638	462	401	374	395	342	71	11	164	-0.206266	-0.354565	-0.294384	0.832237	-0.888715	0.299145	0.432099	0.14642	1013	-0.665229	7.3742	6.99319	7.33723	8.60875	0.75601	0.668797	0.940623	14.232	19.0873	23.33	4.14082	-0.590848	33.4101	2.67248	19.5795	8.60875	1.29794	13.2938	14.1992	7.73061	10.0431	42.4342	7.3742	7.20483	26.1377	-0.826503	23.3234	22.0989	25.4165	8.50719
845	653	506	498	463	466	448	78	7	260	-0.133259	-0.255769	-0.190202	0.832041	-0.880551	0.196291	0.339487	0.0980392	512.25	-0.575094	7.92641	7.65172	7.75286	8.6757	0.697602	0.581165	0.940549	25.933	20.7269	23.28	4.27266	-0.510778	38.5837	2.74691	21.5565	8.6757	36.5346	22.4329	24.7405	7.96863	8.0013	39.3751	7.92641	7.73619	30.4972	30.8589	23.1569	22.9426	25.2256	28.0151
3362	3444	3487	3745	4763	5388	5767	1704	1012	4103	0.132587	0.138677	0.189324	1.06809	-0.505226	0.0519871	-0.17082	0.063201	-18097.5	0.574207	15.5293	17.9329	17.5311	15.1015	-0.554855	0.37322	1.0222	48.7776	27.4005	23.04	11.9442	0.509918	7.77516	3.01476	23.4438	15.1015	20.3315	23.2347	15.1913	15.1641	-26.2546	33.6108	15.5293	16.8252	21.9251	30.7742	25.6662	24.5532	28.5781	30.5516
1915	1810	1898	1830	1865	1977	2038	370	21	1471	-0.041141	-0.0174255	-0.0587424	1.07437	-0.79558	0.0860516	-0.0184382	-0.0178308	-4754.25	-0.388732	12.2316	12.6785	12.5507	12.1869	-0.264184	0.441489	1.0242	2.10873	18.6594	23.04	7.17905	-0.345216	20.945	2.65236	26.6481	12.1869	32.4476	28.7094	26.9116	12.3813	-16.8149	30.2616	12.2316	12.3091	41.4807	20.4192	18.7637	20.1978	17.0512	15.828
787	597	359	331	323	363	306	54	7	70	-0.111455	-0.350679	-0.159053	0.390244	-0.909548	0.607843	0.684062	0.198661	1675.75	-0.54181	6.9174	6.73866	7.13349	8.42025	0.881113	0.847092	0.730767	13.5893	19.0322	23.01	3.77976	-0.481245	48.8158	2.66991	19.0514	8.42025	36.9844	19.3736	23.33	7.10719	11.8778	41.6715	6.9174	6.86121	19.6378	16.4605	24.1224	22.3357	26.0425	20.3943
1120	919	730	674	539	559	520	143	10	319	-0.183144	-0.291637	-0.261439	0.882937	-0.844396	0.224787	0.347507	0.0531777	892.75	-0.639426	8.76772	8.04145	8.23766	9.72236	0.703053	0.608029	0.959349	20.2879	19.7855	22.96	5.22932	-0.56789	22.9162	2.70468	20.3559	9.72236	32.6744	20.4632	18.3692	9.00411	9.6289	51.2952	8.76772	8.13822	49.87	12.0934	21.7677	21.182	23.446	15.6347
728	558	388	373	284	299	242	69	6	169	-0.225908	-0.389788	-0.322379	0.832653	-0.876344	0.183575	0.464567	0.112636	890	-0.685681	7.1984	6.23168	6.68688	8.23275	0.774491	0.568335	0.94078	47.0881	26.7496	22.9	4.10157	-0.609038	32.3185	2.9907	27.5536	8.23275	44.6836	29.8667	31.1665	7.29363	9.619	37.4602	7.1984	6.57314	39.5217	26.5521	31.3214	28.1639	32.8087	31.5507
927	675	498	439	431	442	411	125	32	187	-0.12036	-0.266417	-0.171791	0.685422	-0.814815	0.352941	0.431601	0.139153	1016	-0.555905	7.60014	7.43499	7.61741	8.77205	0.75572	0.706698	0.881697	1.12365	18.6814	22.88	5	-0.493735	30.6499	2.6534	19.1838	8.77205	17.2071	16.2347	16.3992	7.92641	10.0531	44.1222	7.60014	7.55369	24.2905	2.53256	22.3097	21.6736	24.1828	9.87108
1992	1793	1697	1522	1760	1874	1870	239	9	1290	0.13108	0.103948	0.187162	0.839746	-0.866704	0.262646	-0.0169956	0.106254	-4347.75	0.572013	11.5028	12.3201	12.3289	12.1486	-0.257106	0.640409	0.943444	44.0798	25.653	22.81	6.20582	0.507979	74.0302	2.94926	24.8253	12.1486	23.5329	25.6254	27.8838	11.9278	-16.3213	29.1111	11.5028	12.0736	29.0146	5.74768	20.4007	22.6349	17.4934	6.80965
865	669	560	613	648	728	732	219	11	257	-0.00810081	-0.0967213	-0.0115635	0.854809	-0.672646	0.363861	0.173684	0.116719	-52.5	-0.226133	8.49481	9.01233	8.99588	8.74598	0.557939	0.713913	0.949051	39.9369	24.2731	22.75	6.02765	-0.200837	37.7397	2.8954	24.9308	8.74598	35.2068	26.5926	28.7902	8.24257	-3.74444	19.3592	8.49481	8.6535	24.7655	58.6704	23.5651	25.2053	23.4769	39.4878
1990	2013	1762	1798	1575	1611	1558	1106	1009	1263	-0.0757021	-0.14148	-0.108088	0.900925	-0.450571	0.0903853	0.192182	-0.00284576	-1255.75	-0.47635	12.1599	11.5928	11.7228	12.6264	0.577082	0.448779	0.96582	44.6981	25.8719	22.72	10.3415	-0.423028	26.1532	2.95762	25.1955	12.6264	40.226	27.1126	26.7082	12.0782	-10.7887	32.607	12.1599	11.6348	59.4253	31.8388	20.6622	22.6777	18.4453	23.3644
1971	1876	1725	1697	1524	1549	1479	1091	1008	1292	-0.0744316	-0.116002	-0.106274	0.951548	-0.418443	0.0698344	0.140426	0.00101346	-2076.5	-0.47367	11.9278	11.3935	11.5705	12.3333	0.519775	0.411803	0.983581	40.6568	24.5021	22.68	10.2946	-0.420648	25.704	2.90447	24.9562	12.3333	32.216	26.463	25.8688	11.9931	-12.7578	30.9691	11.9278	11.5079	55.3611	24.4732	20.1167	22.0678	17.8184	18.7954
1062	750	563	523	472	498	476	138	37	284	-0.072381	-0.212611	-0.103318	0.915811	-0.816	0.263294	0.254181	0.158131	313.25	-0.469237	8.05689	7.80793	7.92641	9.0856	0.633453	0.640935	0.97111	14.3579	19.0986	22.57	5.16765	-0.416749	34.277	2.67301	20.4199	9.0856	2.62081	15.1122	16.3103	8.25726	6.79147	38.8814	8.05689	7.78599	33.7359	15.1158	22.0687	21.5046	23.8495	17.8527
852	680	536	549	484	529	481	139	9	317	-0.0839232	-0.200353	-0.11979	0.997792	-0.795588	0.176623	0.201413	0.0980227	-73	-0.492955	8.18824	7.83517	8.08758	8.79366	0.586178	0.561069	0.999264	54.7602	29.907	22.48	5.1801	-0.437818	32.6289	3.10402	27.7661	8.79366	43.3287	30.1422	31.5202	8.1231	-4.17934	17.8034	8.18824	7.85142	36.5981	41.0459	30.1049	29.6052	34.677	40.4081
858	674	488	485	453	469	417	111	10	133	-0.117984	-0.272899	-0.168399	0.587013	-0.835312	0.486486	0.497778	0.120324	1330	-0.552221	7.85683	7.471	7.76946	8.76772	0.792523	0.786485	0.837303	31.2334	21.8662	22.43	4.8059	-0.490465	33.2024	2.79635	22.2631	8.76772	39.2679	23.5374	24.7187	7.87299	10.9972	46.1414	7.85683	7.68009	29.6505	33.6698	24.0492	23.5152	26.5201	30.4883
715	544	341	343	358	386	371	178	8	117	0.0695771	-0.162393	0.0992981	0.604592	-0.672794	0.540275	0.393086	0.237563	808.25	0.46307	7	7.18552	7.28108	8.16331	0.732536	0.814464	0.845579	40.6179	24.4896	22.38	5.62523	0.411297	81.9802	2.90398	25.1336	8.16331	44.231	27.1248	27.2776	6.98637	9.31498	33.8084	7	7.10059	16.2071	39.1551	27.611	26.4857	31.1507	36.7919
1336	1049	837	975	1274	1568	1563	369	16	830	0.21958	0.109885	0.313498	0.963303	-0.648236	0.223573	-0.0913816	0.224641	-3453.5	0.679326	9.91596	11.6052	11.6176	10.1607	-0.450422	0.606932	0.987615	91.8622	52.485	22.36	7.17258	0.603297	57.1927	3.74408	33.3221	10.1607	14.3253	38.2923	40.8153	9.42414	-15.1154	17.5809	9.91596	10.8407	18.0018	72.1976	42.4423	47.626	39.6323	56.1466
3764	3549	3390	3615	4435	4831	5062	1946	1015	3326	0.141011	0.11848	0.201353	0.865645	-0.451677	0.150338	-0.0468645	0.0988237	-11668.2	0.586119	15.3474	17.1701	16.9049	15.2535	-0.360535	0.531729	0.953045	51.6674	28.5719	22.08	12.4848	0.520496	7.86235	3.05712	23.6481	15.2535	19.019	23.3798	15.4088	15.0222	-22.6813	32.3673	15.3474	16.4298	24.1685	30.8088	24.9411	25.1117	27.4491	29.699
2597	2576	2502	2696	3536	3889	4180	1646	1013	2770	0.150857	0.136585	0.215408	1.00206	-0.361025	0.100795	-0.137596	0.0895197	-11753.2	0.599451	13.9179	16.1086	15.7258	13.7082	-0.51626	0.465386	1.00069	35.6291	22.9985	22.07	11.8071	0.532339	6.94629	2.8438	25.5364	13.7082	26.2962	26.871	19.2072	13.5757	-22.7363	32.2952	13.9179	15.2348	22.9644	37.5271	22.3022	22.0007	24.0971	30.6001
2309	2323	2411	2674	3214	3527	3802	621	13	2763	0.149559	0.167682	0.213554	1.09328	-0.732673	0.0823647	-0.210669	0.0717998	-13373	0.597727	13.8799	15.6076	15.2219	13.2439	-0.595023	0.435091	1.03017	72.2334	39.031	22.04	8.5316	0.530808	31.5184	3.39211	22.6	13.2439	32.3213	23.3645	24.1246	13.4091	-23.7361	32.3913	13.8799	14.7576	27.5556	42.7408	26.9414	30.5036	22.8759	32.2081
1335	1233	1212	1140	1031	1159	1108	247	11	770	-0.0730412	-0.0815789	-0.104283	0.946514	-0.799676	0.152449	0.108813	-0.00873908	-1411.25	-0.470693	10.4464	10.3478	10.5042	10.7231	0.477412	0.534205	0.981844	40.4785	24.4449	21.78	6.27431	-0.418012	23.3518	2.90221	24.9628	10.7231	46.9755	26.9649	25.7166	10.6619	-11.2168	26.789	10.4464	10.1023	48.288	15.1308	21.2846	22.7506	20.5794	15.3176
4500	4562	4766	4955	5681	6232	6577	1599	18	4769	0.0993953	0.121002	0.141931	1	-0.649496	0.0990838	-0.121002	0.039597	-19593.2	0.521626	17.0483	18.736	18.4025	16.5851	-0.494611	0.462737	1	53.8276	29.4955	21.6	11.6936	0.463221	9.59895	3.08972	22.5298	16.5851	17.8123	21.5011	13.9911	16.8287	-26.9589	30.4279	17.0483	17.8433	24.0978	24.7642	28.3158	27.172	32.0732	29.9811
868	644	468	438	361	364	328	71	9	183	-0.212435	-0.35865	-0.303189	0.828947	-0.889752	0.24846	0.4375	0.111954	988.75	-0.671797	7.59436	6.89643	7.14004	8.63566	0.759147	0.628664	0.939382	21.8189	20.0131	21.53	4.14082	-0.596681	32.8952	2.71501	20.508	8.63566	25.5282	19.6657	20.6179	7.76394	9.96236	42.5131	7.59436	7.12037	37.1278	18.2815	24.1311	22.5782	26.2684	21.6759
857	691	506	494	396	397	358	153	64	227	-0.174014	-0.319962	-0.248369	0.912921	-0.778582	0.221269	0.360236	0.0903371	750.75	-0.628587	7.90513	7.10059	7.3496	8.84082	0.711534	0.60484	0.970088	30.663	21.7317	21.37	5.34848	-0.558292	22.4924	2.7906	22.3492	8.84082	45.2541	24.0288	22.1732	7.96863	9.08863	42.0324	7.90513	7.34342	42.2002	28.7414	24.7787	23.3176	27.1918	28.387
1334	1121	1077	991	976	967	955	263	28	651	-0.0355769	-0.0555556	-0.0507934	0.922233	-0.765388	0.212817	0.0957967	0.0407482	-1257	-0.370342	9.96991	9.84769	9.88877	10.3881	0.457562	0.597039	0.973375	21.5547	19.9724	21.36	6.40696	-0.328894	26.9158	2.71317	24.8121	10.3881	28.2795	26.0031	25.7136	10.2503	-10.7922	25.0296	9.96991	9.91935	37.6784	10.0531	19.3796	20.7645	18.0284	10.0923
1877	1700	1516	1455	1375	1391	1346	1067	1006	1159	-0.0634865	-0.120264	-0.0906451	0.92809	-0.372353	0.0705694	0.156856	0.0288277	-1677	-0.449209	11.3315	11.0412	11.1629	11.9348	0.539304	0.413243	0.975431	23.4248	20.274	21.27	10.2185	-0.398927	24.7861	2.72676	25.0015	11.9348	26.6899	26.1456	25.2486	11.4877	-11.8808	29.8287	11.3315	11.1199	47.249	19.4743	18.7878	20.4989	16.4798	14.8216
777	533	359	335	356	376	333	57	7	97	-0.0928463	-0.282792	-0.132498	0.543624	-0.893058	0.508861	0.533813	0.199108	1142.75	-0.509804	6.94515	6.9313	7.21765	8.10791	0.811203	0.798362	0.816143	15.5559	19.2124	21.27	3.8485	-0.452816	50.3321	2.67831	19.5989	8.10791	14.6492	16.3652	20.7213	7.10719	10.4548	37.8741	6.94515	7.08734	14.7834	19.5084	23.6819	22.9207	26.028	22.2228
2173	1973	1716	1781	1870	1883	1734	1207	1011	1370	0.0706742	0.00101266	0.100911	0.836621	-0.388241	0.181356	0.0879515	0.094698	-2985.75	0.465564	12.1215	12.0139	12.3486	12.5423	0.444714	0.566036	0.942272	111.903	69.7191	21.27	10.6472	0.413448	12.983	4.11577	44.1741	12.5423	21.9823	54.4847	55.0592	11.9722	-14.3996	30.0069	12.1215	12.3201	38.2737	35.5486	54.6114	58.2826	63.459	60.58
1781	1595	1413	1403	1344	1376	1324	1180	1012	1163	-0.0332724	-0.0935893	-0.0475055	0.986384	-0.260188	0.0639839	0.100379	0.0467195	-2364.75	-0.362172	11.1949	10.9807	11.1226	11.6839	0.464745	0.399966	0.995441	32.4247	22.1563	21.24	10.5672	-0.321634	26.4645	2.80866	25.022	11.6839	26.9566	26.1949	25.7945	11.2214	-13.3228	27.8818	11.1949	11.0357	45.2965	27.1887	19.412	21.1534	17.3066	19.9491
820	600	452	429	413	422	373	105	9	193	-0.105134	-0.242236	-0.150054	0.827869	-0.825	0.309481	0.328904	0.134928	565.75	-0.531392	7.54199	7.1984	7.50074	8.43433	0.690276	0.676412	0.938975	32.0859	22.0725	21.13	4.71769	-0.471971	35.759	2.80511	22.7713	8.43433	25.996	22.9321	24.6716	7.67443	8.27069	37.5232	7.54199	7.44703	25.2142	22.1531	24.7645	24.1993	27.4874	24.9133
916	812	544	528	575	621	491	106	11	111	-0.200883	-0.383305	-0.286725	0.676796	-0.869458	0.530655	0.536424	0.0803043	1872.25	-0.65941	8.08248	7.88909	8.5316	9.32936	0.812524	0.809601	0.877982	54.8769	29.959	21.12	4.73262	-0.585663	26.64	3.10582	31.724	9.32936	62.0433	32.5268	32.7711	8.16331	12.325	52.1346	8.08248	8.31552	20.5133	26.7318	28.8167	28.5514	32.9278	31.7427
997	808	649	607	562	588	585	110	10	305	-0.135608	-0.241167	-0.193576	0.91498	-0.863861	0.236546	0.28254	0.0692004	461.75	-0.578474	8.467	8.36345	8.37772	9.31402	0.656185	0.618451	0.970817	6.41373	18.6633	21	4.79142	-0.513762	31.5743	2.65254	19.8132	9.31402	36.8153	20.2951	20.9179	8.65795	7.72922	44.1437	8.467	8.25237	34.5822	16.0153	20.978	21.0563	22.0691	17.0237
853	632	383	612	967	1072	1233	127	12	207	0.174569	-0.0739167	0.24917	0.904587	-0.799051	0.449468	0.123556	0.292052	-149.5	0.629262	8.49018	10.7231	10.2345	8.58168	0.498067	0.766007	0.967127	87.8256	49.4412	20.86	5.02653	0.558885	107.876	3.67026	40.4547	8.58168	26.3203	48.1876	29.3427	7.26217	-5.30738	8.86911	8.49018	9.88877	6.52174	169.465	42.3879	49.4399	29.4123	52.7404
923	714	594	582	545	558	531	119	7	285	-0.121813	-0.211196	-0.173879	0.817204	-0.833333	0.24	0.305302	0.0776398	436	-0.558147	8.34913	8.09776	8.23275	8.93784	0.673353	0.621447	0.934925	28.5716	21.2632	20.78	4.91868	-0.495714	31.4455	2.7704	22.1073	8.93784	31.1529	22.5936	23.2949	8.40612	7.58279	41.8895	8.34913	8.16831	32.8841	28.6413	22.5809	22.8859	24.0885	25.9418
1756	1703	1733	1694	1711	1816	1875	341	21	1313	-0.0531753	-0.0444649	-0.0759245	1.06739	-0.799765	0.0853361	0.0118835	-0.0224189	-3840.25	-0.423442	11.9208	12.3311	12.2003	11.9418	0.2282	0.440262	1.02198	24.1074	20.3918	20.7	6.98637	-0.376042	20.7305	2.73203	25.6979	11.9418	40.5937	27.7215	25.7251	12.0116	-15.6598	29.5952	11.9208	11.9605	41.7862	23.1609	18.7988	20.5336	16.4407	16.9819
1786	1579	1427	1414	1344	1341	1314	1084	1010	1163	-0.0461877	-0.0965278	-0.0659457	0.952344	-0.31349	0.0560065	0.120653	0.039219	-2163.5	-0.404013	11.2241	10.953	11.0275	11.6447	0.494135	0.382601	0.983856	28.8062	21.3138	20.69	10.2725	-0.358791	24.7042	2.7726	25.0584	11.6447	24.6822	26.0638	25.1338	11.2583	-12.9336	28.2591	11.2241	11.0357	46.2379	26.6829	19.1202	20.8367	16.9446	19.3888
758	520	330	309	277	285	234	57	11	43	-0.18068	-0.388518	-0.257813	0.366812	-0.890385	0.683824	0.721854	0.198543	1568.5	-0.636456	6.76061	6.16224	6.58084	8.04145	0.89705	0.881011	0.715838	11.7184	18.8923	20.54	3.8485	-0.565332	39.8541	2.66335	18.9709	8.04145	16.3096	15.7208	18.3273	6.91042	11.6188	39.0864	6.76061	6.51868	23.711	21.0462	24.9222	22.8409	26.7371	23.6837
1621	1523	1441	1397	1861	2127	2274	197	8	1208	0.103019	0.075569	0.147092	0.878668	-0.87065	0.189262	-0.011039	0.0814343	-3901	0.527873	11.1789	13.1501	12.8604	11.5054	-0.22266	0.574144	0.9578	35.1678	22.8717	20.54	5.81865	0.468784	80.9172	2.83857	25.1338	11.5054	39.4741	27.0163	27.4707	11.295	-15.742	27.0527	11.1789	12.3003	20.4052	21.761	19.4247	21.5	16.5018	16.2056
830	632	458	436	337	348	280	67	13	107	-0.241192	-0.385965	-0.344223	0.578571	-0.893987	0.447028	0.59194	0.0957552	1515.75	-0.700831	7.58279	6.54213	7.03385	8.58168	0.839639	0.764619	0.83327	39.2443	24.0572	20.53	4.06155	-0.622474	31.6453	2.88679	24.6596	8.58168	34.3308	26.1986	27.1429	7.70824	11.4871	46.0447	7.58279	6.95894	42.2069	22.8378	27.6679	25.3431	29.9134	27.1998
825	668	501	468	356	375	291	44	8	108	-0.276433	-0.403361	-0.394531	0.623239	-0.934132	0.44898	0.581065	0.0506869	1596	-0.733433	7.76394	6.62671	7.21125	8.74162	0.834465	0.76573	0.854184	49.2096	27.5709	20.46	3.53035	-0.651423	36.3383	3.021	28.7389	8.74162	48.7313	31.0077	33.0843	7.94229	11.6863	48.572	7.76394	7.08734	45.3395	17.3206	30.3659	27.7609	32.8476	26.2619
789	560	404	395	361	362	344	79	8	193	-0.14936	-0.303842	-0.213156	0.923077	-0.858929	0.215447	0.339713	0.147679	530.5	-0.597355	7.33723	7.0068	7.12694	8.24257	0.697757	0.599488	0.973672	19.6672	19.6991	20.36	4.29084	-0.530572	36.6291	2.70074	20.615	8.24257	21.5092	19.1854	21.0531	7.39254	8.09522	34.5979	7.33723	7.12037	27.2568	30.6485	23.9202	22.9934	26.3199	28.7438
1453	1491	1330	1479	2244	2648	2805	279	11	1338	0.275796	0.222222	0.393791	0.868118	-0.812877	0.273024	-0.154043	0.17596	-6437.25	0.732974	11.3935	14.103	13.8348	11.4242	-0.53606	0.648734	0.953951	64.3539	34.5839	20.32	6.53434	0.650923	73.6137	3.25805	24.6871	11.4242	61.2643	26.4763	28.6198	10.9972	-18.6023	25.1285	11.3935	13.092	17.8189	54.1804	24.5955	28.9068	16.2972	32.3861
1110	913	721	651	540	569	508	102	9	278	-0.173312	-0.285011	-0.247403	0.742126	-0.88828	0.292621	0.415504	0.0575163	1252.5	-0.627771	8.66683	7.97911	8.28649	9.70116	0.746205	0.663899	0.90537	25.1786	20.5849	20.25	4.67233	-0.55754	29.5476	2.74063	20.9331	9.70116	33.7058	21.3393	21.4512	8.96696	10.7794	54.011	8.66683	8.14325	45.5903	6.48693	22.2184	21.5911	24.059	12.4561
961	797	556	541	540	614	566	130	63	189	-0.043152	-0.219587	-0.0615963	0.601961	-0.836888	0.459227	0.443841	0.138986	1312.75	-0.394928	8.14828	8.2719	8.49942	9.27156	0.762797	0.771512	0.84435	25.6379	20.6708	20.24	5.0658	-0.350752	40.3432	2.74443	20.9934	9.27156	44.1952	22.4385	25.0678	8.2229	10.9495	48.8859	8.14828	8.14325	26.7787	27.246	22.2696	22.1067	23.9918	25.098
764	557	401	371	293	301	260	75	10	139	-0.230061	-0.378713	-0.328312	0.824701	-0.86535	0.287179	0.458115	0.117226	955	-0.689862	7.18552	6.3825	6.70176	8.22783	0.770888	0.659758	0.937775	21.8539	20.0186	20.2	4.21716	-0.612747	30.4988	2.71526	20.5371	8.22783	29.8395	20.3273	20.652	7.3742	9.84769	38.7784	7.18552	6.64185	36.5777	16.4643	25.3886	23.2122	27.2094	21.3095
717	508	325	316	289	329	357	53	9	85	-0.0586319	-0.27478	-0.0836681	0.577855	-0.895669	0.545455	0.505185	0.214976	1058	-0.437374	6.81128	7.09397	6.90344	7.97911	0.796435	0.817058	0.832926	24.8565	20.5258	19.94	3.75629	-0.388488	57.9859	2.738	20.9781	7.97911	27.5571	20.6182	25.0336	6.87534	10.1897	34.9641	6.81128	6.61149	22.8608	30.737	25.8502	23.9667	28.1863	30.2294
1045	877	626	582	502	502	454	218	13	242	-0.172285	-0.329795	-0.245924	0.803167	-0.751425	0.292398	0.423701	0.0857977	1312	-0.626518	8.34913	7.68573	7.94757	9.57194	0.751081	0.66373	0.929541	15.7067	19.2276	19.86	6.01846	-0.556436	17.4909	2.67902	19.4919	9.57194	41.6145	20.4715	16.2994	8.55444	10.9474	51.4535	8.34913	7.94757	39.6506	14.6832	21.8224	21.0631	23.5303	17.3344
880	807	565	600	404	404	324	127	54	152	-0.243124	-0.402259	-0.347018	0.613372	-0.842627	0.387097	0.585462	0.039932	1880	-0.702723	8.43433	6.86829	7.39254	9.31018	0.836565	0.728797	0.849652	68.138	36.6514	19.85	5.02653	-0.624132	20.7435	3.32172	39.9873	9.31018	72.2728	36.7557	36.004	8.26703	12.342	53.01	8.43433	7.39254	63.913	50.3899	38.2251	34.4611	39.5581	48.3087
808	611	435	399	307	310	240	52	6	112	-0.273792	-0.422584	-0.39073	0.564516	-0.914894	0.377778	0.627164	0.0965732	1514	-0.73107	7.36192	6.21447	6.7679	8.48556	0.855974	0.722901	0.826467	38.2791	23.7633	19.76	3.73251	-0.649342	33.6284	2.87498	24.3269	8.48556	34.5096	25.7812	27.153	7.57698	11.4826	44.8865	7.36192	6.746	40.3728	13.6406	28.0649	25.3043	29.6189	21.4597
731	503	350	317	273	299	245	153	10	161	-0.200686	-0.366848	-0.28637	1.07725	-0.695825	0.182741	0.334218	0.158654	507	-0.659137	6.81846	6.25732	6.68688	7.95285	0.693974	0.567473	1.02512	26.8491	20.9062	19.65	5.34848	-0.585472	20.6352	2.75481	21.7241	7.95285	19.4615	20.5193	17.5927	7.0473	7.97387	31.1013	6.81846	6.48715	26.8772	12.1743	26.5012	24.2702	28.5626	19.7051
6259	6406	6837	6704	6800	7173	7460	2009	16	2962	-0.0136397	0.0189142	-0.0194769	0.731099	-0.686388	0.383879	0.136823	-0.0286617	-3640.75	-0.269054	18.8558	19.5395	19.2856	18.5722	0.515292	0.726772	0.900863	45.6392	26.2115	19.64	12.6181	-0.238929	47.5313	2.97051	24.8756	18.5722	24.1402	25.7532	29.2125	18.9797	-15.3838	19.2432	18.8558	18.9454	31.369	31.9591	31.9788	31.0614	37.054	37.7594
1279	1090	942	860	819	844	813	196	32	536	-0.114793	-0.186072	-0.163883	0.870321	-0.820183	0.165109	0.252154	0.0365635	95	-0.54724	9.50969	9.33319	9.45034	10.2914	0.631765	0.548601	0.954758	17.0971	19.3774	19.59	5.80879	-0.486002	23.1776	2.68595	21.18	10.2914	33.3182	21.6141	19.7317	9.8028	4.5629	44.6865	9.50969	9.3561	38.4386	8.36543	19.7253	20.5826	19.4421	10.0836
753	518	353	320	281	289	259	59	5	110	-0.19661	-0.372185	-0.280556	0.64135	-0.8861	0.365994	0.546269	0.167453	1102.25	-0.654646	6.8399	6.37431	6.61149	8.03113	0.817464	0.715305	0.862379	3.25505	18.6445	19.59	3.893	-0.581481	37.7019	2.65165	19.0709	8.03113	17.3929	16.0982	18.2018	7.06738	10.3298	37.1722	6.8399	6.54991	25.7694	12.3242	24.6687	22.7146	26.5681	18.2298
839	588	425	403	384	375	376	93	11	189	-0.108214	-0.264516	-0.154443	0.80117	-0.841837	0.288136	0.364269	0.162974	650.75	-0.536524	7.38644	7.21765	7.21125	8.37772	0.71418	0.660489	0.92877	0.936796	18.6866	19.49	4.53065	-0.476534	37.8795	2.65365	19.5732	8.37772	14.6245	16.3194	18.4656	7.51847	8.66572	37.1146	7.38644	7.26848	24.7666	22.3519	22.9322	22.2087	25.023	23.1143
850	586	383	339	313	310	278	80	5	138	-0.189441	-0.383707	-0.270342	0.808429	-0.863481	0.308271	0.470514	0.183804	1055.25	-0.646603	6.97268	6.52652	6.7679	8.36821	0.777782	0.675529	0.931567	2.41541	18.6543	19.47	4.30887	-0.574325	32.641	2.65212	19.122	8.36821	10.0266	14.5947	15.3035	7.26217	10.1809	38.6089	6.97268	6.78966	23.6	5.62803	24.0548	22.2051	25.8881	13.3254
774	536	344	322	362	392	346	68	7	102	-0.0192593	-0.236448	-0.0274848	0.519637	-0.873134	0.528868	0.514124	0.232571	1092.75	-0.301785	6.85412	7.02035	7.31861	8.1231	0.801105	0.808691	0.803958	23.4919	20.2854	19.46	4.08166	-0.268048	63.022	2.72727	20.7135	8.1231	17.0963	18.5789	23.2712	7.0068	10.3001	36.5181	6.85412	7.12694	11.0835	20.6316	24.301	23.5561	26.8603	23.5361
927	948	619	1214	1851	1970	2091	560	8	399	0.452212	0.267671	0.645637	0.566118	-0.409283	0.608824	0.0101225	0.349448	-1431.5	0.864297	10.6678	12.7875	12.5359	9.82357	0.21632	0.847547	0.827248	202.909	192.448	19.44	8.24257	0.767563	40.617	5.77348	145.669	9.82357	92.2335	84.6687	89.9431	8.52243	-11.2702	13.4998	10.6678	12.2782	15.7428	233.005	180.412	200.913	140.464	101.48
1246	1251	1159	1227	2086	2433	2849	569	14	1290	0.333525	0.29916	0.476215	0.849504	-0.545164	0.285121	-0.223223	0.211967	-7003.25	0.78091	10.7057	14.1763	13.4497	10.775	-0.606614	0.658177	0.947084	12.9119	18.978	19.41	8.28649	0.693494	38.3138	2.66737	27.1027	10.775	67.478	28.0446	30.36	10.5042	-19.1323	22.7699	10.7057	12.7773	16.3144	43.8156	19.1022	20.2209	18.1356	29.1549
1779	1536	1345	1317	1329	1345	1303	1065	1007	1054	-0.0251524	-0.0912966	-0.0359118	0.863956	-0.306641	0.0964423	0.163196	0.0640223	-1494.25	-0.329923	10.9613	10.9223	11.0384	11.538	0.546474	0.458588	0.952425	26.1534	20.7694	19.27	10.2121	-0.292995	23.457	2.74879	24.8744	11.538	20.8018	25.4353	24.0517	11.0384	-11.4325	28.3438	10.9613	10.9945	39.2549	24.2141	18.9657	20.6553	16.7847	17.8565
738	562	409	433	398	524	405	188	8	202	0.113759	-0.0446097	0.162373	0.642023	-0.66548	0.435754	0.26009	0.209662	244	0.545555	7.56535	7.39864	8.06202	8.25237	0.638324	0.758136	0.862681	125.033	82.9273	19.22	5.72865	0.48454	84.0759	4.3608	87.3729	8.25237	42.2419	103.398	85.8843	7.42291	6.2488	30.5773	7.56535	7.35576	28.6429	51.5577	91.7816	88.4217	105.231	101.902
1880	1738	1489	1525	1333	1345	1292	1081	1008	1111	-0.0704529	-0.146816	-0.100591	0.924207	-0.378021	0.0757072	0.185135	0.0317022	-1206.5	-0.465072	11.5104	10.8915	11.0384	12.0231	0.56994	0.423038	0.974069	43.822	25.5627	19.19	10.263	-0.413015	25.3315	2.94579	25.1473	12.0231	29.8527	26.5727	25.8803	11.4191	-10.6457	30.4909	11.5104	11.0055	57.1357	33.8422	20.937	22.623	19.6195	25.3154
2131	2069	1947	1896	1657	1690	1604	1106	1013	1347	-0.100311	-0.130292	-0.143227	0.920226	-0.465442	0.0833617	0.170911	-0.0224498	-1686.25	-0.523208	12.3769	11.7058	11.9114	12.7425	0.554954	0.43684	0.972669	41.6172	24.8146	19.05	10.3415	-0.464639	26.744	2.91677	24.9925	12.7425	31.5866	26.4734	26.1768	12.4869	-11.9026	32.8826	12.3769	11.8333	60.5028	22.3062	20.1228	22.2145	17.4699	17.268
712	438	278	246	233	225	192	59	12	118	-0.185501	-0.392687	-0.264654	0.52356	-0.865297	0.236246	0.628253	0.237834	979.75	-0.642036	6.26583	5.769	6.0822	7.59436	0.856469	0.618189	0.805976	3.24518	18.6446	19.02	3.893	-0.570316	38.7334	2.65166	19.1821	7.59436	-4.71646	10.9711	13.376	6.52652	9.93204	30.8263	6.26583	6.15345	16.0296	8.51384	25.7658	23.4633	27.508	16.5176
720	534	377	338	253	258	214	66	9	115	-0.291096	-0.441296	-0.415381	0.816425	-0.876404	0.285714	0.519203	0.102915	1092	-0.746131	6.96582	5.98142	6.3661	8.11298	0.803734	0.658634	0.934628	18.8271	19.5875	18.89	4.04124	-0.662743	28.2909	2.69563	20.0112	8.11298	37.8503	20.6631	20.3602	7.22405	10.2977	38.5586	6.96582	6.3247	38.3558	8.98815	25.9651	23.1377	26.8255	16.288
1543	1428	1278	1316	1998	2175	2323	439	10	1256	0.240642	0.187713	0.343593	0.845307	-0.692577	0.248804	-0.105543	0.173751	-5324	0.700403	10.9585	13.2439	12.9565	11.261	-0.472582	0.628954	0.945521	35.1132	22.8568	18.86	7.60014	0.622	49.2505	2.83795	25.2517	11.261	39.3697	27.1558	30.6598	10.852	-17.4614	24.6696	10.9585	12.595	16.6474	36.2543	19.4901	21.5855	16.5439	24.2425
2002	1922	1631	1560	1520	1538	1486	1104	1006	1243	-0.0441741	-0.125622	-0.063072	0.86939	-0.425598	0.0913743	0.193789	0.0344828	-1295.5	-0.398057	11.5978	11.4114	11.543	12.4332	0.578686	0.45041	0.954417	22.7449	20.1608	18.82	10.3353	-0.3535	25.1172	2.72167	24.8198	12.4332	32.7641	26.316	25.5351	11.7711	-10.9013	31.5508	11.5978	11.4978	44.7673	18.7226	18.7096	20.5916	15.9594	13.9667
1262	1087	939	832	809	828	794	139	21	623	0.0495951	-0.0235405	0.0708065	1.03086	-0.872125	0.249398	0.00834879	0.10079	-1900.5	0.413705	9.40534	9.25991	9.39024	10.282	0.202865	0.629454	1.01018	40.5163	24.457	18.8	5.1801	0.367406	89.8917	2.90269	24.9565	10.282	36.2113	26.6726	24.5971	9.79239	-12.3867	21.3057	9.40534	9.31786	36.0614	1.05182	22.4436	23.1702	23.4326	8.25022
1700	1479	1302	1298	1263	1276	1217	1065	1008	1067	-0.0333333	-0.0967742	-0.0475919	0.913793	-0.279919	0.0660832	0.141204	0.0568635	-1774.75	-0.362391	10.9083	10.6765	10.8463	11.3935	0.520733	0.404294	0.970397	37.5293	23.5406	18.68	10.2121	-0.32183	23.8047	2.86598	24.9067	11.3935	23.869	25.7741	24.537	10.9195	-12.1073	27.3487	10.9083	10.8094	42.6515	28.5118	20.121	21.8525	18.3473	21.4789
1134	998	937	865	714	747	704	148	11	470	-0.186827	-0.217073	-0.266717	0.928349	-0.851703	0.154676	0.252196	-0.0268493	155	-0.6437	9.52808	8.89592	9.07347	9.99333	0.631799	0.536794	0.975522	29.5642	21.4807	18.62	5.28957	-0.571672	22.1011	2.77982	22.5986	9.99333	46.8335	24.3819	22.4342	9.78543	5.37169	46.3119	9.52808	8.93784	52.4898	11.1183	21.3097	21.7713	22.1707	14.0124
1940	1712	1685	1839	1990	2218	2363	406	12	1883	0.167696	0.159961	0.239444	1.1764	-0.76285	0.113256	-0.237926	0.12171	-10045.2	0.620966	12.2516	13.3195	13.0413	11.9628	-0.619651	0.483824	1.05564	72.7651	39.3507	18.58	7.40472	0.551452	50.6923	3.40135	23.8608	11.9628	21.3735	23.9829	27.7805	11.8996	-21.5768	28.5676	12.2516	12.5782	35.6246	46.3956	28.0447	31.9542	23.2034	34.1438
1189	971	852	865	959	1084	1147	170	11	745	-0.0352369	-0.100283	-0.0503053	1.29471	-0.824923	0.0318389	-0.0285143	0.0756713	-2475.25	-0.369151	9.52808	10.4678	10.2725	9.90238	-0.305507	0.316946	1.08991	5.086	18.6447	18.55	5.53966	-0.327843	35.8684	2.65166	25.7367	9.90238	28.3537	27.2867	29.1653	9.48011	-13.5272	18.7052	9.52808	9.86142	26.3158	35.6207	18.9797	20.5492	17.0729	24.3148
1402	1040	817	635	579	603	550	271	30	381	0.263632	0.148239	0.376394	0.486448	-0.739423	0.57263	0.207898	0.263632	33.75	0.722017	8.59524	8.19321	8.44836	10.1316	0.592402	0.830408	0.786464	59.5937	32.1621	18.55	6.47127	0.641209	74.6625	3.18015	31.4881	10.1316	0.528098	34.7176	34.8667	9.34847	3.23165	39.1402	8.59524	8.33476	36.7068	-30.5374	30.7071	28.8943	34.5778	-7.27958
726	485	311	283	230	246	201	54	9	79	-0.214844	-0.413994	-0.306541	0.61194	-0.88866	0.435714	0.595395	0.196901	1180.5	-0.674263	6.56541	5.85777	6.26583	7.85683	0.841269	0.758113	0.848991	15.0495	19.1627	18.51	3.77976	-0.598927	37.7231	2.676	19.5207	7.85683	13.0758	15.914	18.0228	6.77517	10.5687	34.9683	6.56541	6.12693	28.3153	14.3656	26.2248	23.3139	26.9813	19.8365
897	741	510	477	383	377	337	88	11	181	-0.214286	-0.383754	-0.305844	0.863636	-0.881242	0.291585	0.444444	0.0921228	1243.75	-0.673752	7.81339	6.95894	7.22405	9.04911	0.763143	0.663114	0.952307	21.6529	19.9874	18.43	4.44796	-0.598408	28.8793	2.71385	20.3174	9.04911	47.7329	21.9715	21.9318	7.98957	10.7542	46.4731	7.81339	7.26217	41.2303	17.5211	23.7675	22.0068	25.6053	20.6989
887	617	423	402	372	368	371	103	10	186	-0.0860077	-0.268243	-0.122752	0.859551	-0.833063	0.313653	0.336945	0.190043	643.5	-0.496984	7.38032	7.18552	7.1661	8.51324	0.695856	0.679438	0.950803	2.21075	18.6576	18.37	4.68755	-0.441414	38.5732	2.65227	19.5565	8.51324	9.44672	15.1854	17.5019	7.50666	8.63342	36.9302	7.38032	7.19197	26.7296	22.9626	23.0887	22.002	25.1629	23.5764
2516	2546	2790	2611	2544	2691	2698	516	14	2015	-0.0697853	-0.0241352	-0.0996452	1.07585	-0.797329	0.0925467	-0.0124127	-0.0606349	-6403.75	-0.463609	13.7701	13.9213	13.9093	13.6548	-0.231538	0.452328	1.02467	5.91321	18.6544	18.31	8.02078	-0.411707	16.4807	2.65212	27.1399	13.6548	29.2311	29.2624	26.0187	14.0778	-18.57	32.385	13.7701	13.6512	48.6259	18.0561	20.0827	21.2969	19.3528	16.1719
1807	1732	1927	2217	2729	2994	3271	690	13	2312	0.0965776	0.149103	0.137899	1.3168	-0.601617	0.0058052	-0.280133	0.0365	-12334.8	0.516639	13.0393	14.8443	14.4129	12.0093	-0.654317	0.179724	1.09607	81.7718	45.1453	18.31	8.83656	0.458802	26.6357	3.56072	23.8056	12.0093	37.2971	25.2909	24.8594	12.444	-23.1052	30.4211	13.0393	13.9744	26.2722	54.6947	30.9193	36.69	18.798	34.4428
973	826	577	546	418	424	340	67	10	80	-0.250271	-0.409556	-0.357221	0.462428	-0.918886	0.624413	0.675456	0.0667206	2357.5	-0.709544	8.1733	6.97953	7.51257	9.38268	0.877403	0.85472	0.7733	37.8774	23.6434	18.29	4.06155	-0.630188	30.9541	2.87014	24.1358	9.38268	48.5598	26.0904	26.8638	8.32515	13.3092	56.1867	8.1733	7.47697	48.7291	19.7409	25.8713	23.759	27.9219	23.8383
741	531	380	362	280	289	264	87	9	125	-0.212121	-0.365039	-0.302702	0.846154	-0.836158	0.327957	0.435135	0.130435	882.5	-0.671437	7.12694	6.41507	6.61149	8.09776	0.757777	0.689613	0.945837	12.3815	18.9384	18.28	4.43105	-0.596387	29.2509	2.66551	19.5538	8.09776	27.928	18.7045	18.5685	7.24316	9.59191	36.926	7.12694	6.54213	37.5708	24.3594	24.8909	22.7766	26.6527	25.5316
794	660	460	463	363	369	310	84	9	121	-0.193256	-0.359423	-0.275816	0.601286	-0.872727	0.439815	0.558442	0.091358	1481.5	-0.650938	7.73619	6.7679	7.17258	8.70659	0.823492	0.760484	0.844035	42.6004	25.1429	18.16	4.37952	-0.578155	31.4155	2.92958	25.8946	8.70659	57.296	27.7259	28.7058	7.71944	11.3999	45.9068	7.73619	7.13349	42.5069	37.4002	28.0672	25.9217	30.7061	35.5916
3353	3048	3359	4201	5091	6072	6689	1865	24	4944	0.124919	0.172414	0.178374	1.34113	-0.388123	-0.067588	-0.310329	0.0662311	-25647.5	0.562916	16.1356	18.8417	18.2436	14.499	-0.677029	-0.407339	1.10278	124.467	82.3265	18.12	12.3091	0.499891	8.52719	4.35024	27.5371	14.499	16.9321	29.1782	22.7313	14.9763	-29.4905	35.9848	16.1356	17.2029	22.9276	44.0325	56.7165	65.8203	38.5362	44.764
875	685	595	558	505	551	547	233	13	359	-0.0877514	-0.157095	-0.12526	1.0481	-0.659854	0.16317	0.134106	0.0717629	-464	-0.500346	8.23275	8.17829	8.19818	8.81516	0.511858	0.546446	1.01578	9.31205	18.7577	18.03	6.15345	-0.444377	22.8435	2.65701	24.1208	8.81516	37.2224	25.6779	24.1241	8.41083	-7.74175	15.8069	8.23275	7.96337	34.7966	17.2246	21.5402	21.658	22.8121	18.3438
2117	1868	2006	2249	2402	2567	2900	776	21	2459	0.0645838	0.0999759	0.0922165	1.41787	-0.584582	-0.0371151	-0.268168	0.0461246	-12809	0.45179	13.1018	14.2604	13.6923	12.3157	-0.644866	-0.333567	1.12343	79.1687	43.3972	18.02	9.1894	0.401213	22.4859	3.51415	23.2877	12.3157	18.6968	22.7881	20.7921	12.6118	-23.3976	30.9009	13.1018	13.3924	37.6923	48.7105	30.1292	34.7774	23.2253	35.1923
948	664	483	459	341	314	281	92	10	195	-0.0733333	-0.228492	-0.10467	0.661871	-0.861446	0.362745	0.412766	0.171171	911.5	-0.471275	7.71384	6.54991	6.79688	8.72414	0.744563	0.713182	0.871481	30.4788	21.6889	18.02	4.51436	-0.418569	42.8623	2.78877	22.2323	8.72414	7.06213	19.2057	22.3282	7.84601	9.69584	42.5319	7.71384	6.98637	46.8698	22.0185	25.6888	23.4691	27.5338	24.8713
5576	5245	5556	5562	5889	6260	6695	1786	17	3153	0.0107718	0.0395532	0.0153816	0.823146	-0.659485	0.285844	0.0576729	0.00630449	-7802	0.248695	17.7178	18.8473	18.43	17.3746	0.386359	0.658733	0.937186	49.5726	27.7154	18.01	12.1328	0.22085	20.5176	3.02627	24.2636	17.3746	33.8742	25.6596	23.3251	17.7114	-19.8336	24.9607	17.7178	18.0585	30.2897	26.6285	28.9052	28.2402	33.0451	31.7775
2028	1823	1656	1613	1548	1592	1552	1140	1019	1290	-0.0557858	-0.103511	-0.0796512	0.943957	-0.374657	0.0689282	0.131947	0.0288814	-2217.75	-0.43026	11.7277	11.5779	11.6765	12.216	0.509096	0.410014	0.980959	26.9173	20.9198	18	10.4464	-0.382098	26.4652	2.75541	25.1241	12.216	22.7286	25.9894	25.5708	11.831	-13.0408	30.2841	11.7277	11.568	46.811	22.5071	18.8817	20.7299	16.2901	16.4837
2032	2532	2906	3071	3614	3996	4279	2592	573	2615	0.000515907	0.0692887	0.000736661	1.18116	0.0236967	0.0532223	-0.151475	-0.0810007	-11534.5	0.0903142	14.5354	16.2348	15.8687	13.6298	-0.533065	0.376153	1.05707	19.2369	19.6412	17.99	13.7366	0.080203	44.5574	2.69809	27.5151	13.6298	62.1906	28.8655	31.9526	14.2703	-22.5943	32.6434	14.5354	15.346	28.4095	32.4819	22.9273	21.3253	24.6478	28.4329
795	641	415	420	349	374	308	67	8	75	-0.164095	-0.365282	-0.234188	0.516779	-0.895476	0.597855	0.612579	0.136765	1667.25	-0.616389	7.48887	6.75331	7.20483	8.62222	0.849286	0.842426	0.802481	41.5907	24.8058	17.99	4.06155	-0.547476	38.3653	2.91643	25.5202	8.62222	50.2675	27.5515	29.8679	7.45904	11.8577	44.8543	7.48887	7.04058	35.5442	39.5089	28.0579	25.8248	30.5605	36.51
837	633	445	403	360	357	304	56	8	116	-0.186667	-0.34968	-0.266408	0.6	-0.911532	0.448931	0.551471	0.124016	1404.75	-0.643451	7.38644	6.72395	7.09397	8.5862	0.820051	0.765702	0.843433	19.6276	19.6937	17.97	3.82586	-0.571508	39.6156	2.70049	19.9156	8.5862	32.2263	19.8272	22.339	7.63461	11.1995	44.6327	7.38644	7.11379	29.2726	10.2137	23.9328	22.4662	26.0743	16.491
755	536	364	314	264	264	229	70	10	102	-0.242321	-0.414248	-0.345782	0.693694	-0.869403	0.37037	0.553623	0.146041	1192	-0.701887	6.79688	6.11803	6.41507	8.1231	0.821116	0.718145	0.88523	2.00362	18.6613	17.94	4.12129	-0.623443	30.7828	2.65245	19.0113	8.1231	24.5004	17.3652	17.623	7.14004	10.6029	38.5702	6.79688	6.41507	28.301	-0.336104	25.0436	22.5782	26.3206	9.57283
1041	773	542	507	474	525	473	112	11	230	-0.0818363	-0.253852	-0.116812	0.852174	-0.85511	0.333333	0.327039	0.161315	776.5	-0.488836	7.97387	7.79149	8.06714	9.17754	0.688969	0.693361	0.948075	27.1355	20.9637	17.92	4.82028	-0.434159	37.3649	2.75733	21.583	9.17754	14.9021	19.5562	21.5945	8.15329	9.19138	43.8008	7.97387	7.79697	30.4187	17.1534	23.1756	22.3873	25.3462	20.2734
692	473	300	264	230	254	202	43	7	58	-0.212121	-0.416168	-0.302647	0.482051	-0.909091	0.541502	0.66843	0.193006	1307.75	-0.671396	6.41507	5.86746	6.33303	7.79149	0.87435	0.81508	0.784087	9.45539	18.7643	17.74	3.5034	-0.596387	42.1776	2.65732	19.0229	7.79149	21.703	16.8685	19.9335	6.69433	10.9356	35.1327	6.41507	6.12693	22.3642	6.41797	25.9297	23.1856	26.9461	14.6905
1126	960	870	1315	1779	2373	2650	1109	34	1673	-0.0519952	-0.100917	-0.0742299	2.46939	0.155208	-0.361823	-0.337017	0.0465753	-8700.75	-0.420268	10.9557	13.8383	13.3383	9.86485	-0.695906	-0.712578	1.35165	26.4736	20.8318	17.61	10.3509	-0.37324	25.5226	2.75154	26.3832	9.86485	40.5494	28.5391	28.096	9.5464	-20.5677	17.3661	10.9557	12.1169	19.3348	145.212	18.9152	21.5588	14.1225	46.3713
883	687	448	465	502	531	484	125	8	150	-0.122807	-0.324976	-0.175274	0.942857	-0.818049	0.4	0.351032	0.15829	928	-0.559637	7.74731	7.85142	8.09776	8.82373	0.705422	0.736806	0.980578	34.2649	22.6289	17.54	5	-0.497059	30.4037	2.82849	23.1881	8.82373	35.2389	24.3758	24.9075	7.65172	9.754	41.01	7.74731	7.94757	19.094	45.7313	23.9588	23.9273	26.2302	36.1248
756	552	394	369	310	323	293	152	7	264	-0.155425	-0.314286	-0.221808	1.44097	-0.724638	0.0434783	0.141675	0.139738	-250	-0.60533	7.17258	6.64185	6.86121	8.20313	0.521312	0.351634	1.1295	30.8781	21.7821	17.48	5.3368	-0.537659	24.0114	2.79276	24.2246	8.20313	30.8979	25.4005	24.1887	7.33104	-6.29961	8.29749	7.17258	6.7679	31.8587	19.7203	26.3734	24.4104	28.7686	24.4879
830	567	404	359	324	345	304	78	24	157	-0.16932	-0.327869	-0.241639	0.829268	-0.862434	0.292793	0.408696	0.160519	812.5	-0.622858	7.10719	6.72395	7.01358	8.27677	0.742107	0.664029	0.939503	13.1302	18.995	17.38	4.27266	-0.553226	34.9284	2.66817	19.6753	8.27677	9.42046	15.3774	16.7611	7.39254	9.33128	37.6365	7.10719	6.86829	26.2403	6.17124	24.0801	22.529	26.2029	13.9379
861	819	668	621	636	628	530	83	5	218	-0.159722	-0.257099	-0.227999	0.983471	-0.898657	0.378917	0.264865	0.00335696	651.5	-0.61091	8.5316	8.09267	8.56354	9.3561	0.642207	0.723627	0.99446	49.9889	27.8825	17.29	4.36207	-0.542569	34.6472	3.03234	28.6407	9.3561	81.8836	27.1319	28.7701	8.74162	8.66905	47.0282	8.5316	8.59975	27.2114	14.2989	26.3634	26.845	29.155	21.5039
796	567	363	346	374	381	332	78	6	83	-0.034188	-0.251656	-0.0487908	0.460177	-0.862434	0.606635	0.568465	0.219774	1331	-0.365409	7.02035	6.92436	7.2495	8.27677	0.828389	0.84653	0.772043	23.8478	20.3465	17.27	4.27266	-0.324557	54.6198	2.73	20.6425	8.27677	21.7561	19.2664	23.7197	7.13349	11	39.556	7.02035	7.20483	14.3412	24.8421	24.149	23.3356	26.6481	25.8018
1477	1498	1634	1895	2138	2363	2629	891	13	2135	0.0710631	0.114134	0.101466	1.53822	-0.405207	-0.0624533	-0.318471	0.0140293	-11942.2	0.466416	12.3747	13.8016	13.3195	11.4421	-0.682899	-0.396751	1.15435	91.3146	52.0637	17.22	9.6226	0.414204	18.8044	3.73403	25.7241	11.4421	58.1541	27.5308	24.8526	11.7783	-22.8575	28.4198	12.3747	12.8826	32.1446	60.2261	37.458	43.9869	24.7549	41.0271
865	667	479	448	432	473	402	78	16	149	-0.11655	-0.275335	-0.166351	0.51715	-0.883058	0.435606	0.545771	0.129882	1379.5	-0.549973	7.65172	7.38032	7.79149	8.73726	0.817216	0.75805	0.802674	32.0625	22.0667	17.19	4.27266	-0.48847	40.5047	2.80487	22.4658	8.73726	34.5265	23.3949	26.0451	7.82429	11.132	46.0877	7.65172	7.55953	25.8897	17.9485	24.481	23.6932	27.0967	22.1222
1949	1804	1619	1678	1525	1581	1532	1108	1010	1266	-0.0445161	-0.0983257	-0.0635603	0.916948	-0.385809	0.0782672	0.14105	0.0287942	-2067.75	-0.399082	11.8831	11.528	11.6496	12.1734	0.520544	0.427753	0.971512	49.7264	27.777	17.12	10.3478	-0.35441	25.2278	3.02851	25.3194	12.1734	28.5642	26.7238	26.0159	11.7422	-12.7399	30.1705	11.8831	11.5104	53.7176	35.7765	21.6942	23.7514	19.8317	26.4782
721	457	262	236	266	263	242	56	7	60	-0.0939457	-0.356083	-0.134035	0.460829	-0.877462	0.566787	0.640934	0.283174	1208.75	-0.511767	6.17975	6.23168	6.40696	7.70262	0.862193	0.827574	0.772408	14.5862	19.1193	17.12	3.82586	-0.454596	50.5467	2.67397	19.4559	7.70262	1.35936	13.0878	17.7528	6.39883	10.6524	31.3831	6.17975	6.43123	6.1998	13.4159	25.3214	23.5611	27.6341	19.7561
753	582	420	390	319	320	254	63	7	131	-0.242604	-0.389021	-0.346219	0.84375	-0.891753	0.322997	0.458647	0.0914008	1039.75	-0.702183	7.30614	6.33303	6.8399	8.34913	0.771186	0.686119	0.944941	42.779	25.2035	17.09	3.97906	-0.623686	32.6313	2.93193	25.9132	8.34913	44.2783	28.0105	29.2734	7.48887	10.1308	40.5384	7.30614	6.83277	35.0779	17.0471	29.0459	26.6641	31.5812	25.0981
1723	1519	1312	1295	1238	1244	1189	1052	1009	1064	-0.048761	-0.121447	-0.0696188	0.92605	-0.307439	0.0559006	0.1591	0.0521943	-1555.5	-0.411379	10.8999	10.594	10.7549	11.4953	0.541863	0.38236	0.974716	33.5104	22.4315	17.06	10.1704	-0.365335	24.02	2.82024	24.8485	11.4953	25.6371	25.8436	24.681	10.9474	-11.5866	27.8346	10.8999	10.7376	44.43	26.1565	19.6953	21.3105	17.9968	19.893
1607	1472	1712	1788	1963	2127	2261	584	11	1975	0.0373911	0.112451	0.053388	1.55664	-0.603261	-0.0340314	-0.322284	0.00407213	-11492.5	0.376543	12.1373	13.125	12.8604	11.3755	-0.685614	-0.324061	1.15894	88.5475	49.975	16.98	8.35868	0.334392	30.3699	3.68342	25.3942	11.3755	35.4746	27.1947	27.8971	11.9628	-22.5669	28.9459	12.1373	12.521	34.1739	36.8771	36.3434	42.1809	26.9263	32.4329
2112	1976	1842	1820	1862	2018	2286	1234	1008	2011	-0.0176796	-0.0527437	-0.0252434	1.15804	-0.375506	-0.0614938	-0.02057	0.0271983	-6306.75	-0.293348	12.2093	13.1732	12.6369	12.5486	-0.273996	-0.394709	1.05013	27.4611	21.03	16.96	10.726	-0.26051	26.5637	2.76024	25.9553	12.5486	27.0276	27.5102	27.2568	12.2583	-18.4757	29.6079	12.2093	12.3025	41.0368	25.1737	19.0065	20.8511	16.4788	18.1755
2744	2652	2856	3120	3462	3764	4041	1148	19	3394	0.105403	0.141886	0.150506	1.25446	-0.567119	0.0195002	-0.250742	0.0468085	-17315.8	0.531926	14.6123	15.9281	15.5555	13.8418	-0.630583	0.269162	1.0785	70.7844	38.1722	16.87	10.4708	0.472373	12.7203	3.36705	21.4145	13.8418	22.5147	20.5199	14.2913	14.1879	-25.871	33.8323	14.6123	15.1278	33.3909	36.767	26.6179	29.6377	24.2636	30.3457
820	587	436	409	363	380	357	86	10	227	-0.162667	-0.302997	-0.232156	1.09554	-0.853492	0.160813	0.26101	0.130608	269.25	-0.614601	7.42291	7.09397	7.24316	8.37297	0.639076	0.543802	1.03088	19.0307	19.614	16.69	4.414	-0.545883	33.688	2.69684	20.913	8.37297	20.9644	19.5389	20.694	7.58279	6.45731	32.4731	7.42291	7.13349	30.0404	19.3877	23.8319	22.7378	26.1491	22.2453
2553	2460	2474	2287	2455	2594	2889	629	17	2454	0.0699248	0.0727478	0.0998446	1.15777	-0.744309	0.0739623	-0.145091	0.0435875	-10800	0.463918	13.1751	14.2424	13.7401	13.4993	-0.525469	0.419762	1.05004	7.75957	18.6979	16.52	8.56808	0.411981	29.2105	2.65418	28.0919	13.4993	24.2048	30.4197	31.0829	13.5249	-22.1042	32.1091	13.1751	13.4902	37.2236	14.9305	19.8658	21.1328	18.9478	13.9278
4045	3951	4331	4352	4561	4830	5145	1933	24	4196	0.0383035	0.0840385	0.0546949	1.14157	-0.510757	0.0541028	-0.149316	0.00339412	-18256	0.379591	16.3266	17.2635	16.9037	15.8089	-0.530521	0.378216	1.04512	31.4571	21.9197	16.5	12.4569	0.33709	16.8238	2.79863	26.5003	15.8089	19.2064	27.7504	24.393	16.3003	-26.3311	31.5969	16.3266	16.5839	36.4201	25.9961	25.4344	24.5441	28.3516	27.7717
2509	2353	2526	3042	3355	3849	4321	1945	1017	3892	-0.064027	-0.0286339	-0.0914223	1.90819	-0.173396	-0.273144	-0.286213	-0.032812	-18806.5	-0.450489	14.4895	16.2878	15.6717	13.3007	-0.659016	-0.648829	1.24034	37.0195	23.392	16.45	12.4826	-0.400056	53.5078	2.85993	25.5119	13.3007	21.9584	26.4937	30.2078	13.619	-26.5931	33.8941	14.4895	14.9703	34.1256	54.1662	21.8569	21.8629	23.3281	37.5863
853	670	629	640	580	599	474	272	12	142	-0.132313	-0.163194	-0.188871	0.624481	-0.59403	0.544872	0.380021	0.0296953	965	-0.573748	8.61774	7.79697	8.42964	8.75034	0.724329	0.816767	0.854751	72.599	39.2506	16.39	6.47922	-0.509567	17.3441	3.39846	41.8235	8.75034	39.6236	47.4305	47.5762	8.56808	9.88195	48.7816	8.61774	8.33955	37.3749	38.2281	37.4456	38.399	44.0646	46.3735
1261	894	662	665	817	906	929	495	9	534	0.249007	0.103759	0.355496	0.702089	-0.446309	0.346789	0.0725855	0.281606	-1259.75	0.7084	8.72852	9.7575	9.6763	9.63339	0.417141	0.702568	0.888786	69.8967	37.6552	16.28	7.91046	0.629126	43.6158	3.35178	29.2447	9.63339	-4.76174	30.0276	33.0045	8.71537	-10.8001	15.299	8.72852	9.34847	16.6431	34.5036	32.8067	34.6323	36.288	38.4635
709	490	325	299	259	251	207	61	8	82	-0.228733	-0.412104	-0.326367	0.627451	-0.87551	0.426573	0.585761	0.168266	1171.5	-0.688497	6.68688	5.91548	6.30799	7.88374	0.836707	0.752774	0.856104	16.019	19.2598	16.24	3.9365	-0.611566	34.3179	2.68051	19.6249	7.88374	22.5742	17.9106	19.1835	6.87534	10.5418	35.8795	6.68688	6.37431	25.2768	16.73	25.5819	23.3266	27.3435	21.5767
2086	2026	1785	1783	1678	1725	1690	1112	1015	1376	-0.0496913	-0.112576	-0.0709502	0.914604	-0.451135	0.0802139	0.156393	0.0181518	-1996	-0.413985	12.126	11.9114	11.9931	12.6536	0.538773	0.431271	0.970684	35.2434	22.8923	16.16	10.3602	-0.367643	25.518	2.83942	24.924	12.6536	32.5487	26.4403	25.7897	12.1305	-12.5908	31.4822	12.126	11.8831	50.2066	27.4448	19.4176	21.4588	16.5799	19.5401
1841	1652	1451	1445	1520	1576	1563	1096	1009	1176	0.0199257	-0.0449083	0.0284498	0.866225	-0.336562	0.124348	0.116216	0.0718055	-2235.5	0.305276	11.3055	11.6052	11.6373	11.8214	0.488003	0.49913	0.953258	40.4968	24.4508	16.15	10.3103	0.271105	16.377	2.90245	24.9517	11.8214	25.957	26.0169	22.2214	11.3211	-13.0755	28.4243	11.3055	11.4978	36.3711	27.7313	20.0997	22.135	17.582	20.4625
755	539	357	326	320	309	308	37	7	91	-0.138756	-0.332509	-0.198008	0.6	-0.931354	0.495845	0.537803	0.178838	1190.25	-0.582856	6.88239	6.75331	6.76061	8.13822	0.813219	0.791496	0.843433	17.1163	19.3796	16.09	3.33222	-0.517707	52.9417	2.68606	19.7319	8.13822	25.7901	18.6094	23.0176	7.09397	10.5977	38.1228	6.88239	6.8399	19.0042	14.071	24.4099	22.9708	26.7224	19.4498
1798	1584	1407	1384	1352	1342	1307	1083	1008	1180	-0.0399113	-0.0988554	-0.0569843	0.963818	-0.316288	0.0480032	0.117066	0.0478768	-2241.75	-0.384815	11.1441	10.9335	11.0302	11.657	0.48919	0.363432	0.987791	29.2447	21.4097	16.06	10.2693	-0.341742	24.4584	2.77675	25.0689	11.657	23.8284	26.0061	24.9954	11.2055	-13.0877	27.953	11.1441	11.0575	43.0747	25.0875	19.1426	20.8704	16.951	18.4861
2947	2763	2680	2940	3095	3348	3698	1917	1015	3440	0.15763	0.142724	0.225081	1.16753	-0.306189	0.0341148	-0.217613	0.105922	-16528.8	0.608293	14.3257	15.464	14.9599	14.0322	-0.60149	0.324326	1.05299	38.6973	23.8896	16.06	12.4225	0.54019	6.7854	2.88007	25.1785	14.0322	18.9368	25.7064	17.7115	13.8903	-25.473	33.519	14.3257	14.5732	39.1864	38.7316	21.3065	22.4918	21.1364	28.9546
1105	861	685	696	688	839	903	156	30	496	-0.042618	-0.155705	-0.0608386	1.062	-0.818815	0.118222	0.126226	0.117268	-749.25	-0.393302	8.8621	9.66561	9.43164	9.51337	0.50163	0.490795	1.02025	10.2256	18.8028	16.04	5.38321	-0.349299	36.3437	2.65914	24.4844	9.51337	22.2303	24.9996	26.9081	8.81516	-9.08257	17.4995	8.8621	8.82801	31.7582	37.2884	20.1559	20.9283	20.1705	27.5031
3190	2878	2932	2972	3007	3219	3416	584	41	3045	0.101991	0.11118	0.145633	1.28488	-0.797081	0.0832455	-0.232636	0.0730319	-16253.2	0.526123	14.3775	15.0605	14.7652	14.2243	-0.615024	0.436637	1.08715	55.8329	30.3897	16.04	8.35868	0.467219	32.8372	3.12063	22.6516	14.2243	16.1748	21.4457	22.4518	14.3127	-25.3307	33.5861	14.3775	14.4337	43.8837	27.6084	22.7675	25.1308	20.5813	22.6826
786	535	392	412	442	534	501	156	9	264	-0.0302234	-0.183628	-0.0431347	1.3252	-0.708411	0.165877	0.0449219	0.191336	-634.25	-0.350705	7.44102	7.94229	8.11298	8.11804	0.355483	0.54945	1.0984	42.7022	25.1774	16.02	5.38321	-0.311493	38.9054	2.93092	25.1593	8.11804	12.0958	24.8929	27.272	7.31861	-8.59185	5.72475	7.44102	7.61741	17.5626	49.8636	26.7137	27.1262	29.7012	40.5695
2216	2040	2001	1863	1808	1888	1860	1152	1008	1581	-0.0584501	-0.0680628	-0.0834574	0.969101	-0.435294	0.0592086	0.0836653	-0.000750188	-3532.75	-0.437007	12.3047	12.2981	12.3595	12.6827	0.43737	0.389758	0.989592	15.8243	19.2396	15.97	10.483	-0.388086	26.8856	2.67957	25.9857	12.6827	23.2363	27.2946	27.1101	12.6013	-15.2302	31.3275	12.3047	12.1824	47.023	14.1257	18.726	20.5313	16.1694	11.2738
879	605	453	406	350	353	321	68	12	197	-0.184314	-0.31952	-0.263053	1.01282	-0.887603	0.225933	0.313789	0.135908	536.25	-0.640739	7.40472	6.84702	7.06738	8.45769	0.679536	0.60906	1.00426	15.8021	19.2374	15.94	4.08166	-0.569096	36.1473	2.67947	20.2012	8.45769	7.57477	15.8546	17.5686	7.68009	8.12436	37.2191	7.40472	7.0473	32.0229	7.43201	23.7953	22.3952	25.9393	14.5671
777	596	463	450	306	296	248	63	9	107	-0.286111	-0.397421	-0.408324	0.505837	-0.894295	0.412088	0.641873	0.055102	1505.5	-0.741882	7.66309	6.28276	6.66444	8.41554	0.862614	0.744155	0.796777	32.4633	22.1659	15.94	3.97906	-0.658939	29.4245	2.80906	22.541	8.41554	40.3956	23.9521	24.1977	7.73619	11.4611	46.2159	7.66309	6.73866	54.1209	28.1646	26.7632	24.2959	28.5161	29.0966
1323	1219	1170	1111	1075	1141	1125	228	10	755	-0.094993	-0.115279	-0.135623	1.03516	-0.812961	0.123113	0.0981982	-0.0107991	-1446	-0.51378	10.3571	10.4004	10.4495	10.6824	0.461354	0.497471	1.01159	30.255	21.6373	15.93	6.10911	-0.456279	22.521	2.78655	24.8206	10.6824	47.0337	26.8102	25.2828	10.5373	-11.3081	26.1128	10.3571	10.244	41.0234	17.433	19.7538	21.3194	18.1883	14.8927
793	585	406	373	313	328	289	62	8	103	-0.199409	-0.366822	-0.284576	0.564576	-0.894017	0.449198	0.585366	0.134328	1377	-0.657758	7.1984	6.61149	6.89643	8.36345	0.836519	0.765854	0.826496	9.36804	18.7603	15.79	3.95789	-0.584227	36.5198	2.65713	18.9669	8.36345	30.0679	18.2465	20.0778	7.40472	11.1253	42.39	7.1984	6.78966	32.1785	14.5784	24.1241	22.2694	25.973	19.1786
800	625	497	496	389	402	326	68	8	125	-0.218137	-0.324153	-0.311337	0.532915	-0.8912	0.436937	0.572327	0.0591576	1396.5	-0.677761	7.91578	6.88239	7.38032	8.54988	0.830261	0.758821	0.810748	54.473	29.7794	15.73	4.08166	-0.601972	33.2125	3.0996	31.2402	8.54988	42.637	34.2165	35.9347	7.9211	11.1776	47.0256	7.91578	7.29989	44.1695	34.6454	31.7271	30.0386	36.0566	38.355
1821	1657	1476	1432	1405	1419	1357	1077	1006	1133	-0.044586	-0.102095	-0.0636591	0.868889	-0.35003	0.0873943	0.171025	0.0357668	-1517.25	-0.399289	11.2715	11.0712	11.2373	11.8333	0.555077	0.443773	0.954234	30.3342	21.6555	15.73	10.2503	-0.354595	24.4827	2.78734	24.8431	11.8333	28.6642	26.0746	25.0784	11.3858	-11.4909	29.719	11.2715	11.2002	43.042	21.8744	19.1693	20.9451	16.8771	16.5598
730	453	281	265	272	271	229	53	8	48	-0.124	-0.348214	-0.176921	0.447489	-0.883002	0.640449	0.644283	0.256122	1233.25	-0.561383	6.42316	6.11803	6.47127	7.68009	0.863692	0.861976	0.764881	10.9659	18.8448	15.69	3.75629	-0.498663	47.558	2.66111	19.1613	7.68009	-4.40307	11.0191	15.3811	6.54991	10.7238	33.1204	6.42316	6.47922	12.8436	24.1207	24.9961	23.4313	27.394	25.9711
2261	2101	1942	1865	1783	1799	1782	1143	1008	1505	-0.0474649	-0.0866305	-0.0677721	0.951869	-0.455973	0.0797921	0.111052	0.0180761	-2900.25	-0.407709	12.3091	12.1237	12.1622	12.8078	0.480665	0.430513	0.983692	21.3274	19.9378	15.67	10.4556	-0.362069	26.2231	2.7116	25.5471	12.8078	23.8193	26.7	26.277	12.4762	-14.2608	31.4664	12.3091	12.126	48.7935	19.7	18.7762	20.7215	15.8975	14.5115
790	540	340	309	312	323	292	58	10	118	0.0271817	-0.201335	0.0387917	0.534819	-0.892593	0.505241	0.47541	0.256424	977.75	0.338516	6.76061	6.63429	6.86121	8.14325	0.78047	0.796464	0.811713	41.2763	24.7027	15.59	3.87088	0.300671	119.847	2.91238	25.3667	8.14325	12.7402	25.3108	9.52256	6.97953	9.92528	35.2906	6.76061	6.78242	16.3807	13.2814	28.764	26.6948	31.7157	22.8924
2223	2189	2273	2123	2035	2215	2217	452	25	1613	-0.0518279	-0.0330345	-0.0740029	0.971694	-0.793513	0.119061	0.0473684	-0.0310728	-4156	-0.419839	12.8524	13.0393	13.0354	12.9842	0.361823	0.491952	0.990474	28.6338	21.2765	15.59	7.67443	-0.372839	18.0906	2.77098	25.5136	12.9842	31.5415	27.1651	24.1806	13.1482	-16.0777	32.062	12.8524	12.6723	49.5986	15.6357	19.2069	21.1058	16.6348	12.5824
6788	6818	7560	7609	7898	8340	8761	3369	1027	6884	0.0454545	0.096834	0.0649073	1.01413	-0.505867	0.0920601	-0.103779	-0.00172254	-27317	0.401881	19.6687	20.6151	20.2794	18.9621	-0.469934	0.451534	1.00469	37.9064	23.652	15.58	14.9911	0.356883	40.6013	2.87049	25.453	18.9621	33.4309	27.1801	29.8302	19.6264	-30.117	18.5924	19.6687	19.9146	23.1093	27.0938	36.6235	32.4007	36.0213	34.3633
850	658	528	499	440	440	393	124	11	213	-0.175947	-0.280156	-0.251132	0.886486	-0.81155	0.269297	0.334686	0.0720562	641.75	-0.63091	7.93171	7.32483	7.6059	8.69778	0.694298	0.645769	0.960633	29.3484	21.4327	15.57	4.98663	-0.560351	25.8531	2.77774	22.1187	8.69778	36.5446	23.1357	22.2796	8.08248	8.62559	41.8259	7.93171	7.6059	34.6153	19.9843	23.9246	23.3467	26.3558	22.7609
926	845	645	571	448	463	428	104	13	248	-0.223909	-0.347687	-0.319612	0.94621	-0.876923	0.245053	0.371753	0.0171429	1047.75	-0.683714	8.29619	7.53612	7.73619	9.45407	0.719038	0.625778	0.981739	9.51433	18.7671	15.53	4.70267	-0.607235	25.2674	2.65745	19.2381	9.45407	67.6804	21.9938	20.8491	8.64012	10.1567	50.0267	8.29619	7.65172	47.6126	2.02061	22.1551	20.9674	23.8824	9.2797
910	763	612	586	396	425	339	74	7	115	-0.27633	-0.374775	-0.394423	0.481268	-0.903014	0.502165	0.64086	0.0133011	1981	-0.733366	8.36821	6.97268	7.51847	9.1378	0.86216	0.794844	0.783662	48.7855	27.4036	15.53	4.19834	-0.651342	27.3668	3.01487	28.6592	9.1378	50.1215	30.8411	31.1016	8.49018	12.5592	55.3484	8.36821	7.34342	62.8002	22.4442	29.406	26.8639	31.7499	28.4103
795	652	473	681	1366	1527	1947	249	9	393	0.406152	0.264108	0.579829	0.688393	-0.618098	0.480502	-0.0836261	0.338693	-1836.75	0.833873	8.79797	12.4869	11.5154	8.67127	-0.437301	0.783247	0.882969	20.5877	19.8285	15.42	6.29119	0.740564	84.3384	2.70663	25.1395	8.67127	54.147	27.1026	26.6176	7.79149	-12.2466	6.91963	8.79797	11.0956	9.37034	137.789	18.6828	22.4213	9.79135	43.9396
1093	866	765	740	720	747	760	207	63	494	-0.0797459	-0.140975	-0.113843	0.983129	-0.76097	0.137871	0.149303	0.0656489	-621.5	-0.484658	9.04504	9.12581	9.07347	9.53175	0.530505	0.516604	0.994344	17.0933	19.377	15.4	5.91548	-0.43043	25.5902	2.68593	24.3276	9.53175	26.4778	25.1785	24.4291	9.14577	-8.53389	20.335	9.04504	8.96281	34.0623	23.7852	20.2208	21.1692	19.9984	20.0684
1080	1166	1154	1125	769	848	682	90	5	211	-0.261202	-0.266015	-0.37291	0.482249	-0.922813	0.524239	0.563003	-0.135827	2610.75	-0.719782	10.4004	8.80227	9.46525	10.5253	0.825728	0.806324	0.784194	82.6548	45.7518	15.4	4.4814	-0.639233	25.107	3.57659	52.4802	10.5253	92.001	35.2824	35.452	10.489	13.7696	71.4316	10.4004	9.16169	82.3935	23.7573	41.1312	40.1201	49.0705	42.8994
2129	1925	1949	2109	2184	2348	2555	752	14	2113	0.0511198	0.0572968	0.0729914	1.30245	-0.609351	0.0107678	-0.187249	0.0476423	-9898.5	0.417918	12.8241	13.6709	13.2913	12.4397	-0.572102	0.220822	1.09208	57.7196	31.2633	15.38	9.09367	0.371133	23.2018	3.15025	23.564	12.4397	22.0231	23.6178	21.9552	12.4912	-21.4712	30.2099	12.8241	12.9743	40.6511	42.4034	22.813	25.709	19.0534	29.1726
1073	951	842	789	778	873	911	308	69	582	-0.108624	-0.168305	-0.155072	1.13146	-0.67613	0.0754567	0.107746	0.0192196	-1029.75	-0.537251	9.24043	9.69407	9.55736	9.83392	0.475847	0.422571	1.04203	2.79546	18.6491	15.38	6.75331	-0.477136	17.5307	2.65187	24.7781	9.83392	51.7259	26.7734	23.5271	9.44287	-10.0982	20.8629	9.24043	9.19729	34.0162	15.2159	19.6249	20.6004	19.116	14.2365
1977	1775	1637	1563	1479	1512	1483	1089	1012	1263	-0.0420115	-0.0823171	-0.0599842	0.93887	-0.386479	0.0874277	0.113551	0.0307874	-2401.5	-0.391452	11.6052	11.4037	11.4776	12.1078	0.484243	0.44383	0.979194	19.959	19.7393	15.34	10.2883	-0.347634	24.6766	2.70257	25.4078	12.1078	23.4094	26.4637	25.5661	11.7855	-13.3914	29.9313	11.6052	11.3935	48.0226	18.3591	18.6261	20.3909	16.1221	13.8699
1516	1417	1426	1412	1462	1542	1617	317	22	1110	-0.052787	-0.0496296	-0.0753679	1.09587	-0.776288	0.0722942	0.00389656	-0.00937887	-3329.25	-0.422405	11.2188	11.7373	11.553	11.232	0.15736	0.416583	1.03099	16.2831	19.2876	15.22	6.81846	-0.375125	21.729	2.6818	25.8955	11.232	42.0971	27.9765	26.3368	11.2557	-14.9319	27.2163	11.2188	11.3496	37.5967	26.5251	18.5429	20.2151	16.2177	18.7465
1006	836	689	604	543	579	571	102	9	362	-0.146423	-0.239437	-0.209017	0.945419	-0.87799	0.172571	0.265708	0.048671	280.25	-0.593463	8.45303	8.29619	8.33476	9.42039	0.642887	0.556745	0.981465	0.981683	18.6853	15.15	4.67233	-0.527071	31.97	2.65359	20.1602	9.42039	41.7883	21.2681	22.0423	8.83228	6.54408	42.6625	8.45303	8.15831	36.9113	-0.762824	21.1507	20.9632	22.4767	6.21699
1874	1649	1433	1439	1486	1515	1497	1189	1010	1215	0.00864753	-0.0614741	0.0123468	0.930727	-0.278957	0.0909091	0.0971391	0.0751855	-2537.75	0.231128	11.2898	11.4395	11.4852	11.8143	0.45969	0.449644	0.976354	39.911	24.265	15.14	10.594	0.205257	17.0058	2.89508	24.9478	11.8143	22.1056	25.6719	22.0638	11.2741	-13.6401	27.9182	11.2898	11.4114	38.0396	29.6652	20.062	22.0483	17.6518	21.5852
1606	1522	1494	1474	1394	1473	1431	280	12	1031	-0.0869407	-0.0961469	-0.124132	1.051	-0.816032	0.0979878	0.0714537	-0.0217131	-2337	-0.49884	11.3806	11.2689	11.378	11.5028	0.414962	0.461024	1.01672	52.1474	28.7736	15.02	6.54213	-0.443004	20.2593	3.0643	25.4011	11.5028	41.4539	27.3861	25.1884	11.4319	-13.2705	28.7392	11.3806	11.1709	47.3371	25.5362	22.5608	24.7428	20.7661	21.6599
2008	1750	1575	1541	1510	1528	1516	1145	1011	1175	-0.0402906	-0.0927256	-0.0575269	0.891259	-0.345714	0.105784	0.149425	0.0470428	-1774.5	-0.386032	11.5505	11.4877	11.5179	12.0507	0.53065	0.47294	0.962354	18.1464	19.5017	15.01	10.4617	-0.342821	25.963	2.69169	25.1637	12.0507	18.3343	25.6213	25.0237	11.6348	-12.1067	30.208	11.5505	11.4725	44.025	23.559	18.5817	20.3209	16.1186	16.9681
1761	1511	1341	1310	1330	1386	1360	1075	1009	1096	-0.0113122	-0.0708717	-0.0161512	0.900839	-0.288551	0.0893228	0.122585	0.0677789	-2021.75	-0.252776	10.9418	11.0793	11.1495	11.4751	0.49676	0.447014	0.965789	23.097	20.2189	14.97	10.244	-0.224483	22.7976	2.72429	25.1584	11.4751	20.0946	25.7922	24.2365	11.0275	-12.6447	27.4735	10.9418	10.9972	38.6149	23.6852	18.8076	20.4771	16.6037	17.4118
927	768	657	648	649	682	675	153	12	316	-0.0648298	-0.142007	-0.0925449	0.778163	-0.800781	0.292273	0.26212	0.0674237	262.75	-0.452325	8.6535	8.77205	8.80227	9.15771	0.63998	0.663636	0.919793	21.3701	19.9442	14.85	5.34848	-0.401721	33.191	2.71189	21.1896	9.15771	46.2537	22.8088	23.9576	8.69338	6.40493	41.3368	8.6535	8.65795	29.5605	29.7395	20.9454	21.8515	21.0822	24.2382
1665	1803	1779	1935	2971	3579	4016	507	12	2143	0.207572	0.201152	0.296385	0.921062	-0.718802	0.117017	-0.161395	0.103101	-9347	0.666733	12.4612	15.8951	15.2963	12.1712	-0.544457	0.489121	0.972963	28.5875	21.2666	14.72	7.97387	0.592093	41.5436	2.77055	26.2342	12.1712	60.8792	27.8476	30.6214	12.1169	-21.0648	29.1692	12.4612	14.3759	20.167	44.8507	20.9201	20.8279	22.1073	32.6143
973	787	554	596	600	687	652	197	11	162	0.0340017	-0.14058	0.0485364	0.60371	-0.749682	0.570861	0.374672	0.171279	1122.25	0.364773	8.41554	8.67127	8.82373	9.23262	0.720915	0.829552	0.845167	61.0351	32.8744	14.7	5.81865	0.323967	72.1472	3.20346	34.6245	9.23262	37.8708	38.7607	38.7054	8.21303	10.3919	47.3428	8.41554	8.43433	27.7915	54.0276	31.0609	31.2283	35.8383	46.9478
1017	1096	947	861	489	493	395	168	10	164	-0.364553	-0.426155	-0.520422	0.546485	-0.846715	0.457851	0.639491	-0.130072	2858.75	-0.804362	9.51337	7.33723	7.89979	10.3103	0.861546	0.77074	0.817572	41.3881	24.7393	14.6	5.51785	-0.714365	10.802	2.91382	25.4881	10.3103	96.2148	23.2686	16.6582	9.82012	14.1925	69.01	9.51337	7.87837	97.3799	7.3399	25.6811	23.3129	27.296	15.5787
1103	869	592	477	423	427	347	64	10	74	-0.176938	-0.354638	-0.252561	0.34058	-0.926352	0.696721	0.720792	0.123288	2605	-0.632104	7.81339	7.02711	7.53025	9.54274	0.896609	0.886516	0.69835	1.62047	18.6692	14.48	4	-0.561402	37.995	2.65283	18.1414	9.54274	24.7401	16.1679	18.3417	8.39667	13.7595	58.0377	7.81339	7.50666	33.2453	-21.0176	22.4017	20.8446	23.9924	-8.01509
790	609	385	318	280	267	225	56	6	85	-0.254072	-0.453461	-0.362562	0.484716	-0.908046	0.458599	0.691667	0.139184	1701	-0.713062	6.82562	6.0822	6.43928	8.47629	0.884366	0.77116	0.785529	11.3038	18.8655	14.44	3.82586	-0.633362	33.8324	2.66209	18.8575	8.47629	40.4224	19.5859	20.7796	7.27479	11.9372	43.396	6.82562	6.54213	25.462	-11.5777	24.8406	22.1642	25.6909	0.822481
2002	1675	1591	1712	1921	2253	2522	599	13	1860	0.13415	0.108806	0.191543	1.08253	-0.642388	0.0567951	-0.1478	0.124381	-7960	0.576442	11.9628	13.6118	13.1095	11.876	-0.528718	0.384388	1.02679	36.2445	23.1706	14.42	8.42964	0.511913	32.6491	2.85088	25.3083	11.876	11.9702	25.1209	26.2432	11.6741	-19.9666	27.7035	11.9628	12.4311	32.084	44.1278	19.5296	21.5406	16.8196	28.3192
1908	1657	1503	1474	1451	1476	1436	1150	1008	1224	-0.0241908	-0.0728391	-0.0345394	0.930168	-0.305975	0.0783133	0.108732	0.0526316	-2424	-0.325665	11.3806	11.282	11.3858	11.8333	0.477294	0.427837	0.976159	28.8949	21.3331	14.35	10.4769	-0.289212	25.2061	2.77343	25.1265	11.8333	19.3574	25.67	24.8522	11.4548	-13.4331	28.7337	11.3806	11.3211	43.0386	24.1963	19.0329	20.8302	16.63	17.7281
1215	1041	899	809	850	902	884	108	8	473	-0.0526932	-0.125405	-0.0752271	0.823239	-0.896254	0.26209	0.219684	0.0591313	-3	-0.422141	9.31786	9.59734	9.66204	10.1348	0.603392	0.639956	0.937221	14.1161	19.0771	14.32	4.7622	-0.374902	42.7597	2.67201	22.5124	10.1348	37.2228	23.6824	26.677	9.65132	-1.44225	32.6955	9.31786	9.47268	29.3485	4.91745	19.4811	20.5613	18.7382	7.2187
1156	821	645	644	707	866	996	300	9	617	-0.115917	-0.232733	-0.165468	1.2544	-0.634592	-0.0939716	0.123119	0.127494	-1104.5	-0.548999	8.63566	9.98665	9.53175	9.3637	0.497479	-0.454638	1.07848	6.81622	18.672	14.26	6.69433	-0.487583	17.3299	2.65296	24.8415	9.3637	-0.412751	22.4548	18.4985	8.64012	-10.3369	15.1162	8.63566	8.90854	22.9449	33.0721	19.992	21.0115	19.5617	24.8669
1244	1172	988	926	851	883	866	138	8	563	-0.0989989	-0.182644	-0.141337	0.895062	-0.882253	0.179898	0.235635	0.0193548	37.25	-0.520897	9.74699	9.53175	9.59372	10.5433	0.617656	0.564515	0.96372	22.2987	20.0887	14.25	5.16765	-0.462605	31.0066	2.71842	21.9296	10.5433	55.1188	23.9907	24.6545	9.95984	3.33971	43.0922	9.74699	9.4764	43.0257	14.7029	19.8812	20.7241	19.6826	14.3543
967	770	646	630	607	639	585	112	16	356	-0.0713101	-0.157895	-0.101795	0.823214	-0.854545	0.222707	0.251015	0.0833629	117	-0.466919	8.57262	8.36345	8.61325	9.16566	0.630812	0.606147	0.937212	46.7874	26.6365	14.24	4.82028	-0.414684	38.8657	2.98647	26.9485	9.16566	34.7698	29.1611	31.5758	8.64459	4.89097	37.652	8.57262	8.467	32.0742	26.8916	25.7049	26.2238	28.2072	28.1574
787	589	393	375	343	319	273	62	9	60	-0.171386	-0.358708	-0.244583	0.532374	-0.894737	0.64497	0.598372	0.150729	1529.5	-0.625377	7.21125	6.48715	6.83277	8.38247	0.842669	0.863999	0.810474	18.7231	19.5742	14.22	3.95789	-0.555467	39.1461	2.69501	19.7163	8.38247	33.8853	19.7945	22.2122	7.32483	11.5217	42.7266	7.21125	7	26.1846	24.5363	24.1349	22.7	26.3632	25.4077
775	586	445	411	339	357	313	96	12	169	-0.178808	-0.308036	-0.255193	0.787097	-0.836177	0.294363	0.412048	0.0987342	825.75	-0.634293	7.43499	6.78966	7.09397	8.36821	0.744131	0.665214	0.9233	23.0675	20.214	14.2	4.57886	-0.563372	30.1885	2.72406	20.8219	8.36821	37.2737	21.596	21.9043	7.63461	9.38173	39.9181	7.43499	6.97268	35.6285	15.2397	24.6446	23.1049	26.9536	20.3569
1388	1368	1181	1134	936	968	918	167	8	579	-0.201424	-0.270785	-0.287571	0.932484	-0.877924	0.151026	0.302857	-0.0416759	755.5	-0.660058	10.4281	9.71884	9.89217	11.101	0.671551	0.532538	0.976968	38.152	23.7252	14.18	5.50688	-0.586188	19.2878	2.87345	24.3474	11.101	56.9446	26.2902	23.6089	10.5702	9.10776	59.2853	10.4281	9.78195	58.4547	20.0535	21.3016	22.093	21.7483	19.2264
716	493	332	321	309	339	304	64	9	126	-0.112228	-0.300792	-0.160146	0.667925	-0.870183	0.355499	0.471642	0.192705	851.25	-0.543049	6.84702	6.72395	6.97268	7.89979	0.778402	0.708401	0.87413	20.8765	19.8706	14.1	4	-0.482355	45.1582	2.70855	20.4709	7.89979	21.0336	18.8926	22.3959	6.92436	9.47732	33.6199	6.84702	6.76061	19.9262	29.1497	24.9595	23.6824	27.5543	28.8888
801	635	444	389	258	289	222	68	8	95	-0.311669	-0.463134	-0.444782	0.656652	-0.892913	0.420732	0.611675	0.0759625	1608.5	-0.763336	7.29989	6.05505	6.61149	8.59524	0.848868	0.749322	0.869184	26.8551	20.9074	14.06	4.08166	-0.678002	26.4253	2.75486	21.1195	8.59524	45.8958	22.7068	21.9906	7.62888	11.7167	45.9758	7.29989	6.3661	51.9351	1.84043	26.862	23.1759	25.8638	10.7265
711	533	379	333	289	273	223	88	9	123	-0.250825	-0.402632	-0.357925	0.85022	-0.834897	0.297143	0.46832	0.106132	965	-0.71001	6.9313	6.06413	6.48715	8.10791	0.77657	0.667301	0.94735	19.1499	19.6297	14.06	4.44796	-0.630653	26.196	2.69756	20.1477	8.10791	41.1988	21.1937	20.2783	7.2368	9.88195	37.6056	6.9313	6.61149	27.3812	3.87507	25.1903	23.1718	27.1653	13.1546
934	786	627	591	548	561	529	131	11	243	-0.133816	-0.242688	-0.191015	0.772443	-0.833333	0.32687	0.359862	0.0596175	876	-0.575911	8.39194	8.08758	8.24747	9.22871	0.711287	0.68885	0.917534	16.8902	19.3541	14.05	5.07875	-0.511488	28.4681	2.68487	19.9548	9.22871	49.2501	21.7046	21.5268	8.55899	9.5683	47.9149	8.39194	8.18327	33.957	18.2213	21.4499	21.4696	22.7603	18.9095
1786	1571	1382	1381	1332	1341	1287	1078	1010	1088	-0.0394885	-0.10323	-0.0563805	0.902897	-0.313813	0.0799154	0.153451	0.0513129	-1639.25	-0.383451	11.1361	10.8774	11.0275	11.625	0.535373	0.430735	0.966524	36.2022	23.1586	14.05	10.2535	-0.340531	24.3272	2.85039	24.8792	11.625	23.825	25.7302	24.6509	11.1387	-11.7909	28.5129	11.1361	11.0028	44.3684	28.7465	19.823	21.5921	17.8326	21.2171
901	700	507	488	440	569	486	207	9	175	-0.14447	-0.297498	-0.206203	0.704485	-0.704286	0.368231	0.447777	0.115955	1156	-0.590788	7.87299	7.86222	8.28649	8.87904	0.765045	0.71676	0.889796	32.5648	22.1912	14.02	5.91548	-0.524717	20.0312	2.81013	22.6645	8.87904	33.6357	23.5706	20.796	7.97387	10.4951	45.6635	7.87299	7.6059	32.4287	25.0151	24.4567	23.5535	27.0424	26.2052
770	527	349	333	365	387	348	70	8	92	-0.0340741	-0.235639	-0.0486269	0.530675	-0.867173	0.559809	0.505714	0.221851	1081.5	-0.365	6.9313	7.03385	7.28736	8.07737	0.796713	0.824163	0.809611	20.0922	19.7579	13.97	4.12129	-0.324196	57.3006	2.70342	20.189	8.07737	14.723	17.3149	22.1279	7.04058	10.2646	36.7484	6.9313	7.14657	12.9622	25.3995	23.8952	23.302	26.3173	25.8602
964	779	655	548	504	543	528	215	14	400	-0.108291	-0.192956	-0.154584	1.05882	-0.724005	0.137001	0.165295	0.0646198	-347.75	-0.536687	8.18327	8.08248	8.15831	9.20123	0.548808	0.515515	1.01924	7.97832	18.7051	13.88	5.99073	-0.476648	22.2722	2.65452	23.9245	9.20123	38.2393	25.4911	23.7293	8.68455	-7.03216	18.6393	8.18327	7.95811	33.1628	-12.2046	21.5226	21.1904	23.0482	-1.78504
738	517	334	310	257	248	225	50	6	72	-0.218978	-0.414501	-0.312457	0.528037	-0.903288	0.496503	0.64127	0.175309	1364.5	-0.678573	6.7679	6.0822	6.28276	8.02596	0.862343	0.791846	0.808267	4.32889	18.641	13.87	3.68403	-0.602745	38.7783	2.65149	18.8545	8.02596	22.9621	16.8581	19.2111	6.93823	11.0915	37.9396	6.7679	6.35786	28.9818	18.7225	25.1866	22.721	26.5032	22.1239
5008	4911	5268	5470	5851	6225	6517	1942	18	4558	0.0378961	0.0728714	0.0541135	0.974485	-0.604561	0.109853	-0.0600057	0.00730202	-16463.2	0.378241	17.6196	18.6788	18.3956	16.9977	-0.391499	0.478928	0.991422	56.8135	30.8398	13.69	12.4762	0.335891	16.9799	3.13596	22.5147	16.9977	23.1863	22.2209	18.0905	17.4	-25.4393	27.5522	17.6196	18.0195	29.3697	23.5807	28.8864	28.2532	33.0253	30.0587
1849	1631	1459	1431	1441	1454	1412	1088	1007	1175	-0.0184991	-0.0740863	-0.0264128	0.924609	-0.332925	0.0895002	0.112931	0.0545926	-2258.75	-0.297809	11.2689	11.2188	11.3289	11.7711	0.48336	0.447309	0.97421	30.0402	21.5882	13.69	10.2851	-0.264474	23.5496	2.78444	25.0536	11.7711	22.9916	25.9096	24.6069	11.3419	-13.1207	28.4793	11.2689	11.295	40.4091	24.313	19.1176	20.9247	16.7286	17.8707
3046	3056	2915	3030	4053	4613	4835	1488	1013	2610	0.201042	0.178274	0.28707	0.825879	-0.513089	0.253432	-0.0843446	0.120531	-10525	0.659674	14.4704	16.9096	16.6467	14.5117	-0.43855	0.632831	0.938222	37.5289	23.5405	13.68	11.4165	0.585817	5.89113	2.86597	25.2523	14.5117	22.2184	26.1325	17.8006	14.285	-21.915	32.5108	14.4704	15.9438	21.91	30.5244	23.685	22.8578	26.0245	28.4502
732	475	307	256	264	256	229	69	7	109	-0.169524	-0.370851	-0.241883	0.807339	-0.854737	0.333333	0.459293	0.214834	841.75	-0.623067	6.3496	6.11803	6.3496	7.80245	0.771549	0.693361	0.931148	11.2563	18.8625	13.59	4.10157	-0.553448	37.2627	2.66195	19.5223	7.80245	5.7767	14.2847	16.2792	6.746	9.44194	31.7852	6.3496	6.41507	12.0108	-6.92764	25.1841	23.2257	27.2319	5.55498
2010	1736	1511	1525	1638	1716	1777	1104	1009	1338	-0.0206011	-0.0897677	-0.0294142	1.02	-0.364055	0.0401722	0.0799378	0.0675717	-3014	-0.308687	11.5104	12.1124	11.9722	12.0185	0.430775	0.342485	1.00662	13.6398	19.0364	13.55	10.3353	-0.274135	23.9984	2.6701	25.8574	12.0185	16.9024	26.5505	25.4562	11.4751	-14.4449	28.2877	11.5104	11.7879	34.9823	30.4874	18.5628	20.2111	16.3008	21.0098
787	562	390	370	339	363	321	69	18	152	-0.135371	-0.308498	-0.19319	0.946128	-0.877224	0.32294	0.333333	0.16309	631.75	-0.578089	7.17905	6.84702	7.13349	8.25237	0.693361	0.686079	0.98171	27.7346	21.0864	13.49	4.10157	-0.513463	40.8191	2.7627	21.796	8.25237	23.0837	21.1597	23.8853	7.30614	8.58055	34.9878	7.17905	6.97268	25.8073	23.1097	25.274	23.8532	27.8737	25.7659
2507	2368	2225	2347	2991	3548	3908	1362	1011	2533	0.153187	0.122638	0.218734	0.964686	-0.424831	0.0893403	-0.104895	0.108841	-9943.25	0.602521	13.2894	15.7514	15.252	13.3289	-0.471612	0.447043	0.988087	16.8731	19.3521	13.47	11.0847	0.535066	8.56904	2.68479	27.4618	13.3289	22.7249	29.4295	23.0544	13.055	-21.5035	31.3684	13.2894	14.4081	24.4007	35.8585	21.1452	21.016	22.4372	28.4961
1123	850	661	649	599	617	584	204	44	355	0.0134328	-0.111838	0.019176	0.904271	-0.76	0.313346	0.161202	0.153649	-202	0.267661	8.65795	8.35868	8.51324	9.47268	0.54424	0.679216	0.967014	55.7241	30.3403	13.43	5.88677	0.237715	65.5549	3.11894	27.5873	9.47268	15.0248	29.1132	31.9274	8.71098	-5.86746	20.1828	8.65795	8.42964	36.105	28.5164	28.8339	28.5913	32.9469	32.7307
1074	870	769	684	639	643	644	157	14	382	-0.125915	-0.186094	-0.17975	0.827471	-0.81954	0.219612	0.27566	0.0414459	304.25	-0.564361	8.81087	8.63566	8.63118	9.5464	0.650815	0.603326	0.938824	4.39638	18.6411	13.4	5.39469	-0.501217	25.9382	2.65149	20.0753	9.5464	32.2983	20.0464	18.9514	9.16169	6.72579	45.3723	8.81087	8.61325	36.0663	2.45684	20.3938	20.8295	20.9273	7.24796
2057	2037	2049	1892	2404	2503	2793	1400	38	2098	0.114712	0.117609	0.163793	1.04302	-0.312715	0.103035	-0.138325	0.0617058	-9030.5	0.54714	12.3682	14.0828	13.5775	12.6764	-0.51717	0.468809	1.01414	31.2609	21.8727	13.34	11.1869	0.485888	9.58213	2.79663	25.9056	12.6764	35.7477	27.8543	21.5952	12.7013	-20.8243	30.6224	12.3682	13.3961	24.2106	12.8267	19.7906	21.1342	18.6946	12.4013
1914	1718	1549	1493	1415	1433	1370	1095	1008	1181	-0.0682759	-0.119583	-0.0974835	0.935603	-0.362631	0.0671406	0.152247	0.0262455	-1769.5	-0.460232	11.4293	11.1064	11.2741	11.9768	0.533969	0.406439	0.978056	29.4606	21.4576	13.31	10.3071	-0.408717	25.6516	2.77882	24.93	11.9768	24.5269	25.8657	25.1994	11.5705	-12.0953	29.9857	11.4293	11.2267	47.2658	20.371	19.0973	20.8736	16.7724	15.5854
1412	1439	1463	1407	1046	1115	790	95	12	202	-0.240356	-0.232548	-0.343166	0.342634	-0.933982	0.632058	0.648339	-0.118074	3748.5	-0.700113	11.2055	9.24434	10.3695	11.2898	0.865501	0.858194	0.699751	126.541	84.5413	13.23	4.5629	-0.621754	25.6332	4.38891	104.927	11.2898	61.9288	101.595	112.782	11.3522	15.5341	80.5189	11.2055	10.151	77.2446	19.9585	78.1329	77.0332	96.6997	80.6451
3418	3285	3023	2974	3020	3016	2804	738	14	2076	0.116857	0.0756894	0.166861	0.76406	-0.775342	0.296152	0.0586529	0.0899375	-5208.75	0.550535	14.3807	14.1013	14.4481	14.8655	0.388535	0.666558	0.914203	132.013	90.5661	13.22	9.03689	0.488897	24.5979	4.49078	52.9191	14.8655	18.9436	68.8467	73.7393	14.4593	-17.3345	32.635	14.3807	14.4545	43.4279	24.3165	68.2853	72.6967	81.4474	69.8828
723	517	357	383	441	489	453	180	11	156	0.113043	-0.0715026	0.16134	0.558036	-0.651838	0.483444	0.34811	0.24244	527	0.544395	7.26217	7.68009	7.87837	8.02596	0.703459	0.784842	0.823292	72.2227	39.0245	13.18	5.64622	0.483521	86.0595	3.39192	40.5416	8.02596	29.119	47.845	40.9967	7.09397	8.07737	31.792	7.26217	7.61166	12.4409	55.8383	39.8587	40.3254	47.7305	56.7782
737	511	329	299	304	321	273	86	28	98	-0.0664506	-0.279099	-0.0948256	0.614583	-0.831703	0.492228	0.485465	0.218063	994.5	-0.456011	6.68688	6.48715	6.84702	7.99479	0.785934	0.789567	0.850211	18.2637	19.5162	13.16	4.414	-0.405042	45.4873	2.69235	20.0137	7.99479	20.6661	18.1483	21.7359	6.90344	9.98163	34.701	6.68688	6.72395	15.4169	13.5607	24.8072	23.2931	27.188	19.4962
3861	3730	3972	4036	4164	4391	4648	1559	23	4099	0.0393034	0.0706366	0.0561224	1.12241	-0.582038	0.0235827	-0.127791	0.0132903	-16718.5	0.382865	15.9215	16.6887	16.3752	15.5085	-0.503695	0.286768	1.03924	46.8968	26.6775	13.11	11.5953	0.339998	13.9417	2.98801	23.8229	15.5085	19.1136	23.6579	18.4976	15.8369	-25.5701	32.2474	15.9215	16.0881	39.4389	26.3547	24.0554	24.8161	25.6398	25.8722
729	513	345	327	247	271	245	58	3	161	-0.204188	-0.384615	-0.291364	0.899123	-0.88694	0.172237	0.428969	0.162113	732.25	-0.662946	6.88942	6.25732	6.47127	8.0052	0.754181	0.556385	0.965176	19.7807	19.7146	13.08	3.87088	-0.588858	37.3389	2.70145	20.4244	8.0052	24.8413	19.4412	21.4729	7.01358	9.01335	33.3157	6.88942	6.27431	36.8507	23.7883	26.2073	23.3984	27.1696	25.6072
1054	920	669	676	465	486	418	117	9	184	-0.225275	-0.370067	-0.321566	0.607565	-0.872826	0.39374	0.563297	0.0493783	2040.25	-0.685105	8.77638	7.47697	7.86222	9.72589	0.825871	0.732942	0.846963	47.9774	27.0891	12.98	4.89097	-0.608468	23.2154	3.0033	28.2933	9.72589	49.5753	30.4864	29.602	8.74598	12.6832	57.6036	8.77638	7.74731	65.3955	35.9874	27.9412	25.6436	30.3081	34.5815
1388	1341	1275	1214	964	1054	808	91	9	269	-0.210826	-0.234807	-0.300999	0.487365	-0.93214	0.510909	0.536082	-0.0694066	2796.5	-0.670175	10.6678	9.31402	10.1769	11.0275	0.812351	0.799431	0.786958	98.6046	57.8886	12.91	4.49794	-0.595171	28.5534	3.8684	68.5232	11.0275	53.2461	72.1015	77.4928	10.8435	14.0887	74.0578	10.6678	9.87853	64.6997	17.9025	50.9398	50.6172	62.5722	50.616
2680	2566	2353	2433	3193	3587	3772	626	14	1998	0.231799	0.190409	0.330986	0.750066	-0.756041	0.307572	-0.0489251	0.156555	-7493.75	0.69173	13.4497	15.5665	15.3077	13.6905	-0.365744	0.675019	0.908587	48.7301	27.3818	12.9	8.55444	0.614286	32.4779	3.01407	24.3439	13.6905	22.3158	24.8011	25.868	13.3007	-19.5689	31.6458	13.4497	14.7254	23.1106	31.9421	22.1032	23.5417	21.7991	25.9704
880	707	461	434	559	506	639	183	13	195	0.0304942	-0.181287	0.0435262	0.765306	-0.74116	0.430657	0.306839	0.195462	669.25	0.351763	7.57117	8.61325	7.96863	8.90854	0.674482	0.755168	0.914699	49.4927	27.6835	12.87	5.67741	0.31242	74.5205	3.0251	28.4422	8.90854	42.7142	30.9432	31.9354	7.72503	8.74707	39.1241	7.57117	8.23766	8.69248	19.9108	27.1089	27.5192	30.2486	25.7594
2271	2177	2069	2188	2974	3290	3505	689	11	1945	0.257625	0.233721	0.36786	0.922682	-0.683509	0.286239	-0.195343	0.165221	-10453	0.716519	12.9822	15.1902	14.873	12.9604	-0.580229	0.659036	0.973533	44.3744	25.7569	12.85	8.83228	0.636301	28.5932	2.95323	24.4633	12.9604	27.4972	25.4568	25.5848	12.7425	-21.8649	30.8333	12.9822	14.3807	21.8841	37.2242	21.3673	22.6461	21.0554	28.1402
1181	1010	811	733	688	714	700	144	8	436	-0.140647	-0.246144	-0.200783	0.90671	-0.857426	0.167144	0.29156	0.049795	472.25	-0.585566	9.01643	8.87904	8.93784	10.0332	0.663095	0.550846	0.967883	5.80425	18.6528	12.82	5.24148	-0.520048	26.1571	2.65205	19.7883	10.0332	38.4405	20.4603	19.4715	9.32553	7.78737	48.9384	9.01643	8.82801	36.9242	6.28405	20.0924	20.464	20.5786	9.58469
750	511	333	307	342	399	334	154	9	100	-0.0060423	-0.216667	-0.00862282	0.644377	-0.69863	0.5338	0.413555	0.236676	838.75	-0.205061	6.746	6.93823	7.36192	7.99479	0.745037	0.811196	0.863734	32.1284	22.0829	12.8	5.36011	-0.182138	48.019	2.80556	22.6605	7.99479	15.4361	21.3471	25.091	6.9313	9.43071	33.5694	6.746	6.99319	10.827	17.0522	25.9725	25.0145	29.0489	23.1095
943	648	449	421	378	372	352	69	11	173	-0.130982	-0.305136	-0.186942	0.756522	-0.893519	0.332046	0.425743	0.178408	986	-0.571789	7.49481	7.0607	7.19197	8.6535	0.752285	0.692468	0.911186	9.88234	18.785	12.79	4.10157	-0.507853	41.318	2.6583	19.3109	8.6535	3.01982	13.2469	16.2352	7.65741	9.95311	41.5686	7.49481	7.23043	29.7846	19.0563	23.0779	21.8791	25.103	21.2327
887	656	485	450	417	408	374	138	46	200	-0.133178	-0.277507	-0.190083	0.684636	-0.789634	0.299475	0.441758	0.129264	965.25	-0.574973	7.66309	7.20483	7.41686	8.68896	0.761602	0.669042	0.88136	12.679	18.9603	12.78	5.16765	-0.510674	27.5783	2.66654	19.4982	8.68896	23.4428	17.8787	17.1585	7.85683	9.8828	43.1003	7.66309	7.471	28.8001	15.7999	22.6469	21.9234	24.6394	18.8925
1271	1042	911	850	787	807	791	148	10	483	-0.128872	-0.194269	-0.183981	0.887624	-0.857965	0.185497	0.2509	0.0400421	168	-0.568754	9.47268	9.24823	9.31018	10.1381	0.630716	0.570312	0.961044	17.9966	19.4834	12.78	5.28957	-0.505111	26.7141	2.69084	21.0294	10.1381	25.6703	20.4252	19.6133	9.69407	5.51785	46.0821	9.47268	9.23262	40.7967	13.8443	19.9158	20.7219	19.7854	13.8938
1709	1657	1772	1721	1681	1776	1742	360	14	1215	-0.0841236	-0.0507292	-0.120113	1.04943	-0.78274	0.103982	0.0266419	-0.0500741	-3371.5	-0.493397	11.9838	12.0323	12.1101	11.8333	0.298668	0.47024	1.01621	44.7334	25.8845	12.72	7.11379	-0.438167	17.6471	2.9581	24.9045	11.8333	41.9802	26.8152	23.6179	12.101	-14.9948	30.1259	11.9838	11.8902	45.538	21.8355	20.5556	22.8554	17.5382	17.0431
1947	1864	1778	1686	1586	1696	1624	238	14	1121	-0.0589637	-0.0824623	-0.0841894	0.929747	-0.872318	0.169937	0.118512	-0.00409431	-1897.75	-0.438281	11.902	11.7543	11.9255	12.3069	0.491195	0.553897	0.976011	49.7972	27.8054	12.59	6.19715	-0.38922	25.5101	3.02954	25.3784	12.3069	33.6056	27.0912	26.5016	12.1146	-12.3807	31.5709	11.902	11.6619	49.6209	17.0788	21.6017	23.7193	19.544	15.7218
800	614	496	502	668	607	569	320	12	458	0.0293542	-0.077193	0.0419003	1.37072	-0.478827	0.0691057	-0.0801498	0.14409	-1819	0.347327	7.94757	8.28649	8.467	8.49942	-0.431156	0.410366	1.11084	30.9476	21.7984	12.48	6.8399	0.308477	51.4592	2.79346	24.9247	8.49942	38.5722	26.7311	30.3674	7.91578	-12.2071	7.99722	7.94757	8.74162	9.21914	38.3742	21.8204	23.904	19.9474	27.879
1053	1001	683	634	460	466	410	107	11	248	-0.263645	-0.431022	-0.376336	0.811558	-0.893107	0.232198	0.512085	0.0301739	1930.5	-0.72198	8.59072	7.42896	7.75286	10.0033	0.800044	0.614638	0.932767	28.0104	21.144	12.39	4.74746	-0.641219	22.1289	2.76522	21.2697	10.0033	67.7609	23.5397	21.5048	8.80657	12.4515	57.3973	8.59072	7.71944	57.9242	13.7983	23.467	21.5898	25.0928	18.0019
3684	3459	3851	3980	4282	4659	5058	1620	20	4345	0.0805778	0.133626	0.115059	1.27243	-0.531657	0.0204036	-0.249512	0.0319256	-22280.2	0.486378	15.8475	17.1656	16.7018	15.1234	-0.62955	0.273255	1.08362	41.7777	24.8676	12.37	11.7446	0.431922	10.7642	2.91885	24.5919	15.1234	18.758	24.7901	18.4505	15.6744	-28.1389	34.0655	15.8475	16.2386	34.4385	27.1455	24.2872	23.8702	26.8239	27.2269
877	695	561	499	432	470	435	98	8	231	-0.183544	-0.284658	-0.261983	0.842377	-0.858993	0.252427	0.36141	0.0595138	744	-0.639869	7.93171	7.57698	7.77498	8.85785	0.712306	0.631993	0.944428	9.99887	18.7909	12.33	4.61044	-0.568303	29.4142	2.65858	19.5587	8.85785	39.8392	20.348	20.3602	8.24747	9.06131	44.2305	7.93171	7.55953	36.0751	4.01865	22.3597	21.622	24.253	10.9446
1059	931	691	617	474	499	466	97	8	292	-0.257507	-0.39059	-0.367577	0.936275	-0.895811	0.165714	0.418126	0.029835	1291	-0.716335	8.51324	7.75286	7.93171	9.7645	0.747772	0.549271	0.97829	11.3404	18.8678	12.3	4.5947	-0.636204	24.1147	2.6622	19.1404	9.7645	50.8137	20.9891	19.3665	8.84082	10.8887	53.4054	8.51324	7.79697	51.5472	3.86026	21.9189	20.742	23.5729	10.2993
4371	3914	3673	3808	4213	4531	4491	633	15	2404	0.121397	0.0899791	0.173346	0.791382	-0.838273	0.322053	0.0267576	0.104419	-6967	0.557577	15.6159	16.4986	16.5475	15.7594	0.2991	0.68545	0.924972	122.454	80.213	12.26	8.5862	0.495149	30.2259	4.31269	43.5056	15.7594	24.0616	53.0611	56.005	15.4291	-19.0992	31.6132	15.6159	16.1509	31.9397	27.7832	56.0253	61.8326	57.6285	51.9745
803	608	484	439	381	398	373	104	7	209	-0.18773	-0.294995	-0.267938	0.836858	-0.828947	0.225926	0.374011	0.0789724	666.5	-0.644681	7.60014	7.1984	7.35576	8.47165	0.72049	0.609053	0.942361	7.93539	18.7036	12.25	4.70267	-0.572591	28.0045	2.65445	19.5692	8.47165	35.215	19.7849	19.3331	7.85142	8.73508	40.1745	7.60014	7.2495	33.1719	9.99316	22.9853	22.0841	25.0754	15.5624
977	1088	633	1264	2515	2945	3381	357	7	502	0.621864	0.42782	0.887908	0.495028	-0.671875	0.687908	-0.105263	0.48931	-3083.25	0.961146	10.8122	15.0089	14.3338	10.2851	-0.472163	0.882762	0.791061	133.001	91.6818	12.25	7.09397	0.853555	68.7206	4.50915	58.7515	10.2851	106.024	28.2997	30.8503	8.5862	-14.5547	11.997	10.8122	13.5992	23.6295	238.658	71.777	88.6525	-18.6009	-2.34262
2147	1908	1751	1673	1641	1679	1658	1103	1008	1348	-0.0315169	-0.0743243	-0.0450005	0.908151	-0.421908	0.0989305	0.122023	0.039627	-2458	-0.355691	11.8713	11.8357	11.8855	12.403	0.495999	0.462498	0.968395	19.1707	19.6324	12.22	10.3322	-0.315875	24.5644	2.69769	25.4563	12.403	19.3348	26.1698	25.2083	12.053	-13.4957	30.7183	11.8713	11.7951	44.7914	18.5576	18.6411	20.4643	16.0041	13.9005
1472	1320	1291	1231	1178	1221	1205	222	14	834	-0.0803347	-0.0913601	-0.114697	1.00637	-0.831818	0.137093	0.088211	-0.00213468	-1712.25	-0.485868	10.7173	10.6413	10.6882	10.9696	0.445151	0.51563	1.00212	34.5469	22.7039	12.19	6.05505	-0.431487	24.3417	2.83161	24.8811	10.9696	35.9939	26.5674	25.5795	10.8887	-11.9634	27.3081	10.7173	10.5612	43.6105	18.2131	19.9438	21.6582	18.1319	15.3262
1312	1330	1049	884	627	665	556	90	19	211	-0.346598	-0.446438	-0.494806	0.559921	-0.932331	0.413889	0.647059	-0.0706813	3472.5	-0.790943	9.59734	8.2229	8.72852	10.9972	0.864931	0.745237	0.824219	18.4445	19.5388	12.07	4.4814	-0.702439	19.8821	2.69339	18.8391	10.9972	65.836	21.629	18.5529	10.1607	15.1431	73.7648	9.59734	8.55899	70.1171	-10.8261	20.9008	20.3399	22.2703	-1.35237
939	769	576	500	395	397	337	61	5	125	-0.301695	-0.426716	-0.430612	0.556634	-0.920676	0.423963	0.634431	0.04	1967	-0.755142	7.93701	6.95894	7.3496	9.16169	0.859267	0.751235	0.822602	11.1136	18.8537	12	3.9365	-0.670691	28.8978	2.66154	18.6861	9.16169	42.8575	19.6848	19.5013	8.32034	12.5295	53.9512	7.93701	7.33723	43.739	-2.31687	22.878	21.3018	24.6037	6.80085
1015	770	592	623	645	707	682	156	9	382	-0.0571429	-0.186441	-0.0815688	0.92803	-0.797403	0.16044	0.222222	0.131646	-62.5	-0.433685	8.54075	8.80227	8.90854	9.16566	0.605707	0.54338	0.97541	46.7098	26.6074	11.96	5.38321	-0.385171	33.9131	2.98539	26.0298	9.16566	21.099	27.1928	28.685	8.39667	-3.9685	20.2598	8.54075	8.64012	26.482	47.6349	25.2805	26.2018	27.1412	37.6651
1847	1730	1658	1605	1411	1421	1371	1086	1007	1184	-0.103494	-0.124472	-0.147769	0.939124	-0.372254	0.0644014	0.155259	-0.0187404	-1732.75	-0.528681	11.7082	11.1091	11.2425	12.0046	0.537467	0.400835	0.979282	29.8043	21.5347	11.94	10.2788	-0.469503	26.2098	2.78214	24.9143	12.0046	32.6651	26.4343	25.983	11.8357	-12.011	30.9558	11.7082	11.2161	57.234	21.2203	19.125	20.901	16.8131	16.1232
1057	877	682	625	643	692	635	105	6	345	-0.108042	-0.230014	-0.154231	0.766849	-0.880274	0.228188	0.35131	0.0814815	738	-0.536278	8.54988	8.59524	8.84509	9.57194	0.705608	0.611079	0.915314	25.8224	20.7058	11.92	4.71769	-0.476282	35.4194	2.74598	21.3592	9.57194	38.4474	22.3719	24.0235	8.80227	9.03689	48.3772	8.54988	8.63118	26.9866	10.5247	21.3921	21.7857	22.3574	13.775
737	528	321	299	294	311	257	61	8	43	-0.126316	-0.359073	-0.180244	0.433735	-0.88447	0.705479	0.660377	0.211302	1499.5	-0.564876	6.68688	6.35786	6.77517	8.08248	0.870825	0.890215	0.756963	14.2254	19.0867	11.92	3.9365	-0.501748	44.3848	2.67246	19.2203	8.08248	28.2384	18.2957	21.7034	6.84702	11.4459	38.0026	6.68688	6.6494	17.3662	19.9449	24.7069	22.888	26.7709	23.061
1483	1464	1366	1263	1112	1186	1175	257	38	752	-0.14214	-0.175904	-0.20294	0.964912	-0.824454	0.154106	0.193154	-0.0425491	-428.5	-0.587655	10.8094	10.5523	10.5851	11.3548	0.578053	0.536133	0.988165	17.8131	19.4612	11.9	6.35786	-0.521882	17.3703	2.68982	24.0933	11.3548	53.1465	26.0796	22.6702	11.0956	-7.53906	32.0836	10.8094	10.3602	53.0428	11.2058	18.8812	20.2534	17.3442	10.3115
875	632	427	356	291	287	243	55	7	88	-0.274627	-0.444571	-0.391917	0.514403	-0.912975	0.468278	0.669749	0.133874	1725.25	-0.731809	7.08734	6.24025	6.5962	8.58168	0.874925	0.776547	0.80125	6.93225	18.6747	11.89	3.80295	-0.650001	32.5897	2.65309	18.6383	8.58168	18.8965	15.7427	16.4726	7.53025	11.9936	45.8616	7.08734	6.62671	33.0571	-10.2259	24.4868	21.9178	25.4325	1.64269
741	543	384	358	357	382	344	68	6	132	-0.124451	-0.289786	-0.177605	0.605351	-0.87477	0.387471	0.5	0.150442	1010.25	-0.562106	7.10059	7.0068	7.25584	8.15831	0.793701	0.729032	0.845933	14.1998	19.0845	11.89	4.08166	-0.499267	42.381	2.67235	19.5791	8.15831	33.0917	19.5082	22.5397	7.26848	10.0341	38.2886	7.10059	7.09397	19.6835	18.7513	23.5839	22.7647	25.8901	21.663
2084	1982	1828	1818	2053	2188	2096	1119	1010	1470	0.0756005	0.0352884	0.107946	0.916314	-0.435419	0.182652	0.00839481	0.0705479	-4442.25	0.476141	12.2048	12.7977	12.9822	12.5613	0.203237	0.567381	0.971288	88.415	49.8767	11.85	10.3819	0.422839	13.9439	3.681	30.8413	12.5613	29.7718	34.3425	31.0702	12.2272	-16.4387	29.9593	12.2048	12.7095	31.8841	26.4822	35.9428	39.9104	34.8334	33.0966
698	473	324	288	280	295	268	78	9	132	-0.121107	-0.301238	-0.172813	0.795276	-0.835095	0.316062	0.401481	0.19	657.5	-0.557005	6.60385	6.44731	6.65693	7.79149	0.737715	0.681173	0.926487	2.8948	18.6479	11.8	4.27266	-0.494755	39.9635	2.65182	19.5306	7.79149	19.0984	17.135	19.7453	6.86829	8.69558	31.1288	6.60385	6.54213	17.3667	8.17384	24.6917	23.116	26.9853	15.8818
784	554	373	348	315	326	272	58	10	122	-0.167449	-0.35122	-0.238957	0.838346	-0.895307	0.371134	0.425997	0.169265	922	-0.620545	7.03385	6.47922	6.88239	8.21303	0.752435	0.718638	0.942919	31.8789	22.0218	11.76	3.87088	-0.551181	40.8336	2.80296	22.5666	8.21303	20.9101	21.996	24.7143	7.1984	9.73293	36.8688	7.03385	6.80409	25.4249	19.163	26.4586	24.5589	28.9572	24.305
940	745	517	455	379	409	344	83	21	189	-0.21934	-0.384758	-0.313059	0.851964	-0.888591	0.273077	0.450828	0.10282	1249.5	-0.679009	7.69137	7.0068	7.42291	9.06537	0.766779	0.648776	0.947997	24.8024	20.5159	11.75	4.36207	-0.603076	29.5261	2.73756	20.8626	9.06537	35.4691	21.4505	21.5631	8.02596	10.7707	46.8172	7.69137	7.2368	37.1469	1.85462	24.1861	22.2773	25.9937	10.8395
720	527	347	298	247	259	215	59	12	72	-0.243728	-0.428184	-0.347776	0.630332	-0.888046	0.491166	0.59697	0.145846	1325.25	-0.703234	6.67942	5.99073	6.37431	8.07737	0.84201	0.788998	0.857412	1.23375	18.6785	11.72	3.893	-0.624647	33.7138	2.65327	18.9226	8.07737	34.7997	18.9079	20.0501	7.02711	10.9841	38.5068	6.67942	6.27431	28.1336	-0.990997	25.4461	22.6601	26.2507	9.05573
754	553	362	329	281	281	246	52	8	136	-0.246127	-0.432642	-0.351211	0.90411	-0.905967	0.233803	0.472703	0.14673	991.25	-0.705542	6.90344	6.26583	6.54991	8.20808	0.778986	0.616051	0.966957	14.9625	19.1544	11.7	3.73251	-0.626691	35.7812	2.67561	19.6632	8.20808	32.1061	19.4791	21.152	7.12694	9.97075	36.8077	6.90344	6.54991	28.2215	12.7579	25.0206	22.7265	26.5632	18.5003
5375	5385	5764	5890	6654	7205	7514	1339	17	4282	0.0590924	0.0928999	0.084381	0.883477	-0.751346	0.204828	-0.0312135	0.0143217	-14785.5	0.438613	18.0595	19.5865	19.3143	17.5278	-0.314857	0.589472	0.959544	59.5818	32.1563	11.68	11.022	0.389503	12.5228	3.17996	22.5256	17.5278	22.5972	22.1604	16.1261	17.9298	-24.544	24.8729	18.0595	18.8088	21.1235	24.3524	31.2392	29.602	35.482	32.4233
7378	7316	7748	7693	8174	8553	8801	2382	23	5044	0.0387693	0.067372	0.0553611	0.847605	-0.674412	0.248118	0.0151946	0.00816078	-15088.2	0.381126	19.7408	20.6464	20.4506	19.4129	0.247683	0.628376	0.946378	74.636	40.4956	11.61	13.3551	0.338451	22.8315	3.43402	22.1124	19.4129	43.6586	23.6682	21.8869	19.7878	-24.7104	14.0079	19.7408	20.144	19.1382	30.9846	36.5799	36.3567	43.4095	42.2512
1661	1439	1285	1250	1224	1224	1186	1053	1009	1067	-0.0404858	-0.0967988	-0.0578037	0.967932	-0.268242	0.0523979	0.112916	0.0509601	-2062.5	-0.386651	10.7722	10.5851	10.697	11.2898	0.483339	0.374201	0.989194	24.6956	20.4966	11.59	10.1736	-0.343374	23.7927	2.7367	25.1315	11.2898	24.0655	26.1172	24.913	10.8718	-12.7291	26.7322	10.7722	10.697	41.52	22.8506	19.013	20.6003	17.0814	17.29
4094	3754	4106	4018	4144	4334	4491	1702	59	2567	0.00267185	0.0474499	0.0038152	0.903343	-0.546617	0.233159	0.00334091	0.000608495	-7991.25	0.156257	15.8978	16.4986	16.3041	15.5417	0.149493	0.615485	0.966683	48.6362	27.345	11.57	11.9395	0.138762	22.8485	3.01273	24.2928	15.5417	20.9671	24.5819	22.9071	16.013	-19.9927	30.5338	15.8978	16.0623	39.5347	25.5612	24.0778	25.0465	25.3881	25.2326
805	612	461	430	357	385	327	80	8	181	-0.216359	-0.346535	-0.308786	0.723906	-0.869281	0.242678	0.480048	0.0889328	1016	-0.675905	7.54784	6.88942	7.27479	8.49018	0.783	0.623749	0.897899	33.4143	22.4067	11.55	4.30887	-0.600332	30.4171	2.8192	22.9326	8.49018	35.983	24.1098	24.6288	7.72503	10.0531	42.4116	7.54784	7.09397	36.1389	17.5211	25.9451	24.3313	28.5939	23.0363
1790	1567	1370	1328	1263	1268	1220	1055	1007	1073	-0.0474006	-0.114113	-0.067677	0.897271	-0.326739	0.0746011	0.167225	0.0512465	-1466.25	-0.407518	10.9917	10.6853	10.8236	11.6151	0.550935	0.420967	0.964513	26.1344	20.7657	11.55	10.1801	-0.361905	24.0514	2.74863	24.8625	11.6151	22.9298	25.6239	24.448	11.1064	-11.3606	28.6864	10.9917	10.8094	45.321	21.8535	19.0432	20.6464	17.0898	16.7102
3182	3078	2950	2992	3415	3597	3661	482	52	2448	0.131842	0.110919	0.188259	0.846334	-0.843405	0.222116	-0.0279488	0.0872525	-8401.5	0.573128	14.4097	15.4123	15.3219	14.5464	-0.303474	0.605611	0.945904	74.5104	40.4178	11.53	7.84059	0.508961	41.6392	3.43182	24.778	14.5464	19.7743	25.1841	27.9941	14.3419	-20.3291	32.3547	14.4097	15.059	31.0439	27.6436	27.7795	30.9981	25.3281	26.3474
1677	1561	1531	1477	1441	1502	1522	301	25	1081	-0.0309764	-0.0406667	-0.044228	0.986796	-0.807175	0.142063	0.0472996	0.00874069	-2768.5	-0.353643	11.3883	11.5028	11.4522	11.6003	0.361648	0.521788	0.995579	31.4307	21.9134	11.5	6.70176	-0.314058	25.2707	2.79836	25.1252	11.6003	36.17	26.8833	26.2038	11.5255	-14.0415	28.6722	11.3883	11.295	43.9981	20.5814	19.2219	21.0718	16.7761	15.714
7129	7025	7625	7429	7565	7879	8023	3020	57	3559	0.0209296	0.0618323	0.0298867	0.681675	-0.570107	0.381581	0.128967	-0.00560501	-5355	0.310332	19.5124	20.0191	19.8987	19.1521	0.505235	0.725319	0.880087	68.76	37.0033	11.49	14.4545	0.275584	39.8739	3.33232	25.6241	19.1521	42.5914	27.6657	30.2129	19.6825	-17.4952	14.0386	19.5124	19.6307	27.1536	35.7888	34.328	34.5404	40.2811	42.2223
2085	1879	1841	2115	2294	2608	2933	1380	1011	2436	-0.0532037	-0.0633843	-0.0759655	1.56616	-0.265567	-0.190907	-0.159472	0.00781461	-9964.75	-0.423518	12.8362	14.3143	13.7648	12.3398	-0.542286	-0.575803	1.1613	13.6722	19.0391	11.44	11.1334	-0.376109	33.2501	2.67023	27.6833	12.3398	22.203	29.7295	31.2078	12.2561	-21.519	29.6124	12.8362	13.1886	36.0203	55.4936	19.489	20.3254	19.1418	35.0233
837	568	403	394	361	354	315	84	9	115	-0.124128	-0.287982	-0.177149	0.605096	-0.852113	0.463869	0.498681	0.17629	1117.25	-0.561625	7.33104	6.80409	7.07404	8.28164	0.793002	0.774103	0.845814	24.392	20.4421	11.41	4.37952	-0.498835	38.1058	2.73427	20.8587	8.28164	7.36077	16.925	19.1236	7.38644	10.3765	40.2528	7.33104	7.12037	27.0304	30.6509	24.4262	23.3877	26.9609	29.2386
971	849	696	679	541	576	513	88	7	241	-0.191781	-0.28539	-0.273763	0.654661	-0.896349	0.323983	0.466321	0.0179894	1379.25	-0.649319	8.78935	8.0052	8.32034	9.46897	0.775464	0.686817	0.868305	42.5277	25.1183	11.36	4.44796	-0.57668	30.6874	2.92862	25.8568	9.46897	55.1688	27.773	28.5884	8.8621	11.1313	54.202	8.78935	8.14828	50.4073	26.5302	25.3041	24.6288	28.2128	27.9613
851	661	515	468	373	377	355	74	9	236	-0.220379	-0.335354	-0.314542	1.05775	-0.888048	0.164602	0.310208	0.0678733	520.75	-0.680079	7.76394	7.0807	7.22405	8.71098	0.676941	0.548039	1.01889	14.3824	19.1008	11.34	4.19834	-0.604028	31.4993	2.67311	20.102	8.71098	37.2358	20.7029	21.3246	8.01559	8.04532	39.8695	7.76394	7.1984	41.3942	10.0439	23.3469	21.9682	25.3613	15.8201
1651	1512	1523	1519	1531	1659	1699	356	17	1201	-0.0456574	-0.04204	-0.0651892	1.07266	-0.76455	0.0729448	0.00699301	-0.000821423	-3566.25	-0.402462	11.4953	11.9325	11.8381	11.4776	0.191229	0.417829	1.02366	30.5684	21.7097	11.29	7.08734	-0.357413	20.9467	2.78966	25.3047	11.4776	34.131	27.0206	25.0057	11.5054	-15.2781	28.0364	11.4953	11.5255	40.9561	27.8386	19.1016	21.0167	16.443	19.6565
894	680	556	597	550	568	581	145	14	359	-0.154725	-0.25115	-0.220849	1.23833	-0.786765	0.0626632	0.148649	0.0783257	-385	-0.604457	8.42025	8.34434	8.28164	8.79366	0.529729	0.397195	1.07385	36.5871	23.2678	11.29	5.25359	-0.53685	24.8614	2.85486	24.6669	8.79366	29.3299	25.8821	24.9814	8.2229	-7.27479	14.8292	8.42025	8.19321	34.6701	53.4817	23.8513	24.4103	25.5938	38.9968
1931	1743	1511	1455	1366	1364	1312	1080	1007	1127	-0.0659612	-0.136616	-0.0941784	0.907855	-0.380379	0.0803754	0.183701	0.0371196	-1266.25	-0.454971	11.3315	10.9474	11.0902	12.0346	0.568465	0.43156	0.96829	24.6546	20.4892	11.26	10.2599	-0.404045	25.1894	2.73637	24.7832	12.0346	25.0777	25.7026	24.883	11.4751	-10.8187	30.5654	11.3315	11.0956	47.977	20.1946	18.8518	20.5738	16.5466	15.3065
1177	1138	856	714	418	418	319	67	6	120	-0.431438	-0.539919	-0.615873	0.45	-0.941125	0.478261	0.762974	-0.0603902	3525	-0.850806	8.93784	6.83277	7.47697	10.4403	0.91377	0.782027	0.766309	24.0661	20.3846	11.21	4.06155	-0.755625	19.7147	2.7317	19.8885	10.4403	63.838	22.4082	19.3678	9.49492	15.219	70.0748	8.93784	7.47697	85.7154	-13.5713	23.522	20.9065	24.1201	-1.97939
761	558	375	347	351	374	342	60	7	127	-0.114413	-0.303738	-0.163278	0.557047	-0.892473	0.402353	0.541436	0.170813	1144.25	-0.546566	7.02711	6.99319	7.20483	8.23275	0.815047	0.738248	0.822806	7.37262	18.6863	11.21	3.91487	-0.485466	46.2221	2.65364	19.0759	8.23275	31.4258	18.6046	22.2776	7.21125	10.4594	38.8603	7.02711	7.054	18.2676	17.0268	23.4283	22.4232	25.6421	20.4272
756	496	327	319	270	259	210	70	7	88	-0.229323	-0.415121	-0.32721	0.668293	-0.858871	0.399317	0.567141	0.190093	1142.75	-0.68909	6.83277	5.94392	6.37431	7.91578	0.827746	0.736387	0.87429	31.2734	21.8757	11.21	4.12129	-0.612091	31.7887	2.79675	22.3353	7.91578	6.15641	19.2097	19.8427	6.88942	10.4548	35.7893	6.83277	6.4633	28.1849	31.5415	27.3506	25.0198	29.4969	31.6676
3570	3472	3670	3651	4372	4985	5273	804	36	2946	0.0866103	0.11406	0.123673	0.893724	-0.768433	0.194201	-0.058313	0.0390154	-10913	0.498224	15.3982	17.4055	17.0826	15.1423	-0.387783	0.579096	0.96324	36.8547	23.3445	11.19	9.29862	0.442442	21.619	2.858	25.3469	15.1423	18.9763	25.9678	24.0459	15.4249	-22.181	31.7996	15.3982	16.3516	25.6187	25.6022	24.626	23.5995	27.2313	26.6822
804	651	510	499	333	335	284	99	11	172	-0.259259	-0.369085	-0.370027	0.756667	-0.847926	0.271186	0.482916	0.039548	1148	-0.717923	7.93171	6.57314	6.94515	8.66683	0.784556	0.647276	0.911244	42.7065	25.1789	11.09	4.62607	-0.637644	23.6643	2.93097	25.8997	8.66683	50.4677	27.9433	26.8993	7.98957	10.4708	45.7304	7.93171	6.9313	59.014	29.2655	28.715	26.0233	30.5814	31.2948
1443	1303	1254	1187	1203	1293	1277	284	66	905	-0.0278689	-0.0470068	-0.0397897	1.02277	-0.782041	0.134385	0.0357711	0.0235546	-2425.25	-0.341395	10.5881	10.8492	10.8943	10.9223	0.329491	0.512213	1.00753	31.1996	21.8581	11.05	6.57314	-0.303184	26.7972	2.796	25.063	10.9223	38.3355	26.8917	26.647	10.7837	-13.4354	25.9119	10.5881	10.6354	37.5762	16.5635	19.5353	21.2864	17.461	13.7961
812	613	372	343	340	356	310	77	8	68	-0.110448	-0.345774	-0.157619	0.479866	-0.874388	0.628415	0.621693	0.197411	1618.5	-0.540177	7	6.7679	7.08734	8.49481	0.853477	0.856543	0.782901	6.73907	18.6702	11.04	4.25432	-0.479791	41.521	2.65287	18.7037	8.49481	33.8011	18.481	21.3806	7.19197	11.741	42.0936	7	6.97953	19.3032	16.1854	23.5965	22.0341	25.5586	19.8475
1890	1757	1538	1449	1434	1502	1457	1072	1008	1140	-0.0346451	-0.100877	-0.0494661	0.850871	-0.389869	0.114563	0.179987	0.0389002	-1349.75	-0.367087	11.3159	11.3367	11.4522	12.0668	0.564608	0.485678	0.947592	15.7043	19.2274	10.97	10.2345	-0.325997	24.009	2.679	24.9528	12.0668	30.4925	26.351	25.2387	11.543	-11.0514	30.6364	11.3159	11.2767	42.294	15.4844	18.5343	20.2644	16.0715	12.0539
794	603	394	378	308	319	284	67	9	100	-0.193939	-0.387802	-0.276766	0.661654	-0.888889	0.453552	0.548139	0.147186	1366.5	-0.651685	7.23043	6.57314	6.83277	8.44836	0.818396	0.76832	0.871386	15.0014	19.1581	10.96	4.06155	-0.578836	35.5554	2.67578	19.3831	8.44836	36.6555	19.741	21.365	7.33104	11.0969	41.6446	7.23043	6.75331	34.6549	25.9179	24.4831	22.3646	26.12	25.9989
2038	1862	1749	1716	1704	1742	1731	1134	1010	1457	-0.0395245	-0.0707303	-0.0564338	0.967203	-0.390977	0.051741	0.0872993	0.0218121	-3214.75	-0.383572	11.9722	12.0069	12.0323	12.3025	0.443612	0.37263	0.988946	26.9083	20.918	10.92	10.4281	-0.340635	25.6576	2.75533	25.4015	12.3025	24.9556	26.579	25.9824	12.0484	-14.7587	30.0732	11.9722	11.9442	43.7031	23.896	18.8973	20.7482	16.3061	17.307
1680	1660	1794	1780	1763	1908	1988	350	26	1446	-0.0653207	-0.0265925	-0.0932661	1.18297	-0.789157	0.0423841	-0.0573538	-0.0488161	-5178	-0.453497	12.1192	12.574	12.403	11.8405	-0.385645	0.348659	1.05761	3.73148	18.6417	10.91	7.0473	-0.402733	19.3366	2.65152	26.7924	11.8405	45.9868	28.9853	26.696	12.1509	-17.3003	29.517	12.1192	12.0805	44.3168	26.0808	18.6399	20.0865	16.8487	18.9748
7257	6958	7486	7376	7511	7839	8127	2806	20	4167	-0.00685945	0.029703	-0.00979501	0.684724	-0.596723	0.278504	0.158315	-0.0111775	-5697.25	-0.213961	19.4659	20.1053	19.8649	19.091	0.540971	0.653046	0.881397	51.5646	28.5289	10.77	14.1047	-0.190004	70.7722	3.05559	24.5288	19.091	52.2559	26.518	29.1141	19.5622	-17.8603	14.795	19.4659	19.5839	27.4224	32.4791	33.9545	32.6409	39.3683	39.8396
980	763	562	538	582	609	624	193	82	332	-0.0246126	-0.175655	-0.0351331	0.893458	-0.747051	0.234141	0.229654	0.148162	93.25	-0.327521	8.13319	8.54532	8.47629	9.1378	0.612385	0.616348	0.963144	2.0394	18.6607	10.63	5.779	-0.290883	35.3712	2.65242	20.7008	9.1378	28.9472	20.4276	22.0224	8.25237	4.53471	33.885	8.13319	8.34913	21.2241	22.9193	20.8155	21.2373	21.5279	20.7431
1277	1140	1079	1020	1262	1594	1652	338	17	690	0.00644567	-0.0210479	0.00920261	0.968893	-0.703509	0.226024	0.0368349	0.0468198	-1846.75	0.209558	10.0662	11.8214	11.6814	10.4464	0.332726	0.609141	0.989522	15.7035	19.2273	10.62	6.96582	0.186104	44.2257	2.679	25.255	10.4464	42.8037	27.241	30.3355	10.2567	-12.2688	23.9965	10.0662	10.8065	21.2293	16.5528	18.6183	20.4412	15.9717	12.6429
3210	3060	2958	3051	3668	4030	4219	686	13	2542	0.115959	0.0992052	0.165579	0.907338	-0.775817	0.18993	-0.0508685	0.0799378	-9236	0.549122	14.5038	16.1586	15.9136	14.518	-0.370524	0.574819	0.968106	55.9826	30.4579	10.57	8.81945	0.487643	27.1522	3.12296	23.7551	14.518	19.0462	23.5462	23.1188	14.3549	-20.9811	32.3936	14.5038	15.4221	26.9172	29.5006	23.7371	25.3034	23.8733	26.2451
796	576	382	348	346	371	342	81	19	115	-0.0883191	-0.285714	-0.126043	0.60625	-0.859375	0.471264	0.496104	0.187234	1131.75	-0.501387	7.03385	6.99319	7.18552	8.32034	0.791634	0.778195	0.846351	2.03579	18.6607	10.51	4.32675	-0.445333	43.4033	2.65242	19.0613	8.32034	25.3829	17.5924	20.8607	7.25584	10.4212	39.1739	7.03385	7.02035	19.3712	12.9152	23.4925	22.2784	25.6458	17.8794
704	549	339	511	1157	1475	1609	571	9	320	0.314459	0.0842369	0.448853	1.27846	0.0400729	0.340206	-0.204348	0.332677	-2170.5	0.765658	7.99479	11.718	11.3832	8.18824	-0.589011	0.698094	1.08533	23.4581	20.2797	10.45	8.29619	0.680019	37.8773	2.72701	25.2073	8.18824	51.0094	27.2189	29.4503	6.97268	-12.9475	-0.951717	7.99479	10.4981	6.69874	151.57	19.0538	23.4414	7.48641	41.515
899	652	508	481	485	514	487	117	19	235	-0.0831557	-0.205176	-0.118692	0.895349	-0.820552	0.293233	0.257473	0.133475	314.25	-0.491444	7.83517	7.86761	8.0104	8.67127	0.636176	0.664361	0.963823	18.7941	19.5833	10.41	4.89097	-0.43648	36.2682	2.69543	20.8101	8.67127	18.1595	18.9143	20.6939	7.97911	6.79869	36.6411	7.83517	7.85683	24.0688	20.7286	22.2022	22.2837	23.7496	21.1762
1634	1506	1446	1514	1747	1924	1955	314	10	816	0.0592062	0.0389279	0.0845347	0.877764	-0.791501	0.332242	0.0262351	0.0601235	-2343	0.438879	11.4826	12.504	12.4376	11.4624	0.29714	0.692604	0.957472	94.4544	54.5151	10.36	6.79688	0.389753	55.8139	3.79174	36.2448	11.4624	35.7399	41.0741	43.493	11.3081	-13.2818	28.253	11.4826	12.0438	29.1345	39.0693	41.2253	46.2583	38.452	42.3917
1972	1715	1631	1599	1616	1745	1793	1316	1009	1581	-0.00461965	-0.0297208	-0.00659599	0.993193	-0.232653	0.0109478	0.0331325	0.0475912	-4311.75	-0.18754	11.6936	12.1486	12.0392	11.9698	0.321182	0.222045	0.997726	15.6451	19.2214	10.26	10.9585	-0.166547	26.205	2.67873	26.2523	11.9698	18.545	27.315	26.9441	11.7711	-16.2761	28.6159	11.6936	11.7349	41.1932	23.8983	18.572	20.238	16.2736	17.2836
1742	1614	1536	1514	1457	1503	1511	321	17	1058	-0.0168818	-0.0416263	-0.0241038	0.950168	-0.801115	0.167912	0.0671074	0.0246071	-2468.75	-0.288865	11.4826	11.4751	11.4548	11.7301	0.406372	0.551688	0.983106	41.4832	24.7705	10.15	6.84702	-0.256531	26.7237	2.91504	24.9549	11.7301	33.5792	26.539	26.2425	11.538	-13.5153	28.9969	11.4826	11.3367	45.7611	25.2298	20.3223	22.3222	17.9933	19.363
735	551	364	325	243	243	207	76	11	88	-0.261698	-0.442408	-0.373428	0.71831	-0.862069	0.415282	0.565341	0.131265	1296.75	-0.720116	6.87534	5.91548	6.24025	8.19818	0.826869	0.746073	0.895579	4.81327	18.6428	10.1	4.23582	-0.639637	27.9314	2.65157	18.9085	8.19818	38.9025	19.4527	18.955	7.14004	10.9048	39.3652	6.87534	6.24025	37.4523	8.24951	25.5168	22.4517	25.7554	14.9606
907	699	516	475	420	420	413	100	11	208	-0.164786	-0.307764	-0.2352	0.935135	-0.856938	0.280277	0.337799	0.106107	747.5	-0.617276	7.80245	7.44703	7.48887	8.87481	0.696444	0.654429	0.977893	0.999799	18.6848	10.09	4.64159	-0.548243	30.6538	2.65356	19.4581	8.87481	31.3963	19.1059	19.411	8.02078	9.0755	42.4312	7.80245	7.48887	33.3842	13.3429	22.4483	21.5489	24.3571	17.1399
752	580	417	386	306	303	250	98	9	129	-0.237389	-0.385902	-0.338776	0.727626	-0.831034	0.331606	0.512386	0.0949539	1153	-0.697115	7.28108	6.29961	6.71657	8.33955	0.800201	0.692162	0.899434	27.4576	21.0293	10.01	4.61044	-0.619184	25.3168	2.76021	21.4453	8.33955	43.8832	22.9257	21.8822	7.471	10.486	41.3003	7.28108	6.73866	37.23	16.2965	25.8736	23.6669	27.7907	21.6626
839	650	489	501	402	431	377	94	10	201	-0.147887	-0.283317	-0.211077	0.914601	-0.855385	0.287234	0.323829	0.102752	628.5	-0.595407	7.94229	7.22405	7.55369	8.66239	0.686708	0.659799	0.970682	52.6241	28.9759	10.01	4.54684	-0.528823	33.3936	3.07146	29.7803	8.66239	37.5736	32.7271	34.3913	7.87837	8.56581	39.9868	7.94229	7.38032	42.4528	41.7138	30.7163	29.0959	34.8197	40.8313
1845	1662	1543	1502	1476	1514	1483	1101	1009	1263	-0.041512	-0.0785204	-0.0592705	0.930986	-0.337545	0.0585166	0.113941	0.0281845	-2468.25	-0.389894	11.4522	11.4037	11.4826	11.8452	0.484797	0.388233	0.976445	26.3564	20.8089	10	10.3259	-0.346251	24.9432	2.75053	25.219	11.8452	26.4988	26.4374	25.6168	11.5555	-13.5144	29.0612	11.4522	11.3858	43.4345	22.5079	18.8735	20.6546	16.4392	16.5981
1764	1538	1375	1398	1569	1666	1752	467	16	1537	0.179349	0.124644	0.256078	1.08553	-0.696359	0.124964	-0.164811	0.152542	-7148.75	0.635025	11.1816	12.0553	11.8547	11.543	-0.548271	0.499953	1.02773	48.8078	27.4123	10	7.7584	0.563941	44.5792	3.01519	24.3811	11.543	22.7953	24.9048	28.1037	11.1199	-19.2639	25.5956	11.1816	11.62	30.6136	32.7487	21.4251	23.8731	18.3865	23.8047
2015	1954	1838	1950	2095	2167	2291	912	14	1851	0.158425	0.128457	0.226209	1.11621	-0.533265	0.154987	-0.182085	0.105705	-9202.75	0.609307	12.4933	13.1828	12.9406	12.5019	-0.566793	0.537154	1.03732	51.8324	28.641	9.97	9.69762	0.541096	17.7819	3.05959	23.9534	12.5019	33.8768	25.2583	21.8821	12.2494	-20.9559	29.5325	12.4933	12.7956	36.5969	39.3172	21.5741	24.1228	18.3105	27.1144
2006	1964	2002	1980	1944	2075	2193	304	13	1482	-0.0451579	-0.0355919	-0.0644783	1.03007	-0.845214	0.104802	0.02079	-0.0215589	-4212.75	-0.400994	12.5571	12.9921	12.7548	12.5232	0.27497	0.471473	1.00992	23.4531	20.2788	9.97	6.72395	-0.356105	23.1872	2.72697	25.8276	12.5232	35.4042	27.7437	26.5324	12.6034	-16.1506	30.9956	12.5571	12.4805	46.1866	25.1518	18.9734	20.6537	16.817	18.4208
812	619	471	430	334	352	294	90	22	151	-0.242744	-0.366446	-0.346443	0.864111	-0.854604	0.310502	0.427912	0.0769231	997	-0.702334	7.54784	6.6494	7.0607	8.52243	0.753561	0.677155	0.952482	30.6308	21.7242	9.77	4.4814	-0.623806	26.3822	2.79028	22.2323	8.52243	36.032	23.2328	22.5481	7.78049	9.98999	42.7258	7.54784	6.93823	41.4602	11.8547	25.8483	23.8164	28.0001	19.059
1013	764	516	429	387	379	330	74	9	121	-0.238896	-0.413506	-0.340968	0.621451	-0.903141	0.447489	0.59001	0.126164	1856	-0.698615	7.54199	6.91042	7.2368	9.14179	0.838726	0.764881	0.853367	6.35934	18.6622	9.72	4.19834	-0.620492	30.0613	2.65249	18.5426	9.14179	19.908	15.8038	15.7631	8.02078	12.2893	50.8743	7.54199	7.28736	29.8186	-12.4133	22.8752	21.2337	24.5466	-0.740492
3388	3409	3290	3553	4520	5083	5375	1756	27	2589	0.19422	0.177067	0.277332	0.779327	-0.484893	0.306363	-0.0542378	0.113447	-9902.75	0.652128	15.2592	17.517	17.1939	15.0502	-0.37853	0.674133	0.920252	46.9214	26.6868	9.66	12.0645	0.579115	4.85599	2.98836	24.2458	15.0502	19.9405	24.3972	15.1582	14.873	-21.4743	32.2651	15.2592	16.5341	22.4788	32.4412	24.9755	24.2724	27.7694	30.8081
2405	2249	2191	2057	2042	2120	2109	1161	1006	1737	-0.0625606	-0.0755619	-0.0893273	0.971029	-0.483771	0.053406	0.09016	-0.00504587	-3772	-0.447021	12.7178	12.8241	12.8463	13.1018	0.448406	0.376585	0.990248	16.0782	19.266	9.64	10.5102	-0.396979	27.2825	2.6808	26.0591	13.1018	22.7642	27.3668	27.2963	12.9882	-15.5665	31.9772	12.7178	12.6868	45.1847	16.1975	19.0334	20.8188	16.6593	12.9514
773	591	399	376	345	345	312	73	8	150	-0.164964	-0.347777	-0.235421	0.748252	-0.876481	0.311927	0.468323	0.140549	1024	-0.617469	7.21765	6.78242	7.01358	8.39194	0.776572	0.678189	0.907854	15.9248	19.25	9.61	4.17934	-0.54844	36.6172	2.68005	19.7293	8.39194	39.9948	20.5691	22.4521	7.36192	10.0794	39.2611	7.21765	7.01358	26.021	21.2116	23.8861	22.4994	26.068	23.2602
1798	1594	1431	1412	1378	1373	1357	1081	1009	1186	-0.0472009	-0.100829	-0.0673923	0.952381	-0.321832	0.0466238	0.124912	0.0399195	-2171	-0.406946	11.2188	11.0712	11.1145	11.6814	0.499882	0.359917	0.983868	24.8491	20.5244	9.6	10.263	-0.361396	24.6656	2.73794	25.1671	11.6814	24.8834	26.2368	25.3127	11.2689	-12.9485	28.2923	11.2188	11.128	43.4239	25.7244	18.8524	20.5631	16.5737	18.5626
1425	1313	1209	1204	1178	1235	1247	235	23	818	-0.0867416	-0.127523	-0.123843	1.01969	-0.821021	0.107961	0.117923	0.00473348	-1395.5	-0.498453	10.6384	10.7635	10.7289	10.9502	0.490379	0.476163	1.00652	35.3383	22.9183	9.59	6.17101	-0.442666	22.8042	2.8405	24.8327	10.9502	42.8288	26.7529	25.3089	10.6531	-11.1749	26.7781	10.6384	10.5612	41.092	28.6477	20.0391	21.7746	18.2206	21.4577
1155	956	782	708	717	771	724	99	8	379	-0.0786207	-0.17734	-0.112237	0.784431	-0.896444	0.276027	0.291892	0.0764689	518.75	-0.482369	8.91274	8.97938	9.16962	9.85113	0.663347	0.651104	0.922256	21.3963	19.9482	9.57	4.62607	-0.428396	40.4609	2.71207	20.8495	9.85113	32.7998	21.1232	23.7848	9.21303	8.035	48.7861	8.91274	8.95034	30.1484	6.84227	20.5017	21.1444	20.8296	10.1556
1287	1131	971	877	645	717	682	126	12	371	-0.286945	-0.355303	-0.409641	0.713755	-0.888594	0.183718	0.493069	-0.0310592	1833.25	-0.742679	9.57194	8.80227	8.95034	10.4189	0.790016	0.568483	0.893682	10.8755	18.8394	9.56	5.0133	-0.659578	18.2469	2.66086	18.7485	10.4189	39.2033	19.2994	15.2777	9.90238	12.2388	63.9337	9.57194	8.64012	65.6112	5.68104	20.4423	20.3157	21.4743	9.88159
994	761	462	394	410	453	402	76	7	71	-0.113253	-0.348096	-0.161642	0.418478	-0.900131	0.676538	0.663388	0.191601	2140.75	-0.544734	7.33104	7.38032	7.68009	9.12981	0.872146	0.877871	0.747982	12.0464	18.9146	9.53	4.23582	-0.483819	41.4443	2.6644	18.6582	9.12981	24.3543	16.8334	19.755	7.73061	12.8881	50.0994	7.33104	7.42896	18.6836	-5.24438	22.7115	21.3656	24.5415	4.63475
1774	1543	1342	1353	1403	1480	1415	1155	1013	1113	0.017929	-0.0518064	0.0255986	0.892883	-0.251458	0.111022	0.108079	0.0822363	-2204.5	0.294717	11.0603	11.2267	11.396	11.5555	0.476336	0.480622	0.962938	53.532	29.3667	9.42	10.4921	0.261729	16.1238	3.08521	25.5663	11.5555	22.1685	26.5923	22.7901	11.0302	-13.0148	27.2592	11.0603	11.1949	37.0106	30.957	22.8925	25.0817	21.2282	25.0083
1059	1225	774	875	548	569	471	81	9	180	-0.218898	-0.423591	-0.312481	0.544355	-0.933878	0.467456	0.638796	0.00225588	3201	-0.67859	9.56466	7.78049	8.28649	10.6999	0.861233	0.776092	0.816508	87.6575	49.3176	9.38	4.32675	-0.602671	29.9951	3.6672	57.9525	10.6999	107.142	27.3112	27.9309	9.1815	14.7377	66.5882	9.56466	8.18327	85.2208	64.881	48.5503	43.0974	44.5941	57.5893
862	626	466	435	379	406	360	85	23	165	-0.150617	-0.290722	-0.214968	0.758721	-0.864217	0.35167	0.411499	0.128157	920.25	-0.599043	7.57698	7.11379	7.40472	8.55444	0.7438	0.705849	0.912068	24.1547	20.4001	9.34	4.39683	-0.532057	35.0735	2.7324	20.9375	8.55444	21.075	19.5932	21.0978	7.75286	9.72677	41.8161	7.57698	7.2368	32.6846	17.6436	24.1068	22.9277	26.4774	21.4541
758	590	487	469	434	411	417	101	11	212	-0.182039	-0.272923	-0.259817	0.988131	-0.828814	0.227687	0.27844	0.0584824	360.75	-0.6381	7.76946	7.471	7.43499	8.38721	0.652996	0.610632	0.996028	3.28737	18.6442	9.3	4.65701	-0.566745	28.9934	2.65164	19.9679	8.38721	45.4421	21.3987	21.3542	7.86761	7.11872	36.4467	7.76946	7.57117	29.697	25.4249	22.2523	22.1723	23.9233	24.025
762	550	354	303	294	293	243	54	5	69	-0.191919	-0.392405	-0.273863	0.508333	-0.901818	0.553398	0.636905	0.17193	1462.25	-0.649398	6.71657	6.24025	6.64185	8.19321	0.860382	0.821005	0.798086	1.40166	18.6743	9.24	3.77976	-0.576819	39.807	2.65307	18.8166	8.19321	27.7027	17.6509	20.2217	7.07404	11.3503	39.9302	6.71657	6.6494	18.3965	-2.00431	24.4273	22.4768	26.2589	8.34373
859	695	496	456	440	446	416	120	9	211	-0.0961326	-0.259058	-0.137212	0.787286	-0.827338	0.319355	0.366765	0.122124	809.5	-0.51578	7.697	7.46502	7.64032	8.85785	0.715807	0.68353	0.923374	10.848	18.8377	9.22	4.93242	-0.458096	34.1135	2.66078	19.532	8.85785	45.8794	20.9589	22.2656	7.91578	9.31978	42.1695	7.697	7.6059	26.1658	13.2815	22.2894	21.6453	24.156	16.9438
976	759	630	579	556	573	565	124	23	335	-0.110132	-0.200949	-0.157209	0.968317	-0.836627	0.202381	0.216346	0.0806275	32.5	-0.539709	8.33476	8.26703	8.30587	9.1218	0.60032	0.587115	0.989325	8.51107	18.7242	9.2	4.98663	-0.479334	31.8736	2.65543	21.1128	9.1218	28.932	20.9878	21.7236	8.57262	3.19125	33.6166	8.33476	8.2229	30.8321	11.6828	21.058	21.2843	22.0566	14.2861
859	614	440	398	342	359	306	88	18	106	-0.179625	-0.334783	-0.256357	0.591503	-0.856678	0.485437	0.544654	0.139364	1364	-0.635255	7.35576	6.73866	7.10719	8.49942	0.816658	0.785919	0.839432	15.59	19.2158	9.2	4.44796	-0.564229	31.7236	2.67847	19.4443	8.49942	17.6618	16.7264	17.2368	7.6059	11.0902	44.0895	7.35576	6.99319	31.8379	9.99756	23.914	22.3227	25.9518	16.2548
3624	3516	3889	3953	4127	4540	4844	988	22	4239	0.0155676	0.0658874	0.0222294	1.25274	-0.718999	-0.0275118	-0.176774	-0.0092124	-18700.2	0.281174	15.8116	16.92	16.5584	15.206	-0.561228	-0.301884	1.078	73.4702	39.7786	9.18	9.95984	0.249694	17.7128	3.41363	20.9974	15.206	18.9245	19.3304	15.0926	15.7258	-26.5429	32.9643	15.8116	16.0403	38.1436	26.4621	28.029	30.6578	27.5075	27.3768
763	489	327	293	255	245	209	64	7	75	-0.233962	-0.413295	-0.333829	0.581281	-0.869121	0.460432	0.611203	0.192593	1227	-0.693704	6.64185	5.93447	6.25732	7.87837	0.84865	0.772186	0.834569	1.73319	18.6668	9.17	4	-0.616191	33.03	2.65271	18.9881	7.87837	0.114171	11.9238	12.6799	6.88942	10.7057	36.4461	6.64185	6.34133	24.5535	10.0771	25.2505	22.9791	26.8929	17.0477
1959	1802	1651	1621	1613	1652	1676	1196	1010	1347	-0.0325203	-0.0761421	-0.0464328	0.946348	-0.336293	0.0691085	0.103491	0.0299647	-2739	-0.359425	11.747	11.8784	11.8214	12.1689	0.469498	0.410371	0.981786	13.6097	19.0339	9.16	10.6148	-0.319192	26.814	2.66999	25.741	12.1689	27.4249	27.2349	27.0254	11.819	-13.9915	29.7199	11.747	11.7277	42.9337	24.1773	18.5476	20.2577	16.1373	17.3413
5042	4830	5306	5474	5937	6416	6602	2336	20	4429	0.0323698	0.0792108	0.0462223	0.932344	-0.516356	0.122101	-0.0443213	0.00426929	-15387	0.358881	17.6239	18.7597	18.5818	16.9037	-0.353892	0.496105	0.976919	60.5376	32.6264	9.14	13.2686	0.318699	23.3404	3.19538	22.3448	16.9037	26.0627	22.3372	20.5859	17.4417	-24.8724	27.1322	17.6239	18.1074	27.6309	24.018	29.3278	28.687	33.6157	30.7692
987	803	573	559	636	672	665	137	28	283	-0.00614574	-0.173119	-0.00877282	0.713781	-0.82939	0.333333	0.330572	0.150797	676.25	-0.206243	8.23766	8.72852	8.75904	9.29477	0.691441	0.693361	0.893693	18.1075	19.4969	9.04	5.15514	-0.183172	51.1351	2.69147	20.2766	9.29477	38.2869	21.0369	25.0909	8.30587	8.77746	43.9894	8.23766	8.59975	18.66	27.7367	20.8147	21.4679	21.2531	23.2681
967	718	457	436	500	517	500	90	7	131	-0.0121816	-0.233677	-0.0173871	0.515695	-0.874652	0.545927	0.514768	0.214439	1480.25	-0.259065	7.58279	7.93701	8.02596	8.9545	0.801439	0.817294	0.80192	6.62744	18.6677	9.03	4.4814	-0.230092	58.9277	2.65275	18.7968	8.9545	19.1059	16.0254	21.0737	7.70262	11.3967	45.7528	7.58279	7.93701	14.5825	23.4203	21.5425	21.4461	22.9618	22.1385
2092	2029	2077	2236	2560	2688	2779	603	15	2033	0.127311	0.138795	0.181784	1.03392	-0.702809	0.137829	-0.155111	0.0695487	-9241.5	0.56648	13.0765	14.0593	13.9041	12.6598	-0.537297	0.516551	1.01118	78.344	42.8559	8.98	8.44836	0.503062	32.2325	3.49948	24.8626	12.6598	32.2399	26.3409	27.4285	12.7589	-20.9853	30.7566	13.0765	13.6798	31.3811	40.4456	29.5371	33.9164	23.515	31.5937
838	673	486	465	449	478	438	153	11	199	0.0328358	-0.129195	0.0468696	0.626204	-0.77266	0.445682	0.348697	0.165307	715	0.360549	7.74731	7.59436	7.81885	8.76338	0.703855	0.763851	0.855537	51.0417	28.312	8.97	5.34848	0.320221	82.522	3.04783	29.1419	8.76338	45.8327	31.6094	30.397	7.86222	8.94201	40.7767	7.74731	7.65741	26.4707	23.7426	29.2618	28.3246	33.4353	30.472
691	462	264	246	282	303	268	56	6	48	-0.00571429	-0.278008	-0.00815335	0.448276	-0.878788	0.68932	0.595855	0.286486	1182.75	-0.20127	6.26583	6.44731	6.71657	7.73061	0.841486	0.883365	0.765329	15.1262	19.1701	8.96	3.82586	-0.178781	76.335	2.67634	19.5265	7.73061	16.6818	16.6603	20.6901	6.41507	10.5754	31.3494	6.26583	6.55767	6.02039	21.6584	25.0106	23.5423	27.4914	24.6289
2010	1822	1689	1641	1655	1679	1671	1133	1006	1385	-0.0208522	-0.0586868	-0.0297731	0.942593	-0.378156	0.078203	0.088086	0.0359589	-3033.75	-0.309938	11.7951	11.8666	11.8855	12.2138	0.444941	0.427636	0.980486	22.1663	20.0676	8.92	10.425	-0.275244	24.6144	2.71747	25.5578	12.2138	24.2792	26.7516	25.8649	11.909	-14.4764	29.7728	11.7951	11.8286	41.6515	21.957	18.7168	20.4986	16.2122	16.1
1096	953	799	720	657	701	667	106	8	404	-0.140614	-0.225723	-0.200735	0.925249	-0.888772	0.196819	0.262252	0.0303398	322.5	-0.585519	8.96281	8.73726	8.88327	9.84081	0.640088	0.581687	0.974435	17.0397	19.3709	8.85	4.73262	-0.520007	31.7946	2.68565	20.6232	9.84081	46.3489	22.1957	22.9678	9.27931	6.85767	46.4601	8.96281	8.69338	39.0475	5.58645	20.6081	20.8943	21.3792	9.74309
4555	4430	4798	4683	4955	5360	5588	1343	16	3786	0.0153909	0.0552357	0.0219773	0.979992	-0.69684	0.133043	-0.0451557	-0.00486936	-13324.5	0.280107	16.7305	17.7454	17.5007	16.4236	-0.356099	0.510502	0.993286	34.6478	22.731	8.84	11.033	0.248745	16.1117	2.83273	25.7398	16.4236	21.3045	26.7765	22.9989	16.8663	-23.7074	28.8064	16.7305	17.0483	34.017	27.1674	26.5478	25.7622	29.8649	29.5961
803	548	391	345	334	344	334	120	8	135	-0.101408	-0.264129	-0.144724	0.677116	-0.781022	0.405286	0.434555	0.178571	877	-0.525025	7.01358	6.93823	7.0068	8.18327	0.75744	0.740038	0.878121	15.9279	19.2503	8.84	4.93242	-0.466328	33.4945	2.68007	19.8549	8.18327	11.3056	16.0822	17.0829	7.31238	9.57194	37.513	7.01358	6.93823	20.8802	4.66654	24.0734	22.8217	26.3963	13.0805
1786	1644	1678	1610	1619	1801	1936	394	9	1361	-0.0811856	-0.0710098	-0.115917	1.12482	-0.760341	0.0233226	0.0123153	-0.0219245	-3939.25	-0.487584	11.7204	12.4634	12.1667	11.8023	0.230931	0.28571	1.03999	0.751985	18.692	8.83	7.33104	-0.433005	17.0951	2.6539	26.3494	11.8023	31.3747	28.2733	25.0962	11.8831	-15.7932	29.1457	11.7204	11.7422	41.7712	19.3804	18.516	20.0883	16.403	14.706
735	497	278	244	274	300	267	53	7	57	-0.0817121	-0.356071	-0.116588	0.5	-0.89336	0.610922	0.61626	0.271775	1300.25	-0.488522	6.2488	6.43928	6.69433	7.9211	0.850984	0.848519	0.793701	9.19967	18.7527	8.79	3.75629	-0.433939	53.684	2.65677	19.0168	7.9211	15.0462	15.5275	20.3088	6.52652	10.9146	33.3859	6.2488	6.49507	6.88705	6.52562	24.8895	22.9578	26.8814	14.7109
1134	1051	833	750	688	726	696	146	27	449	-0.127199	-0.239387	-0.181587	0.882171	-0.861085	0.179159	0.297531	0.0328012	532	-0.566277	9.0856	8.8621	8.98764	10.1672	0.667591	0.563741	0.959071	11.7354	18.8935	8.75	5.26564	-0.502915	27.1099	2.6634	19.9075	10.1672	57.618	22.1871	21.638	9.40911	8.10284	50.2352	9.0856	8.82801	39.3484	5.24126	20.1949	20.471	20.8176	9.06868
2507	2336	2153	2080	2011	2054	1866	1227	1009	1721	-0.014848	-0.0555807	-0.0212008	0.987081	-0.474743	0.096825	0.0620596	0.0326856	-4163.25	-0.276769	12.765	12.3113	12.7116	13.2686	0.395916	0.459194	0.995675	64.0325	34.4141	8.73	10.7057	-0.245785	26.1073	3.25271	25.6846	13.2686	21.2962	26.6933	26.2368	12.9126	-16.0871	31.6556	12.765	12.6223	48.387	20.9657	24.745	27.3582	22.7576	20.5481
1146	1138	1055	952	619	652	474	93	10	197	-0.360413	-0.392901	-0.514527	0.570565	-0.918278	0.431457	0.601689	-0.124733	2754.25	-0.801314	9.83737	7.79697	8.67127	10.4403	0.844223	0.755636	0.829408	80.5693	44.3304	8.72	4.53065	-0.71165	18.6356	3.53916	50.8171	10.4403	70.9923	45.3668	45.4474	10.1801	14.0174	70.5364	9.83737	8.52243	83.4276	5.39034	41.9464	38.9804	46.5406	29.7757
779	584	361	310	285	269	247	62	7	92	-0.244828	-0.454545	-0.349356	0.625571	-0.893836	0.40836	0.619972	0.160465	1480.25	-0.704297	6.7679	6.27431	6.45531	8.35868	0.852689	0.741904	0.855248	19.6414	19.6956	8.69	3.95789	-0.625586	32.7431	2.70058	19.8735	8.35868	34.9578	20.1367	21.0666	7.12037	11.3967	40.4923	6.7679	6.58084	22.1565	-1.38454	25.3218	22.8079	26.5942	9.05139
1047	869	731	641	620	642	630	142	11	327	-0.102564	-0.187158	-0.146414	0.838655	-0.836594	0.290672	0.270468	0.0579897	432	-0.527061	8.62222	8.57262	8.62671	9.54274	0.646703	0.662422	0.943035	4.14085	18.6409	8.65	5.2171	-0.468093	30.0662	2.65148	19.842	9.54274	39.0906	20.601	20.8174	9.00822	7.55953	46.2578	8.62222	8.52702	32.0724	-0.929103	20.524	20.8326	21.241	5.12059
2814	2625	2795	2471	2579	2765	2860	632	20	2597	0.0663103	0.0974729	0.0946844	1.2594	-0.759238	0.102781	-0.209932	0.0358744	-13519.8	0.455784	13.5194	14.1946	14.0356	13.7946	-0.594328	0.468423	1.07991	14.8501	19.1438	8.63	8.58168	0.404756	28.9402	2.67512	28.1916	13.7946	19.1628	30.3331	30.9268	14.0862	-23.8226	32.946	13.5194	13.7136	40.2784	11.2739	20.1113	21.4676	19.1259	11.7391
1102	996	639	624	712	806	807	133	10	333	-0.0256822	-0.24267	-0.0366616	0.751236	-0.866466	0.291489	0.371901	0.144292	1092.5	-0.332203	8.54532	9.31018	9.30633	9.98665	0.719133	0.663042	0.909059	8.50596	18.724	8.6	5.10447	-0.295038	43.8539	2.65542	19.1571	9.98665	54.1918	21.2714	24.4889	8.61325	10.2993	50.1955	8.54532	8.92949	20.0395	27.3055	19.9858	20.5217	20.2438	22.2557
1855	1618	1465	1420	1364	1370	1343	1071	1008	1175	-0.0531991	-0.102555	-0.0759567	0.952923	-0.338072	0.0569823	0.126349	0.0396591	-2108.5	-0.423502	11.2399	11.033	11.1064	11.7398	0.501792	0.38481	0.984055	22.4474	20.1125	8.51	10.2313	-0.376098	24.607	2.7195	25.2119	11.7398	21.022	25.9621	24.9923	11.3574	-12.823	28.7182	11.2399	11.0902	45.1621	21.6839	18.7537	20.4366	16.4958	16.1554
1307	1160	1034	973	981	1033	1032	158	10	692	-0.0319361	-0.0892019	-0.0455951	0.914433	-0.863793	0.167268	0.133366	0.0481013	-1053.5	-0.35725	9.90918	10.1055	10.1088	10.5072	0.510915	0.550983	0.970623	26.7782	20.892	8.47	5.40612	-0.317269	38.2213	2.75419	24.6621	10.5072	40.3326	26.478	28.756	10.1121	-10.1752	24.7806	9.90918	9.93626	35.3436	15.5552	19.7281	21.0874	18.5749	14.0297
1088	921	733	652	713	796	709	145	10	326	-0.0216028	-0.134935	-0.0308396	0.880342	-0.842562	0.365759	0.196881	0.0995086	140	-0.313595	8.67127	8.91693	9.26768	9.72941	0.581748	0.715152	0.958408	32.9989	22.3005	8.41	5.25359	-0.278507	42.9194	2.81474	23.2769	9.72941	41.0542	24.8649	27.8572	9.01643	5.19249	40.9702	8.67127	8.93367	23.3824	2.64264	21.7829	22.492	22.5325	8.64228
1180	977	857	824	874	960	854	224	11	548	-0.0325301	-0.0977528	-0.046441	0.938979	-0.770727	0.188749	0.128827	0.0727617	-815.75	-0.359446	9.3751	9.48752	9.86485	9.92274	0.505052	0.573625	0.979231	62.2937	33.5113	8.33	6.07318	-0.319224	30.5197	3.22401	28.0101	9.92274	31.6782	30.5013	31.4634	9.49861	-9.3437	21.8791	9.3751	9.56101	28.8925	21.6493	28.6633	30.3787	30.5984	27.0497
5019	4997	5383	5459	5729	6050	6381	1945	63	5311	0.0486878	0.0857195	0.0695236	1.11476	-0.610766	0.0554024	-0.139339	0.00860997	-22560.8	0.411191	17.6078	18.548	18.2215	17.0963	-0.51843	0.38122	1.03688	46.5019	26.5297	8.33	12.4826	0.365152	15.5614	2.98248	23.6228	17.0963	21.4445	23.6371	19.1463	17.5257	-28.2565	28.7058	17.6078	17.8934	31.9388	25.3813	28.4833	27.472	32.3666	30.5559
798	562	386	336	289	277	252	72	7	119	-0.219589	-0.38937	-0.313362	0.688259	-0.871886	0.349727	0.535519	0.150248	1179	-0.679227	6.95205	6.31636	6.51868	8.25237	0.812067	0.704546	0.882912	7.14971	18.6802	8.25	4.16017	-0.603305	32.0572	2.65335	19.0408	8.25237	18.9721	16.3683	16.9633	7.28108	10.5642	39.7801	6.95205	6.61149	28.1835	1.38251	24.5303	22.3902	26.1519	10.6384
771	600	383	353	410	440	411	92	25	129	-0.00130719	-0.221996	-0.00186562	0.570681	-0.846667	0.495108	0.466993	0.201668	1077.75	-0.123105	7.06738	7.43499	7.6059	8.43433	0.775836	0.791103	0.829464	14.6516	19.1253	8.22	4.51436	-0.10934	68.2557	2.67425	19.5634	8.43433	44.2362	20.8319	24.8416	7.26217	10.2527	38.7948	7.06738	7.42896	10.7749	15.8517	22.8373	22.3668	24.8722	19.1061
901	696	472	427	415	434	396	111	40	150	-0.105386	-0.29128	-0.150416	0.615183	-0.840517	0.43609	0.495166	0.152223	1336	-0.531821	7.53025	7.34342	7.57117	8.8621	0.791135	0.758331	0.850488	4.55905	18.6416	8.19	4.8059	-0.472347	34.6028	2.65152	18.8769	8.8621	32.3404	18.4832	19.8441	7.78599	11.0138	45.4466	7.53025	7.45904	24.481	9.50731	22.4872	21.543	24.4008	14.7167
4584	4653	4884	5190	5935	6456	6744	2073	1017	4289	0.0652632	0.0893434	0.093192	0.960654	-0.554481	0.129579	-0.0694	0.0191786	-15962.2	0.453377	17.3137	18.8932	18.6204	16.6947	-0.410948	0.506032	0.986709	61.8814	33.3011	8.14	12.7507	0.402614	14.9185	3.21726	22.1379	16.6947	17.8281	20.8997	15.7089	16.9665	-25.1786	29.0365	17.3137	18.1053	23.283	23.4241	29.4271	28.6299	33.7091	30.5064
7218	7094	7531	7532	7712	8044	8202	3206	88	3388	-0.00272951	0.027153	-0.00389763	0.680507	-0.548069	0.377091	0.163809	-0.0118912	-3201.5	-0.157374	19.6021	20.1669	20.0366	19.2146	0.547158	0.722463	0.879585	63.8185	34.3016	8.13	14.7453	-0.139753	80.2657	3.24916	26.2014	19.2146	44.4578	28.3375	28.609	19.6013	-14.7384	15.5071	19.6021	19.7571	25.7158	28.7182	34.4278	33.9266	40.4772	38.745
1099	879	781	723	714	729	727	164	26	449	-0.0713306	-0.12982	-0.10183	0.884786	-0.813424	0.202487	0.189445	0.0641102	-284	-0.466973	8.97524	8.99176	9	9.57921	0.57433	0.587217	0.960018	13.6758	19.0394	8.06	5.4737	-0.414723	30.9128	2.67024	23.8237	9.57921	28.2202	24.6322	25.309	9.2091	-6.57314	22.8467	8.97524	8.93784	32.4652	12.4605	20.1072	20.9724	19.9667	13.1554
817	559	350	343	415	453	411	74	8	86	0.00849858	-0.221858	0.0121286	0.469101	-0.867621	0.61086	0.539945	0.252536	1242.5	0.229758	7	7.43499	7.68009	8.23766	0.814298	0.848491	0.777002	43.8856	25.5849	8.05	4.19834	0.204071	102.08	2.94665	26.364	8.23766	10.7902	26.72	19.8099	7.0473	10.7506	38.0818	7	7.45904	8.32309	32.2409	27.4905	27.199	31.1367	33.3026
7714	7476	7744	7229	7592	8280	8412	1557	69	1899	0.0168846	0.0344828	0.0241106	0.447191	-0.791734	0.616712	0.352143	0.00756119	8351.25	0.288892	19.3357	20.3376	20.2307	19.5534	0.706165	0.851192	0.764712	43.1002	25.3131	8.02	11.5903	0.256545	16.8422	2.93617	26.487	19.5534	55.5167	28.3666	25.1122	19.7843	20.2885	82.5039	19.3357	19.6541	23.3076	47.8174	34.917	34.1345	41.0254	48.3531
5798	5854	6382	6477	6701	7131	7565	2323	21	5323	0.013525	0.0566433	0.0193131	1.02699	-0.603177	0.103872	-0.0699078	-0.0162825	-19797.5	0.268298	18.6405	19.6307	19.2479	18.0226	-0.411948	0.470074	1.00892	35.5708	22.9823	8.01	13.2439	0.238257	28.1319	2.84314	25.8086	18.0226	23.9591	27.0906	27.2228	18.5489	-27.0523	22.9861	18.6405	18.853	29.3298	25.0004	32.521	29.6537	35.0083	32.4133
1913	1737	1568	1569	1513	1531	1502	1125	1007	1285	-0.0165316	-0.0676091	-0.0236039	0.891892	-0.352332	0.082798	0.124272	0.0447761	-2377	-0.286854	11.62	11.4522	11.5255	12.0208	0.499027	0.435853	0.962581	35.6711	23.0101	8.01	10.4004	-0.254745	24.1356	2.84428	24.9678	12.0208	26.3517	26.0714	24.9685	11.6176	-13.3458	29.3787	11.62	11.4801	45.9613	28.4097	19.5411	21.4557	17.0782	20.457
1731	1493	1287	1257	1250	1263	1196	1049	1007	1061	-0.0341503	-0.107978	-0.0487582	0.919301	-0.297388	0.0623067	0.149346	0.0651898	-1666.25	-0.365328	10.7922	10.6148	10.8094	11.4293	0.530556	0.396441	0.972343	33.8467	22.5188	7.96	10.1607	-0.324438	23.4907	2.8239	24.8719	11.4293	21.6418	25.5148	24.1506	10.8774	-11.8553	27.3319	10.7922	10.7722	40.0876	23.7825	19.7074	21.3686	17.9128	18.4687
1042	849	699	616	652	785	882	269	11	453	-0.117506	-0.211991	-0.167741	0.916667	-0.683157	0.0985075	0.253137	0.065508	-11.75	-0.551501	8.50864	9.59009	9.22479	9.46897	0.632584	0.461838	0.971413	48.4747	27.2819	7.8	6.45531	-0.489801	18.4589	3.01041	26.5937	9.46897	35.3397	28.7186	26.0916	8.87481	-2.27342	26.2638	8.50864	8.67127	24.7527	0.498395	25.7246	26.1941	28.2825	11.7218
867	666	465	440	511	528	533	110	8	211	-0.0119695	-0.189286	-0.0170845	0.640969	-0.834835	0.365414	0.39185	0.173701	806.25	-0.257554	7.6059	8.10791	8.08248	8.73289	0.731767	0.714927	0.862209	1.33635	18.6759	7.78	4.79142	-0.228749	53.6738	2.65314	19.3856	8.73289	33.5125	19.317	23.7078	7.74731	9.30729	40.7083	7.6059	7.99479	14.0229	21.1674	21.4395	21.7204	22.5337	20.494
860	605	439	412	399	417	372	97	12	136	-0.111392	-0.26569	-0.158982	0.646724	-0.839669	0.441478	0.454327	0.159406	1050.25	-0.54173	7.44102	7.19197	7.471	8.45769	0.768758	0.761441	0.864781	19.5097	19.6777	7.61	4.5947	-0.481155	36.6411	2.69976	20.1312	8.45769	13.9373	17.0686	18.9178	7.60014	10.1648	41.6121	7.44102	7.36192	24.0752	19.4543	23.3314	22.6462	25.5604	21.8265
897	670	535	472	445	456	429	90	12	265	-0.155508	-0.262959	-0.221962	0.905371	-0.865672	0.192073	0.308594	0.0924512	437.5	-0.605471	7.78599	7.54199	7.697	8.75034	0.675765	0.576973	0.967406	8.4133	18.7205	7.6	4.4814	-0.537754	33.4955	2.65525	19.8992	8.75034	24.9984	18.7174	19.7961	8.11804	7.59147	39.6267	7.78599	7.63461	28.4536	2.24769	22.1641	21.7207	23.9543	9.49363
2022	1790	1655	1606	1601	1621	1630	1088	1011	1375	-0.0317955	-0.0708944	-0.0453979	0.976819	-0.392179	0.0607923	0.0825522	0.0384895	-3077.5	-0.356735	11.7107	11.7687	11.747	12.1418	0.435421	0.393203	0.992213	17.5686	19.4321	7.58	10.2851	-0.316803	24.2439	2.68848	25.7553	12.1418	20.5231	26.7321	25.7319	11.8286	-14.5456	29.4809	11.7107	11.6985	42.6488	21.7282	18.5937	20.3302	16.1423	15.9112
1142	1003	792	853	890	926	929	268	11	527	0.148387	0.0313858	0.211848	0.865169	-0.732802	0.339185	0.0409964	0.164997	-1400.25	0.596131	9.48381	9.7575	9.74699	10.01	0.344812	0.697395	0.95287	101.596	60.4141	7.56	6.44731	0.529418	69.6368	3.92385	42.2148	10.01	45.984	46.3507	45.6094	9.25213	-11.1876	18.7508	9.48381	9.619	30.6443	51.6664	54.5662	56.2189	67.1975	70.5261
884	687	508	481	501	560	532	81	6	228	-0.0785563	-0.225691	-0.112127	0.735023	-0.882096	0.311178	0.365805	0.129392	736.5	-0.482211	7.83517	8.10284	8.24257	8.82373	0.715182	0.677646	0.902472	17.316	19.4025	7.5	4.32675	-0.428279	44.8566	2.68711	20.1296	8.82373	34.9105	20.4559	23.8487	7.97911	9.03076	41.9754	7.83517	7.94229	21.907	20.7286	21.9297	21.9803	23.3973	20.9033
1042	730	569	494	466	494	466	141	9	202	-0.117878	-0.238338	-0.168259	0.608018	-0.806849	0.379416	0.455633	0.134272	1160.25	-0.552069	7.90513	7.75286	7.90513	9.00411	0.769494	0.723945	0.847173	7.42128	18.6877	7.49	5.20483	-0.490318	28.6301	2.6537	19.0638	9.00411	1.83296	12.5081	11.8175	8.28649	10.5079	48.2287	7.90513	7.75286	29.2646	-2.20433	21.9078	21.3984	23.6223	6.10027
778	536	369	344	308	332	287	82	25	136	-0.140649	-0.316953	-0.200714	0.76259	-0.847015	0.342995	0.433155	0.177258	852.5	-0.585499	7.0068	6.5962	6.92436	8.1231	0.756626	0.699997	0.913616	23.1415	20.2263	7.47	4.34448	-0.520051	36.7929	2.72462	20.8142	8.1231	15.5643	18.4601	20.3582	7.17258	9.48196	35.9916	7.0068	6.75331	25.9296	19.0484	25.2352	23.5184	27.566	23.1485
3700	3471	3505	3279	3342	3605	3821	776	15	2925	0.042088	0.0469522	0.0600982	1.07029	-0.776433	0.13179	-0.0807733	0.0346347	-11437	0.3917	14.8564	15.6336	15.3333	15.1409	-0.432271	0.508894	1.0229	13.5248	19.0268	7.37	9.1894	0.347845	22.2273	2.66966	27.9539	15.1409	18.7966	29.9476	28.7067	15.1902	-22.5305	32.1662	14.8564	14.951	42.6512	21.5221	22.2343	23.4279	22.434	20.6257
1020	859	652	627	594	647	625	99	7	350	-0.152962	-0.284006	-0.218347	0.832985	-0.88475	0.155609	0.36566	0.0695683	757.75	-0.602165	8.55899	8.54988	8.64904	9.506	0.715087	0.537871	0.940905	21.6211	19.9825	7.34	4.62607	-0.534804	31.9194	2.71363	20.6542	9.506	43.8521	22.027	22.8233	8.67127	9.11679	47.6188	8.55899	8.40612	33.3299	23.1828	21.3884	21.4854	22.6194	21.7371
781	630	431	384	301	308	264	69	9	131	-0.240288	-0.409396	-0.34292	0.613636	-0.890476	0.336709	0.590909	0.0959622	1445.75	-0.699945	7.26848	6.41507	6.75331	8.57262	0.839151	0.695694	0.849775	11.0149	18.8477	7.29	4.10157	-0.621695	31.1928	2.66125	19.0076	8.57262	51.5819	20.9191	21.4679	7.55369	11.3074	44.2097	7.26848	6.70176	37.9771	6.3132	24.4073	22.0207	25.6327	13.5819
930	741	579	536	520	546	535	150	31	314	-0.0924528	-0.212766	-0.131969	0.962578	-0.797571	0.210063	0.230897	0.0984819	128.25	-0.509125	8.1231	8.11804	8.1733	9.04911	0.613488	0.594452	0.987367	7.6054	18.6931	7.23	5.31329	-0.452175	30.1236	2.65396	20.5818	9.04911	37.3265	21.3053	21.5786	8.33476	5.04296	35.613	8.1231	8.04145	28.6841	14.046	21.363	21.35	22.6634	16.2595
1173	1081	871	839	797	821	814	182	29	539	-0.100442	-0.2058	-0.143393	1.01826	-0.831637	0.138289	0.197121	0.0394265	-236.25	-0.52341	9.43164	9.33702	9.3637	10.263	0.581984	0.517126	1.00605	24.0071	20.3742	7.21	5.66705	-0.464842	25.7308	2.73124	23.9144	10.263	54.3216	25.902	25.2624	9.55006	-6.18193	25.5082	9.43164	9.27156	38.2433	22.0361	20.2608	21.018	20.3388	19.3119
1927	1809	1845	1759	1735	1870	1890	341	30	1373	-0.0465116	-0.0366762	-0.0664105	1.00952	-0.811498	0.100851	0.0319452	-0.011236	-3748	-0.40496	12.0713	12.3639	12.3201	12.1846	0.317299	0.465472	1.00316	30.4521	21.6827	7.21	6.98637	-0.359628	21.4077	2.7885	25.3417	12.1846	31.1561	26.9143	25.0386	12.2649	-15.5334	30.3709	12.0713	12.0162	44.6646	18.2171	19.0796	20.9647	16.4853	14.0621
1968	1785	1624	1595	1678	1733	1728	1108	1027	1258	-0.00806952	-0.0552764	-0.0115217	0.879224	-0.379272	0.119048	0.119122	0.0466686	-2339	-0.22586	11.6839	12	12.0116	12.1305	0.492037	0.491934	0.958002	23.3858	20.2674	7.2	10.3478	-0.200578	23.0277	2.72646	25.2729	12.1305	25.1239	26.4079	24.9954	11.7543	-13.2743	29.8929	11.6839	11.8831	37.2451	24.2882	18.7614	20.5297	16.3083	17.5359
2431	2381	2097	1958	1779	1803	1747	1141	1008	1444	-0.0870918	-0.149686	-0.124353	0.897217	-0.52079	0.098908	0.202222	-0.000238493	-1207.25	-0.499136	12.5104	12.0438	12.1712	13.3532	0.586961	0.462463	0.964493	17.4766	19.4213	7.12	10.4495	-0.44326	27.4694	2.68798	24.831	13.3532	27.4289	25.9641	25.8257	12.7997	-10.6479	34.5098	12.5104	12.1169	55.6862	14.9562	18.7135	21.0444	14.767	10.7184
1582	1466	1410	1346	1296	1338	1356	238	16	897	-0.0530246	-0.0724214	-0.0757071	0.925079	-0.837653	0.171363	0.111027	0.00529101	-1611.75	-0.423037	11.0412	11.0684	11.0193	11.36	0.480628	0.555442	0.974375	26.4461	20.8264	7.11	6.19715	-0.375687	26.245	2.7513	24.9191	11.36	38.3123	26.7143	26.2988	11.2135	-11.7246	28.868	11.0412	10.9027	44.2118	18.3539	19.0201	20.7047	16.8741	14.4444
7849	8115	8701	8594	9146	9691	9843	2322	21	4505	0.00514521	0.0399858	0.00734718	0.764646	-0.713863	0.322353	0.0938869	-0.0223841	-9014.5	0.194405	20.4832	21.431	21.3201	20.0954	0.454501	0.685662	0.914436	82.1498	45.4041	7.1	13.242	0.172637	32.191	3.56751	25.6081	20.0954	34.0179	27.4081	28.5433	20.5679	-20.812	7.13948	20.4832	20.9127	13.9087	34.5818	40.206	39.8811	48.2616	47.9141
1797	1728	1594	1673	1503	1598	1538	258	9	1013	-0.0799458	-0.119896	-0.114146	0.982327	-0.850694	0.145508	0.128674	-0.00520259	-1549.25	-0.485088	11.8713	11.543	11.6912	12	0.504852	0.525972	0.994074	74.7762	40.5827	7.09	6.3661	-0.43079	22.0174	3.43648	30.1948	12	38.0779	33.2233	32.3378	11.6814	-11.5711	30.744	11.8713	11.4548	55.1148	38.6486	30.5461	32.896	31.8973	37.12
803	694	450	400	342	330	314	88	9	165	-0.208054	-0.403438	-0.29693	0.772881	-0.873199	0.282609	0.505423	0.0990991	1336.5	-0.667142	7.36806	6.79688	6.91042	8.8536	0.79656	0.656239	0.917707	9.09367	18.748	7.07	4.44796	-0.59255	29.3668	2.65655	18.9846	8.8536	65.3575	21.7266	21.811	7.66309	11.0151	44.3901	7.36806	6.99319	32.3156	5.39063	23.6127	21.6058	25.1342	12.5698
1980	1809	1633	1607	1670	1744	1712	1123	1008	1311	-0.00802469	-0.0591335	-0.0114577	0.878656	-0.379215	0.101439	0.123254	0.0468408	-2419	-0.225441	11.7131	11.9628	12.0369	12.1846	0.497661	0.466375	0.957796	31.1509	21.8466	7.04	10.3943	-0.200206	23.274	2.79551	25.0629	12.1846	25.9997	26.178	24.8178	11.7759	-13.4239	29.881	11.7131	11.8642	38.4755	24.6877	19.1125	21.0201	16.4773	17.8952
1755	1525	1335	1286	1326	1359	1324	1053	1005	1094	-0.0171429	-0.0834813	-0.024476	0.897674	-0.309508	0.0822148	0.136787	0.0656168	-1863	-0.290344	10.8746	10.9807	11.0766	11.5104	0.515247	0.434827	0.964657	21.2923	19.9325	7.02	10.1736	-0.257846	22.8157	2.71136	25.135	11.5104	22.4099	25.9766	24.4477	11.011	-12.3047	27.6203	10.8746	10.9862	36.966	20.4896	18.7358	20.3841	16.5488	15.4849
716	488	341	301	274	266	225	55	7	107	-0.242259	-0.402299	-0.345676	0.692308	-0.887295	0.320635	0.544304	0.150685	1029.75	-0.701816	6.70176	6.0822	6.43123	7.87299	0.816483	0.684442	0.88464	9.96819	18.7894	7.01	3.80295	-0.62339	35.0879	2.6585	19.2757	7.87299	18.671	16.6658	18.1147	6.98637	10.0982	35.8005	6.70176	6.49507	22.2144	5.97108	24.9148	23.0606	27.0031	14.4377
806	638	438	411	363	385	360	98	8	191	-0.182186	-0.356004	-0.260012	0.805281	-0.846395	0.226721	0.446712	0.11738	975	-0.63826	7.43499	7.11379	7.27479	8.60875	0.764438	0.609767	0.930356	9.75345	18.7786	6.94	4.61044	-0.566898	29.5274	2.658	19.3148	8.60875	45.1331	20.6453	20.7088	7.59436	9.91596	40.9213	7.43499	7.13349	30.4955	19.4322	23.2981	21.9354	25.3069	21.616
1297	1175	1060	1001	905	923	896	192	10	640	-0.0674723	-0.118515	-0.0963297	0.948164	-0.836596	0.182631	0.144666	0.0237163	-803.5	-0.458409	10.0033	9.64057	9.73645	10.5523	0.524956	0.567359	0.982414	33.2315	22.3598	6.94	5.769	-0.407107	28.3541	2.81723	24.64	10.5523	44.8498	26.5778	26.7278	10.1961	-9.2967	26.0096	10.0033	9.67274	46.0326	16.3487	20.7134	21.7583	20.5371	16.0407
2223	2090	2254	2190	2259	2447	2575	595	13	1804	0.0197869	0.0574972	0.0282531	1.1113	-0.715311	0.130393	-0.109881	0.00661084	-7611.25	0.304571	12.9862	13.7065	13.4755	12.7854	-0.478969	0.507089	1.0358	31.2927	21.8803	6.89	8.41083	0.270474	28.6403	2.79695	25.7707	12.7854	25.8528	27.1723	27.4431	13.1115	-19.6706	31.3622	12.9862	13.1212	41.2338	22.006	19.5735	21.1756	17.8512	17.3836
985	889	709	584	473	517	434	72	13	109	-0.267203	-0.368745	-0.38142	0.468293	-0.91901	0.579961	0.644773	-0.00817632	2385.75	-0.725217	8.35868	7.57117	8.02596	9.6154	0.863911	0.833937	0.776555	3.87971	18.6412	6.86	4.16017	-0.644091	28.4692	2.6515	18.2199	9.6154	61.1366	20.8852	20.6513	8.91693	13.3621	60.7516	8.35868	7.79149	45.2643	-16.3417	21.8068	20.7702	23.4701	-4.67645
1715	1524	1362	1425	2137	2565	2693	508	31	1288	0.248137	0.194716	0.354298	0.798762	-0.666667	0.274162	-0.0846847	0.186866	-5235.25	0.707603	11.2531	13.9127	13.6887	11.5079	-0.439139	0.649634	0.927839	43.5489	25.4677	6.84	7.97911	0.628392	42.3546	2.94214	24.7838	11.5079	27.2033	25.8805	28.7801	11.0847	-17.3638	25.7148	11.2531	12.8806	17.554	39.4616	20.3265	22.7854	16.7507	26.015
1871	2003	2196	2100	1696	1813	1420	164	12	422	-0.195753	-0.151149	-0.279502	0.408937	-0.918123	0.555556	0.536632	-0.134884	4066.25	-0.653826	12.8058	11.2399	12.1936	12.6055	0.812629	0.822071	0.742253	117.993	75.6569	6.8	5.4737	-0.580634	19.9194	4.22944	94.1269	12.6055	51.4305	102.323	114.69	12.998	15.9612	86.4785	12.8058	11.9255	73.805	19.2931	61.6345	63.8957	76.4126	62.9441
3841	3679	3725	3555	3512	3450	3351	1114	21	2853	0.0817207	0.0878889	0.116691	0.966272	-0.6972	0.211987	-0.0708423	0.0496843	-11186.8	0.488666	15.2621	14.9644	15.1103	15.4375	-0.413775	0.596261	0.988628	67.1352	36.0913	6.69	10.3664	0.433954	13.8569	3.30472	23.1649	15.4375	19.1708	22.6638	17.3008	15.5016	-22.365	31.7243	15.2621	15.2003	46.4363	23.6387	25.6571	28.6509	22.9307	22.2404
737	517	319	337	389	403	390	84	10	97	0.0686131	-0.171008	0.0979184	0.472678	-0.837524	0.580994	0.498551	0.267088	1017.75	0.460916	6.95894	7.30614	7.38644	8.02596	0.792933	0.834431	0.778972	51.5863	28.538	6.68	4.37952	0.409389	114.712	3.05591	29.5865	8.02596	23.3681	32.5783	16.3176	6.83277	10.0588	34.2109	6.95894	7.29989	10.4025	52.341	30.5702	30.1856	35.3077	45.8619
748	540	353	317	278	302	271	74	13	130	-0.20068	-0.393548	-0.286363	0.889362	-0.862963	0.287671	0.441923	0.164002	907.75	-0.659132	6.81846	6.47127	6.70917	8.14325	0.761697	0.660134	0.96167	4.82111	18.6428	6.5	4.19834	-0.585466	33.1205	2.65157	19.2502	8.14325	29.0002	18.4591	19.4289	7.06738	9.68253	35.5092	6.81846	6.52652	25.6644	9.95926	24.7298	22.5363	26.3357	16.5323
1287	1108	1006	946	957	971	968	182	11	665	-0.0567227	-0.104686	-0.0809818	0.994432	-0.83574	0.149072	0.107446	0.0412199	-1193.25	-0.432642	9.81666	9.89217	9.90238	10.3478	0.475405	0.530232	0.998141	24.1279	20.3954	6.43	5.66705	-0.384225	30.8149	2.73219	24.7485	10.3478	35.0491	26.3518	27.1076	10.02	-10.6066	23.9132	9.81666	9.85456	34.6493	15.4642	19.6042	20.9699	18.3864	13.8271
819	577	416	400	433	440	409	119	27	194	-0.0387016	-0.199584	-0.0552364	0.794805	-0.793761	0.329879	0.306908	0.182711	454.25	-0.380839	7.36806	7.42291	7.6059	8.32515	0.674532	0.690958	0.926304	23.8539	20.3476	6.35	4.91868	-0.338254	43.3235	2.73005	21.2734	8.32515	17.3713	19.4926	22.6838	7.46502	7.68714	34.2766	7.36806	7.56535	16.5607	26.1093	23.2951	23.2569	25.326	25.4925
1799	1605	1398	1336	1304	1321	1269	1083	1012	1141	-0.047976	-0.116522	-0.0684988	0.95748	-0.325234	0.0535048	0.137894	0.0465473	-1899.25	-0.409161	11.0138	10.8265	10.9724	11.7082	0.516633	0.376817	0.985621	23.6869	20.3188	6.34	10.2693	-0.363364	24.7396	2.72876	25.0927	11.7082	25.9161	26.2136	25.3095	11.1816	-12.384	28.2904	11.0138	10.9251	42.7148	18.6068	18.8596	20.498	16.7485	14.5019
739	525	336	321	340	369	318	80	7	100	-0.0338462	-0.25149	-0.0483005	0.56051	-0.847619	0.516908	0.49786	0.22087	1042.5	-0.364181	6.84702	6.82562	7.17258	8.06714	0.792567	0.802548	0.824507	29.2293	21.4064	6.33	4.30887	-0.323472	54.0927	2.77661	21.886	8.06714	26.1092	21.6955	25.8736	6.95205	10.1397	35.5777	6.84702	6.97953	14.275	26.0046	25.4939	24.4006	28.3585	27.7817
796	576	397	330	271	259	226	69	8	95	-0.299509	-0.458228	-0.427399	0.67757	-0.880208	0.385113	0.597781	0.119734	1409.25	-0.75326	6.91042	6.0912	6.37431	8.32034	0.842392	0.72755	0.878317	12.2955	18.9322	6.32	4.10157	-0.669068	26.9794	2.66522	19.1204	8.32034	25.3829	17.6761	16.7428	7.3496	11.2115	42.1196	6.91042	6.47127	31.0217	-10.308	25.0788	22.4279	26.0409	2.07033
858	619	466	422	412	422	397	99	13	180	-0.0951821	-0.233068	-0.135852	0.737662	-0.840065	0.362832	0.370986	0.142989	748.75	-0.514069	7.50074	7.3496	7.50074	8.52243	0.718542	0.713239	0.903551	5.83312	18.6532	6.3	4.62607	-0.456582	38.1984	2.65207	19.4279	8.52243	19.8592	17.1239	19.3436	7.75286	9.08055	40.1892	7.50074	7.44102	23.9638	9.85973	22.5326	21.9871	24.4734	15.0028
1903	1729	1557	1539	1549	1584	1574	1139	1008	1318	-0.0143322	-0.0666255	-0.0204636	0.939194	-0.341238	0.0688803	0.0977778	0.0462481	-2770.75	-0.273523	11.5455	11.6324	11.657	12.0023	0.460695	0.409919	0.979306	26.2922	20.7963	6.27	10.4434	-0.242906	24.2278	2.74998	25.31	12.0023	26.6516	26.577	25.5555	11.5903	-14.0453	28.9058	11.5455	11.5705	41.2307	25.7881	18.8513	20.6609	16.3396	18.4207
796	641	463	684	1041	1084	1101	505	14	534	0.00856531	-0.152878	0.0122257	2.14862	-0.212168	-0.0626866	-0.22444	0.155495	-3070.25	0.230369	8.81087	10.3259	10.2725	8.62222	-0.607716	-0.397245	1.29039	99.1045	58.3052	6.25	7.96337	0.204604	31.9966	3.87766	37.0801	8.62222	49.8953	39.798	41.7046	7.73619	-14.5342	5.15738	8.81087	10.1348	8.76731	145.572	50.4363	58.9147	32.8183	58.7593
923	731	485	446	515	529	493	113	19	204	-0.00726895	-0.209264	-0.0103755	0.698745	-0.845417	0.40176	0.37277	0.18178	907.5	-0.218107	7.64032	7.89979	8.08758	9.00822	0.719692	0.737885	0.887373	17.7877	19.4581	6.21	4.83459	-0.193712	55.6493	2.68968	20.0276	9.00822	36.4468	20.5165	24.8828	7.85683	9.68164	42.5873	7.64032	8.01559	14.5355	13.5033	21.8188	21.7774	23.3066	16.4199
1067	895	750	696	707	723	723	133	8	452	-0.0504202	-0.137953	-0.0719784	0.873156	-0.851397	0.2	0.203766	0.0755008	-200.5	-0.415975	8.8621	8.97524	8.97524	9.63698	0.588451	0.584804	0.955793	14.7987	19.139	6.21	5.10447	-0.369432	38.4704	2.67489	23.6505	9.63698	40.2473	25.2657	27.5725	9.0856	-5.8529	22.8591	8.8621	8.90854	29.6432	13.2623	20.1903	20.9648	20.2156	13.8594
756	614	397	347	312	331	284	87	9	138	-0.183308	-0.382883	-0.261598	0.861314	-0.858306	0.330097	0.444706	0.129386	1064	-0.639555	7.02711	6.57314	6.9174	8.49942	0.763292	0.69111	0.951453	10.6253	18.8249	6.18	4.43105	-0.56806	31.616	2.66018	19.2802	8.49942	55.3793	21.4721	22.1623	7.3496	10.2089	39.4833	7.02711	6.78242	25.8182	2.16757	24.185	22.1098	25.791	10.8946
806	654	419	347	341	326	308	216	9	174	-0.197143	-0.39893	-0.281348	1	-0.669725	0.235165	0.39893	0.129351	943.25	-0.655261	7.02711	6.75331	6.88239	8.68012	0.736149	0.617245	1	27.0878	20.9541	6.18	6	-0.582005	16.136	2.75691	21.4754	8.68012	50.781	23.3776	19.0796	7.48292	9.80714	39.6547	7.02711	6.98637	20.0451	-11.7129	25.1401	23.0748	27.0399	1.80782
3526	3459	3466	3549	3868	4086	4190	2001	1015	3496	0.0811241	0.0821282	0.115839	0.984061	-0.421509	0.0768418	-0.0741435	0.04623	-12849.5	0.487474	15.2535	16.1215	15.987	15.1234	-0.420105	0.425141	0.994658	52.8423	29.0691	6.16	12.6013	0.432896	12.6447	3.07476	23.3977	15.1234	19.1231	23.0117	17.1806	15.1336	-23.4223	32.4573	15.2535	15.6974	34.2426	27.5379	23.7599	25.1661	24.2148	25.4314
1437	1163	997	928	1238	1474	1630	262	11	794	0.148954	0.0729374	0.212668	0.822437	-0.774721	0.257944	0.0246696	0.165166	-2296	0.596899	9.754	11.7687	11.3806	10.5162	0.291108	0.636564	0.936916	28.7573	21.3032	6.12	6.39883	0.530092	70.7673	2.77214	25.0963	10.5162	17.2467	25.4007	28.2221	9.98999	-13.1924	21.9573	9.754	10.7376	16.5697	12.9828	19.2627	21.2693	16.4452	10.7594
745	537	355	315	287	289	242	100	8	85	-0.167763	-0.359494	-0.239397	0.525692	-0.81378	0.497041	0.602985	0.168618	1319	-0.620926	6.80409	6.23168	6.61149	8.12814	0.844829	0.792132	0.807068	5.62055	18.6503	6.12	4.64159	-0.551525	30.3912	2.65193	18.8988	8.12814	28.9144	17.9669	18.1365	7.0807	10.9668	38.9701	6.80409	6.5962	23.0418	6.9123	24.5503	22.5641	26.3757	14.5677
1325	1133	970	1069	1545	1766	1896	318	12	933	0.251832	0.177794	0.359557	0.914356	-0.719329	0.269953	-0.134123	0.206219	-4375.5	0.711086	10.2249	12.3769	12.0873	10.425	-0.51188	0.646293	0.970596	51.3501	28.4397	6.06	6.82562	0.631495	65.8917	3.0524	24.797	10.425	32.1384	26.2478	29.499	9.89898	-16.356	20.0296	10.2249	11.5605	15.3382	55.8229	22.0166	25.6336	15.2959	32.3272
1035	917	760	735	563	571	498	119	23	249	-0.226796	-0.313754	-0.323753	0.730689	-0.870229	0.315934	0.447514	-0.00197759	1463.5	-0.686654	9.02462	7.92641	8.29619	9.71531	0.764896	0.681081	0.900694	46.0097	26.3474	6.05	4.91868	-0.609834	22.8368	2.97563	27.2744	9.71531	53.929	29.213	28.0664	9.12581	11.3535	56.6351	9.02462	8.25726	56.3678	23.7642	25.9873	25.1269	29.098	27.0935
1756	1515	1331	1314	1325	1347	1314	1082	1007	1097	-0.0195327	-0.0840787	-0.0278882	0.903125	-0.285809	0.0769878	0.134407	0.0656371	-1900.75	-0.303254	10.953	10.953	11.0439	11.4852	0.51224	0.42541	0.966606	27.2321	20.9833	5.96	10.2662	-0.269311	23.4969	2.75819	25.0121	11.4852	21.1516	25.6759	24.3312	11	-12.3873	27.5185	10.953	10.9834	39.2979	26.1379	19.0357	20.7387	16.8545	19.0117
1936	1711	1565	1522	1510	1517	1487	1108	1012	1263	-0.0336856	-0.0781348	-0.0480962	0.93985	-0.352425	0.0733676	0.108879	0.0412008	-2495	-0.363667	11.5028	11.414	11.4902	11.9605	0.477509	0.418634	0.979534	25.3405	20.615	5.95	10.3478	-0.32296	24.778	2.74196	25.2615	11.9605	21.6768	26.0971	25.1928	11.6102	-13.563	29.2311	11.5028	11.4725	42.5872	22.2794	18.8142	20.6016	16.339	16.3871
788	554	396	370	379	415	380	158	59	238	-0.0503979	-0.214912	-0.0719273	0.863128	-0.714801	0.201342	0.283893	0.182663	236	-0.415877	7.17905	7.24316	7.45904	8.21303	0.657232	0.586109	0.95212	21.1889	19.917	5.86	5.40612	-0.369378	34.7103	2.71066	21.2154	8.21303	19.4007	19.7396	21.1585	7.34342	6.17975	29.7012	7.17905	7.2368	18.5967	19.0783	23.7819	23.1739	26.1653	22.0733
1726	1520	1421	1602	2334	2774	3046	813	12	1523	0.304284	0.273423	0.434472	0.801426	-0.465132	0.27251	-0.168263	0.214049	-7314.25	0.757392	11.7009	14.4958	14.0508	11.4978	-0.552072	0.648327	0.928869	35.3153	22.912	5.81	9.33319	0.672604	21.8594	2.84024	25.3641	11.4978	25.3789	26.5582	24.7872	11.2425	-19.4114	26.0933	11.7009	13.2648	18.9071	56.4184	19.8406	21.5205	18.0618	34.6009
839	668	458	389	293	288	251	70	9	98	-0.295615	-0.456925	-0.421883	0.662651	-0.89521	0.435159	0.603842	0.0858283	1680.25	-0.750005	7.29989	6.30799	6.60385	8.74162	0.845229	0.757791	0.871823	6.16194	18.6585	5.77	4.12129	-0.666156	26.9978	2.65232	18.6503	8.74162	43.7893	19.7543	18.9814	7.70824	11.8884	47.1337	7.29989	6.64185	41.4319	-6.19427	24.4364	21.7005	25.0659	4.35757
1080	935	793	767	796	817	804	201	8	487	-0.0990991	-0.179811	-0.141472	1.02462	-0.785027	0.14336	0.16802	0.0434258	-425.75	-0.521062	9.15374	9.29862	9.34847	9.77846	0.551807	0.52337	1.00814	25.1801	20.5852	5.77	5.85777	-0.462761	24.1678	2.74064	24.1917	9.77846	46.3145	26.1096	25.0207	9.25602	-7.52289	22.108	9.15374	9.26768	29.5063	23.5609	20.3649	21.5164	19.8639	19.8355
739	550	335	319	430	457	447	106	37	130	0.0945946	-0.151832	0.135003	0.597531	-0.807273	0.514019	0.388889	0.261301	773.25	0.512997	6.83277	7.64603	7.70262	8.19321	0.72992	0.80105	0.842274	32.2589	22.1151	5.77	4.73262	0.45564	108.393	2.80692	22.7188	8.19321	36.8579	23.9101	15.1964	6.94515	9.17853	33.0704	6.83277	7.54784	2.61511	25.1942	24.5444	24.6608	26.9416	26.2282
731	564	333	326	300	345	295	68	3	87	-0.0900164	-0.339667	-0.128453	0.438849	-0.879433	0.523288	0.644315	0.204776	1459.25	-0.504563	6.88239	6.65693	7.01358	8.26215	0.863706	0.805836	0.759927	23.1619	20.2298	5.74	4.08166	-0.448168	46.9427	2.72477	20.4527	8.26215	45.9162	21.9743	25.5653	6.9313	11.3425	38.5436	6.88239	6.69433	23.0633	32.3179	25.3988	23.2867	27.3119	30.3915
1976	2070	1702	2440	3662	4164	4685	1492	1013	1437	0.414718	0.33053	0.592174	0.534273	-0.279227	0.482255	-0.0299906	0.282916	-5492.25	0.839749	13.4626	16.7328	16.0881	12.7445	-0.310691	0.784198	0.811436	83.3702	46.2483	5.72	11.4268	0.745735	0.71786	3.58948	28.3376	12.7445	45.2051	30.7358	20.9707	11.9395	-17.6434	28.8106	13.4626	15.4137	21.2846	107.056	31.2638	36.5737	21.7822	50.6042
1718	1623	1691	1763	1886	2051	2143	453	15	1723	0.0386583	0.0591304	0.0551974	1.4636	-0.720887	0.0292958	-0.244589	0.0235311	-9399	0.38075	12.0805	12.8926	12.7054	11.7518	-0.625383	0.308273	1.13538	66.913	35.9683	5.69	7.68009	0.338128	39.2568	3.30096	23.7412	11.7518	37.4581	25.2207	27.661	11.9137	-21.1038	28.5563	12.0805	12.3551	36.4284	36.6326	25.9495	29.5708	21.1725	27.9299
761	600	387	421	824	1034	1236	239	7	182	0.532891	0.358289	0.760772	0.365354	-0.601667	0.749311	0.12782	0.448128	-274	0.912889	7.49481	10.7318	10.1121	8.43433	0.503731	0.908282	0.714888	26.6482	20.8662	5.67	6.20582	0.810736	90.4275	2.75305	24.059	8.43433	48.1242	26.0011	23.9654	7.28736	-6.49507	7.66981	7.49481	9.3751	-0.576649	59.1491	20.3574	23.4054	14.9162	33.3771
741	655	412	765	2146	2855	3369	568	10	431	0.748627	0.627947	1.0689	0.350314	-0.132824	0.73855	-0.210368	0.628075	-3297.75	1.02246	9.14577	14.9911	14.1863	8.68455	-0.594739	0.903913	0.704941	44.3507	25.7485	5.61	8.28164	0.908006	42.658	2.95291	24.9113	8.68455	76.1332	25.6658	28.6087	7.44102	-14.8847	2.40105	9.14577	12.8986	38.5193	216.81	20.4253	26.4264	0.903385	19.382
2275	2181	2119	1993	2040	2066	2016	1184	1007	1703	-0.0339107	-0.0483057	-0.0484194	0.951515	-0.45713	0.0752104	0.0730627	0.00200165	-3990.25	-0.36448	12.5845	12.6327	12.7363	12.9684	0.418054	0.42211	0.98357	25.2462	20.5974	5.61	10.5791	-0.323677	26.5998	2.74118	25.6725	12.9684	27.4425	27.1403	26.8632	12.8443	-15.8611	31.6023	12.5845	12.6827	41.591	16.2861	19.1227	20.944	16.702	13.0393
819	577	438	383	327	351	286	57	6	56	-0.225175	-0.351288	-0.321357	0.382671	-0.901213	0.663664	0.689605	0.111562	1660.75	-0.684956	7.26217	6.58853	7.054	8.32515	0.883487	0.872267	0.726009	11.3115	18.866	5.57	3.8485	-0.608378	35.8455	2.66211	18.8834	8.32515	17.3713	15.8049	17.4399	7.59436	11.8423	46.0145	7.26217	6.88942	31.4886	1.4602	23.9427	22.3839	26.0163	10.5845
1849	1630	1564	1640	1838	2113	2274	1401	1013	1900	-0.0585448	-0.0791129	-0.0835899	1.46873	-0.140491	-0.154664	-0.112442	0.0175879	-7224.75	-0.437238	11.7927	13.1501	12.8322	11.7687	-0.482662	-0.53678	1.1367	5.50077	18.6488	5.48	11.1896	-0.388296	34.2412	2.65186	27.3559	11.7687	22.8907	29.2826	30.9301	11.6077	-19.3319	27.4863	11.7927	12.2494	31.9181	38.6384	18.7285	20.0727	17.1826	25.9295
842	784	488	422	308	328	290	223	13	177	-0.303071	-0.500478	-0.432538	0.980843	-0.715561	0.191781	0.507692	0.0610871	1560	-0.756266	7.50074	6.61911	6.89643	9.22087	0.79775	0.57668	0.993573	4.5045	18.6414	5.32	6.06413	-0.671709	10.6942	2.65151	18.7134	9.22087	78.7449	21.7387	14.7924	7.87299	11.5978	47.7508	7.50074	6.75331	46.142	-2.17171	24.1384	21.1408	24.1654	6.55559
1135	998	819	769	709	767	758	253	93	547	-0.0712884	-0.168618	-0.101771	1.02113	-0.746493	0.129674	0.158445	0.0594315	-589.75	-0.466884	9.16169	9.11779	9.15374	9.99333	0.541119	0.506156	1.00699	17.0709	19.3744	5.29	6.3247	-0.414642	23.1522	2.68582	24.292	9.99333	46.5952	26.2256	24.8322	9.3561	-8.38602	21.8768	9.16169	8.91693	39.3624	15.844	20.2832	20.7784	20.706	15.8594
1065	870	769	705	700	759	724	121	15	454	-0.12674	-0.186903	-0.180928	1.01174	-0.86092	0.135238	0.181263	0.0384495	-329.5	-0.56559	8.90013	8.97938	9.1218	9.5464	0.565939	0.513294	1.0039	26.4612	20.8294	5.28	4.94609	-0.502309	30.6305	2.75143	24.1204	9.5464	34.6197	25.5229	26.1825	9.16169	-6.90693	22.1497	8.90013	8.87904	31.6195	10.0646	21.0521	21.8783	21.3497	12.6885
1492	1357	1300	1209	1210	1287	1290	256	7	860	-0.0556232	-0.0769841	-0.0794162	0.99742	-0.811349	0.149778	0.0782678	0.0104662	-1867.75	-0.429836	10.6531	10.8859	10.8774	11.0712	0.427754	0.531067	0.999139	19.8864	19.7292	5.11	6.3496	-0.381726	24.6736	2.70211	25.1713	11.0712	37.9408	27.0106	26.1681	10.9139	-12.3151	27.1856	10.6531	10.656	38.977	12.4779	18.8038	20.3847	16.796	10.7074
1051	842	733	681	663	725	716	224	12	447	-0.0747801	-0.143245	-0.106752	1.0206	-0.733967	0.170686	0.133244	0.068615	-595	-0.47438	8.79797	8.94618	8.98351	9.44287	0.510758	0.55471	1.00682	12.9058	18.9775	5.11	6.07318	-0.421304	24.7673	2.66735	24.299	9.44287	31.1383	25.5179	24.5522	9.01643	-8.41083	19.569	8.79797	8.71976	32.6016	13.6616	20.3868	21.0716	20.6138	14.4218
779	559	391	357	371	382	357	79	7	154	-0.123563	-0.293981	-0.17634	0.740984	-0.858676	0.328976	0.424204	0.161844	832.25	-0.560768	7.09397	7.09397	7.25584	8.23766	0.751378	0.690327	0.904905	3.94359	18.6411	5.08	4.29084	-0.498077	39.4177	2.65149	19.3258	8.23766	24.882	17.8811	20.367	7.31238	9.40628	37.0947	7.09397	7.18552	17.1269	13.2977	23.0935	22.3908	25.2403	17.8028
3581	3622	3771	4242	5330	6024	6459	1024	15	4414	0.147218	0.166878	0.210218	1.05105	-0.717283	0.0694635	-0.190976	0.0686589	-20246.8	0.594598	16.1879	18.6232	18.1954	15.3573	-0.575873	0.411073	1.01674	80.2504	44.1164	5.02	10.0794	0.528025	14.5553	3.53346	20.6059	15.3573	19.0366	18.7546	13.0681	15.5651	-27.2554	33.6608	16.1879	17.468	20.7799	31.2253	31.6798	33.4517	34.786	35.6064
1065	802	720	691	709	723	781	379	90	515	0.0136986	-0.0402075	0.0195559	1.05405	-0.527431	0.179283	0.0139064	0.112481	-1513.25	0.269418	8.84082	9.2091	8.97524	9.29091	0.240476	0.563871	1.0177	4.44732	18.6413	5.01	7.2368	0.239272	42.353	2.6515	25.1656	9.29091	16.7578	25.4549	28.3607	8.96281	-11.4807	16.5596	8.84082	8.91693	28.771	22.0876	19.9684	21.0695	19.3909	18.6132
780	560	348	292	236	238	206	66	9	90	-0.242857	-0.450777	-0.346535	0.617925	-0.882143	0.403974	0.620839	0.175355	1415.5	-0.702397	6.63429	5.90594	6.19715	8.24257	0.853087	0.739238	0.851749	12.3695	18.9375	4.94	4.04124	-0.623903	31.7841	2.66547	19.1216	8.24257	24.9131	17.5956	18.159	7.03385	11.228	39.2207	6.63429	6.17975	29.3878	-6.72424	25.9032	22.5488	25.5571	4.36056
917	748	542	488	504	535	513	146	51	268	-0.0796813	-0.236364	-0.113736	0.813853	-0.804813	0.265753	0.330961	0.119773	635.5	-0.484507	7.87299	8.0052	8.11804	9.07752	0.691712	0.642924	0.933645	1.86106	18.6641	4.94	5.26564	-0.430314	32.1702	2.65258	19.5723	9.07752	43.477	20.7643	21.5688	8.15329	8.59749	42.3316	7.87299	7.95811	22.7014	7.33804	21.5013	21.3047	22.9599	12.1578
1087	925	845	758	741	779	795	186	9	521	-0.116986	-0.161331	-0.167009	0.95509	-0.798919	0.123633	0.183621	0.0188679	-451.75	-0.550698	9.11779	9.2638	9.20123	9.74348	0.568383	0.498171	0.9848	0.704063	18.6934	4.92	5.70827	-0.489078	23.8416	2.65397	24.1013	9.74348	42.2366	25.886	24.6724	9.45407	-7.67302	23.2366	9.11779	9.04911	34.0747	4.28215	19.8201	20.6872	19.5605	7.42953
2146	1944	1763	1712	1879	1915	1825	1110	1009	1366	0.0516407	0.00282124	0.0737344	0.8711	-0.429012	0.177356	0.0660817	0.0753901	-3281.25	0.419331	11.9628	12.2205	12.4181	12.4805	0.404291	0.561844	0.955042	79.6637	43.7251	4.89	10.354	0.372389	14.8073	3.52298	29.4293	12.4805	22.0415	32.3169	28.9853	12.0805	-14.8598	30.1238	11.9628	12.3398	33.9412	21.8089	31.5942	34.833	30.9003	27.3786
1881	1738	1496	1464	1575	1626	1631	1118	1010	1188	0.0144928	-0.0604027	0.0206927	0.861039	-0.356732	0.129032	0.134465	0.0668954	-2004	0.27454	11.3548	11.7711	11.7591	12.0231	0.512314	0.50532	0.951351	28.1979	21.1835	4.89	10.3788	0.243809	16.6112	2.76694	25.0252	12.0231	29.7476	26.3998	22.7532	11.437	-12.6076	29.1574	11.3548	11.6348	34.4913	23.7409	18.9443	20.7849	16.3988	17.2877
1179	1035	790	672	580	601	565	116	15	326	-0.21632	-0.340674	-0.308804	0.823183	-0.887923	0.219162	0.423659	0.0330477	1440.25	-0.675918	8.75904	8.26703	8.43901	10.1153	0.751056	0.602913	0.9372	3.10591	18.6458	4.84	4.877	-0.600296	23.9776	2.65171	18.8031	10.1153	43.991	19.9499	18.1796	9.24434	11.2931	57.2699	8.75904	8.33955	42.6428	-8.6944	20.8242	20.4102	22.1281	0.148562
825	580	377	331	387	442	364	73	6	110	-0.0428769	-0.2527	-0.061192	0.456647	-0.874138	0.517544	0.571816	0.216623	1299	-0.394062	6.9174	7.14004	7.61741	8.33955	0.830014	0.802877	0.770064	24.5815	20.476	4.79	4.17934	-0.350005	54.0111	2.73578	20.7952	8.33955	16.4162	18.5842	23.0715	7.22405	10.9111	40.166	6.9174	7.28736	9.48586	3.73803	24.0346	23.3136	26.5046	12.5369
939	830	586	512	479	497	503	218	32	276	-0.0902326	-0.258529	-0.128801	0.885481	-0.737349	0.278431	0.314331	0.0984615	706.75	-0.505017	8	7.95285	7.9211	9.3978	0.679927	0.652989	0.960269	23.64	20.3107	4.57	6.01846	-0.448526	23.6695	2.7284	21.0065	9.3978	59.7549	23.2562	21.7109	8.36821	8.90749	44.7986	8	7.82429	30.5528	-0.77686	22.7039	21.7679	24.6922	7.96592
1153	1014	830	787	754	789	752	198	11	488	-0.0709677	-0.16955	-0.101314	0.95	-0.804734	0.192053	0.194346	0.0602887	-202	-0.466183	9.23262	9.09367	9.24043	10.0465	0.57924	0.576953	0.983048	30.6589	21.7307	4.52	5.82848	-0.414019	27.3623	2.79056	24.1602	10.0465	45.6872	26.0602	25.9002	9.3978	-5.86746	24.9174	9.23262	9.10173	36.4061	18.2664	21.1882	21.8529	21.7596	18.1609
739	498	333	289	273	278	232	49	5	82	-0.170475	-0.356948	-0.243255	0.466102	-0.901606	0.484277	0.638158	0.1883	1267.5	-0.624243	6.61149	6.14463	6.52652	7.92641	0.860946	0.785292	0.775342	4.96278	18.6437	4.52	3.65931	-0.554481	43.7953	2.65162	18.9326	7.92641	13.8865	15.1453	18.5791	6.9313	10.8222	37.1588	6.61149	6.48715	19.1503	1.99735	24.8359	22.8853	26.7893	11.5706
6647	6386	6664	6425	6826	7334	7623	1616	23	3025	-0.0121507	0.00915438	-0.0173506	0.679428	-0.746946	0.365096	0.182045	-0.00668454	-2076.75	-0.258884	18.5905	19.6808	19.4288	18.5528	0.566752	0.71472	0.879119	36.8735	23.3499	4.49	11.7349	-0.229897	35.3993	2.85822	24.9292	18.5528	43.3151	26.8751	28.6518	18.8182	-12.7584	21.5266	18.5905	18.9695	25.7526	34.6863	32.838	31.163	37.5167	39.513
1101	1051	858	997	1259	1698	1576	236	17	684	0.421248	0.334389	0.601455	0.529663	-0.775452	0.509853	-0.0299954	0.303006	-2667.75	0.844114	9.98999	11.6373	11.9301	10.1672	-0.310707	0.79888	0.809096	127.853	85.9613	4.48	6.17975	0.749628	87.8267	4.41334	55.9442	10.1672	65.6458	52.2668	43.4209	9.50231	-13.8691	18.6621	9.98999	10.798	19.8985	71.2477	76.6593	82.9508	87.1735	92.9436
752	567	349	339	501	549	534	132	42	169	0.150852	-0.0903846	0.215304	0.56871	-0.767196	0.47352	0.356459	0.274051	609	0.599355	6.97268	8.11298	8.18824	8.27677	0.709039	0.779434	0.828509	40.7688	24.5381	4.43	5.09164	0.532333	104.085	2.9059	25.1755	8.27677	38.6638	27.0409	19.0653	7.04058	8.47629	32.2514	6.97268	7.94229	0.204278	29.9771	25.3665	26.2918	27.256	29.105
1076	895	755	721	855	945	932	168	30	446	0.0376036	-0.0473961	0.0536833	0.77027	-0.812291	0.292063	0.176084	0.111765	-358	0.377236	8.96696	9.76799	9.8132	9.63698	0.560497	0.663477	0.916673	46.7525	26.6234	4.37	5.51785	0.335024	79.5701	2.98598	25.72	9.63698	37.9316	27.6872	28.2984	9.10575	-7.10059	21.5547	8.96696	9.49122	19.6532	20.551	23.562	25.4414	22.9503	20.452
791	584	369	378	491	542	538	89	9	129	0.112981	-0.115568	0.161254	0.537797	-0.847603	0.564189	0.402161	0.259036	869.5	0.544298	7.23043	8.13319	8.15329	8.35868	0.738131	0.826307	0.813216	44.603	25.838	4.34	4.46475	0.483431	118.405	2.95633	26.5659	8.35868	30.4225	28.5258	11.9735	7.17258	9.54457	36.1499	7.23043	7.88909	6.44148	43.4324	26.5206	27.1481	29.2272	37.3464
1985	1736	1440	1381	1430	1468	1414	1073	1008	1114	-0.0271041	-0.12	-0.0386988	0.872434	-0.381912	0.100888	0.186603	0.075293	-1220.5	-0.338246	11.1361	11.2241	11.3652	12.0185	0.571443	0.465528	0.95553	21.7211	19.9979	4.33	10.2376	-0.300385	23.7114	2.71432	24.7881	12.0185	19.2226	25.1407	23.8066	11.2924	-10.6868	29.9649	11.1361	11.2662	37.3592	19.3583	18.6922	20.4361	16.2663	14.5878
2746	2601	2426	2826	3255	3676	3845	609	11	2436	0.130777	0.0964044	0.186736	1.02757	-0.765859	0.128755	-0.109856	0.0976381	-10056	0.571579	14.1381	15.6663	15.4333	13.7525	-0.478933	0.504958	1.00911	99.1147	58.3138	4.31	8.47629	0.507588	31.9187	3.87785	29.2058	13.7525	20.8535	31.9474	33.2937	13.4368	-21.5845	31.9259	14.1381	14.8201	30.5477	50.4136	39.9394	45.4753	34.0883	44.1334
779	533	363	351	416	413	420	138	46	170	0.0307076	-0.159956	0.0438254	0.702073	-0.741088	0.388489	0.325871	0.232152	484	0.352567	7.054	7.48887	7.44703	8.10791	0.688148	0.72967	0.888779	24.0381	20.3797	4.3	5.16765	0.313147	86.3331	2.73149	21.2707	8.10791	13.8855	18.8797	20.3394	7.13349	7.85142	31.6234	7.054	7.46502	9.66736	28.5275	23.5466	23.6428	25.5857	27.0314
940	788	593	518	496	536	506	120	10	295	-0.117813	-0.254777	-0.16817	0.873932	-0.847716	0.226737	0.316625	0.0855821	587.75	-0.551971	8.03113	7.96863	8.1231	9.23653	0.681577	0.609781	0.956076	3.21154	18.6448	4.3	4.93242	-0.490228	31.697	2.65167	19.617	9.23653	47.9809	21.2432	21.9439	8.4014	8.37653	43.7543	8.03113	7.91578	29.0355	-0.902083	21.5705	21.1262	23.1498	6.65203
910	714	535	474	390	404	347	68	1	148	-0.232719	-0.363897	-0.332159	0.552553	-0.904762	0.384615	0.5902	0.0747946	1629.75	-0.692546	7.79697	7.02711	7.39254	8.93784	0.838816	0.727236	0.820587	15.4942	19.2062	4.28	4.08166	-0.615097	32.0408	2.67802	19.2653	8.93784	35.2354	19.4034	20.1144	8.11804	11.7681	50.2404	7.79697	7.30614	39.0655	3.32083	23.1633	21.7337	25.086	11.1276
1021	705	475	415	406	433	383	101	10	141	-0.1323	-0.31899	-0.188829	0.612637	-0.856738	0.441584	0.519397	0.186296	1449.25	-0.573706	7.45904	7.26217	7.56535	8.90013	0.803834	0.761502	0.849313	3.53749	18.6426	4.27	4.65701	-0.50955	33.5553	2.65156	18.7932	8.90013	-0.334911	11.4508	12.3613	7.80245	11.3166	46.3952	7.45904	7.40472	23.5269	0.617552	22.6049	21.4979	24.5117	8.80261
1925	1786	1867	1806	1762	1840	1886	300	10	1319	-0.0415621	-0.0194064	-0.0593435	1.02328	-0.832027	0.13138	0.00790068	-0.0123356	-3944.75	-0.390054	12.1779	12.3551	12.2539	12.1328	0.199169	0.508365	1.0077	28.5743	21.2637	4.27	6.69433	-0.34639	23.8368	2.77043	25.4772	12.1328	29.4237	26.9952	25.8993	12.3135	-15.8006	30.4026	12.1779	12.0782	46.13	21.0352	18.993	20.8218	16.4974	15.7713
791	649	355	294	307	340	304	99	12	79	-0.0757576	-0.360587	-0.108112	0.478689	-0.847458	0.588542	0.632704	0.213732	1718.5	-0.476384	6.6494	6.72395	6.97953	8.65795	0.858487	0.838029	0.78226	21.4741	19.96	4.26	4.62607	-0.423131	40.8835	2.71261	20.0322	8.65795	54.5901	22.1431	24.8684	7.0807	11.978	41.695	6.6494	6.746	13.6276	-10.1251	25.0626	22.5154	26.2056	2.34134
866	708	639	560	402	409	314	54	5	62	-0.320248	-0.365477	-0.457112	0.328267	-0.923729	0.682864	0.735294	-0.0335625	2147.25	-0.770325	8.24257	6.79688	7.42291	8.91274	0.902583	0.880599	0.689831	32.906	22.277	4.22	3.77976	-0.684167	29.6884	2.81375	22.5276	8.91274	47.6985	24.3429	24.6852	8.61325	12.9011	57.2357	8.24257	7.38032	55.457	-0.484699	25.0845	23.5577	27.5419	10.4427
955	945	784	719	456	488	365	77	8	61	-0.333333	-0.413613	-0.475827	0.32398	-0.918519	0.730684	0.76306	-0.0758148	3006.25	-0.780698	8.95866	7.14657	7.87299	9.8132	0.913804	0.900693	0.686814	50.2148	27.9739	4.22	4.25432	-0.693361	23.065	3.03564	29.6482	9.8132	83.0467	27.4733	26.1936	9.22087	14.4325	65.9483	8.95866	7.697	76.5289	10.0724	28.8478	26.1602	30.7581	20.1014
678	463	277	234	267	290	234	62	6	75	-0.101392	-0.343977	-0.144664	0.49115	-0.866091	0.501661	0.61324	0.240055	1145.25	-0.524953	6.16224	6.16224	6.61911	7.73619	0.849592	0.794579	0.78899	6.21387	18.6595	4.16	3.95789	-0.466302	47.2883	2.65236	19.0486	7.73619	22.9232	17.1332	21.0407	6.51868	10.4625	32.1179	6.16224	6.43928	5.48844	-2.67746	24.9763	23.219	27.187	8.60531
856	611	400	359	390	440	392	130	51	146	-0.029601	-0.236842	-0.042247	0.564987	-0.787234	0.441683	0.48301	0.212986	1096.25	-0.348283	7.10719	7.31861	7.6059	8.48556	0.784607	0.761559	0.826696	11.4248	18.8732	4.11	5.0658	-0.30934	43.3665	2.66245	19.3001	8.48556	17.561	16.4848	19.7862	7.36806	10.3111	39.916	7.10719	7.30614	14.6447	8.7645	22.9594	22.1552	25.0546	14.746
897	778	538	461	313	325	261	57	9	111	-0.331683	-0.484733	-0.473393	0.603704	-0.926735	0.417323	0.65356	0.0405707	2087.25	-0.779364	7.72503	6.39068	6.87534	9.19729	0.867818	0.747293	0.845165	16.5354	19.3148	4.07	3.8485	-0.692215	28.0382	2.68306	19.1349	9.19729	58.6135	21.5382	21.2207	8.13319	12.7798	53.1591	7.72503	6.78966	54.983	-5.15198	24.4955	21.4851	24.5885	4.73977
888	666	660	693	767	872	908	192	7	596	-0.214351	-0.218664	-0.305973	2.01874	-0.711712	-0.1652	-0.128272	-0.00189753	-2529.75	-0.673847	8.84934	9.68342	9.55371	8.73289	-0.504325	-0.548703	1.26384	26.6985	20.8762	4.04	5.769	-0.59847	16.6082	2.75349	25.2259	8.73289	26.5576	26.4515	22.8118	8.70659	-13.6257	13.3582	8.84934	9.15374	23.4502	46.2771	20.6639	22.9481	17.7388	30.0012
1213	1069	962	886	902	969	965	203	13	611	-0.0618102	-0.114122	-0.0882441	0.94	-0.810103	0.163587	0.14454	0.0348633	-812.75	-0.445207	9.60457	9.88195	9.89558	10.2249	0.524802	0.54691	0.979586	15.4305	19.1999	3.96	5.87713	-0.395385	28.0191	2.67773	24.5274	10.2249	43.1364	26.4086	26.4562	9.87169	-9.33223	24.1548	9.60457	9.66204	33.165	10.4745	19.3358	20.5532	18.2883	10.5693
994	842	606	589	703	749	772	154	48	300	0.0411392	-0.122667	0.058727	0.673252	-0.817102	0.373695	0.310506	0.153631	606.5	0.388698	8.38247	9.17359	9.08156	9.44287	0.677158	0.720287	0.876448	22.8934	20.1852	3.94	5.36011	0.345212	83.9519	2.72277	20.976	9.44287	46.7344	22.609	23.5329	8.46235	8.46467	44.4384	8.38247	8.89171	16.6232	26.4074	20.7031	21.6538	20.6732	22.081
1565	1238	1062	1170	1404	1594	1717	366	14	908	0.19024	0.115398	0.271619	0.963485	-0.704362	0.26448	-0.0970095	0.190857	-3951.25	0.647619	10.5373	11.9745	11.6814	10.7376	-0.459485	0.641895	0.987677	52.1507	28.775	3.92	7.15309	0.575132	56.5145	3.06435	24.917	10.7376	9.36236	24.1276	28.1133	10.2025	-15.8093	21.9096	10.5373	11.1975	24.3706	54.742	22.5343	25.4873	18.457	34.2104
840	611	441	398	401	432	414	85	11	190	-0.15748	-0.311159	-0.224756	0.853583	-0.860884	0.25636	0.380791	0.136564	745.25	-0.608	7.35576	7.45304	7.55953	8.48556	0.724818	0.635258	0.948597	1.15581	18.6806	3.89	4.39683	-0.540019	34.4042	2.65336	19.4567	8.48556	23.0824	17.7552	19.0471	7.61166	9.06638	38.9281	7.35576	7.3742	20.8732	9.40239	22.6936	22.0525	24.7006	14.884
922	692	534	526	523	565	555	179	62	308	-0.00187617	-0.130719	-0.0026781	0.851504	-0.741329	0.266667	0.208734	0.153053	-24	-0.13887	8.07226	8.21797	8.26703	8.84509	0.593195	0.64366	0.947827	30.1281	21.6082	3.89	5.63574	-0.123336	47.7358	2.78531	23.7501	8.84509	24.3971	24.1529	27.7115	8.11298	-2.8845	19.545	8.07226	8.05689	26.5731	30.7264	23.0308	23.2335	24.7969	27.6152
1853	1645	1486	1453	1447	1470	1441	1140	1010	1227	-0.0315863	-0.0822368	-0.0450985	0.969892	-0.306991	0.0640732	0.0973983	0.044373	-2555	-0.355949	11.3263	11.295	11.3703	11.8047	0.460098	0.400152	0.989862	24.3242	20.4301	3.86	10.4464	-0.316106	25.4137	2.73374	25.3166	11.8047	23.9577	26.3764	25.6891	11.4114	-13.6709	28.4387	11.3263	11.3107	41.6881	23.5764	18.7886	20.5345	16.4003	17.1932
3478	3689	3933	4229	4611	4991	5296	2233	1017	4257	0.0232212	0.0551927	0.0331581	1.23519	-0.394687	-0.0163543	-0.15949	-0.0173306	-18336.8	0.321265	16.1713	17.4307	17.0895	15.4515	-0.542306	-0.253831	1.07295	76.0058	41.3535	3.86	13.0706	0.285295	23.7071	3.4581	21.1088	15.4515	19.3936	19.5771	17.6754	15.7849	-26.3698	32.7591	16.1713	16.6443	32.1042	28.198	29.3717	31.6978	30.2581	30.4658
1068	936	709	655	608	642	618	135	12	358	-0.125397	-0.258911	-0.179006	0.965517	-0.855769	0.212321	0.275204	0.0661837	493.75	-0.56358	8.68455	8.51784	8.62671	9.78195	0.650457	0.596574	0.988371	13.0499	18.9887	3.85	5.12993	-0.500529	28.707	2.66787	20.0419	9.78195	49.6212	21.8239	21.7242	8.91693	7.9038	46.4348	8.68455	8.47165	35.801	12.3863	20.7729	20.7785	21.841	14.5677
1829	1691	1465	1406	1410	1422	1394	1089	1010	1167	-0.0390071	-0.110309	-0.0556937	0.921033	-0.356002	0.074544	0.150732	0.041544	-1776	-0.381887	11.2028	11.1709	11.2452	11.9137	0.532192	0.42086	0.972953	17.3559	19.4072	3.81	10.2883	-0.339142	24.5635	2.68733	25.1816	11.9137	31.0412	26.693	25.7849	11.3574	-12.1101	29.1761	11.2028	11.2135	40.6187	19.4993	18.5728	20.2687	16.2061	14.6268
1812	1561	1374	1384	1490	1514	1573	1091	1007	1284	-0.00807043	-0.0717473	-0.0115228	1.00074	-0.301089	0.0257967	0.0713795	0.0703654	-3037	-0.225867	11.1441	11.6299	11.4826	11.6003	0.414818	0.295475	1.00025	14.7303	19.1326	3.77	10.2946	-0.200585	22.7501	2.67459	25.835	11.6003	19.7627	26.7852	25.3279	11.1172	-14.4815	26.849	11.1441	11.4216	33.9162	30.6059	18.5185	20.1614	16.2492	21.0352
1729	1519	1316	1283	1306	1305	1268	1072	1014	1076	-0.0197598	-0.0912356	-0.0282123	0.87668	-0.294273	0.0807347	0.156012	0.0643441	-1635.25	-0.304424	10.8661	10.8236	10.9279	11.4953	0.538335	0.432202	0.957077	24.4874	20.4592	3.75	10.2345	-0.270351	23.3173	2.73503	24.9623	11.4953	24.8941	25.9436	24.5712	10.9585	-11.7813	27.7456	10.8661	10.9307	38.1247	23.2862	18.8978	20.5543	16.7627	17.3009
735	517	319	495	805	841	1094	260	14	228	0.0434783	-0.195376	0.0620471	1.20115	-0.497099	0.208333	0.105882	0.258571	-318	0.395889	7.91046	10.304	9.43913	8.02596	0.473087	0.592816	1.063	23.6372	20.3102	3.7	6.3825	0.351634	61.9946	2.72838	24.0267	8.02596	24.182	24.5298	28.3424	6.83277	-6.82562	2.97766	7.91046	9.30248	3.0372	159.962	20.1913	23.7416	12.8186	43.8336
680	448	267	293	341	366	323	67	4	110	-0.063745	-0.311859	-0.0909503	0.655319	-0.850446	0.362319	0.488372	0.26294	814.75	-0.449712	6.64185	6.86121	7.15309	7.65172	0.787499	0.712903	0.868596	43.4394	25.4298	3.68	4.06155	-0.399468	51.6273	2.94068	26.1202	7.65172	14.392	26.7119	30.3558	6.43928	9.33988	28.43	6.64185	6.98637	7.90491	63.0789	28.7638	28.3916	32.8701	48.1135
2095	1916	1814	1728	1748	1858	1835	295	10	1080	-0.0300965	-0.0573951	-0.0429726	0.872365	-0.846033	0.225251	0.125073	0.02355	-1693	-0.350265	12	12.2427	12.2937	12.4203	0.500098	0.608446	0.955505	36.7377	23.3109	3.62	6.65693	-0.311056	25.7531	2.85662	24.8908	12.4203	24.1501	25.7761	25.1312	12.1959	-11.9184	32.112	12	12.0461	41.8003	18.0197	19.5408	21.5757	16.7747	14.1638
6971	6954	7367	7208	7855	8406	8795	1759	17	2522	0.0203457	0.0491557	0.0290529	0.56966	-0.747052	0.505248	0.228079	-0.00306352	1478.25	0.307418	19.3169	20.6417	20.3328	19.0873	0.610982	0.796468	0.828969	49.8754	27.8368	3.58	12.0713	0.272997	17.9509	3.03068	29.0074	19.0873	37.2335	31.7707	29.4317	19.4579	11.3915	57.4402	19.3169	19.8784	18.35	33.9181	35.2045	32.5909	38.9545	40.2487
1546	1442	1478	1410	1469	1548	1633	282	21	1121	-0.0415786	-0.0292648	-0.0593653	1.06618	-0.804438	0.0963321	-0.00276625	-0.00852951	-3454.75	-0.390101	11.2135	11.7759	11.568	11.2977	-0.140377	0.458413	1.02159	8.58223	18.727	3.56	6.55767	-0.346436	24.8342	2.65556	26.1485	11.2977	40.6703	28.2601	27.5939	11.3909	-15.1172	27.6701	11.2135	11.3677	37.0087	18.1768	18.4563	20.0547	16.2599	13.8644
1244	1074	990	1014	936	1016	1015	194	8	659	-0.0772579	-0.117586	-0.110299	0.958726	-0.819367	0.125415	0.138315	0.0275049	-980.25	-0.479575	10.0465	10.0498	10.0531	10.2408	0.517158	0.500552	0.986048	45.441	26.1393	3.48	5.78896	-0.425907	27.012	2.96778	25.3157	10.2408	37.4807	27.1729	27.0121	9.96655	-9.93373	24.1693	10.0465	9.78195	44.1763	36.8384	22.7514	24.2847	22.5342	29.0668
1479	1380	1235	1291	1926	2258	2390	552	44	1093	0.291045	0.23946	0.415561	0.750111	-0.6	0.345901	-0.100098	0.202969	-4796	0.746239	10.8887	13.37	13.1192	11.1334	-0.46431	0.701968	0.908605	35.7719	23.0381	3.39	8.20313	0.662705	39.1595	2.84544	25.1728	11.1334	43.1235	27.1517	29.5887	10.7289	-16.864	24.2427	10.8887	12.4419	16.6521	40.1402	19.4958	21.7322	16.172	25.9167
1449	1325	1284	1227	1214	1256	1277	287	53	896	-0.0338164	-0.049505	-0.0482815	0.998333	-0.783396	0.145038	0.0503369	0.0155262	-2256	-0.364133	10.7057	10.8492	10.7894	10.9834	0.369229	0.525405	0.999444	23.944	20.3632	3.37	6.5962	-0.323377	25.6448	2.73075	25.2249	10.9834	40.4888	27.1549	26.6101	10.869	-13.1153	26.4864	10.7057	10.6678	40.2628	18.7268	18.9859	20.6372	16.9005	14.6917
853	645	478	437	406	422	376	106	11	223	-0.118129	-0.262231	-0.168603	0.862069	-0.835659	0.256667	0.329897	0.125343	572.5	-0.552445	7.58858	7.21765	7.50074	8.64012	0.69097	0.635511	0.951731	24.086	20.388	3.33	4.73262	-0.490665	34.0983	2.73186	21.1932	8.64012	30.9684	21.3537	22.6693	7.81885	8.30345	38.8442	7.58858	7.40472	28.0521	12.1062	23.6936	22.7918	26.0227	17.6628
982	779	588	560	579	644	608	144	36	306	-0.0700637	-0.207752	-0.100012	0.829746	-0.815148	0.250918	0.295096	0.118771	450.75	-0.464177	8.24257	8.47165	8.63566	9.20123	0.665765	0.630731	0.939684	22.6092	20.1387	3.31	5.24148	-0.412253	33.7135	2.72068	21.0934	9.20123	32.9931	21.464	22.6895	8.37772	7.66735	41.8692	8.24257	8.33476	24.8718	21.2934	21.6007	21.9028	22.7366	20.7251
1152	1113	887	786	556	586	505	72	8	216	-0.294891	-0.394737	-0.420972	0.674948	-0.93531	0.381974	0.546908	-0.0407744	2433.25	-0.749465	9.22871	7.96337	8.36821	10.3633	0.817783	0.725568	0.877183	27.1465	20.9659	3.29	4.16017	-0.665611	26.576	2.75743	20.9085	10.3633	65.1045	23.2578	22.6341	9.60818	13.4502	65.5813	9.22871	8.2229	66.9028	1.15171	22.2901	21.2167	24.1038	8.8518
2750	2915	3147	3349	4262	4782	5135	1053	22	3241	0.113771	0.151383	0.162455	1.02503	-0.638765	0.0992218	-0.163438	0.0316178	-14457.5	0.545646	14.9614	17.2523	16.8475	14.285	-0.546744	0.462952	1.00828	50.1652	27.9538	3.24	10.1736	0.484556	14.3344	3.03492	23.5222	14.285	28.7501	24.266	19.372	14.6543	-24.3611	33.1176	14.9614	16.2133	23.0048	31.958	24.4393	24.0758	27.0181	29.9761
1118	1048	879	843	813	835	809	245	54	559	-0.112658	-0.198399	-0.160832	1.00428	-0.766221	0.112698	0.196347	0.0170534	-336.5	-0.543823	9.44661	9.31786	9.41663	10.1575	0.581221	0.483028	1.00142	28.9794	21.3515	3.2	6.25732	-0.482971	20.0178	2.77423	24.2187	10.1575	60.8791	26.0809	23.6277	9.57921	-6.9555	24.8017	9.44661	9.33319	36.9891	20.883	20.6515	21.5607	20.6646	18.8828
1991	1949	2088	1970	2104	2298	2492	491	13	1603	-0.029332	0.00510465	-0.0418817	1.10615	-0.748076	0.102464	-0.0554882	-0.0265487	-5816.5	-0.347276	12.5359	13.5576	13.1962	12.4912	-0.381417	0.46794	1.0342	13.4004	19.0167	3.2	7.88909	-0.3084	19.3148	2.66918	26.7821	12.4912	35.7362	28.9668	26.6675	12.7814	-17.984	30.9243	12.5359	12.8139	37.2112	16.7459	19.1327	20.3927	17.9204	14.2631
753	534	364	299	302	303	269	65	16	157	-0.157393	-0.336671	-0.224604	0.728302	-0.878277	0.255924	0.469051	0.166094	866	-0.607863	6.68688	6.45531	6.71657	8.11298	0.776974	0.634898	0.899713	4.92641	18.6435	3.17	4.02073	-0.539918	39.6373	2.65161	19.2929	8.11298	24.4283	17.7555	20.2892	7.14004	9.53175	35.8126	6.68688	6.70917	15.7967	-12.3732	24.2524	22.584	26.3274	0.726528
803	591	441	416	445	423	380	91	9	193	-0.0742996	-0.217302	-0.106045	0.686842	-0.846024	0.326353	0.387324	0.145763	694.25	-0.473329	7.46502	7.24316	7.50666	8.39194	0.728939	0.688487	0.882305	27.9382	21.1289	3.17	4.49794	-0.4204	42.9528	2.76456	21.7948	8.39194	28.7057	21.8922	24.9566	7.61166	8.85466	38.4031	7.46502	7.63461	17.8909	20.7416	23.6511	23.6437	25.7953	22.772
1695	1665	1598	1442	1258	1296	1275	264	19	842	-0.141836	-0.161898	-0.202511	0.904246	-0.841441	0.175722	0.210469	-0.0492449	-299.75	-0.587241	11.2977	10.8435	10.9027	11.8524	0.594834	0.560113	0.967005	15.2453	19.1817	3.12	6.41507	-0.52151	17.0812	2.67688	23.8666	11.8524	44.5387	25.6984	22.1229	11.6912	-6.69247	35.3062	11.2977	10.7951	56.4376	6.55418	18.6113	20.2045	16.4934	6.57526
770	539	357	339	328	347	306	132	57	148	-0.0785498	-0.277251	-0.112097	0.757377	-0.755102	0.346578	0.4	0.201789	748.75	-0.482167	6.97268	6.73866	7.02711	8.13822	0.736806	0.702426	0.911529	21.4514	19.9566	3.08	5.09164	-0.428267	34.3685	2.71245	20.6373	8.13822	19.9272	18.9546	20.2674	7.09397	9.08055	34.2466	6.97268	6.89643	20.5989	24.0013	24.6619	23.3228	27.1229	25.6925
950	828	601	615	691	735	755	183	53	374	0.0123254	-0.146814	0.0175945	0.853896	-0.778986	0.244444	0.223043	0.131503	25.5	0.260091	8.50403	9.10575	9.02462	9.39024	0.606452	0.625259	0.948713	35.8099	23.0487	3.08	5.67741	0.230994	69.3993	2.84587	24.0191	9.39024	55.8966	25.9944	28.8857	8.43901	2.94338	32.1107	8.50403	8.84082	20.7909	40.0426	22.3994	23.3656	23.0345	31.0342
3998	3893	4192	4297	4521	4764	4914	1740	23	3342	0.0668893	0.103615	0.0955133	0.95556	-0.553044	0.178365	-0.0810811	0.0236972	-13136.8	0.457111	16.2576	17.0012	16.8264	15.7312	-0.432819	0.562907	0.984962	56.3105	30.6079	3.05	12.0277	0.405931	12.1673	3.12808	23.0556	15.7312	19.2062	22.5023	16.3692	16.124	-23.5955	30.8518	16.2576	16.5353	36.1055	26.2091	25.4929	26.378	27.4872	27.2201
932	746	464	422	455	488	482	130	11	135	-0.0581528	-0.287317	-0.0830017	0.578692	-0.825737	0.507299	0.514721	0.183458	1553.5	-0.43621	7.50074	7.84059	7.87299	9.06942	0.801415	0.797544	0.833328	18.2064	19.5091	3	5.0658	-0.387427	37.6658	2.69203	19.6333	9.06942	38.2172	20.2451	22.3541	7.74175	11.5816	46.5892	7.50074	7.69137	17.6436	10.9898	22.5002	21.7301	24.4407	15.7072
1301	979	1012	1385	1594	1834	2240	489	12	1571	0.114998	0.131322	0.164186	1.63451	-0.500511	-0.104006	-0.360757	0.12	-9059	0.547577	11.1468	13.0843	12.2405	9.9295	-0.711877	-0.470275	1.17796	101.653	60.4635	3	7.87837	0.486291	40.4162	3.92492	30.9354	9.9295	6.62433	34.1143	36.7778	10.0398	-20.8462	20.3106	11.1468	11.6814	28.6498	113.377	47.6282	56.5366	24.9537	53.4789
2020	1857	1597	1525	1530	1566	1521	1091	1006	1254	-0.037013	-0.111976	-0.0528472	0.910991	-0.412493	0.0836682	0.157731	0.0461401	-1795.25	-0.375267	11.5104	11.5003	11.6126	12.2915	0.540305	0.437375	0.969404	21.2735	19.9297	3	10.2946	-0.333261	24.531	2.71123	25.1035	12.2915	26.1778	26.2496	25.2861	11.6888	-12.1537	30.365	11.5104	11.523	41.4612	18.3761	18.6624	20.4887	16.0271	13.8074
2316	2202	2084	2054	2101	2193	2207	1243	1015	1788	-0.0200685	-0.0475737	-0.0286549	1.0045	-0.435513	0.0564644	0.0453359	0.0176762	-4653.5	-0.306008	12.7116	13.0197	12.9921	13.0099	0.356572	0.383641	1.0015	25.7864	20.6989	3	10.752	-0.271751	27.0051	2.74568	25.786	13.0099	25.8388	27.1932	27.0323	12.7732	-16.6953	31.1969	12.7116	12.8078	41.8365	24.4518	19.2126	20.9898	16.9364	18.1095
1738	1506	1304	1256	1256	1296	1248	1120	1009	1087	-0.0259638	-0.0976676	-0.0370701	0.93538	-0.256308	0.0649462	0.130631	0.0659026	-1906.75	-0.333432	10.7894	10.7664	10.9027	11.4624	0.507398	0.401962	0.977978	22.2173	20.0757	3	10.385	-0.296112	24.6539	2.71784	25.1321	11.4624	22.2964	25.962	25.0065	10.9251	-12.4003	27.18	10.7894	10.7894	39.5418	20.5187	18.8435	20.4322	16.8356	15.7222
3321	3361	3345	3504	4436	5025	5402	1684	1012	3007	0.163018	0.160694	0.232777	0.866824	-0.498959	0.21437	-0.0903924	0.0872502	-12103.2	0.615148	15.1887	17.5463	17.1282	14.9792	-0.448791	0.598487	0.953477	27.856	21.1117	3	11.8973	0.546275	6.32661	2.76381	26.6025	14.9792	20.4344	28.0011	20.2971	14.9554	-22.9598	32.4917	15.1887	16.431	22.8344	29.618	25.2122	23.1217	27.0999	28.7911
5646	5660	6109	6207	6650	7110	7488	2339	23	5058	0.05007	0.0880528	0.0714975	0.94521	-0.586749	0.14351	-0.0600349	0.00735264	-18489.8	0.415047	18.3778	19.5639	19.229	17.8213	-0.391563	0.523553	0.981392	41.4042	24.7446	3	13.2743	0.368575	20.2631	2.91402	24.702	17.8213	24.2558	25.5126	23.0706	18.2806	-26.443	24.0549	18.3778	18.805	25.7017	24.8947	31.7943	29.0251	34.3128	31.8083
819	639	435	359	363	394	356	109	8	108	-0.121134	-0.304082	-0.172884	0.59824	-0.829421	0.518931	0.516014	0.142857	1357.75	-0.557081	7.10719	7.08734	7.33104	8.61325	0.802085	0.803594	0.842607	16.3631	19.2962	3	4.77686	-0.494791	33.2246	2.6822	19.5315	8.61325	40.7713	20.423	21.4888	7.57698	11.0732	43.7899	7.10719	7.13349	18.8751	-12.9009	23.6249	22.206	25.702	-0.184589
1857	1681	1521	1464	1519	1571	1543	1102	1007	1234	-0.011976	-0.0619078	-0.0170994	0.886869	-0.344438	0.0923134	0.121414	0.0469925	-2308.75	-0.257628	11.3548	11.5555	11.625	11.8902	0.495173	0.451948	0.960771	22.1437	20.0641	3	10.3291	-0.22879	23.3235	2.71731	25.301	11.8902	27.0288	26.5919	25.2932	11.5003	-13.2168	29.0269	11.3548	11.4953	37.7656	20.094	18.6894	20.4346	16.2593	15.0259
934	1008	675	1351	2578	3056	3632	469	11	381	0.635922	0.501114	0.907992	0.37059	-0.534722	0.776801	-0.054409	0.492195	-2270	0.968339	11.0548	15.3715	14.5117	10.0266	-0.378928	0.919256	0.718287	116.476	74.1477	3	7.76946	0.85994	52.7638	4.20113	48.9083	10.0266	103.045	27.7237	31.321	8.77205	-13.1424	14.1088	11.0548	13.7118	22.5465	238.392	55.0959	70.7453	-33.4937	-9.93603
1027	878	605	548	599	640	617	126	44	265	-0.042205	-0.224547	-0.0602465	0.67446	-0.856492	0.354446	0.401437	0.133548	1144.25	-0.392022	8.18327	8.51324	8.61774	9.57557	0.737687	0.707701	0.876972	1.68149	18.6679	3	5.0133	-0.348167	41.2512	2.65276	19.0577	9.57557	46.7027	20.5218	23.3335	8.45769	10.4594	49.4345	8.18327	8.42964	20.8412	8.19404	20.6888	20.8154	21.6329	11.6835
991	801	535	482	521	511	468	103	13	195	-0.0459433	-0.242824	-0.0655796	0.659836	-0.871411	0.42899	0.426536	0.160455	1257.75	-0.403264	7.84059	7.76394	7.99479	9.28704	0.752752	0.754193	0.870587	12.0802	18.917	3	4.68755	-0.358158	45.1717	2.66451	19.2152	9.28704	36.5933	19.5242	23.0016	8.11804	10.7944	47.6322	7.84059	8.0466	19.5776	7.58344	21.4692	21.1989	22.9505	12.3133
973	758	612	591	662	721	710	186	42	382	0.0231445	-0.0836312	0.033039	0.814353	-0.754617	0.253177	0.184375	0.137421	-266.75	0.32088	8.39194	8.92112	8.96696	9.11779	0.56916	0.632618	0.933836	43.9421	25.6047	3	5.70827	0.284981	72.1306	2.94741	25.3971	9.11779	29.5102	26.8912	29.1985	8.49018	-6.43727	17.8557	8.39194	8.71537	20.4132	24.6577	24.3731	25.5354	25.5062	24.813
1544	1524	1392	1249	1167	1169	1198	197	14	786	-0.131247	-0.175472	-0.187389	0.999065	-0.870735	0.152561	0.175926	-0.0316843	-604.75	-0.572244	10.7693	10.6207	10.5343	11.5079	0.560329	0.534336	0.999688	0.0503373	18.7152	2.99	5.81865	-0.508195	21.7518	2.655	24.3175	11.5079	50.6982	26.3018	24.4645	11.1655	-8.45653	31.4358	10.7693	10.5283	46.3028	4.60668	18.6008	20.054	16.7792	5.47524
804	570	349	297	295	299	262	56	5	70	-0.134959	-0.363636	-0.192588	0.469925	-0.901754	0.583333	0.640288	0.210407	1521	-0.577488	6.67194	6.39883	6.68688	8.29134	0.861903	0.83555	0.777457	10.576	18.8221	2.92	3.82586	-0.512941	45.0915	2.66005	18.929	8.29134	20.0143	16.4047	20.0127	7.04058	11.5003	40.0161	6.67194	6.65693	16.6533	-3.2902	24.5068	22.4101	26.1795	7.36037
768	508	294	260	328	345	286	68	5	73	-0.0103093	-0.276382	-0.0147108	0.416667	-0.866142	0.595568	0.617834	0.284672	1279.25	-0.245026	6.3825	6.58853	7.01358	7.97911	0.851708	0.841351	0.746901	20.4952	19.8151	2.88	4.08166	-0.217642	67.5218	2.70603	20.1179	7.97911	6.99992	15.5859	20.6656	6.6494	10.8555	34.4718	6.3825	6.89643	2.50738	7.8234	24.5633	23.5068	27.1366	15.7712
1723	1738	1603	1705	2056	2397	2750	1355	293	1778	0.107212	0.0670961	0.153081	1.08199	-0.220368	0.0557621	-0.106197	0.0730085	-7038.5	0.534943	11.9465	14.0102	13.3831	12.0231	-0.473555	0.382044	1.02662	6.49476	18.6649	2.77	11.0657	0.47506	10.2134	2.65262	27.2992	12.0231	47.8213	29.4965	23.8414	11.7034	-19.1643	27.8318	11.9465	12.7157	26.805	41.4911	19.0554	20.1406	18.1282	28.0407
741	567	363	299	262	246	348	250	9	163	-0.1616	-0.367913	-0.230607	1.15649	-0.559083	0.232941	0.303448	0.160208	542.25	-0.613231	6.68688	7.03385	6.26583	8.27677	0.671988	0.615293	1.04966	121.698	79.4283	2.72	6.29961	-0.544687	16.4977	4.29858	86.5727	8.27677	43.0689	101.597	114.22	7.13349	8.15455	32.3502	6.68688	6.39883	24.5259	-11.6741	93.73	84.2758	60.8138	29.8375
1984	1850	1820	1756	1795	1893	1909	446	24	1329	0.0143515	0.00617781	0.0204915	0.947678	-0.758919	0.169894	0.0206897	0.0289449	-3823	0.273647	12.0645	12.4051	12.3704	12.276	0.274527	0.55385	0.982246	69.0516	37.1694	2.69	7.64032	0.243014	36.9351	3.3373	26.5944	12.276	28.9495	28.5015	30.6021	12.2093	-15.6363	30.1795	12.0645	12.1531	40.8501	20.525	26.9755	29.9179	25.0353	22.0535
963	759	588	571	664	723	718	129	20	371	0.0183639	-0.108839	0.0262143	0.867213	-0.83004	0.243629	0.178571	0.144416	-252.75	0.297061	8.29619	8.9545	8.97524	9.1218	0.563124	0.624563	0.95362	43.4306	25.4268	2.69	5.05277	0.263829	85.5189	2.94056	25.3379	9.1218	32.7382	26.995	26.1992	8.37772	-6.32262	17.1229	8.29619	8.72414	17.6735	26.3665	24.2266	25.3982	25.2843	25.6042
863	683	498	490	515	561	551	198	56	305	-0.0142566	-0.170523	-0.0203496	0.933884	-0.710102	0.226869	0.203524	0.149808	-35.75	-0.273014	7.88374	8.19818	8.24747	8.80657	0.588219	0.6099	0.977457	22.1107	20.0588	2.69	5.82848	-0.242478	37.7229	2.71708	23.2692	8.80657	40.581	24.8296	26.9973	7.92641	-3.29427	17.4146	7.88374	8.01559	21.62	30.8963	22.1606	22.3635	23.5978	26.7869
1031	808	611	571	691	751	708	138	36	323	0.0332278	-0.106092	0.0474333	0.735069	-0.829208	0.338115	0.254658	0.158981	260.5	0.361988	8.29619	8.91274	9.08964	9.31402	0.633849	0.696661	0.902491	46.0622	26.3667	2.68	5.16765	0.32149	86.9281	2.97636	26.847	9.31402	27.4134	28.7814	27.017	8.48556	6.38659	39.7368	8.29619	8.84082	15.4521	16.1589	24.6588	25.7683	25.9925	20.1703
840	617	418	383	337	352	317	127	9	159	-0.202878	-0.380313	-0.289531	0.931408	-0.794165	0.270642	0.410286	0.143881	929.5	-0.661554	7.26217	6.81846	7.0607	8.51324	0.743068	0.646842	0.976592	9.14627	18.7503	2.57	5.02653	-0.587595	23.4345	2.65666	19.3307	8.51324	25.3211	17.9634	15.807	7.47697	9.75925	39.4793	7.26217	6.95894	29.3162	13.6722	23.6972	22.0509	25.6201	18.3359
817	629	467	423	360	356	335	89	7	139	-0.203608	-0.341151	-0.290592	0.624595	-0.858506	0.379464	0.530414	0.0932039	1284.5	-0.662361	7.50666	6.94515	7.08734	8.56808	0.809478	0.723975	0.854803	3.86278	18.6413	2.56	4.46475	-0.588299	29.5176	2.6515	18.9166	8.56808	37.8884	19.329	19.3109	7.7584	10.8704	44.8305	7.50666	7.11379	33.8672	9.90101	23.2597	21.9187	25.2692	15.6551
1094	926	716	872	1165	1227	1264	379	11	611	0.220044	0.0948192	0.314149	0.955357	-0.590713	0.29405	-0.0721443	0.214482	-2536.25	0.679796	9.55371	10.8122	10.7057	9.74699	-0.416294	0.664977	0.984892	85.2354	47.5637	2.44	7.2368	0.603721	55.881	3.6232	32.1518	9.74699	40.7088	35.4505	38.3312	8.94618	-13.6374	15.0748	9.55371	10.5223	15.8283	86.1567	38.7071	43.8655	34.0154	55.6539
6243	6187	6506	6457	6944	7430	7731	2026	18	4118	0.03098	0.0560683	0.0442381	0.855244	-0.672539	0.253986	0.0220534	0.00584483	-11987	0.35367	18.6213	19.7733	19.5132	18.3581	0.28043	0.633291	0.949212	64.5915	34.71	2.38	12.6536	0.314071	19.0859	3.26201	22.9221	18.3581	31.5169	23.7142	20.6099	18.6683	-22.886	20.5322	18.6213	19.0782	23.9665	28.9522	32.3119	32.0447	37.6539	36.6477
1437	1279	1209	1109	1100	1148	1199	306	15	785	-0.0211149	-0.0492207	-0.0301466	0.948231	-0.760751	0.192387	0.0756939	0.0355006	-1728.5	-0.311228	10.3509	10.6236	10.4708	10.8548	0.423013	0.577287	0.982437	0.980874	18.6853	2.27	6.73866	-0.276395	26.7033	2.65359	25.3011	10.8548	35.8093	27.0903	26.8374	10.6531	-12.0012	26.1852	10.3509	10.3228	38.6558	9.2764	18.6898	20.1077	16.9792	8.76734
800	602	463	424	383	410	400	121	12	184	-0.133415	-0.259414	-0.190417	0.827684	-0.799003	0.315985	0.345251	0.109615	641.5	-0.57531	7.51257	7.36806	7.42896	8.44369	0.701528	0.681118	0.938905	3.31038	18.6441	2.27	4.94609	-0.510977	29.9805	2.65163	19.547	8.44369	34.0468	19.5991	19.7339	7.73619	8.62447	38.9192	7.51257	7.26217	29.4879	12.7674	22.921	22.0918	25.0003	17.28
1451	1391	1132	951	794	824	782	141	17	476	-0.219171	-0.314745	-0.312904	0.849655	-0.898634	0.207327	0.386148	-0.0198198	1609.75	-0.678896	9.83392	9.21303	9.3751	11.1629	0.728201	0.59186	0.94714	4.41449	18.6412	2.24	5.20483	-0.602922	20.6684	2.6515	18.6791	11.1629	49.1631	20.3618	17.4291	10.4219	11.7198	65.3439	9.83392	9.25991	53.3627	-11.2348	19.5506	20.0417	19.6917	-3.72734
817	748	525	1004	1742	2086	2472	477	10	378	0.608063	0.484493	0.868175	0.428505	-0.362299	0.701422	-0.104728	0.477742	-2278	0.953972	10.0133	13.5212	12.7773	9.07752	-0.471361	0.888505	0.753909	99.2864	58.4574	2.24	7.81339	0.847194	51.4221	3.88102	38.7102	9.07752	77.1199	34.3585	37.4851	8.06714	-13.1578	8.65725	10.0133	12.0323	13.5054	226.186	44.8254	57.3722	-14.1955	6.52667
923	772	646	520	386	388	323	64	6	136	-0.321063	-0.398551	-0.458278	0.527108	-0.917098	0.418803	0.630412	-0.0145269	1931	-0.77098	8.04145	6.86121	7.29363	9.17359	0.857449	0.748175	0.807793	2.47615	18.6534	2.17	4	-0.684747	26.8174	2.65207	18.4875	9.17359	48.6531	20.1097	19.3061	8.64459	12.4526	56.2141	8.04145	7.28108	50.2677	-21.6668	22.884	21.1957	24.5175	-8.11959
767	531	378	336	359	389	335	69	5	117	-0.0877698	-0.252358	-0.125258	0.62776	-0.870056	0.460829	0.454795	0.178261	927	-0.500344	6.95205	6.94515	7.29989	8.09776	0.769021	0.772408	0.856245	17.8026	19.4599	2.08	4.10157	-0.444408	46.9609	2.68976	20.013	8.09776	17.6333	17.5957	21.4292	7.23043	9.75049	37.211	6.95205	7.10719	14.5251	6.80764	23.7947	23.0855	26.1827	14.3457
760	534	351	296	307	290	282	69	7	152	-0.160331	-0.35533	-0.22879	0.84252	-0.870787	0.251232	0.427807	0.181818	798.5	-0.611616	6.66444	6.55767	6.61911	8.11298	0.753499	0.630993	0.944481	21.0459	19.8956	1.97	4.10157	-0.543257	38.1691	2.70969	20.5377	8.11298	21.6674	19.0972	21.3101	7.054	9.27737	34.3596	6.66444	6.746	14.1184	-5.57887	25.0165	23.3274	27.3075	6.60565
980	778	607	555	442	447	386	92	9	160	-0.23374	-0.347186	-0.333635	0.713528	-0.881748	0.404097	0.486151	0.0556204	1501.75	-0.693571	8.21797	7.28108	7.64603	9.19729	0.786304	0.739313	0.893587	25.9591	20.732	1.95	4.51436	-0.615996	26.65	2.74714	20.9723	9.19729	33.2843	21.3407	20.5815	8.467	11.4516	52.1357	8.21797	7.61741	45.5638	10.578	23.427	22.2314	25.5677	16.3273
2874	2760	2894	2993	3345	3502	3699	834	13	2499	0.0495895	0.0732035	0.0708088	1.04819	-0.697826	0.122388	-0.096563	0.0237814	-10031.2	0.41371	14.4113	15.4654	15.1858	14.0272	-0.458779	0.496493	1.01581	51.4432	28.4784	1.82	9.41287	0.367392	20.4686	3.05378	23.8672	14.0272	21.0112	23.9508	21.3824	14.2506	-21.5668	32.4541	14.4113	14.9554	32.936	30.0119	22.6369	24.1611	22.3895	25.3854
2846	2743	2728	2638	3076	3363	3527	531	14	2294	0.132729	0.130035	0.189525	0.912153	-0.806416	0.216664	-0.0845987	0.0803203	-9227.25	0.57441	13.8174	15.2219	14.9822	13.9983	-0.43899	0.600614	0.969816	35.0845	22.849	1.79	8.09776	0.5101	37.5454	2.83763	25.4909	13.9983	21.4672	26.4194	28.5803	13.9727	-20.9745	32.3032	13.8174	14.5433	29.7983	21.9297	21.1853	22.1983	21.2537	19.9541
1274	1300	1186	1024	687	716	602	120	10	303	-0.346962	-0.386667	-0.495341	0.671304	-0.907692	0.309795	0.542112	-0.123904	2679	-0.791228	10.0794	8.44369	8.94618	10.9139	0.815385	0.676641	0.875601	34.3661	22.6557	1.79	4.93242	-0.702685	15.7185	2.82961	22.8989	10.9139	69.0673	24.7374	20.4834	10.5851	13.8886	72.2528	10.0794	8.82373	81.8083	-4.7401	22.1875	21.6668	24.0028	4.57263
856	614	444	394	370	372	330	91	9	200	-0.154746	-0.307774	-0.220855	0.938462	-0.851792	0.238095	0.336235	0.141614	604.75	-0.604462	7.33104	6.91042	7.19197	8.49942	0.695367	0.619798	0.979051	16.8281	19.3471	1.73	4.49794	-0.536875	33.3564	2.68455	20.2171	8.49942	18.6833	18.1011	19.123	7.62888	8.45653	37.5772	7.33104	7.17905	25.3335	5.06611	23.5488	22.3959	25.7486	12.8372
858	635	448	378	387	392	357	68	10	183	-0.153153	-0.317427	-0.218582	0.857143	-0.892913	0.285156	0.384951	0.139702	826.5	-0.602382	7.23043	7.09397	7.31861	8.59524	0.727448	0.658205	0.949914	0.57959	18.6973	1.7	4.08166	-0.535027	39.1888	2.65415	19.3839	8.59524	25.6949	18.1023	20.5376	7.65172	9.38457	40.0747	7.23043	7.28736	18.9894	-7.66397	22.8961	21.9112	24.9376	3.16772
2518	2270	2245	2374	2395	2513	2664	671	18	2141	0.15267	0.147258	0.217996	1.12312	-0.704405	0.175746	-0.203509	0.107533	-11291.2	0.601842	13.3401	13.8626	13.5956	13.1424	-0.588204	0.560138	1.03946	61.39	33.0525	1.7	8.75469	0.534464	28.5159	3.20924	23.1506	13.1424	17.5998	22.4286	22.3153	13.094	-22.4344	31.5935	13.3401	13.3794	44.0309	36.1678	23.6713	26.5413	20.4011	27.1093
893	841	578	647	860	914	959	342	9	337	0.215739	0.0316638	0.307987	0.729911	-0.593341	0.453366	0.125084	0.214941	-402.75	0.675322	8.64904	9.86142	9.7047	9.43913	0.500111	0.768215	0.900375	82.7608	45.8251	1.62	6.99319	0.599759	60.8438	3.5785	36.1479	9.43913	77.1035	32.7035	35.4921	8.32995	-7.38491	15.5565	8.64904	9.50969	12.5173	64.564	40.0554	42.9957	44.1832	57.1703
771	608	430	348	271	286	235	49	7	93	-0.314985	-0.461538	-0.449504	0.723214	-0.919408	0.413249	0.579221	0.0727763	1472.25	-0.766028	7.03385	6.17101	6.58853	8.47165	0.833581	0.744853	0.897613	0.220816	18.7091	1.6	3.65931	-0.680398	31.6756	2.65471	18.8454	8.47165	47.2747	20.3502	21.0033	7.54784	11.3761	44.3422	7.03385	6.47127	36.1061	-17.6102	24.9237	22.087	25.4884	-4.05077
998	900	746	645	477	535	428	64	7	175	-0.295139	-0.378254	-0.421302	0.593596	-0.928889	0.39759	0.577564	-0.0303867	2053.25	-0.74966	8.64012	7.53612	8.11804	9.65489	0.832786	0.735324	0.840421	37.1778	23.4379	1.41	4	-0.665797	28.5347	2.8618	23.9108	9.65489	60.0966	25.83	25.9704	9.06942	12.7101	59.9703	8.64012	7.81339	56.4758	-4.51379	24.8577	23.2644	27.1879	7.2845
2696	2560	2409	2631	3107	3414	3735	528	10	2347	0.154143	0.124337	0.2201	1.00091	-0.79375	0.166844	-0.124786	0.10786	-10196	0.603773	13.8051	15.5154	15.0576	13.6798	-0.499715	0.550516	1.0003	53.3794	29.3005	1.27	8.08248	0.536177	38.3864	3.08289	23.7158	13.6798	21.455	23.7766	26.0552	13.4054	-21.6842	31.9024	13.8051	14.592	28.8479	40.316	22.5136	24.4278	21.362	29.9031
1075	930	853	770	758	833	812	254	11	545	-0.0743073	-0.117117	-0.106082	0.948299	-0.726882	0.148438	0.143208	0.0295791	-750.5	-0.473385	9.16566	9.32936	9.40911	9.761	0.523186	0.529478	0.982461	13.6253	19.0352	1.25	6.33303	-0.420414	22.7903	2.67005	24.4732	9.761	46.4438	26.4218	24.9355	9.48381	-9.08762	22.0214	9.16566	9.11779	33.7578	5.81797	19.8721	20.8149	19.5163	8.43851
829	863	573	1107	2096	2470	3005	354	6	411	0.620278	0.478235	0.885632	0.463804	-0.589803	0.712185	-0.135704	0.481448	-2825.5	0.960324	10.3447	14.4305	13.5176	9.52073	-0.513882	0.893026	0.774066	93.6632	53.8892	1.17	7.07404	0.852829	69.1957	3.77718	35.0279	9.52073	104.445	23.7209	27.0764	8.30587	-14.1373	10.043	10.3447	12.7977	17.8015	228.897	39.135	51.0013	-16.9301	3.69959
976	742	575	535	520	548	525	142	35	278	-0.105769	-0.229495	-0.150976	0.911828	-0.808625	0.251682	0.272727	0.112312	391.25	-0.53248	8.11804	8.06714	8.18327	9.05318	0.648499	0.63137	0.969701	11.9833	18.9103	1.07	5.2171	-0.472919	29.7259	2.66419	20.1311	9.05318	23.8642	18.8645	18.8823	8.31552	7.31394	40.5513	8.11804	8.04145	28.5134	15.3948	21.4752	21.4496	22.8256	17.2279
924	722	561	579	634	716	706	243	83	384	0.0434783	-0.0824588	0.0620643	0.916667	-0.663435	0.228916	0.125487	0.155756	-565	0.395926	8.33476	8.90434	8.94618	8.9711	0.500649	0.611728	0.971413	56.036	30.4822	1.05	6.24025	0.351634	64.8574	3.12379	27.0398	8.9711	33.3507	29.2493	32.1199	8.24747	-8.26703	13.988	8.33476	8.59072	21.5524	42.7801	28.5248	29.716	31.3081	38.6325
1298	1558	1554	1204	675	698	560	143	18	287	-0.468115	-0.469118	-0.668333	0.721137	-0.908216	0.324706	0.586558	-0.250956	3678	-0.874308	10.6384	8.24257	8.87058	11.5928	0.837086	0.687327	0.896752	18.294	19.52	1.04	5.22932	-0.776457	8.25387	2.69253	18.7473	11.5928	96.8974	21.0559	12.8023	11.5829	15.4361	81.0858	10.6384	8.77205	114.524	-24.8121	20.56	20.2631	21.7237	-13.0014
1035	942	656	609	639	669	622	137	36	278	-0.0614887	-0.237845	-0.0877754	0.734483	-0.854565	0.351981	0.377193	0.103519	1154.5	-0.444417	8.47629	8.53618	8.74598	9.8028	0.722528	0.706057	0.902251	17.7295	19.4512	1	5.15514	-0.394698	36.0053	2.68936	19.8296	9.8028	59.6913	22.2122	23.9891	8.68896	10.4905	51.255	8.47629	8.61325	25.1803	14.0423	20.7709	20.9605	21.6929	15.5012
1197	988	731	719	620	641	565	114	12	285	-0.160317	-0.302571	-0.228856	0.810964	-0.884615	0.299754	0.394495	0.0828105	1320	-0.611675	8.95866	8.26703	8.62222	9.95984	0.733411	0.66925	0.932539	48.6715	27.3588	1	4.84881	-0.543242	28.6363	3.01323	28.3943	9.95984	30.2409	31	31.5775	9.00822	10.9696	54.8021	8.95866	8.52702	44.1507	28.3628	26.1249	25.4939	29.3184	29.8263
1992	2011	1939	1841	1731	1838	1830	387	22	1300	-0.099518	-0.117533	-0.142094	1.01574	-0.807558	0.099723	0.109823	-0.0399571	-2380	-0.521826	12.2561	12.2316	12.2494	12.6223	0.478885	0.46373	1.00522	30.3517	21.6595	1	7.28736	-0.463412	16.1281	2.78751	25.0749	12.6223	39.9064	26.9586	23.2162	12.4698	-13.3514	31.9304	12.2561	12.0069	50.6648	17.5668	19.073	21.0531	16.2381	13.4738
1272	1646	2150	1852	972	998	634	88	10	120	-0.476648	-0.36711	-0.680554	0.283465	-0.946537	0.727891	0.767991	-0.357752	5199.5	-0.879605	12.2804	8.59072	9.99333	11.8071	0.915768	0.899543	0.656901	125.608	83.5397	1	4.44796	-0.781147	13.6726	4.37151	106.652	11.8071	111.254	34.244	30.8572	12.9066	17.3242	90.5903	12.2804	9.90578	149.088	1.6234	78.2275	74.1946	86.0901	60.7073
769	553	350	295	245	252	217	65	11	123	-0.225919	-0.428941	-0.322371	0.782805	-0.882459	0.284884	0.523416	0.171598	1126.5	-0.685676	6.65693	6.00925	6.31636	8.20808	0.805902	0.657995	0.921619	1.53751	18.6711	1	4.02073	-0.609048	33.3965	2.65292	19.076	8.20808	26.2344	17.7607	18.783	7.0473	10.405	37.1771	6.65693	6.25732	27.7799	-5.68092	25.4887	22.4523	25.7834	5.30892
721	503	308	257	253	264	226	58	7	75	-0.182342	-0.405028	-0.26017	0.605634	-0.884692	0.479167	0.591772	0.205161	1236.5	-0.63839	6.35786	6.0912	6.41507	7.95285	0.83956	0.78252	0.846064	10.444	18.8147	1	3.87088	-0.567059	39.3608	2.6597	19.1286	7.95285	23.5949	17.3713	19.8495	6.75331	10.7333	35.1843	6.35786	6.3247	14.6293	-6.80665	25.4014	22.9413	26.7872	5.28689
1585	1462	1377	1545	2136	2451	2654	501	52	1549	0.210662	0.181869	0.300789	0.999053	-0.657319	0.153783	-0.181411	0.146179	-7379.75	0.670019	11.5605	13.8452	13.4828	11.3496	-0.566093	0.535759	0.999684	56.4129	30.6549	1	7.94229	0.595016	42.1688	3.12968	24.1419	11.3496	37.3956	25.7135	28.5907	11.1253	-19.4692	25.6078	11.5605	12.8786	19.8145	55.7941	22.5248	26.13	16.1045	32.9088
1423	1191	1268	1230	1309	1450	1545	379	164	1216	0.0734381	0.104511	0.104853	1.30225	-0.68178	0.0942272	-0.232603	0.0655859	-6599.25	0.471549	10.7144	11.5605	11.3185	10.6	-0.614995	0.45505	1.09202	34.6941	22.7434	1	7.2368	0.418768	49.0158	2.83325	25.374	10.6	24.3453	26.4912	30.0195	10.8236	-18.7571	24.3347	10.7144	10.9391	33.6916	22.2384	19.6916	21.9198	16.4793	16.4702
801	609	449	402	449	463	450	127	7	174	-0.0429733	-0.192948	-0.0613354	0.640777	-0.791461	0.406143	0.395189	0.149218	798.5	-0.39437	7.38032	7.66309	7.73619	8.47629	0.73384	0.740559	0.862122	5.84594	18.6534	1	5.02653	-0.350267	40.9143	2.65208	19.3732	8.47629	36.3289	19.6859	22.4494	7.65741	9.27737	39.8551	7.38032	7.65741	14.8382	7.23718	22.0803	22.051	23.6573	12.6393
3871	3876	3790	3636	4539	5072	5238	1565	1012	3387	0.150605	0.139623	0.215054	0.845345	-0.596233	0.205023	-0.0564752	0.085921	-12453.8	0.599123	15.3771	17.3669	17.1814	15.7083	-0.383665	0.589659	0.945536	23.7475	20.3292	1	11.6102	0.532043	7.20959	2.72923	27.1534	15.7083	18.4036	28.6901	21.5477	15.5912	-23.1793	31.7804	15.3771	16.5572	23.1396	24.1093	25.7816	24.3801	28.5563	26.868
879	591	443	403	392	417	379	88	10	198	-0.091133	-0.23125	-0.130069	0.883469	-0.8511	0.301587	0.288986	0.169634	423.25	-0.50667	7.38644	7.2368	7.471	8.39194	0.661138	0.670612	0.959541	19.2968	19.6492	1	4.44796	-0.450013	41.2281	2.69845	20.7035	8.39194	2.19985	15.5184	18.427	7.62315	7.50814	35.255	7.38644	7.31861	23.3831	11.3964	23.4137	22.7293	25.6711	16.934
1367	1458	1139	1793	1929	2046	1558	205	14	533	0.203497	0.0827304	0.29055	0.424753	-0.859396	0.527063	0.332115	0.15095	1012	0.662328	12.1486	11.5928	12.6951	11.3393	0.692516	0.80777	0.751702	342.429	522.118	814.08	5.89637	0.588192	86.1379	8.05236	526.84	11.3393	72.2753	619.429	726.835	10.4434	10.0398	61.0113	12.1486	12.4483	36.0097	149.152	498.317	509.839	677.976	753.326
864	885	549	1190	1025	1127	730	84	11	193	0.221828	-0.0131654	0.316675	0.331787	-0.905085	0.634123	0.511529	0.22238	1649.75	0.681613	10.597	9.00411	10.4066	9.60095	0.799754	0.859128	0.692287	391.202	677.771	501.85	4.37952	0.605349	131.24	8.78404	668.781	9.60095	97.813	616.478	524.084	8.18824	11.8161	50.9373	10.597	10.0826	54.4676	267.887	671.685	670.012	637.749	579.399
1032	904	623	1022	774	825	605	113	10	202	0.0142405	-0.170227	0.0203286	0.460218	-0.875	0.520759	0.507923	0.146283	1720.25	0.27292	10.0728	8.45769	9.37889	9.66918	0.797871	0.804536	0.772066	252.071	289.066	381.63	4.83459	0.242387	89.1526	6.61199	321.797	9.66918	51.6637	414.404	410.929	8.54075	11.982	54.1376	10.0728	9.1815	66.2932	175.667	308.654	303.29	305.961	277.558
838	814	513	966	744	776	517	102	16	173	0.0984183	-0.131341	0.140488	0.4704	-0.874693	0.566416	0.469314	0.175573	1448	0.519853	9.88536	8.02596	9.1894	9.33702	0.77712	0.827393	0.777719	311.939	435.447	347.33	4.67233	0.461699	110.584	7.57958	457.389	9.33702	88.4539	397.857	328	8.0052	11.3133	48.0882	9.88536	9.06131	62.8209	221.239	459.085	451.48	375.502	318.361
864	841	541	923	689	721	480	135	11	138	0.0295964	-0.188693	0.0422475	0.390244	-0.839477	0.61236	0.579343	0.14127	1945	0.348284	9.73645	7.82974	8.96696	9.43913	0.83364	0.849185	0.730767	273.592	338.056	309.72	5.12993	0.309324	86.9705	6.9662	372.095	9.43913	86.6951	305.375	282.269	8.14828	12.4826	52.4507	9.73645	8.83228	65.2874	189.245	363.641	355.005	292.976	257.664
973	933	591	877	795	878	775	131	33	276	0.0990854	-0.128174	0.141448	0.581137	-0.859593	0.446339	0.380178	0.178025	1116.75	0.521033	9.57194	9.18545	9.57557	9.77148	0.724428	0.764226	0.8345	175.383	147.639	298.15	5.07875	0.462739	99.3815	5.28527	168.161	9.77148	75.0081	139.552	100.506	8.39194	10.3749	48.7073	9.57194	9.2638	43.3558	145.489	153.877	152.688	189.113	179.719
1685	1713	1554	1832	1668	1764	1547	248	17	917	0.0145847	-0.0341081	0.0208241	0.736875	-0.855225	0.271355	0.184647	0.0276865	-785.75	0.27512	12.2361	11.5655	12.0828	11.9652	0.56944	0.64741	0.903229	169.831	139.409	285.9	6.28276	0.244324	58.3179	5.18517	107.929	11.9652	50.3658	119.843	119.585	11.5829	-9.22773	32.3161	12.2361	11.8595	54.6219	65.056	127.834	131.637	167.74	160.981
779	716	436	813	544	575	372	74	8	112	0.0113379	-0.232358	0.0161826	0.367713	-0.896648	0.598566	0.627273	0.168336	1788.5	0.252939	9.33319	7.19197	8.31552	8.94618	0.856023	0.84276	0.716423	283.712	362.499	246.01	4.19834	0.224652	103.878	7.13021	393.903	8.94618	81.3932	361.827	305.952	7.58279	12.1384	46.7239	9.33319	8.16331	74.4411	218.3	396.982	384.412	227.32	180.207
1007	910	633	886	769	812	694	134	39	266	0.0523952	-0.128332	0.0747964	0.630156	-0.852747	0.45098	0.345159	0.149194	960.75	0.421334	9.60457	8.8536	9.32936	9.69052	0.701466	0.766866	0.857333	172.57	143.435	228.12	5.11723	0.374194	91.9588	5.23462	162.156	9.69052	59.9543	167.061	132.78	8.5862	9.86742	48.8807	9.60457	9.16169	47.8288	127.411	149.896	148.574	183.733	178.271
1008	891	672	883	733	788	624	74	10	290	-0.0752	-0.21307	-0.107349	0.714533	-0.916947	0.331797	0.366564	0.0825939	970	-0.475261	9.59372	8.54532	9.23653	9.6226	0.715677	0.692295	0.894007	161.018	126.902	210.93	4.19834	-0.422091	47.39	5.02524	143.861	9.6226	55.1198	155.334	166.252	8.75904	9.89898	50.2389	9.59372	9.01643	52.3526	108.378	132.187	130.732	162.059	160.582
1232	1189	937	1279	1004	1068	875	154	13	391	-0.0135208	-0.131842	-0.0193033	0.642544	-0.870479	0.399847	0.339718	0.0671976	1108.75	-0.268252	10.8548	9.56466	10.2217	10.594	0.69776	0.736712	0.862914	183.34	159.906	208.44	5.36011	-0.238233	44.1968	5.42777	181.558	10.594	60.5028	188.47	208.784	9.78543	10.3501	58.1866	10.8548	10.0133	67.4005	114.292	161.966	160.903	199.3	193.551
877	820	564	869	617	636	450	99	6	157	-0.0405904	-0.223881	-0.0579402	0.448077	-0.879268	0.536189	0.557455	0.106535	1786.25	-0.386955	9.54274	7.66309	8.59975	9.3599	0.823006	0.812405	0.765216	210.342	205.691	187.46	4.62607	-0.34367	47.2621	5.90299	236.571	9.3599	76.7909	201.806	222.21	8.26215	12.1334	52.3954	9.54274	8.51324	69.4804	157.283	225.2	218.573	215.401	199.682
931	916	639	952	686	711	542	118	9	277	-0.0614618	-0.237002	-0.0877363	0.667257	-0.871179	0.342043	0.41686	0.0785869	1253	-0.444351	9.83737	8.15329	8.92531	9.71177	0.747016	0.699348	0.873838	195.857	180.333	174.4	4.90487	-0.394641	39.2558	5.6497	204.98	9.71177	83.647	150.095	165.807	8.61325	10.7808	51.4546	9.83737	8.81945	70.3973	145.907	194.145	188.67	199.33	188.591
958	764	520	665	560	601	483	74	13	133	-0.130435	-0.312715	-0.186174	0.5425	-0.903141	0.500938	0.557594	0.132611	1722.25	-0.571005	8.72852	7.84601	8.43901	9.14179	0.823075	0.794197	0.81558	118.818	76.4858	144.92	4.19834	-0.507144	39.9613	4.24483	89.1055	9.14179	35.6849	111.934	120.606	8.04145	11.9867	50.2117	8.72852	8.24257	44.6695	102.652	78.946	76.9406	95.2197	104.79
828	796	468	809	471	466	318	117	7	120	-0.102473	-0.352591	-0.146258	0.430446	-0.853015	0.520958	0.658333	0.127273	2102.75	-0.526874	9.31786	6.82562	7.75286	9.26768	0.869925	0.804639	0.755045	216.651	217.313	144.07	4.89097	-0.467955	33.8794	6.01213	251.302	9.26768	87.0354	180.061	207.163	7.76394	12.8114	50.1701	9.31786	7.78049	91.4928	194.008	245.28	231.742	120.136	107.884
1345	1358	1146	1346	1074	1098	983	214	10	587	-0.0591497	-0.143098	-0.0844491	0.780943	-0.842415	0.268536	0.261496	0.0152524	383.25	-0.438731	11.0412	9.94301	10.3165	11.0739	0.639472	0.64516	0.920887	116.679	74.3478	144.01	5.98142	-0.389629	27.38	4.2049	79.4543	11.0739	63.4349	75.0484	80.951	10.4647	7.26375	54.3096	11.0412	10.2408	66.4384	70.0799	66.7681	67.1851	84.1031	90.1518
1122	962	733	877	685	705	595	125	19	295	-0.125096	-0.255875	-0.178578	0.715789	-0.870062	0.317919	0.40438	0.0715643	1262.25	-0.563131	9.57194	8.41083	8.90013	9.87169	0.739486	0.682505	0.89453	112.722	70.4984	141.51	5	-0.500128	30.1763	4.13104	80.1145	9.87169	41.9567	94.352	103.2	9.01643	10.8072	54.4297	9.57194	8.81516	58.7788	80.9719	69.1326	67.4097	83.8049	92.5307
903	812	620	761	630	636	514	124	10	214	-0.0662081	-0.198524	-0.0945104	0.53407	-0.847291	0.43461	0.473684	0.076694	1363.75	-0.455505	9.12981	8.0104	8.59975	9.32936	0.779524	0.757472	0.811333	122.938	80.7183	139.61	4.98663	-0.404548	37.4311	4.32173	92.8048	9.32936	66.1646	84.7584	90.747	8.52702	11.0895	51.6235	9.12981	8.57262	49.3088	89.6903	81.9995	80.822	101.402	108.246
1856	1756	1468	1599	1437	1457	1378	1058	1006	1118	-0.0378226	-0.126724	-0.0540024	0.853784	-0.397494	0.0980234	0.203564	0.0456688	-1038.75	-0.377982	11.6936	11.128	11.3367	12.0645	0.588257	0.46108	0.948672	69.5758	37.47	133.19	10.1897	-0.335673	23.8155	3.34627	29.5033	12.0645	34.008	32.4666	31.9829	11.3652	-10.1275	30.7086	11.6936	11.2846	54.4243	47.9325	28.3991	30.365	29.7002	39.733
730	495	296	323	397	439	400	52	6	106	0.0793157	-0.175772	0.113187	0.596542	-0.894949	0.532009	0.410256	0.290593	773.75	0.483726	6.86121	7.36806	7.60014	7.91046	0.743051	0.810288	0.841809	79.0981	43.3506	123.28	3.73251	0.429655	136.178	3.5129	46.1438	7.91046	16.1578	58.7829	11.3913	6.66444	9.18051	30.3173	6.86121	7.3496	6.7231	61.2045	45.5586	45.246	55.419	64.6865
728	549	329	399	306	325	269	58	6	70	-0.117148	-0.357231	-0.167165	0.515385	-0.894353	0.575758	0.607613	0.200486	1402.5	-0.55087	7.36192	6.45531	6.87534	8.18824	0.846985	0.831917	0.801759	71.9384	38.8546	121.58	3.87088	-0.489303	46.5731	3.38699	42.0933	8.18824	40.932	47.457	50.2912	6.90344	11.1935	37.875	7.36192	6.73866	40.6328	89.3392	43.2303	39.6489	46.2632	65.3485
1072	1000	871	1726	1641	1737	1880	379	14	2216	0.00740741	-0.0615711	0.0105752	3.08484	-0.621	-0.429677	-0.463375	0.0578691	-13223	0.219497	11.9954	12.342	12.0208	10	-0.773828	-0.754595	1.45572	236.693	256.557	117.07	7.2368	0.194935	40.7073	6.35421	148.695	10	62.6075	146.475	160.522	9.55006	-23.647	17.9567	11.9954	11.7951	48.6422	228.622	249.848	267.013	302.934	240.662
912	906	619	829	523	573	440	127	12	230	-0.129562	-0.310195	-0.184942	0.779874	-0.859823	0.349364	0.41784	0.05748	1384.25	-0.569743	9.39402	7.6059	8.30587	9.6763	0.747601	0.704302	0.920467	154.861	118.57	115.34	5.02653	-0.50601	29.4434	4.91275	137.342	9.6763	87.2106	89.0512	97.1024	8.52243	11.1448	51.736	9.39402	8.05689	82.2996	114.7	129.362	121.199	108.355	115.772
775	508	337	349	309	304	262	52	5	71	-0.136594	-0.329843	-0.194915	0.457031	-0.897638	0.565749	0.6256	0.209384	1304.75	-0.579805	7.04058	6.39883	6.72395	7.97911	0.855261	0.827068	0.77028	32.4134	22.1534	112.46	3.73251	-0.515003	46.3961	2.80854	22.581	7.97911	4.30073	19.2789	22.941	6.95894	10.9272	37.7029	7.04058	6.76061	26.9805	46.8252	26.6891	25.096	29.5872	39.1588
1930	1906	1537	1764	1511	1544	1384	1063	1007	1084	-0.0378123	-0.144401	-0.0539881	0.802105	-0.442288	0.135911	0.250246	0.0437082	-285.25	-0.377949	12.0828	11.1441	11.558	12.3986	0.630167	0.514144	0.929131	105.735	64.0387	108.3	10.2057	-0.335643	23.9266	4.00081	50.4595	12.3986	38.4933	58.6102	61.7674	11.5405	-6.58277	34.8957	12.0828	11.4751	62.1619	59.1465	51.6732	53.1746	63.3143	70.1715
998	829	614	715	539	534	459	107	11	221	-0.139147	-0.282289	-0.198622	0.665948	-0.870929	0.354745	0.456942	0.0869888	1356.25	-0.583458	8.94201	7.71384	8.11298	9.39402	0.77023	0.7079	0.873267	89.4232	50.6288	107.85	4.74746	-0.518192	31.7576	3.69941	56.3315	9.39402	42.1875	64.4319	68.706	8.49942	11.0691	51.3596	8.94201	8.13822	57.3041	75.0292	50.1671	48.0198	58.8849	71.5789
930	797	522	628	570	620	542	114	42	150	0.00760456	-0.201206	0.0108549	0.503774	-0.856964	0.558824	0.49812	0.166134	1575	0.221416	8.56354	8.15329	8.52702	9.27156	0.792705	0.823679	0.795692	105.881	64.1696	105.52	4.84881	0.196649	85.3046	4.00353	73.5319	9.27156	53.5624	77.2847	63.7981	8.05175	11.6348	49.3378	8.56354	8.29134	36.8766	85.275	64.5736	62.841	78.0412	88.8376
817	698	432	664	533	595	619	159	8	361	-0.13834	-0.361951	-0.197438	1.20489	-0.772206	-0.0494186	0.278388	0.139442	141.5	-0.582296	8.72414	8.52243	8.41083	8.87058	0.652956	-0.36697	1.0641	129.005	87.221	104.29	5.4175	-0.517189	24.6441	4.4348	90.2635	8.87058	61.5561	87.3306	95.6715	7.55953	5.21097	29.5115	8.72414	8.10791	49.1486	157.688	92.2261	90.2543	111.649	113.545
1306	1162	1052	1034	955	1032	996	131	11	640	-0.11029	-0.159102	-0.157459	0.969158	-0.887263	0.136885	0.17433	0.0105808	-590.75	-0.539994	10.1121	9.98665	10.1055	10.5132	0.55863	0.515369	0.989612	47.8318	27.033	95.64	5.07875	-0.479563	30.7919	3.00122	25.7204	10.5132	40.8712	27.7533	28.5918	10.1704	-8.39076	26.7334	10.1121	9.84769	44.4528	26.17	23.2273	24.5605	23.593	24.1902
1922	1979	1817	1963	1669	1815	1730	288	10	1160	-0.0631949	-0.105587	-0.0902309	0.88757	-0.854472	0.159725	0.164118	-0.0155093	-1358.25	-0.448523	12.521	12.0046	12.1981	12.555	0.547501	0.542572	0.961024	92.4093	52.9085	90.4	6.60385	-0.398316	22.0195	3.75412	37.4853	12.555	44.528	41.2403	41.4545	12.2026	-11.0746	32.743	12.521	11.8618	64.8917	43.143	40.2069	42.5848	45.7511	49.9754
1741	1659	1607	1678	1556	1570	1522	254	12	1041	-0.046224	-0.0620999	-0.0659986	0.967235	-0.846896	0.169194	0.0786736	-0.00124611	-2261	-0.404121	11.8831	11.5028	11.6225	11.8381	0.428492	0.553089	0.988957	74.716	40.5453	89.09	6.33303	-0.358885	25.9933	3.43542	29.2233	11.8381	38.2088	32.0154	32.0488	11.7131	-13.125	29.8394	11.8831	11.5879	51.2664	37.4517	30.2871	33.0848	30.3251	35.3241
1223	1087	955	1013	918	982	944	151	9	625	-0.0983324	-0.161945	-0.140384	1.01658	-0.861086	0.112846	0.153928	0.0247638	-754.75	-0.519724	10.0431	9.80974	9.93964	10.282	0.535927	0.483239	1.0055	67.7611	36.4399	87.15	5.32507	-0.461564	29.3506	3.31532	29.5003	10.282	44.3991	32.0912	32.919	9.84769	-9.10474	24.224	10.0431	9.71884	46.0083	46.0688	30.7667	32.1963	34.0958	42.2602
775	568	371	432	354	373	288	55	5	64	-0.119155	-0.32093	-0.170044	0.366438	-0.903169	0.640449	0.682963	0.179657	1595	-0.554014	7.55953	6.60385	7.1984	8.28164	0.880641	0.861976	0.715594	82.5364	45.6701	86.73	3.80295	-0.492082	47.4147	3.57446	50.7641	8.28164	30.0932	61.931	64.7052	7.18552	11.6839	41.8784	7.55953	7.07404	37.2707	77.813	49.3616	46.4481	55.8804	69.9929
789	572	365	406	388	386	363	245	8	150	-0.0595065	-0.276786	-0.0849226	0.87037	-0.571678	0.367089	0.339578	0.207813	666.5	-0.439549	7.40472	7.13349	7.28108	8.30103	0.697665	0.716017	0.954776	31.4724	21.9234	86.17	6.25732	-0.390411	24.9521	2.79878	22.5777	8.30103	26.3949	22.7052	21.5245	7.14657	8.73508	33.8867	7.40472	7.29363	24.704	65.4246	25.0466	24.3315	27.8638	45.2036
1378	1390	1226	1349	1148	1172	1102	211	8	715	-0.107498	-0.16905	-0.153477	0.911943	-0.848201	0.160305	0.213444	-0.0178497	-257.25	-0.535403	11.0494	10.3291	10.5433	11.1602	0.597624	0.543229	0.969741	87.8416	49.453	84.17	5.95334	-0.475481	22.6321	3.67055	39.5359	11.1602	61.6672	39.4915	39.6027	10.7028	-6.35992	31.6353	11.0494	10.4708	58.2884	52.7063	40.627	42.1607	47.8307	55.6418
1091	1016	736	792	637	700	619	98	6	260	-0.101796	-0.257426	-0.145319	0.656667	-0.903543	0.395349	0.441135	0.0692381	1623	-0.525743	9.25213	8.52243	8.87904	10.0531	0.761244	0.733939	0.869191	70.1693	37.8132	83.78	4.61044	-0.466922	37.5785	3.35646	41.1258	10.0531	61.1033	41.0778	43.6751	9.02871	11.7518	57.0448	9.25213	8.60425	53.158	52.0318	35.1625	33.8575	40.9595	50.0607
1005	942	809	876	937	1086	958	113	17	437	-0.0533854	-0.12882	-0.0762131	0.818432	-0.880042	0.249141	0.225764	0.0340299	4.5	-0.423978	9.5683	9.85799	10.2788	9.8028	0.608908	0.629238	0.935393	93.7365	53.947	82.44	4.83459	-0.376537	41.6038	3.77853	50.9177	9.8028	67.924	46.9003	49.8511	9.31786	1.65096	35.9045	9.5683	9.78543	29.1008	52.9142	47.242	50.1724	54.6418	61.0434
882	730	521	601	450	471	410	62	4	143	-0.157778	-0.316501	-0.2252	0.598945	-0.915068	0.452107	0.525601	0.0950934	1524	-0.6084	8.43901	7.42896	7.78049	9.00411	0.807022	0.767504	0.842938	74.6091	40.479	80.1	3.95789	-0.540358	40.5257	3.43355	44.2552	9.00411	49.2631	47.7165	50.6862	8.0466	11.5079	48.9524	8.43901	7.66309	53.3367	73.5508	41.1861	38.9038	47.2263	62.2621
3998	3977	4407	4894	5319	5712	6067	2760	66	2845	-0.0127542	0.0385592	-0.0182121	1.00535	-0.30601	0.203193	-0.0412247	-0.0303951	-10265.8	-0.2631	16.9781	18.2386	17.8757	15.8435	-0.34545	0.587899	1.00178	38.8993	23.9512	79.03	14.0272	-0.233642	72.4856	2.88254	25.0829	15.8435	18.537	25.5185	28.0577	16.3951	-21.7335	29.7429	16.9781	17.4559	29.9108	25.2437	27.5029	24.7656	28.9543	27.8185
1114	1020	792	870	686	715	625	126	11	384	-0.128205	-0.25	-0.183021	0.859477	-0.876471	0.228916	0.319534	0.0429003	767	-0.567763	9.5464	8.54988	8.94201	10.0662	0.683658	0.611728	0.950776	88.1119	49.6524	77.75	5.0133	-0.504237	29.7221	3.67547	53.4421	10.0662	56.2262	54.6759	57.7659	9.25213	9.15374	51.7854	9.5464	8.81945	57.5362	56.933	46.3642	45.0605	55.5623	63.2828
852	748	510	657	440	444	330	76	9	172	-0.149944	-0.329778	-0.214016	0.62069	-0.898396	0.373406	0.523422	0.0929302	1488.75	-0.598158	8.69338	6.91042	7.62888	9.07752	0.805905	0.720102	0.853018	139.399	99.1166	77.07	4.23582	-0.531263	37.3299	4.62788	115.268	9.07752	64.8071	107.997	117.1	7.98957	11.4185	48.2413	8.69338	7.6059	67.3792	104.867	109.519	102.651	101.064	109.6
1109	1009	872	883	743	756	703	136	11	418	-0.106599	-0.17805	-0.152182	0.860795	-0.865213	0.254902	0.249536	0.0193984	286.5	-0.533893	9.59372	8.89171	9.10977	10.0299	0.62957	0.634051	0.951262	54.4744	29.7801	76.5	5.14256	-0.474152	30.4627	3.09962	30.1819	10.0299	55.1847	31.9697	33.0251	9.55371	6.59237	47.6153	9.59372	9.05725	50.9344	34.793	26.793	27.1862	29.827	33.6069
2505	2208	1861	2141	2552	2656	2670	1229	1009	1779	0.230674	0.148312	0.329373	0.848505	-0.443388	0.251892	-0.0671736	0.191221	-6908.5	0.690604	12.8886	13.873	13.8487	13.0217	-0.406505	0.631546	0.946713	90.6206	51.5335	75.75	10.7115	0.61329	8.69943	3.72132	29.1495	13.0217	15.0992	31.6096	25.757	12.3003	-19.0456	29.6625	12.8886	13.6655	28.3103	55.5297	35.9116	40.6564	31.6203	44.3499
908	748	575	658	515	527	467	119	9	288	-0.102589	-0.230263	-0.146437	0.895299	-0.840909	0.238095	0.281919	0.0894695	407	-0.527088	8.69778	7.7584	8.07737	9.07752	0.655705	0.619798	0.963805	84.1551	46.7981	74.67	4.91868	-0.46813	33.5263	3.60365	48.7172	9.07752	46.3186	53.6896	56.8731	8.31552	7.4108	40.7782	8.69778	8.01559	51.3744	70.6774	46.5201	45.0529	55.5252	67.777
858	612	408	416	336	349	260	69	8	75	-0.192982	-0.378378	-0.275407	0.438406	-0.887255	0.57265	0.66985	0.163077	1688.75	-0.650616	7.46502	6.3825	7.04058	8.49018	0.874969	0.830417	0.759671	61.7702	33.2447	74.38	4.10157	-0.577882	35.0895	3.21544	35.6052	8.49018	17.2543	41.8439	44.2592	7.41686	11.9084	44.6132	7.46502	6.95205	37.537	41.5799	36.3787	33.317	39.3588	44.2787
755	541	356	362	292	279	221	52	6	90	-0.20678	-0.396129	-0.295067	0.512821	-0.903882	0.444444	0.636914	0.162845	1378	-0.665744	7.12694	6.04594	6.53434	8.14828	0.860386	0.763143	0.800427	46.5388	26.5435	74.03	3.73251	-0.591338	39.1412	2.98299	27.4785	8.14828	26.6457	29.6364	32.0963	7.08734	11.128	39.4614	7.12694	6.63429	34.4162	41.7163	30.9179	28.1798	33.2735	39.643
1007	927	664	734	625	657	584	106	28	243	-0.10299	-0.263804	-0.147018	0.635185	-0.885653	0.37931	0.459843	0.0761739	1532.75	-0.527784	9.02053	8.35868	8.69338	9.75049	0.771856	0.723877	0.859607	70.8591	38.216	73.63	4.73262	-0.46874	35.8197	3.36833	41.5011	9.75049	63.9313	40.5576	42.9738	8.72414	11.5299	54.2731	9.02053	8.54988	45.778	60.1067	35.7262	34.8802	42.0644	54.0034
1800	1618	1388	1439	1372	1374	1468	1108	1007	1136	0.00998573	-0.0665788	0.0142575	0.852401	-0.315204	0.109718	0.145487	0.0734312	-1834	0.242483	11.2898	11.3652	11.1172	11.7398	0.525946	0.478732	0.948159	20.7858	19.8573	73.26	10.3478	0.215341	17.0791	2.70794	25.1335	11.7398	27.1397	26.3651	22.8896	11.1548	-12.2405	28.2738	11.2898	11.1118	46.1337	37.1734	18.6862	20.3632	16.4123	24.6129
4860	4687	4871	4903	5652	6245	6487	1028	15	2957	0.0522424	0.0714215	0.0745991	0.835614	-0.78067	0.293007	0.018249	0.0262869	-8811.75	0.420964	16.9885	18.6501	18.4152	16.7352	0.263277	0.66419	0.941894	77.065	42.0281	73.05	10.0925	0.37383	16.0081	3.4768	24.9047	16.7352	23.9301	25.7766	21.8008	16.9514	-20.6548	27.9398	16.9885	17.8129	23.8395	25.9629	31.333	32.8568	34.7398	32.737
3756	3399	3581	3610	3812	4025	4107	965	20	3164	0.0434086	0.0694045	0.0619839	1.03354	-0.716093	0.10495	-0.0857988	0.0337291	-12229.5	0.395755	15.3404	16.0143	15.907	15.0355	-0.441056	0.471695	1.01106	64.6163	34.7232	70.85	9.88195	0.351446	17.3403	3.26242	22.858	15.0355	18.6288	22.1219	18.122	15.2992	-23.0393	32.1616	15.3404	15.6213	37.6512	26.3633	25.4295	27.6999	24.6931	25.1463
1350	1332	1120	1076	875	902	801	182	10	460	-0.0576015	-0.143348	-0.0822383	0.791583	-0.863363	0.368999	0.255419	0.0235397	653.5	-0.434869	10.2472	9.28704	9.66204	11.0028	0.63448	0.717257	0.925051	57.6295	31.2209	68.73	5.66705	-0.386199	30.6904	3.14882	32.2201	11.0028	58.9028	33.438	34.6473	10.385	8.67791	57.2887	10.2472	9.56466	59.0492	20.3452	26.804	26.9131	30.0445	25.855
2295	2144	2035	2063	1987	2039	2023	1187	1013	1650	-0.0422535	-0.0682611	-0.0603314	0.980749	-0.446362	0.0625	0.0779286	0.0115361	-3765	-0.392206	12.7301	12.6473	12.6806	12.8946	0.427135	0.39685	0.993541	41.079	24.6384	68.12	10.5881	-0.348301	27.124	2.90985	24.9218	12.8946	24.0203	25.8094	25.5618	12.6723	-15.5568	31.3576	12.7301	12.5719	48.7863	29.6287	19.9964	22.1666	17.0792	21.1305
1938	1699	1509	1503	1440	1483	1431	1084	1008	1222	-0.0328542	-0.0919023	-0.0469089	0.956829	-0.361978	0.0724858	0.113733	0.0522845	-2325.75	-0.360649	11.4548	11.2689	11.4037	11.9325	0.484502	0.41695	0.985398	37.6319	23.5708	66.85	10.2725	-0.32028	24.2013	2.8672	24.9465	11.9325	20.3634	25.4994	24.3573	11.47	-13.2491	28.8952	11.4548	11.2924	46.1567	27.5842	19.8328	21.7042	17.6042	20.3973
966	812	649	669	611	674	569	85	15	268	-0.109402	-0.218305	-0.156169	0.664107	-0.89532	0.320659	0.402418	0.0678636	996.75	-0.538515	8.74598	8.28649	8.76772	9.32936	0.738288	0.68446	0.872461	75.305	40.9125	65.82	4.39683	-0.478272	39.5947	3.44576	43.8365	9.32936	46.8424	47.9598	50.9285	8.65795	9.98915	49.7276	8.74598	8.48556	37.5708	41.475	38.6031	38.452	46.1396	49.5223
877	763	524	566	445	454	375	75	7	138	-0.160576	-0.336252	-0.229194	0.501319	-0.901704	0.466151	0.601259	0.0902778	1817.75	-0.611976	8.2719	7.21125	7.68573	9.1378	0.844022	0.77537	0.794398	67.5451	36.3191	64.51	4.21716	-0.543534	36.5225	3.31166	39.5087	9.1378	60.8141	39.6963	42.1397	8.06202	12.2043	50.9783	8.2719	7.63461	47.2053	55.4824	36.9878	34.5678	41.6189	51.934
922	752	498	540	380	366	301	70	8	87	-0.237267	-0.420208	-0.338637	0.52443	-0.906915	0.558376	0.647317	0.104719	2048	-0.69702	8.14325	6.70176	7.15309	9.09367	0.865045	0.823459	0.806422	58.9666	31.8579	64.25	4.12129	-0.619079	31.1695	3.1701	34.1651	9.09367	43.1064	37.5951	39.2061	7.92641	12.6992	51.2315	8.14325	7.24316	56.324	56.8518	33.9241	30.6406	35.7171	47.9627
10172	9832	10083	9893	9934	10207	10254	2905	24	3434	0.0182562	0.0308526	0.0260693	0.520845	-0.704536	0.505615	0.286995	0.0113737	5482	0.296512	21.4672	21.7252	21.692	21.423	0.659617	0.79666	0.804581	75.3245	40.9248	64.14	14.2686	0.263312	38.3007	3.44611	48.6334	21.423	96.0363	31.4654	33.8407	21.6038	17.6325	58.5841	21.4672	21.4968	16.4922	40.8729	41.4264	41.9956	49.8296	52.1515
2690	2603	2361	2304	2240	2180	1921	429	25	1291	0.11573	0.0673594	0.16525	0.873783	-0.83519	0.395316	0	0.0911366	-4295	0.548757	13.2077	12.4311	12.9664	13.756	0	0.733919	0.956022	132.309	90.8992	61.3	7.54199	0.487322	46.0646	4.49628	55.1026	13.756	23.1237	70.7579	73.9677	13.3157	-16.255	32.2472	13.2077	13.0843	48.3707	22.7758	72.6957	75.6615	91.0713	77.2707
925	840	504	571	384	383	294	61	7	108	-0.241379	-0.463415	-0.344508	0.493506	-0.927381	0.480769	0.693548	0.100402	2378	-0.701024	8.29619	6.6494	7.26217	9.43539	0.885168	0.783392	0.79025	84.4887	47.0334	60.77	3.9365	-0.622635	33.3032	3.60968	53.7997	9.43539	66.6902	49.893	52.7387	7.95811	13.3476	53.3297	8.29619	7.26848	62.4772	68.7701	50.0131	44.2218	44.4439	58.7292
848	647	424	450	379	389	328	81	9	119	-0.142857	-0.340933	-0.203882	0.619497	-0.874807	0.455378	0.533175	0.157895	1393.25	-0.588563	7.66309	6.89643	7.29989	8.64904	0.81088	0.76935	0.852471	52.981	29.1286	59.69	4.32675	-0.522758	36.8052	3.07685	30.4764	8.64904	33.3936	33.7545	35.9917	7.51257	11.1689	43.4741	7.66309	7.2368	36.0266	52.0175	31.3231	29.255	35.0141	45.5057
4158	3467	3099	3022	3609	3861	3881	520	12	1494	0.14048	0.0851036	0.200593	0.640564	-0.850014	0.467	0.136535	0.143213	-1804.5	0.585381	14.4577	15.715	15.688	15.1351	0.51493	0.77584	0.862027	87.6643	49.3226	59.02	8.04145	0.519842	38.6577	3.66732	34.3374	15.1351	21.9892	39.648	42.2775	14.5794	-12.1745	34.9093	14.4577	15.3389	27.4367	23.5126	33.2239	37.108	31.0745	28.4927
735	491	330	316	333	398	312	78	12	112	-0.0443038	-0.238335	-0.063223	0.506623	-0.841141	0.458937	0.524845	0.222157	968.5	-0.398375	6.81128	6.78242	7.35576	7.88909	0.806635	0.771349	0.797189	52.5564	28.947	58.75	4.27266	-0.353845	52.0977	3.07044	30.0122	7.88909	12.2316	32.8562	36.072	6.91042	9.89388	34.5438	6.81128	6.9313	14.3055	26.7301	32.179	30.8937	37.064	34.9838
775	551	395	430	411	469	405	76	9	117	-0.0367454	-0.200436	-0.052443	0.558583	-0.862069	0.516529	0.457672	0.182195	970.5	-0.374308	7.54784	7.39864	7.76946	8.19818	0.77064	0.802352	0.823561	63.2729	34.0164	58.64	4.23582	-0.332456	54.5708	3.24013	35.7619	8.19818	23.0865	41.7028	44.1929	7.33723	9.90068	38.5773	7.54784	7.43499	25.7517	59.2299	35.3866	34.8224	41.7421	53.4386
801	613	395	421	369	397	351	76	6	96	-0.0733696	-0.285115	-0.104711	0.513196	-0.87602	0.560641	0.555838	0.182195	1402.75	-0.471336	7.49481	7.054	7.3496	8.49481	0.82221	0.824571	0.800623	42.0405	24.9549	57.67	4.23582	-0.418638	47.0969	2.92226	25.674	8.49481	37.8293	27.6276	30.9666	7.33723	11.1942	41.9606	7.49481	7.17258	31.5548	53.552	27.791	26.1812	31.0124	43.0987
829	667	431	480	312	319	254	66	11	101	-0.265786	-0.454744	-0.379303	0.64	-0.901049	0.424501	0.613059	0.111798	1687.75	-0.723873	7.82974	6.33303	6.83277	8.73726	0.849508	0.751553	0.861774	69.7343	37.5613	56.92	4.04124	-0.64295	30.0711	3.34899	40.8962	8.73726	46.9688	44.6135	46.6741	7.55369	11.9061	45.8299	7.82974	6.78242	60.2853	64.9504	41.6266	36.781	39.466	53.7213
1595	1589	1497	1543	1407	1489	1471	285	16	1010	-0.0666192	-0.0962401	-0.0951177	0.946565	-0.820642	0.12931	0.123365	-0.0150873	-1709	-0.456479	11.5555	11.3729	11.4191	11.6692	0.497811	0.505682	0.981861	58.6747	31.7175	56.46	6.58084	-0.405384	21.8322	3.16543	26.4478	11.6692	50.346	28.5168	26.9768	11.4395	-11.9559	29.596	11.5555	11.2055	52.149	35.2245	24.3791	26.5594	23.4029	28.9067
5321	5124	5291	5141	5277	5725	6093	1423	45	3576	0.045721	0.0617103	0.065287	0.866678	-0.722287	0.237039	0.00975466	0.0247454	-10887.5	0.402664	17.259	18.2646	17.8892	17.24	0.213667	0.61888	0.953424	44.2029	25.6963	53.79	11.2478	0.357579	13.1736	2.95092	24.4631	17.24	27.9134	25.491	20.3225	17.4253	-22.1637	26.3713	17.259	17.4099	36.3747	28.8095	27.1578	27.6817	30.2146	30.764
1086	953	745	782	630	663	563	75	6	219	-0.154144	-0.271514	-0.220045	0.598901	-0.921301	0.427451	0.489063	0.0454837	1765.25	-0.603722	9.21303	8.25726	8.71976	9.84081	0.78787	0.75329	0.842917	74.8722	40.6424	52.77	4.21716	-0.536178	37.1627	3.43816	44.8116	9.84081	48.861	48.4494	51.382	9.06537	12.0856	58.2101	9.21303	8.57262	52.6859	45.3125	38.0346	36.9196	44.907	50.2798
1327	1362	1040	1110	987	1037	971	159	27	474	-0.0415623	-0.174644	-0.0593383	0.721003	-0.88326	0.337526	0.327485	0.0467461	1145.25	-0.390042	10.354	9.90238	10.1218	11.0847	0.689283	0.696256	0.896697	66.4397	35.7079	52.05	5.4175	-0.346391	36.12	3.29297	37.9659	11.0847	67.3775	36.6321	38.8938	10.1316	10.4625	60.4576	10.354	9.95648	49.6331	46.8782	29.5842	30.2406	33.4482	42.1229
1465	1399	1323	1542	2239	2614	2913	487	10	1733	0.21716	0.190394	0.310065	1.12008	-0.651894	0.0854881	-0.244396	0.142023	-8900	0.676837	11.553	14.2817	13.7753	11.1842	-0.625218	0.440523	1.03852	55.874	30.4084	51.26	7.86761	0.601072	43.6524	3.12127	23.8247	11.1842	47.8999	25.745	28.811	10.9779	-20.7235	24.9905	11.553	13.0823	18.6631	65.656	22.3724	26.1287	15.2789	36.0648
1529	1484	1405	1990	2766	3323	3722	467	10	2052	0.148227	0.121374	0.21164	1.27614	-0.68531	-0.0400405	-0.239169	0.0983475	-9848.5	0.595936	12.5782	15.4974	14.9226	11.4063	-0.620729	-0.342111	1.08467	144.416	105.197	51.09	7.7584	0.529227	43.5899	4.72064	54.1553	11.4063	48.3368	59.0589	62.2528	11.2002	-21.435	26.0018	12.5782	14.0373	21.0396	112.648	83.3165	98.282	27.851	55.4329
788	542	338	407	598	628	576	162	8	155	0.23269	0.000921659	0.33212	0.668508	-0.701107	0.555874	0.19779	0.326358	154	0.692519	7.4108	8.32034	8.56354	8.15329	0.582642	0.822228	0.874384	126.437	84.4292	50.28	5.45136	0.615072	99.7719	4.38696	87.5123	8.15329	14.3455	128.668	91.5032	6.96582	5.36011	24.3552	7.4108	8.42494	2.83733	87.3158	87.1055	90.6583	110.681	115.481
831	654	401	449	327	347	278	55	7	85	-0.204204	-0.423286	-0.291416	0.483019	-0.915902	0.514286	0.672634	0.1549	1804	-0.662986	7.65741	6.52652	7.02711	8.68012	0.876179	0.801189	0.784612	65.089	34.9757	49.98	3.80295	-0.588873	38.3283	3.27031	37.8333	8.68012	41.7831	42.1339	44.827	7.3742	12.1734	44.9539	7.65741	6.88942	48.0005	66.7799	38.4209	34.4552	39.1107	54.0612
858	681	454	445	469	504	442	73	14	171	-0.0509259	-0.248396	-0.0726862	0.629268	-0.892805	0.41136	0.450479	0.165441	1119.25	-0.417334	7.63461	7.61741	7.95811	8.79797	0.766581	0.743716	0.85693	40.5281	24.4608	49.93	4.17934	-0.370663	52.2003	2.90284	25.1109	8.79797	41.6117	27.048	30.6851	7.68573	10.3827	42.9244	7.63461	7.76946	19.8887	30.5093	25.743	25.2503	28.8023	30.5836
889	760	623	651	538	558	523	137	12	289	-0.1379	-0.233766	-0.196844	0.805085	-0.819737	0.240473	0.333333	0.044112	607.25	-0.581711	8.66683	8.05689	8.23275	9.12581	0.693361	0.621855	0.93028	46.3199	26.462	49.93	5.15514	-0.51664	27.2832	2.97994	27.1336	9.12581	55.9906	28.9624	29.0321	8.54075	8.46816	45.0439	8.66683	8.13319	45.9349	45.3879	26.389	26.1616	29.6267	38.5449
839	833	488	615	378	390	282	49	5	68	-0.235443	-0.467841	-0.336031	0.334437	-0.941176	0.632432	0.783726	0.0779405	2665.5	-0.695226	8.50403	6.55767	7.30614	9.40911	0.92198	0.858364	0.694126	114.249	71.9684	48.95	3.65931	-0.617488	37.7307	4.15956	86.2796	9.40911	93.1832	50.1255	53.1663	7.87299	13.8652	54.1061	8.50403	7.23043	74.4431	98.8136	79.4027	70.8204	55.3331	73.6989
1010	1091	665	1185	2106	2505	2753	342	11	838	0.498303	0.290868	0.711461	0.721047	-0.686526	0.406516	-0.135157	0.385113	-4165	0.892724	10.5821	14.0153	13.5811	10.2946	-0.513191	0.740785	0.896715	139.562	99.3108	48.65	6.99319	0.792801	68.7866	4.6309	61.1544	10.2946	97.219	35.4511	36.7171	8.72852	-16.0893	12.4418	10.5821	12.818	16.8142	200.875	81.9648	96.9027	25.6959	40.8305
1029	994	876	1130	1750	2116	2238	171	6	861	0.0978373	0.0349515	0.139681	1.22889	-0.827968	0.106383	-0.137153	0.0891604	-3898.25	0.518855	10.4158	13.0804	12.8382	9.97996	-0.515705	0.473832	1.07112	99.121	58.3191	48.51	5.5505	0.460788	86.993	3.87796	35.7422	9.97996	72.7005	33.5766	30.3583	9.5683	-15.7383	18.2498	10.4158	12.0507	14.7796	99.6503	44.6526	54.1348	15.3545	45.0431
756	526	376	392	300	303	249	52	7	88	-0.220779	-0.373368	-0.315054	0.5	-0.901141	0.463415	0.628483	0.139588	1322	-0.680448	7.31861	6.29119	6.71657	8.07226	0.856573	0.77385	0.793701	46.5164	26.5351	48.27	3.73251	-0.604393	37.9004	2.98268	27.454	8.07226	19.7516	29.2429	31.5152	7.21765	10.9752	40.2763	7.31861	6.69433	40.3588	47.9564	30.7069	28.3443	33.7369	42.815
823	642	424	451	355	384	324	61	11	102	-0.189341	-0.379162	-0.270216	0.49827	-0.904984	0.478261	0.633588	0.134694	1639.25	-0.646503	7.66877	6.86829	7.26848	8.62671	0.858886	0.782027	0.792784	48.5262	27.302	48.22	3.9365	-0.574224	37.741	3.01114	28.4361	8.62671	40.4058	30.9995	33.2865	7.51257	11.7909	45.1509	7.66877	7.0807	41.5353	52.6129	30.1412	27.777	33.0116	44.2283
774	689	434	668	1230	1338	1302	249	5	244	0.471376	0.27359	0.67295	0.494205	-0.638607	0.663912	0.0715397	0.390877	-605	0.876316	8.74162	10.9195	11.0193	8.83228	0.415128	0.872376	0.790622	179.238	153.513	47.02	6.29119	0.778256	86.3266	5.35445	121.901	8.83228	74.626	99.096	80.572	7.57117	-8.45769	8.12709	8.74162	10.7144	7.26667	158.103	150.04	165.3	145.095	139.688
6187	6229	6874	6922	7660	8195	8575	2310	21	4898	0.0547955	0.103741	0.0782456	0.862078	-0.629154	0.220622	-0.0299019	0.00398464	-16923.2	0.427714	19.058	20.4681	20.1612	18.3995	-0.310384	0.60425	0.951734	44.1891	25.6915	46.79	13.2192	0.379823	19.1473	2.95073	24.2494	18.3995	27.4621	25.1556	22.2688	19.0138	-25.6741	19.5406	19.058	19.7126	18.0311	26.5564	35.0444	30.5744	33.2012	31.8598
1039	870	705	699	595	609	599	143	13	320	-0.111111	-0.213389	-0.158613	0.755319	-0.835632	0.276018	0.342593	0.0640558	755	-0.54131	8.87481	8.42964	8.47629	9.5464	0.699723	0.651097	0.910703	22.2262	20.0771	46.72	5.22932	-0.48075	29.0423	2.7179	20.7462	9.5464	41.4735	21.9213	21.9253	8.90013	9.10575	49.2491	8.87481	8.41083	44.7579	30.6719	21.4312	21.4912	22.7059	25.9837
973	671	500	471	464	515	510	202	27	331	-0.158749	-0.297872	-0.226581	0.939394	-0.698957	0.0461095	0.326087	0.143836	319	-0.609641	7.78049	7.98957	8.01559	8.75469	0.6883	0.358589	0.979376	5.56221	18.6496	45.77	5.86746	-0.541464	19.3828	2.65189	20.052	8.75469	2.03876	14.3202	10.155	7.93701	6.83277	36.3689	7.78049	7.74175	25.3	19.5041	21.9091	21.6795	23.5319	20.2798
1317	1418	1363	1810	2513	2941	3201	444	47	1722	0.0180115	-0.00176616	0.0257165	1.6242	-0.686883	-0.0985646	-0.236197	0.000733138	-8596.75	0.295169	12.1869	14.7377	14.3273	11.2346	-0.618147	-0.461927	1.17548	110.477	68.3765	45.76	7.62888	0.26213	37.6692	4.08917	35.0552	11.2346	76.6651	32.1108	34.4156	11.0875	-20.4854	25.45	12.1869	13.5956	20.6435	97.3465	50.1732	60.5459	17.0066	45.7888
935	784	576	633	479	491	417	106	10	179	-0.163636	-0.308848	-0.233572	0.649758	-0.864796	0.39629	0.489079	0.0787685	1464.25	-0.615848	8.5862	7.471	7.88909	9.22087	0.787879	0.734521	0.866132	72.3722	39.1142	45.66	4.73262	-0.546966	29.6781	3.39452	42.4995	9.22087	48.3778	46.0395	48.1915	8.32034	11.3555	50.7399	8.5862	7.82429	53.6842	59.5514	39.1494	37.0014	44.9028	55.9745
1823	1585	1439	1409	1368	1385	1347	1080	1010	1198	-0.0401156	-0.0882252	-0.0572763	0.975151	-0.318612	0.0514648	0.100694	0.0452811	-2466.5	-0.385471	11.2108	11.0439	11.1468	11.6594	0.465231	0.371966	0.991647	29.1259	21.3836	45.47	10.2599	-0.342324	24.3963	2.77562	25.1305	11.6594	21.1034	25.8481	24.8023	11.2898	-13.5112	28.0515	11.2108	11.101	43.9341	23.9806	19.1172	20.8606	16.8783	17.7927
1830	1638	1459	1463	1383	1392	1334	1088	1008	1162	-0.0560984	-0.113528	-0.0800962	0.937883	-0.335775	0.0575831	0.145054	0.0356907	-1861.5	-0.43106	11.3522	11.0083	11.1655	11.7879	0.525424	0.386158	0.97885	40.3144	24.3926	45.47	10.2851	-0.38281	25.1196	2.90014	24.9528	11.7879	25.7807	26.004	25.1931	11.3419	-12.3014	28.9883	11.3522	11.1414	47.2864	29.2435	20.2719	22.1172	18.299	21.8457
2076	1959	1743	1754	1649	1682	1624	1127	1007	1372	-0.0586092	-0.116557	-0.083683	0.94129	-0.424706	0.0609172	0.146284	0.019685	-2160.5	-0.4374	12.0599	11.7543	11.8926	12.5125	0.526905	0.393471	0.980034	43.6523	25.5036	45.41	10.4066	-0.388438	26.2174	2.94352	25.0154	12.5125	28.8528	26.325	25.8659	12.0346	-12.9276	30.9917	12.0599	11.8143	50.1472	29.0604	20.4177	22.5109	17.8931	21.4363
794	610	420	450	317	329	264	68	7	96	-0.23348	-0.400689	-0.3332	0.601533	-0.888525	0.462185	0.590613	0.113456	1482.75	-0.693269	7.66309	6.41507	6.90344	8.48093	0.839011	0.773165	0.84415	60.7385	32.7263	44.63	4.08166	-0.615767	31.981	3.19864	34.8002	8.48093	39.3023	38.8147	40.6452	7.48887	11.4031	43.8901	7.66309	6.81846	50.9731	54.6166	36.3531	32.8584	38.1145	48.9157
2228	1915	1769	1845	2283	2471	2495	263	11	1514	0.240283	0.202582	0.343093	0.910319	-0.862663	0.312131	-0.15713	0.182343	-7741.5	0.700063	12.2649	13.563	13.5194	12.4181	-0.539618	0.678337	0.969165	78.7822	43.1427	44.12	6.40696	0.621691	75.2392	3.50727	25.763	12.4181	13.7407	26.0684	28.0066	12.0942	-19.7822	29.0515	12.2649	13.1675	25.5633	36.2706	30.152	34.4366	24.8525	30.5441
737	568	402	469	696	709	710	125	6	190	0.107658	-0.0646673	0.153663	0.601202	-0.77993	0.448476	0.308756	0.211765	424.75	0.535619	7.76946	8.92112	8.91693	8.28164	0.675883	0.765443	0.843996	73.0688	39.5345	43.83	5	0.475717	102.478	3.40663	40.7819	8.28164	45.0953	44.9255	30.6821	7.38032	7.517	33.1106	7.76946	8.8621	4.43212	78.0291	36.0015	40.0557	34.5959	54.0582
708	511	324	342	278	294	238	71	8	39	-0.153025	-0.364486	-0.218353	0.508403	-0.861057	0.718412	0.617089	0.186951	1393.25	-0.602171	6.99319	6.19715	6.6494	7.99479	0.851365	0.895621	0.798122	41.7891	24.8714	43.73	4.14082	-0.534877	38.352	2.91899	25.5789	7.99479	32.7201	27.3111	29.6219	6.86829	11.1689	37.4675	6.99319	6.52652	32.5538	52.044	29.7405	27.1464	32.0752	43.2842
3411	3154	3154	3138	3737	4029	4146	1489	1012	2812	0.124375	0.124375	0.177597	0.919753	-0.527901	0.180414	-0.0830063	0.0837388	-11029.5	0.562098	14.6403	16.0648	15.9123	14.6652	-0.436218	0.565054	0.972502	39.4506	24.121	43.57	11.4191	0.499166	8.6563	2.88934	25.0228	14.6652	17.7588	25.3425	18.1528	14.6652	-22.2597	32.5089	14.6403	15.5182	27.3895	25.4909	22.8271	23.1567	24.4061	24.4347
1737	1507	1320	1313	1299	1306	1270	1052	1007	1068	-0.0228594	-0.0888728	-0.0326377	0.888184	-0.301924	0.0828682	0.147316	0.0634977	-1704.25	-0.319575	10.9502	10.8293	10.9307	11.4649	0.528142	0.435976	0.961245	30.6301	21.724	42.64	10.1704	-0.283806	23.0929	2.79027	24.8968	11.4649	22.5342	25.6372	24.1593	10.9696	-11.9448	27.6811	10.9502	10.9111	41.1401	27.9209	19.3182	21.0254	17.2505	20.3162
966	731	587	529	481	503	466	104	7	207	-0.111742	-0.218333	-0.159504	0.590618	-0.857729	0.387574	0.450397	0.100038	1129.5	-0.542321	8.08758	7.75286	7.95285	9.00822	0.766535	0.729096	0.839014	10.222	18.8026	42.01	4.70267	-0.481659	35.1887	2.65913	19.2029	9.00822	23.4353	17.45	18.9393	8.37297	10.4143	48.6622	8.08758	7.83517	33.3734	7.07374	21.8086	21.449	23.4468	12.3651
1065	899	771	780	710	730	681	165	11	490	-0.0982906	-0.173629	-0.140316	1.09479	-0.816463	0.127337	0.129397	0.0481481	-681.75	-0.51964	9.20516	8.79797	9.00411	9.65132	0.505795	0.503097	1.03065	56.9254	30.8917	41.6	5.48481	-0.461499	27.7018	3.13772	27.0674	9.65132	41.7291	29.3515	29.5624	9.16962	-8.8012	20.2374	9.20516	8.92112	40.7806	35.3662	28.0247	28.7101	31.2547	34.9981
1374	928	570	623	1040	1272	1386	147	9	421	0.510099	0.308752	0.728287	0.487194	-0.841595	0.613407	0.0403587	0.466167	-1309	0.899707	8.54075	11.1495	10.835	9.754	0.343015	0.849669	0.786866	69.011	37.1463	41.33	5.27763	0.799009	117.474	3.33661	28.9408	9.754	-18.5234	27.3727	11.9797	8.29134	-10.9391	11.9631	8.54075	10.1316	6.0424	58.1372	30.3946	33.8991	28.2285	42.8192
1777	1548	1360	1355	1296	1295	1228	1061	1008	1062	-0.0453497	-0.109677	-0.0647488	0.887279	-0.314599	0.078125	0.168302	0.0520997	-1447	-0.401554	11.0657	10.7086	10.8999	11.568	0.552115	0.427494	0.960919	39.321	24.0809	41.27	10.1993	-0.356608	24.1303	2.88774	24.9246	11.568	22.3693	25.6625	24.5152	11.0793	-11.3107	28.6085	11.0657	10.9027	44.9991	28.1501	20.2974	22.0431	18.5678	21.4464
4682	4621	4975	4878	5016	5320	5457	1096	30	3729	0.00050226	0.0373919	0.000717197	0.979317	-0.762822	0.143645	-0.026953	-0.0146849	-12523.8	0.0895116	16.9595	17.6056	17.457	16.6563	-0.299826	0.523717	0.993058	47.7355	26.996	40.67	10.3103	0.0794895	18.9988	2.99985	23.9687	16.6563	20.7134	24.0683	20.9793	17.0712	-23.2226	27.9598	16.9595	17.118	37.1218	27.3767	26.3514	26.6894	29.2632	29.244
1125	896	712	684	612	645	625	140	38	351	-0.119497	-0.230769	-0.170584	0.892857	-0.84375	0.229418	0.283668	0.0839498	478.75	-0.5546	8.81087	8.54988	8.64012	9.64057	0.657057	0.612176	0.962928	20.797	19.8589	40.66	5.19249	-0.492552	28.6037	2.70802	20.8157	9.64057	26.0033	20.1714	19.9301	8.92949	7.82293	46.3307	8.81087	8.49018	39.7854	22.4063	21.1781	21.2924	22.3165	21.0525
803	575	409	391	313	319	274	70	8	125	-0.20649	-0.362559	-0.294681	0.713755	-0.878261	0.365482	0.499348	0.134392	1121	-0.665453	7.31238	6.49507	6.83277	8.31552	0.793355	0.714972	0.893682	27.948	21.1309	40.46	4.12129	-0.591062	33.6523	2.76464	21.5657	8.31552	22.3932	20.7239	21.9088	7.42291	10.3881	40.6129	7.31238	6.78966	36.7829	24.7323	25.8082	23.7739	27.945	26.746
718	501	341	382	494	421	563	210	9	195	0.0115942	-0.178824	0.0165463	1.25215	-0.580838	0.283088	0.0682303	0.220126	-367.5	0.25482	7.25584	8.25726	7.49481	7.94229	0.408626	0.65661	1.07783	28.4151	21.2296	39.81	5.94392	0.226333	63.755	2.76894	24.2267	7.94229	23.9247	24.7933	28.4611	6.98637	-7.16285	4.091	7.25584	7.90513	6.77722	67.6216	23.1114	24.5122	23.3042	42.5932
968	726	505	463	401	418	346	79	11	147	-0.248455	-0.409709	-0.354606	0.733553	-0.891185	0.348115	0.530032	0.114812	1531.75	-0.707808	7.73619	7.02035	7.47697	8.98764	0.809283	0.703463	0.90187	31.4394	21.9154	39.8	4.29084	-0.62866	28.212	2.79844	22.2568	8.98764	21.3055	21.5891	21.3272	7.96337	11.5273	48.3173	7.73619	7.3742	34.4555	12.4515	24.8342	23.2163	27.1352	18.7563
1584	1497	1207	1192	1126	1174	1156	224	100	616	-0.0360515	-0.142748	-0.0514721	0.803206	-0.850367	0.291547	0.24802	0.0572154	405.25	-0.371984	10.6029	10.4951	10.5493	11.4395	0.628293	0.663085	0.929556	31.5594	21.9443	39.74	6.07318	-0.33035	29.8927	2.79967	22.746	11.4395	41.7064	24.2783	24.6705	10.6472	7.40016	55.5296	10.6029	10.4035	44.4576	26.6606	19.7465	21.1213	18.5709	20.6158
797	687	392	408	297	305	239	55	8	47	-0.270665	-0.506579	-0.386241	0.346667	-0.919942	0.654412	0.796078	0.131783	2250.5	-0.728259	7.41686	6.20582	6.73132	8.82373	0.926798	0.868195	0.702485	38.3785	23.7931	39.47	3.80295	-0.64686	32.8846	2.87619	24.3225	8.82373	65.2812	26.0008	27.2185	7.31861	13.1047	47.0498	7.41686	6.67194	45.4563	47.2716	28.3203	24.7269	27.9253	38.0971
980	883	760	811	814	857	818	152	8	468	-0.068917	-0.143042	-0.0983839	0.968278	-0.82786	0.171681	0.158793	0.0385832	-484.5	-0.461645	9.32553	9.35229	9.49861	9.59372	0.541515	0.555786	0.989312	62.9504	33.8491	38.53	5.3368	-0.409992	32.7596	3.23481	28.7345	9.59372	61.1082	30.0271	31.4247	9.12581	-7.85413	20.8851	9.32553	9.33702	32.9934	49.5395	29.485	31.3159	31.5398	41.8246
973	786	674	651	575	601	541	135	12	289	-0.107642	-0.182844	-0.153658	0.755064	-0.828244	0.305288	0.314381	0.0586592	573.5	-0.535614	8.66683	8.14828	8.43901	9.22871	0.679963	0.673344	0.910601	42.2748	25.0332	38.45	5.12993	-0.475693	30.4937	2.92531	25.6693	9.22871	37.5886	27.6147	28.3744	8.76772	8.30828	46.3383	8.66683	8.31552	39.928	24.1231	24.845	24.9396	27.3682	25.9524
1673	1624	1693	1625	1558	1670	1709	312	15	1176	-0.0821349	-0.0614379	-0.117273	1.04666	-0.807882	0.0995406	0.0386952	-0.0426482	-3109	-0.489477	11.7567	11.9559	11.8642	11.7543	0.338235	0.463447	1.01532	24.5637	20.4728	37.85	6.78242	-0.434686	19.2919	2.73564	25.4779	11.7543	43.3158	27.5058	24.9938	11.9184	-14.5951	29.7474	11.7567	11.5928	47.0048	19.4594	18.776	20.5463	16.3248	14.6938
793	574	394	411	438	465	449	87	7	172	0.037851	-0.149149	0.0540231	0.724706	-0.848432	0.423786	0.301587	0.214357	484.75	0.37803	7.43499	7.65741	7.74731	8.31069	0.670612	0.75113	0.898229	58.2893	31.5332	37.84	4.43105	0.335758	107.08	3.15929	32.3138	8.31069	25.7002	36.5237	23.0039	7.33104	7.85548	33.464	7.43499	7.59436	17.9241	47.8353	32.4181	32.1865	37.7951	45.8713
1592	1403	1313	1400	1681	1855	2017	360	9	1208	0.131326	0.0986187	0.187508	1.08889	-0.743407	0.172036	-0.140582	0.114035	-5585.5	0.572365	11.1869	12.6348	12.2871	11.1949	-0.519968	0.556168	1.02879	44.9657	25.9677	37.38	7.11379	0.508297	54.7033	2.96127	24.7036	11.1949	28.9895	25.9069	29.6934	10.9502	-17.7427	25.0533	11.1869	11.8902	25.8473	44.2916	20.5923	23.2626	16.5021	28.1595
876	740	515	544	343	336	270	66	13	109	-0.303797	-0.458128	-0.433588	0.563636	-0.910811	0.432292	0.653631	0.0554791	1971.5	-0.756878	8.16331	6.4633	6.95205	9.04504	0.867849	0.756123	0.826037	60.865	32.7893	36.23	4.04124	-0.672246	27.4363	3.20069	35.2689	9.04504	54.2995	37.1118	37.9929	8.01559	12.5391	51.525	8.16331	7	67.4259	49.5607	35.7339	31.5682	35.1556	44.5872
1015	969	797	925	783	846	839	251	17	854	-0.159273	-0.252747	-0.227371	2.26471	-0.74097	-0.192737	-0.149254	-0.000313775	-3853	-0.610349	9.74348	9.43164	9.4578	9.89558	-0.530447	-0.577637	1.31322	75.2693	40.8902	35.95	6.30799	-0.54206	16.5908	3.44514	27.7791	9.89558	71.1552	28.1505	24.77	9.27156	-15.6771	16.3678	9.74348	9.21695	51.3004	71.7319	36.1991	37.0225	42.4569	58.1302
2047	1928	1624	1678	1713	1770	1759	1292	1153	1246	0.0472279	-0.0385133	0.067433	0.757983	-0.329876	0.177829	0.175251	0.0824859	-1572.75	0.407028	11.8831	12.0713	12.0964	12.4462	0.559612	0.562343	0.911773	50.2686	27.9957	35.88	10.8915	0.361465	13.4321	3.03643	25.5334	12.4462	29.1454	27.0551	22.2691	11.7543	-11.6293	30.9515	11.8831	11.9652	40.6091	35.087	21.5202	23.7818	19.0456	25.5284
890	780	475	478	365	375	321	87	8	139	-0.184539	-0.409214	-0.263381	0.617737	-0.888462	0.403433	0.588595	0.123212	1848	-0.641005	7.81885	6.84702	7.21125	9.20516	0.838054	0.738908	0.851663	36.7849	23.3244	35.86	4.43105	-0.569328	31.5102	2.85718	23.7965	9.20516	61.4523	25.6981	26.5823	7.80245	12.2716	48.9952	7.81885	7.14657	45.5507	37.1375	26.5223	23.8049	27.7499	33.1931
1217	1031	845	826	745	807	768	142	26	439	-0.100977	-0.198141	-0.144155	0.872464	-0.86227	0.222321	0.262707	0.0603281	336.25	-0.524337	9.38268	9.15771	9.31018	10.1023	0.640458	0.605796	0.955541	36.0652	23.1201	35.69	5.2171	-0.465666	30.2373	2.84881	23.8509	10.1023	34.7852	25.1885	25.7282	9.45407	6.95378	47.8151	9.38268	9.06537	42.7126	25.9308	22.0471	22.5644	23.1331	23.7017
1001	813	639	660	804	850	878	221	11	521	0.150831	0.0315664	0.215325	0.961894	-0.728167	0.248738	-0.0121507	0.187281	-1729.25	0.599374	8.70659	9.57557	9.47268	9.33319	-0.229897	0.628899	0.987133	55.0464	30.0348	35.44	6.04594	0.532308	79.1628	3.10843	25.9535	9.33319	37.05	27.9531	28.5948	8.61325	-12.0029	13.6607	8.70659	9.29862	17.0028	42.109	26.4504	28.6062	26.4565	34.62
[truncated: 272 more rows]
[truncated: 18 more columns]
